# Supplementary material for: Genome-wide analysis of long noncoding RNA stability
Source: HighWire-hosted journal article supplement (doi:10.1101/gr.131037.111), 2012-03-09
Supplement: Supp_Table_1.xlsx [file Supp_Table_1.xlsx]

## Sheet: Sup Table 1.txt
ProbeID	Accession ID	Classification	0h	0.5h	2h	4h	8h	16h	32h
IVGNm06718	AK088263,AK131970,AK145498,AK146330,AK151408,AK152063,AK167775,AK168332,AK168769,BC043017,NM_012053,U67771	mRNA	59920	74681.5	47880.2	57101.3	43504.4	41328	22274.5
IVGNm14027	AK003188,AK011771,AK012341,AK032914,AK050635,AK076696,AK081725,AK083361,AK088041,AK133725,AK135448,AK137223,AK141243,AK150798,AK151479,AK151773,AK152810,AK152993,AK153387,AK153402,AK153851,AK162049,AK162313,AK162440,AK163799,AK164113,AK164671,AK165938,AK166021,AK166033,AK166058,AK166089,AK166615,AK166807,AK167843,AK167873,AK168424,AK168467,AK183068,AK185520,AK188001,AK194927,AK196726,AK204373,AK2…	mRNA	57632.2	72405.3	46990.1	54132.1	40620.5	47144.6	31315.9
IVGNm35115	AK077930,AK087955,BC116218,NM_175015	mRNA	57118.6	69071.7	50370.1	51512.4	44779.7	34424.5	10371
IVGNm25764	AK003148,AK011213,AK012425,AK012584,AK019233,AK028106,AK146325,AK146976,AK152461,AK153401,AK168237,BC042940,BC062874,BC081449,NM_020600	mRNA	56888.5	74058.9	46931.5	55017.2	42257.5	43787.4	28732.7
IVGNm02707	AK002998,AK008422,AK011211,AK011800,AK013923,AK014593,AK088967,AK153486,AK164445,AK169053,BC021402,BC025077,BC069896,NM_025919	mRNA	56553	73532.9	47547.3	56890.7	40427.7	34960.6	11321.7
IVGNm25765	AK012052,AK013524,AK018725,AK028244,BC034506,BC086775,BC086938,NM_023133	mRNA	54937	75392.1	48497.5	56203.7	44263.6	43284.3	29981.7
IVGNm11894	AK078077,BC003791,BC026925,NM_007450,U27315,X74510	mRNA	54567.9	66736.6	52011.6	51743.3	42815.2	29847.8	10647.9
IVGNm03140	AK002493,AK012242,AK017772,AK051226,AK159797,AK160528,AK160739,AK161234,AK166417,AK166786,AK166800,AK166889,AK166945,AK168086,AK168096,AK168196,AK168349,AK169612,AK186349,BC020322,BC036295,BC044739,BC046760,D29802,NM_008143,X75313	mRNA	53459	68009.2	52613.4	52354.3	38643	18300.7	7751.75
IVGNm34098	NM_178184	mRNA	53093.3	55529.3	6223.69	6880.99	5258.13	4842.74	4475.58
IVGNm05667	AK002235,AK009663,AK010681,AK012424,AK012481,AK020477,AK020754,AK050611,AK050622,AK152449,AK160552,AK164079,AK167533,AK168044,AK168106,AK169016,AK172446,BC020401,BC058690,NM_009095,U78085,Y12431	mRNA	52702.2	65745.4	51650.2	52225.6	46503.5	37539.4	12619.6
IVGNm02834	AF287271,AK002579,AK010680,AK012694,AK018730,AK150671,AK168133,BC025918,BC081448,NM_022891	mRNA	52299.1	68491.3	51816.2	51144	40071.5	16233.3	8739.68
IVGNm05189	AF029844,AK012756,AK027911,AK168191,BC003899,BC023139,BC039635,NM_018796	mRNA	52255.3	57098.5	45423.5	44311.8	39900.2	25879.5	10685.4
IVGNm32342	AK012469,AK076001,AK131618,AK133726,AK150270,AK151196,AK153019,AK159539,AK169181,AK170429,AK183844,AK188217,AK203121,AK205443,BC089335,M24849,M26251,NM_011701,X51438,X56397	mRNA	51924.8	73999	53879.2	51025.6	44856.1	30460.2	11160.4
IVGNm25985	AK007609,AK077512,AK146318,AK156035,AK159882,AK168784,AK168903,BC065799,BC082289,BC086896,CT010169,NM_009438	mRNA	51473.3	72603.1	52026.8	52189.6	46732.9	35591.5	18397.9
IVGNm10146	AK003501,AK011634,AK012396,AK012439,AK012655,AK013246,AK014283,AK147108,AK152159,AK166582,AK168182,AK168599,BC086796,BC096413,NM_009084,X73331	mRNA	50874.4	64547.5	48154.8	47274.1	44198.2	44146.2	30898.6
IVGNm21189	AK008301,AK010689,AK012722,AK018702,AK152132,BC036987,BC081452,BC100456,NM_013765,U67770	mRNA	50319.2	62148.4	47927.2	45781.2	39521.2	19558.5	11027.7
IVGNm05817	AK005147,AK011207,AK150738,BC012641,NM_013725,U93864	mRNA	49239.1	58008.9	46882.5	49120.4	42744.5	26836.8	11180.2
IVGNm19484	AK013903,BC012491	mRNA	47905.1	52448.7	44381.6	46713.9	39981.8	24407.7	8974.82
IVGNm15853	AK002943,AK012583,AK019276,AK150447,BC132269,BC132275,M37829,NM_009941,X54691	mRNA	47638.5	54778.5	45790.4	42858.4	41135.2	42807.7	29420.9
IVGNm16085	AJ844648,AK002361,AK007625,AK008098,AK011068,AK012432,AK050639,AK088054,AK088279,AK135186,AK141433,AK151950,AK165962,AK166748,AK166957,AK167054,BC003459,BC094036,BC132321,BC132323,NM_024212	mRNA	47435.6	65924.3	54367.7	52556.2	43954.7	22762.3	10769.7
IVGNm03457	AK007273,AK010413,AK012443,AK013027,AK013873,AK132747,AK160683,BC019850,BC100341,NM_011664,X51703	mRNA	47018.6	60069.2	42888.8	28537.8	15036.7	8572.45	6157.99
IVGNm06537	AK004298,BC002063,BC099479,M33214,M57470,NM_008495,X15986,X51903,X53067,X66532	mRNA	45883.2	65222.2	51022.1	52042.5	44749	36948.4	20979.5
IVGNm31675	AK129370,BC005803,BC019606,BC034759,BC060624,BC069967,BC092085	mRNA	45834.7	52442.1	49332.6	45505.6	41929.5	31976.5	13735.3
IVGNm02425	AK145258	ncRNA	45708	72734.3	48899	51886.3	42237	50620.9	37634.3
IVGNm25989	AK077529,AK145404,AK146983,AK161783,AK164335,AK167687,AK168762,AK169610,AK185490,BC056169,BC083343,BC083344,BC083345,BC085256,M13445,NM_011653	mRNA	45565.3	49034.4	50024.2	42595.7	30823.1	9225.06	2298.91
IVGNm33094	AF033377,AK034899,AK136353,AK186726,BC005629,M35970,M65037,NM_008704,U85511	mRNA	45055.1	53125.3	45702.4	42021.2	40945.2	35194.4	16867.7
IVGNm24249	AF030559,AK002621,AK003460,AK010314,AK011035,AK083276,AK084009,AK145684,AK148891,AK150599,AK151081,AK151600,AK152730,AK152788,AK152976,AK153099,AK159444,AK159737,AK159978,AK160199,AK160608,AK164383,AK166525,AK166603,AK166979,AK167119,AK167160,AK167728,AK167764,AK168692,AK168941,AK169184,AK193315,AK201737,AK212560,AK213511,AK216817,AK217965,AK217971,AK220031,AK220050,BC013253,BC037127,BC046616,DQ4…	mRNA	44563	48670	47525.5	43194.3	40460.1	35358	15654.7
IVGNm20297	AK004297,AK012104,AK149990,AK163273,BC029754,NM_026444	mRNA	44002.9	45568	39943.8	38541.8	31115.1	19786.4	7877.35
IVGNm21880	AK149021,BC046291,NM_001163588,NM_001163589,NM_013639,X15475	mRNA	43296.1	51256.5	45967.1	42136.9	40759.3	27793.2	16260.4
IVGNm04726	AF182040,AK002347,AK003920,AK212071,AK215780,AK219146,BC010802,BC019157,BC037667,NM_023168	mRNA	43030.2	48545.1	43326.8	41436.2	38672.4	26213.4	15476.8
IVGNm32157	AK077487,AK077489,AK133629,AK133739,AK133786,AK158857,BC014736,NM_007694,X51429,X53028	mRNA	42975.2	50401.2	42394.6	40689.7	39707.2	37147.4	21383.9
IVGNm10066	AF318184,AK028681,AK029128,AK031606,AK050958,AK083307,AK088402,AK144894,AK161597,AK161706,AK163275,AK165167,AK166681,AK168579,AK168623,BC005460,NM_010880	mRNA	42892.9	52824.5	40461.3	35751.1	18849	6896.16	4201.77
IVGNm12941	AB026432,AF159853,AK004284,AK145328,AK146522,AK154303,AK155020,AK155920,AK157491,BC002210,BC009661,NM_015735	mRNA	42716	48558.6	42748.8	42112.6	37214	28716.4	11090.3
IVGNm04771	AJ310346,AK032936,AK075584,AK150895,AK151175,AK167640,AK168009,AK168295,BC021351,BC024463,NM_145139	mRNA	42070.6	45696.7	40354.9	36602.8	22983.5	7866.88	2900.23
IVGNm22349	AK089294,AK093885,AK150364,AK150579,AK150622,AK150636,AK150694,AK150768,AK150946,AK151256,AK151275,AK151374,AK151829,AK151962,AK152036,AK152045,AK152168,AK152187,AK152188,AK152406,AK152458,AK152567,AK152593,AK152638,AK152680,AK152828,AK152881,AK153191,AK153291,AK159097,AK159209,AK159512,AK159580,AK159642,AK159743,AK159896,AK166864,AK166938,AK167143,AK167366,AK167698,AK167750,AK169139,AK171195,AK1…	mRNA	41182.8	46065.1	39329.7	40272	37343.3	36441.9	31839.1
IVGNm04707	AK206286	mRNA	40710	47666.2	38795.7	37169.6	30333	13784.6	4117.11
IVGNm14028	AK028938,AK032997,AK040474,AK077866,AK087985,AK128976,AK134195,AK144874,AK145509,AK145545,AK146508,AK146947,AK150136,AK150902,AK151487,AK151812,AK151945,AK152146,AK152447,AK152587,AK152826,AK153275,AK153936,AK155325,AK159155,AK159421,AK159514,AK159806,AK159829,AK161993,AK163063,AK164406,AK166212,AK166595,AK166596,AK166719,AK166747,AK166751,AK166758,AK166788,AK166815,AK166829,AK166851,AK166968,AK1…	mRNA	40633.7	44739.7	38241.9	40859.7	33328.5	26128.7	13238
IVGNm19318	AB041808,AF107848,AF116268,AK078037,AK132636,AK147051,AK159563,AK168996,AK182338,AK187312,AK215851,AY519501,AY519502,AY519504,AY682719,BC013824,BC013840,BC018408,BC034446,BC038067,BC048834,BC061496,BC062654,BC080816,BC092055,BC106133,M13964,NM_001077507,NM_001077510,NM_010309,NM_022000,NM_201616,NM_201618,NR_003258.1,NR_003258.2,Y00703	mRNA	39949.1	46620.8	43841.9	42961.6	38375.6	46782	33136.5
IVGNm24725	AF222853,AK075746,AK131581,AY238604,BC061190,BC083357,NM_175329	mRNA	39557.6	52497.6	35860.3	38757.8	34626.4	22812.8	8242.11
IVGNm14301	AF232716,AF232717,AK020120,AK088790,AK146927,AK146975,AK152342,AK164421,AK182201,BC002249,BC051547,BC051953,BC062964,NM_019830	mRNA	39113	44183.5	39161.5	38407	28657.6	20002.7	9178.87
IVGNm17276	AK005309,AK168292,AK169318,BC012241,BC096643,NM_138597	mRNA	38955	46934.1	35789.9	37123.6	34751.8	17221.3	5851.07
IVGNm24897	AK167638,AK171972,BC056177,NM_001033166	ncRNA	38483.8	47369.1	34848.1	34617.8	29513	20992.9	10437.9
IVGNm30081	AK018753,AK131596,AK138995,BC052873	ncRNA	37796.7	46719.7	36300.8	29647	20571.6	12931.2	17440.9
IVGNm30010	AK018753,AK131588,AK131596,AK142700,BC052873	ncRNA	36223.2	54135	41243.9	37431.8	35516.6	35304.2	34305
IVGNm05871	AF232716,AF232717,AK020120,AK088790,AK146927,AK146975,AK152342,AK164421,AK182201,BC002249,BC051547,BC051953,BC062964,NM_019830	mRNA	36212.7	42304.5	36013.1	34939.8	26102.3	18721.3	8279.02
IVGNm04643	AJ300739,AK002254,AK003540,AK004522,BC031539,NM_023172	mRNA	36189.5	48510.6	35774.8	34872.9	32558.9	23438.3	8397.7
IVGNm22015	AK005345,AK151325,AK152795,AK170899,AK180286,AK184297,AK187209,AK188931,AK189776,BC028457,BC092006,NM_026914	mRNA	35987	45000.4	35000.4	33662.9	34370.2	32595.8	22416.8
IVGNm16657	AK043976,AK076572,AK098155,AK146797,AK150426,AK150843,AK151004,AK151128,AK151224,AK151920,AK152054,AK152890,AK153167,AK153282,AK159491,AK159540,AK159758,AK160043,AK164110,AK164193,AK166709,AK166812,AK167159,AK167863,AK168198,AK168369,AK168617,AK168879,AK168890,AK168932,AK169080,AK169084,AK169105,AK169142,AK169300,AK169308,AK169414,AK192928,AK200623,BC014854,BC020417,BC055892,L01062,NM_007505	mRNA	34930.1	39428.3	37058.8	36140.6	26060.5	14658.2	4280.01
IVGNm16832	AK002989,AK008276,AK088781,AK151167,AK153074,AK166642,AK167053,BC061140,L25255,NM_011239,X56045,X56046	mRNA	34519.9	37986.1	37864.7	35672.3	25085.2	14515.7	6632.95
IVGNm33162	AK004673,AK013695,AK088141,AK145841,AK150288,AK150978,AK151001,AK151552,AK151784,AK151923,AK151992,AK152148,AK152715,AK152719,AK152850,AK152897,AK153004,AK153348,AK153426,AK153546,AK159762,AK160057,AK160508,AK161302,AK162314,AK166308,AK167353,AK168002,AK168241,AK168663,AK168803,AK169027,AK169055,AK169640,AK180928,BC054805,M19381,NM_009790,X61432	mRNA	34412.9	40860	31725.3	33615.3	31026.5	23573.8	14780.9
IVGNm28736	AK019322,AK173233,BC059083,BC062917	mRNA	33920.5	36522.9	35318.8	32975.2	22157.1	10943.7	4673.78
IVGNm34097	BC119335,NM_178183	mRNA	33876	22616.3	6460.78	7099.2	7322.18	6604.02	5135.02
IVGNm16767	AK010882,AK014005,AK075711,AK075880,AK145661,AK145754,AK145918,AK147038,AK159969,AK168465,AK172867,BC009007,NM_009840,Z37164	mRNA	33483.5	33287.1	33051.6	26786.1	17465	6965.1	3304.79
IVGNm04401	AK146388,AK148493,AK152968,AK158051,AK160687,BC048668,NM_001017429	mRNA	32665.7	43531.8	32795.9	35259.8	35069	34270.4	23317.7
IVGNm21995	AK002815,AK011288,AK151299,AK170272,AK177843,AK187999,BC005620,BC082790,NM_025567	mRNA	31749.8	37321.5	31304.1	33442.6	23069.5	10861.8	5097.97
IVGNm31372	AK028070	mRNA	31507.5	36037.7	28984.6	31077.3	22427.6	9369.93	2574.46
IVGNm13903	AK075760,AK078427,AK144740,AK145444,AK146224,AK146301,AK146344,AK146367,AK146593,AK147157,AK151317,AK151528,AK151961,AK153414,AK159810,AK211658,BC003805,BC058723,L12693,NM_001109745,NM_001109746,NM_013493,U20326,X63866,Z11870,Z11871	mRNA	31426.5	30006.8	25367.9	22169	13559.9	7055.26	3120.77
IVGNm22282	AK148854,AK178066,BC010249,BC011068	mRNA	31022.8	37295.7	31075.3	34799.5	30963.3	22357.8	8516.31
IVGNm09309	AK136262,AK138996,AK139026,AK141881,AK142003,AK142751,AK159262,AK159675,AK162500,AK166684,AK166798,AK166978,DQ539915	mRNA	30048.8	48666.4	30922.1	26950.6	14024.4	7525.43	3137.36
IVGNm24163	AK013384,AK076132,AK165609,AK183741,AY137376,BC043069,BC050820,D90151,DQ397821,DQ397822,L36663,NM_001048061,NM_010448	mRNA	29332.5	32188.5	29339.3	26572	15714.5	5264.68	2035.66
IVGNm01954	AK007063,AK088164,AK146434,AK150307,AK158675,BC010700,BC048777,BC055785,D21073,NM_001112738,NM_020615	mRNA	29331.9	28640.7	30545.7	33050.7	22032.9	14413.1	4761.28
IVGNm33300	AF110812,AF135595,AK012346,AK145648,AK150802,AK168641,BC002122,NM_013902	mRNA	29235.4	28593.9	25936.6	25471.2	22661.6	18065.2	9670.2
IVGNm06837	AK002254,AK003540,AK004522,BC031539,NM_023172	mRNA	29217.4	33125.3	29339.2	31943.8	24991.7	16583.3	5298.96
IVGNm33263	AF060087,AK088143,AK152915,AK161662,BC086685,NM_011968,U60288	mRNA	28557.4	30947	25467.9	23722.5	14708.3	8298.53	3934.66
IVGNm25749	AF051347,AF097438,AK003429,BC058805,BC061179,BC089464,NM_009052	mRNA	28273.3	31483.2	26200.3	25964	16550.5	6232.83	2523.25
IVGNm01939	AK011599,AK152802,AK160650,BC004627,NM_007484,X80638	mRNA	27842.1	32183.4	26047.8	24144.3	17741.8	11767.1	5414.68
IVGNm23479	AK004678,AK010851,AK010860,AK011051,AK088278,AK131990,AK135473,AK144764,AK146418,AK149505,BC006030,BC013665,BC030502,NM_001113564,NM_001113565,NM_001113566,NM_025814	mRNA	27585.3	29754.9	23888.3	21977.3	14316.1	6406.43	3066.34
IVGNm06120	AK017823,AK150087,AK166621,AK168166,AK168486,AK169178,AK171455,AK171611,BC005784,BC089317,NM_053074,S59342	mRNA	27571.5	27457.3	5182.17	3176.63	2789.09	2912.72	2765.14
IVGNm28651	AK015822	ncRNA	27570.3	30861.1	24460	24705	19632.2	19185.3	19366.1
IVGNm04688	AK077699,AK172657,AK195798,BC052849,NM_001142950,NM_027350	mRNA	27393.5	28519.4	25359.9	24719.4	18717.1	15032.4	7995.19
IVGNm04549	AK005906,AK010094,AK012010,AK013578,AK205555,BC040100,BC083113,NM_025954	mRNA	27274.8	33750.6	20283.8	16263.7	9864.88	5244.16	3429.1
IVGNm31773	AK005231,BC042795,NM_001081005	ncRNA	27261.1	27380.4	18795.8	21095.6	19850	21270.2	24728.1
IVGNm11169	AK008343,AK088016,AK135521,AK141253,AK167682,BC050906,NM_010578,U37029,X15202,Y00769	mRNA	27241	28118.9	25843.6	26693.8	24011.1	24907.8	20611.8
IVGNm11902	BC011413,NR_033622	mRNA	26345.9	35923.7	26262.5	29197.2	27486.9	20677.5	10259.9
IVGNm24583	AK077274,AK077723,AK088013,AK150641,AK150729,AK150870,AK151088,AK151518,AK151887,AK152006,AK152292,AK152341,AK152713,AK167197,AK168129,AK168580,AK192035,AK196211,AK202789,AK205843,AK208229,AK212824,AK214302,AK215325,AK215656,BC004030,BC018161,NM_133668	mRNA	26199.2	30521.4	22880.3	22599.4	18036	8446.43	3719.47
IVGNm04698	AF323953,AK002640,AK128917,AK202020,AK210504,BC004760,BC018574	mRNA	26171.2	35109.6	29441.7	29221.3	25313	26240.4	15890.4
IVGNm22318	AK007696,AK077849,AK088473,AK153055,AK159349,AK167484,AK191725,AK195447,AK196644,AK197189,AK197892,BC003707,BC006020,NM_016906	mRNA	25991.4	29369.5	23750.8	24278.9	16210.8	12527.8	5928.74
IVGNm26619	AK009953,AK010284,AK082925,BC020086,BC058376,NM_001102407,NM_025875	mRNA	25851.2	26089.2	22700.5	19914.8	11431.9	3627.94	2093.21
IVGNm14566	AF318184,AK028681,AK029128,AK031606,AK050958,AK083307,AK088402,AK144894,AK161597,AK161706,AK163275,AK165167,AK166681,AK168579,AK168623,BC005460,NM_010880	mRNA	25749.3	30211.4	25211.8	20827.5	10143.2	4216.95	2579.75
IVGNm31434	AK078543,AK147406,AK159413,BC040384,M26270,NM_009128	mRNA	25658.9	23646.3	19428.1	15837.9	11446	6843.61	3322.82
IVGNm00638	AK077448,AK137044,AK156624,AK161348,AK168265,AK168340,BC008241,NM_008945,U65636	mRNA	25551.9	29217.4	23498.2	21517.3	14710.9	5120.52	1564.03
IVGNm33066	AK011431,AK044933,AK088075,AK146070,AK151336,AK151658,AK151661,AK151869,AK152026,AK152453,AK152455,AK152911,AK153294,AK153371,AK159338,AK159807,AK162426,AK163244,AK166605,AK167828,AK168698,AK168931,AK169042,AK169226,BC002052,BC021768,BC037730,NM_008211,X13605	mRNA	25248.8	26272.3	20962.7	19162.9	10519.6	4810.57	2871.24
IVGNm06947	AF176516,AK007913,AK165600,AK169434,BC024419,NM_027231	mRNA	25220.1	27206	22567.9	22407.1	18732.1	10452.7	3922.65
IVGNm06069	AK004664,BC027638,BC091749,NM_028659	mRNA	25077.9	31430.8	24808.1	26484.8	18372.6	8301.95	4091.92
IVGNm33502	AF354051,AK002376,AK088617,BC016547,BC081431,NM_027862	mRNA	24870	28294.6	24253.1	24791.6	24961.6	17976	8887.89
IVGNm22387	AK088343,AK151598,AK159033,AK181537,AK190142,AK217748,BC002319,BC030739,BC052494,NM_024177	mRNA	24406.2	27294.4	20729.9	17053.1	8361.9	4181.09	2328.42
IVGNm04686	AF087680,AK019157,AK154823,AK165326,AK167842,AK194441,AK195715,AK202343,AK203939,AK207530,AK207811,BC053703,NM_011690	mRNA	24320.9	26649.8	22087.2	20852.9	13662.6	7373.63	3697.07
IVGNm03256	AK087154	ncRNA	24277.2	26783	22067.7	25266	22741.6	30958.5	24891.5
IVGNm11923	AJ249439,AK003847,AK010910,AK089028,AK143470,AK167784,BC026747,NM_015816	mRNA	24225.1	25440.9	24631.6	25416.7	23651.8	24385.8	15381.3
IVGNm23384	AF144101,AK002754,AK005080,AK088888,BC011087,NM_019879	mRNA	24177.4	24264.8	22580.9	20415.5	13902.8	5449.11	1417.03
IVGNm22327	AJ000262,AJ002272,AK138436,AK196068,BC034089,BC053043,NM_010404,NM_177981	mRNA	24135.4	24366.2	24264.5	24076.3	18557	15121.5	9069.26
IVGNm05955	AK002778,AK003372,AK010333,AK088537,AK136797,AK152037,AK214157,AY061808,BC070473,BC083190,NM_025344	mRNA	23574.4	29319.5	21760.2	22229.6	15008.6	6919.76	2924.56
IVGNm04711	AB077209,AB077210,AK077743,AK154246,AK198221,AK203197,AK211100,AK217690,BC025539,BC051494,BC058357,NM_145830,NM_147151	mRNA	23245.5	26038.9	23654.9	22163.9	16626.1	12645.2	9282.32
IVGNm16690	AF465639,AK030768,AK084097,AK135366,AK146205,AK146809,AK177162,AK186456,BC054457,BC088985,M18186,M36829,NM_008302,U89426	mRNA	23179.8	39782.3	31193.8	27728.1	23573.4	19032.2	7489.01
IVGNm24248	AK005031,AK015920,AK146402,AK152255,BC003349,BC019578,NM_016764,U96746	mRNA	22810.8	24795.2	21390.2	22617.2	21321.4	20907.3	23525.8
IVGNm14036	AK144309,BC010654,BC039274,BC040391,BC043034,BC056387,BC057673,BC064810,BC092521,BC127064,NM_001040131,NM_013507,U63323,U76112	mRNA	22795.8	24928.8	23384	26200.8	22661.5	27005.5	23512.3
IVGNm16791	AK010679,AK076015,AK167900,BC022974,M65255,NM_001185182,NM_010385	mRNA	22724.1	26891.8	20345	13179.1	5091.21	3357.51	2760.8
IVGNm22316	AK051711,AK155196,AK155490,AK157002,AK170924,AK170989,AK171190,AK191528,AK200819,AY302242,BC040205,NM_001130529,NM_172941	mRNA	22723.8	20923.6	9185.16	4867.93	3692.56	3410.8	3137.06
IVGNm02812	AF300619,AJ001101,AK010601,AK010746,AK011868,AK169764,BC038075,NM_007573	mRNA	22675.1	22107.7	17417.6	15683.9	10462	6993.21	2847.1
IVGNm22340	AF212372,AK008721,AK033907,AK154353,AK166931,AK190040,AK190512,AK191439,AK191700,AK193883,AK196820,AK197024,AK197950,AK198078,AK198405,AK198611,AK199577,AK200404,AK201947,AK202827,AK202957,AK203042,AK204744,AK206348,AK206437,AK207298,AK209229,AK212991,AK216364,BC002297,BC026854,BC085491,NM_023712	mRNA	21820.5	25431.4	20629.5	18664.5	14522.7	9710.15	5312.16
IVGNm35377	AF224264,AK084867,AK132141,AK139960,AK145582,AK146198,BC011078,BC040827,BC058247,NM_139149	mRNA	21715.4	26423.2	17341.3	15559.2	9070.5	3762.11	2282.01
IVGNm15138	AB015652,AK146368,AK153948,AK168341,BC002187,NM_020569	mRNA	21694.5	22931.5	21438.7	21097.5	18627.6	17876.2	11977.5
IVGNm20059	AK075760,AK078427,AK144740,AK145444,AK146224,AK146301,AK146344,AK146367,AK146593,AK147157,AK151317,AK151528,AK151961,AK153414,AK159810,AK190430,AK210779,AK213115,BC058723,L12693,NM_001109745,NM_001109746,NM_013493,U20326,X63866,Z11870,Z11871	mRNA	21435.5	18065.5	19107.9	14998.3	8878.25	4175.86	1708.46
IVGNm14414	AK008782,AK011551,AK166506,AK167389,AK216545,BC002008,BC053042,BC100543,NM_010634,X70100	mRNA	21022.5	22350.4	19281.3	20976.7	17512.1	13860.9	6980.09
IVGNm06681	AK012344,AK088654,AK143556,BC005680,BC057859,D87910,NM_001029855,NM_011190,U60329	mRNA	20715.2	25179.2	21309.2	21258.5	14783.3	8785.72	4429.1
IVGNm14868	AK087932,AK133859,BC002054,NM_007926,U10118	mRNA	20532.7	20765.4	18945.3	15018.3	7684.95	2922.08	1648.62
IVGNm24440	AK007340,AK008766,AK019134,AK193298,AK199159,BC024944,NM_026631	mRNA	20460.9	21194.6	18421	16929.5	11137.8	5944.66	3147.25
IVGNm32228	AK077537,AK146319,AK187091,AK193542,AK210971,M58761,NM_009225	mRNA	20440.3	21450.3	19204.8	18472.4	14241.1	9050.54	2670.56
IVGNm14704	AF133125,AK028749,AK082890,BC015249,BC025798,NM_019676,U85711	mRNA	19937.8	21922.1	19041.3	22023.8	20453.4	24184.6	20011.1
IVGNm15015	AF549497,AK008241,AK008941,AK150408,AK151144,AK151587,BC003832,BC010774,M37761,NM_011313,X52278,X66449	mRNA	19891	19179.7	16555.4	17773.7	16899.4	17411.2	16995.4
IVGNm24368	AK005185,AK007301,AK012233,AK012714,AK021283,AK030774,AK031113,AK077710,AK090053,AK134827,AK134969,AK165574,AK166629,AK166852,AK187388,AK207164,AK210743,AK217305,BC027284,NM_025437	mRNA	19888.5	16991.5	16615.6	15700.2	8748.23	3025.92	1070.38
IVGNm16117	AK002678,AK003300,BC034787,BC056984,NM_025843	mRNA	19866.2	22587.8	18862	20087.9	17003.5	9623.76	4592.34
IVGNm06513	AK051213,AK077473,AK090029,AK145675,AK146077,AK153990,AK181432,BC003830,BC011493,BC110361,NM_008197	mRNA	19763	21274.6	13149.5	7955.41	2452.74	1904.14	1962.25
IVGNm15150	AF225564,AK005162,AK005376,AK009462,AK011157,AK011209,AK011221,AK011321,AK011388,AK011667,AK011794,AK011856,AK011906,AK011908,AK011918,AK128906,AK144198,AK146081,AK146278,AK152086,AK159573,AK164461,AK168950,AK178794,AK186999,AK189196,AK206271,AK206465,AK213277,AK214491,AY207463,BC003850,BC039926,BC046762,NM_021473	mRNA	19653.2	20871.7	19465.9	19297.1	16503.5	11865.5	5073.51
IVGNm23887	AK012758,AK146238,AK165857,AK182981,AK190167,AK198707,AK198907,AK200032,BC021747,NM_180678	mRNA	19622.6	23204	18429.2	17112.4	10422	4337.49	2242.86
IVGNm20304	AB093241,AK005196,AK014109,AK039156,BC027187,BC058970,BC070413,BC085157,NM_001004359,NM_001005385,NM_026081	mRNA	19596.5	17451	13981.8	8466.64	3504.14	2511.86	1945.41
IVGNm28412	AK078474,AK146269,AK150431,AK151746,AK153364,AK165426,AK167016,AK168971,AK180036,BC003898,BC016097,NM_153064	mRNA	19477.5	21652.4	20008.3	18970.6	13603.7	8945.93	3489.01
IVGNm31565	AK077537,AK146319,AK187091,AK193542,AK210971,M58761,NM_009225	mRNA	19415.9	20711.4	18174.6	17570.4	13358.9	8688.58	2516.71
IVGNm20866	AK088773,AK139289,AK143685,NM_010301	mRNA	19345.3	21566.1	16813.2	16247.7	9842.36	7440.8	3666.4
IVGNm23232	AK005084,AK008357,AK008506,AK076036,AK154084,BC011114,NM_010886,U59509	mRNA	19288.6	22825.8	17089.5	19005.7	17110.9	21252	18446.8
IVGNm23280	AF139894,AK002433,BC004793,BC069915,NM_011865	mRNA	19146.7	16602.7	10497.9	4728.44	1756.57	1752.39	1900.43
IVGNm22364	AK002754,AK005080,AK088888,AK194483,AK209595,AK210494,BC011087	mRNA	19050.9	21087	17317	16154.1	11082.4	4738.85	1436.1
IVGNm22370	AK051425,AK141083,AK145483,AK191787,AK192518,AK193015,AK194996,AK197282,AK200126,AK206138,AK208421,AK211901,AK215174,AK215824,AK219648,BC011069,NM_011049,X69025	mRNA	18858.4	20418.4	17840.6	17931.9	15209.8	15001	9203.61
IVGNm05968	AK007996,AK011089,AK012686,AK018721,BC024343,NM_025628	mRNA	18830.3	22308.1	16658.7	17950.1	17325.9	14345.4	5362.25
IVGNm15104	AF188297,AF271072,AK002896,AK010781,AK012375,AK149955,AK172208,AK183618,AK199438,BC029625,NM_018799	mRNA	18768.2	19552.4	16859	16918.2	12730.1	7909.58	2823.47
IVGNm31549	AK150756,AK152302,AK167622,AK187139,AK218444,BC006882,NM_133705	mRNA	18597.4	21904.2	13973	11097.5	6125	2131.04	925.162
IVGNm22320	AF340231,AF453879,AJ310547,AK075582,AK152056,AK152223,AK159206,AK167477,AK193628,AK204205,BC023299,BC051436,BC086764,NM_053208	mRNA	18519.3	21423.8	13563.3	7515.34	3040.93	1959.62	1564.56
IVGNm08497	AB246709,AB246710,AK163844,NM_001160016,NM_001160017,NM_008142	mRNA	18329.4	17205.2	18434	18387.4	16731.1	16692	8666.09
IVGNm22335	AK004541,AK150090,AK150267,AK152966,AK153337,AK191455,AK200282,AK201007,BC003450,BC046232,NM_001164314,NM_001164488,NM_011710	mRNA	18310	21579.6	17405.4	16913.1	10550	5469.47	2422.64
IVGNm24713	AK003475,AK009874,AK010348,BC006603,NM_175102	mRNA	18083.1	22360.8	14622.7	13973.8	8572.83	4414.15	2690.48
IVGNm16830	AK028265,AK077520,AK132161,AK167647,BC018351,NM_011185,U60824,X80686	mRNA	18075.8	19332.6	17002	15428.1	7653.12	2011.27	722.984
IVGNm23160	AK135462,AK160432,AK161690,AK167914,BC023490,BC058117,NM_009169,U41626,X83589	mRNA	17848.1	21194.1	16598	18160.5	15888.4	14549.2	6916.3
IVGNm17597	AK011621,AK020084,AK159190,BC012217,NM_025573,NR_036616	mRNA	17841.3	21353.2	18444.6	17268.8	10918.5	4856.46	2159.63
IVGNm14742	AB025048,AK089009,AK143609,AK165524,AK165987,AK166856,AK168036,BC054772,NM_021463	mRNA	17774.1	18926.2	15773.6	16312.7	13020.1	10306.1	8653.27
IVGNm32191	AK038677,NM_008561	mRNA	17748.5	20364.6	15782.3	17746.9	13088.9	11188.6	11257.1
IVGNm17092	AK002517,AK151404,BC031664,BC043013,NM_026684	mRNA	17670.8	20323.8	16019.5	16733.9	10987.2	5454.44	2489.77
IVGNm23291	AK076207,AK160459,AK167524,AK167933,BC005552,BC050123,NM_012055,U38940	mRNA	17620.2	19455.8	15895.7	13946.4	8035.31	3552.09	1954.78
IVGNm05126	AK088844,AK143882,AK146831,AK182202,AK190605,AK201864,AK206160,AK208814,AK211782,AK212204,AK217294,BC016400,BC018545,BC106112,NM_010477,X53584,X55023	mRNA	17527.2	18931.7	17211.2	16192.4	12165.3	7976.21	2739.74
IVGNm13921	AK132180,AK158011,AK159283,AK159285,BC042642,BC050014,BC059281,NM_007742,U08020	mRNA	17500.2	21086.9	16204.9	17915.6	15647.3	19968.2	21584.3
IVGNm31557	AF047046,AF108462,AK003447,AK005384,AK007594,AK012218,AK088707,AK134364,AK150400,AK150720,AK150931,AK151089,AK151102,AK151559,AK151644,AK152093,AK152215,AK152416,AK152832,AK159157,AK165946,AK167422,AK168257,AK185769,AK189853,AK198737,BC015274,BC024442,NM_010579	mRNA	17487.4	19578.4	14874.9	10483.3	4252.13	1629.59	1133.23
IVGNm12296	AF099733,AK012119,AK012990,AK035578,AK053472,AK136115,AK151883,AK152862,AK154011,AK167752,AK196373,BC026768,NM_008944,X70303	mRNA	17374.9	19285.3	14213.1	13354.5	8747.72	2807.33	1159.13
IVGNm31564	AK012469,AK076001,AK131618,AK133726,AK150270,AK151196,AK153019,AK159539,AK169181,AK170429,AK190963,AK197314,AK204707,AK204959,BC089335,M26251,NM_011701,X51438	mRNA	17311.5	16494.4	15435.6	13136.4	8947	4824.99	1823.65
IVGNm20064	AK012201,AK077781,AK146902,AK150160,AK166888,AK167367,AK167827,AK167938,AK168087,AK168272,AK169426,BC008255,NM_007638,Z31399	mRNA	17291.1	19668.3	18310.4	17395.8	12613.5	7112.7	2779.68
IVGNm06849	AB085609,AK010029,AK011354,AK078086,AK146158,AK151662,AK151695,AK167681,BC003422,NM_024188	mRNA	17262.9	20507.1	18118.8	18292.3	17695.3	18037.9	12641.9
IVGNm16913	AK078484,BC010766,NM_016755,NR_002690,U77128	mRNA	17226.1	19797.5	15760.9	16565.9	13276.2	8185.29	3818.41
IVGNm04694	AK198699,BC007131	mRNA	17215.2	18784.6	15946.8	13836.3	8271.34	3693.41	1943.29
IVGNm34301	AK004918,AK008203,AK162158,BC015459,NM_025833	mRNA	17168.3	16349.7	16960.8	17321.7	14576.7	15762.7	13164
IVGNm11209	AK012530	ncRNA	17132.3	14167.5	5454.59	2512.65	1574.61	1585.35	1228.03
IVGNm22357	AB028272,AK146657,AK167718,AK168220,AK168291,AK198033,AK208488,AK217546,AK218225,BC012962	mRNA	17130.1	15024.4	2137.73	853.533	754.863	707.601	747.086
IVGNm21052	AK005469,AK031918,AK146885,AK150811,AK151413,AK153550,AK159974,AK160093,AK160827,AK165975,AK168952,AK169090,BC010445,BC011439,J03297,NM_011631	mRNA	17055.2	19451.3	19085.9	18737.6	14390.3	12523.2	4567.07
IVGNm12088	AF124785,AK011124,AK214655,BC004618,NM_010887	mRNA	17026.8	16266.7	15018.3	14855.4	10625.4	6784.7	2755.98
IVGNm23082	AK002402,AK019318,AK166496,BC003807,BC052816,L06465,NM_007748,U08440	mRNA	16968.9	19727.4	15154.4	16337.6	16178.3	17507.4	17197.5
IVGNm32468	AF004565,AF091101,AK003076,AK011407,AK017216,AK077244,AK135438,AK152459,AK153285,AK185914,AK197209,BC019979,BC053693,NM_001159646,NM_023595	mRNA	16944.4	17478.4	15020	14818.9	12559.5	9713.75	4980.62
IVGNm06927	AB049641,AK003283,AK160744,BC027542,BC048498,BC055470,BC060968,NM_026759	mRNA	16910.7	16899.3	14879	14110.6	13035.5	8743.67	5819.19
IVGNm20903	AK003131,AK003322,AK008876,AK010460,AK032774,AK134765,AK153240,AK167943,BC004633.1,BC086922,NM_025551	mRNA,ncRNA	16849.5	18721.9	16223	17110	13886.1	10841.8	4111.99
IVGNm25992	AF312873,AK012528,AK014302,AK051298,AK082942,AK149014,AK198136,BC031357,BC088749,NM_023279	mRNA	16736.9	20530.4	15891.8	10963.8	4201.13	1861.22	1135.07
IVGNm11102	AK003376,AK009771,AK012437,AK155018,AK160507,BC010788,NM_026481	mRNA	16711.6	19035.4	15463.8	15647.8	14861	14063.6	12081.6
IVGNm13657	AK148950,AK149008,AK149239,BC134356	ncRNA	16650.6	15792.1	16763.7	16815.6	15107.6	13004.1	7894.45
IVGNm33705	AK076069,AK165289,AK166644,AK210244,BC023857,BC025552,BC036967,NM_146036	mRNA	16593	17548.8	16193.9	14644.1	11049.5	6684.72	4080.37
IVGNm25264	AF130371,AK153560,AK160263,AY026253,BC080807,BC085166,NM_030886,NM_198010	mRNA	16476.5	16664.4	10220.7	7106.59	2588.71	1474.87	982.049
IVGNm07261	AK003990,AK039949,AK041783,AK084395,AK086633,AK144975,AK159740,AK161378,AK167806,AK168510,AK169066,AK169351,AK177927,AK215615,BC119178,BC119180,NM_178614	mRNA	16407.1	18404.2	19356.1	18876.7	13772.9	8790.05	4531.16
IVGNm23301	AK009591,AK143504,BC005683,NM_013535	mRNA	16375.8	18572.2	15054.2	15982.1	14692.4	12423.9	6923.52
IVGNm02742	AK003243,AK031212,AK165688,BC019836,NM_010517	mRNA	16311.1	19408.1	16646.8	18709.3	15863.4	18661.4	15424.1
IVGNm13023	AK013642,AK083282,AK143524,AK208641,AK210385	mRNA	16251.2	17807.8	16276.6	16387.3	14584.9	13095.3	8854.04
IVGNm23455	AK003137,AK003214,AK012366,BC005760,BC058378,NM_025358	mRNA	16208.5	16422.4	16525.4	14623.9	8964.93	3108.05	1036.29
IVGNm26288	AF027707,AK156243,AK168373,AK171258,BC030069,NM_016778	mRNA	16145.9	17818.2	13927.4	12366.4	8380.53	4960.98	3601.5
IVGNm24129	AF097439,AK132005,BC027529,NM_009749	mRNA	16105.1	18802.2	15889	15503.6	11782.3	5690.2	2783.1
IVGNm02745	AK002381,AK003600,AK007934,AK010272,AK013834,AK019396,AK078417,AK084116,AK160922,AK161289,AK194569,AK216923,NM_026542	mRNA	15902.6	18373.4	15354.7	16929.3	15404.1	13799.9	8028.42
IVGNm14957	AK098082,AK133820,AK134281,BC003800,BC043076,D78646,NM_009968,S70056	mRNA	15877.2	16718.8	14039.4	13413.3	10953.7	9671.82	11671.4
IVGNm27788	AF149291,AF465519,AK019231,AK151576,AK167395,AK167922,AK171088,AK172892,BC009076,BC049861,NM_178598	mRNA	15805	17157.4	16474.9	17193.1	14530.8	10330.2	4259.36
IVGNm20383	AK013192,AK077076,AK152413,BC004839,BC005750,BC063083,NM_001159591,NM_134002	mRNA	15744.9	17143.2	14201.4	13169.7	10072.6	8026.01	5485.95
IVGNm03266	AK088286,AK147098,AK150472,AK159253,BC006760,NM_019661	mRNA	15663	17666.4	15064.9	14756.8	12806.3	11637.1	7172.62
IVGNm33049	AK013106,AK044792,AK088887,AK129022,AK132779,AK135173,AK166045,AK166698,BC046554,BC062916,BC086320,BC108369,BC129873,BC129874,NM_007840,X65627	mRNA	15645.7	14277.4	15099.7	12563.7	6655.2	3427.68	2181.15
IVGNm02027	AK076005,AK171745,BC010765,M32240,NM_008885	mRNA	15625.4	16529	13035.8	12373.7	8573.98	5912.83	2206.54
IVGNm07377	AK009158,AK013761,AK050883,AK148847,BC050937,BC058371,NM_028419	mRNA	15597	17828.1	14973.4	13450.6	10409.7	6227.11	3787.26
IVGNm27791	AK012124,AK019352,AK019437,AK049227,AK049849,AK165008,AK188946,AK208622,AK210360,BC026994,BC060255,NM_026615	mRNA	15585.2	16634.6	14016.7	14140.5	11623.4	12269.9	8610.36
IVGNm34519	BC066053,NM_026696	mRNA	15567.1	16379.1	13627.1	13795.8	10485.9	9916.05	12088.5
IVGNm32738	AK075743,AK082326,AK167017,AK167116,AK211036,BC020044,BC058601,BC094233,BC139336,BC139337,NM_145514	mRNA	15559.1	17160.7	13184.8	11886.2	7508.14	4056.1	2115.45
IVGNm31593	AK002744,AK088463,AK207559,BC012416,BC024673,NM_026703	mRNA	15494.2	17576.5	14358.1	14070.8	11086.6	6433.66	2795.75
IVGNm15201	AK002479,AK003310,BC031492,BC043030,NM_025327	mRNA	15404.9	18644.8	13139.8	13597.2	9932.42	6819.99	5296.44
IVGNm03679	AK004150,NR_027943	ncRNA	15353.4	14855.1	11769.4	11626.8	10904.9	10922.9	11619.1
IVGNm05052	AK008540,AK008576,AK018720,AK020692,AK027906,AK078428,AK145278,AK148753,AM000002,BC028874,EF437365,NM_001037999,NM_007830,X61431	mRNA	15139.5	17259.1	14641.5	15925.1	13958	15114.9	10828.7
IVGNm10444	AK012321,AK012777,AK032673,AK146323,BC011253,NM_010948,X81443,Y15522	mRNA	15060.9	16126.5	17173.1	14353.2	10104.6	5694.26	2742.82
IVGNm18448	AK002948,BC027315,BC087832,NM_026161	mRNA	15045.2	18809.6	16193.7	18261.4	17303	14324.3	24759.6
IVGNm04863	AK090123,AK171001,BC019803,BC037186,BC044058,BC092355,NM_175229	mRNA	15043.1	20835.1	12285.2	9272.46	6049.18	3876.56	3118.99
IVGNm01953	AK043976,AK076572,AK098155,AK146797,AK150426,AK150843,AK151004,AK151128,AK151224,AK151920,AK152054,AK152890,AK153167,AK153282,AK159491,AK159540,AK159758,AK160043,AK164110,AK164193,AK166709,AK166812,AK167159,AK167863,AK168198,AK168369,AK168617,AK168879,AK168890,AK168932,AK169080,AK169084,AK169105,AK169142,AK169300,AK169308,AK169414,AK180293,BC014854,BC020417,BC055892,L01062,NM_007505	mRNA	15042	17006.5	17109.2	16229.7	11730.7	6955.43	2252.32
IVGNm32290	AB041808,AF107848,AF116268,AK078037,AK132636,AK147051,AK159563,AK168996,AK208497,AY519501,AY519502,AY519504,AY682719,BC013824,BC013840,BC034446,BC038067,BC048834,BC061496,BC062654,BC080816,BC092055,BC106133,M13964,NM_001077507,NM_001077510,NM_010309,NM_022000,NM_201616,NM_201618,NR_003258.1,NR_003258.2,S49979,S49980,S79606,Y00703	mRNA	14986.7	17185	18205.9	19569.9	19915.2	22646.6	22511.7
IVGNm32448	AB030185,AJ309569,AK002345,AK003557,AK010191,BC023472,NM_021519	mRNA	14968.9	16247.6	14778	14602.8	12858.1	10606.7	5833.16
IVGNm18193	AK030708,AK089935,BC025522,BC138318,BC138320,NM_175451	mRNA	14770.6	17397.6	8968.84	5049.09	2390.75	1112.22	1109.46
IVGNm30264	AK012825,BC032970	ncRNA	14727.4	11188.3	6310.45	4332.65	2530.86	2450.3	2563.06
IVGNm00743	AB246709,AB246710,AK156101,AK163844,AK180196,AK209108,AK213242,AK217766,AK219535,BC003294,BC013058,NM_001160016,NM_001160017,NM_008142,U29055	mRNA	14703	15904.3	16078.3	17222	12545.7	9201.19	3582.59
IVGNm16953	AF118128,AK051034,AK088867,AK202224,AK202733,AK216397,AY255786,AY255787,BC011067,BC024859,NM_019693	mRNA	14608.9	15758.3	13356.7	12816.5	9839.27	5045.81	3285.49
IVGNm21471	AK027966,AK030332,AK149782,AK160765,NM_001033273	mRNA	14597	13290.6	10678.2	8257.86	5851.24	3864.47	4582.09
IVGNm25152	AJ290947,AK008345,AK008511,AK038457,AK088856,BC024355,BC087919,NM_023211	mRNA	14518	19911.6	15548.1	16253.4	16678.5	13076.2	7278.18
IVGNm22328	AK145117,AK145465,AK146055,AK146453,AK146583,AK146650,AK159786,AK191110,AK192346,AK197170,AK197516,AK214897,BC007132,BC057449,BC058598,BC059849,NM_013676,U88539	mRNA	14481.1	14517.1	12710.1	10387.2	7209.27	4541	2702.53
IVGNm05621	AK012620,AK146328,BC003813,BC092274,NM_007991,Z22593	mRNA	14453.7	15976.4	14901.2	12367.4	7854.4	2178.93	1097.37
IVGNm03303	AK135147,AK147636,M18775,M18776,NM_001038609,NM_010838	mRNA	14419.3	15795.1	13491.2	12871.5	10928.4	8449.25	4667.66
IVGNm19262	AF019662,AK088615,AK146765,AK165563,AK168234,BC008222,BC014752,NM_011969	mRNA	14411.1	17421.6	13866.1	14454	10105.6	5253.93	1741.86
IVGNm24276	AK007840,AK131584,BC024364,NM_019443,Y07708	mRNA	14358.7	17860.5	12977.5	13538.2	14617.7	17487.1	19954.5
IVGNm10837	AK002287,AK008711,AK010688,AK083243,AK145138,AK150797,AK151459,AK151760,AK163984,AK167624,AK169154,BC083348,BC086648,D16142,D21252,NM_011034	mRNA	14280.7	11322.3	13696.8	12559.4	10800.3	9764.19	4300.66
IVGNm00011	AF095936,AK003052,AK003533,AK009660,AK153045,AK169252,AK169839,AK190493,AK196072,BC013509,BC018580,BC051934,DQ403000,NM_023374	mRNA	14270.9	15802.2	13218.8	13513.4	9359.83	5865.37	2103.37
IVGNm13014	AK010599,AK011717,AK012775,AK171121,AK184254,BC003876,BC014770,BC025053,BC029327,NM_001038608,NM_001042408,NM_178604	mRNA	14228.6	14126.4	7849.97	4275.72	1981.25	1333.86	1181.76
IVGNm24561	AB377215,AK015906,AK030607,AK075715,AK076414,AK159110,AY167588,BC033444,BC052382,BC058519,NM_053014	mRNA	14184.2	15926.6	14360.9	15633.6	13166.8	11434.6	7520.75
IVGNm24425	AK008575,AK020291,AK088397,AK145640,AK146300,AK151512,AK178695,AK201001,AK216005,BC010468,CT010203,NM_026438	mRNA	14052.5	14701.9	13533.9	12787.2	8972.29	6230.93	2095.65
IVGNm02750	AK004229,AK145205.1,AK147042,AK150225,AK154866,AK155347,AK155791,AK155842,AK192506,AK197611,AK199655,BC003983,BC011088,BC051952,BC060050,BC063752,NM_001038010,NM_020004	mRNA	13960.4	15516.7	13785.4	10776.7	6996.51	4485.87	2823.67
IVGNm13336	AK032861,AK045884,AK137795,AK161652,AK168355,BC014857,BC025529,NM_146083	mRNA	13953.3	14621.4	8507.77	4309.01	1965.35	1955.65	2108.48
IVGNm04358	AK002868,AK003277,AK008534,AK012254,AK152950,BC056983,NM_026305	mRNA	13941.9	16650.5	13324.6	14251.5	14298.7	14230.4	10951.3
IVGNm20354	AK008901	ncRNA	13883.7	20644.8	16226.6	18993.5	20769.5	20349.5	22770
IVGNm04356	AK149611,AK149755,AK150666,AK150744,AK151068,AK151445,AK151903,AK152633,AK152641,AK152759,AK153037,AK153430,AK165665,AK166828,AK166966,AK167529,BC003809,D90344,M12899,NM_013686	mRNA	13829.1	12271.6	12345.7	10043.2	5363.11	2776.11	1224.79
IVGNm18250	AK031572,AK075838,BC023393,BC024468,BC043714,BC055038,BC064728,BC080731,BC100317,BC132148,BC137953,BC145059,NM_001205081,NM_172570	mRNA	13812.7	15798.6	7743.98	3619.69	1690.53	1374.39	1185.78
IVGNm13697	AK007932,AK028392,AK090070,AK150344,AK151582,AK152051,AK152585,AK152667,AK153517,AK158681,AK159575,AK167244,AK167538,AK167880,AK167981,AK178898,BC014828,NM_031868,U25809	mRNA	13808.7	14691	15268.4	15923.5	14068.7	9740.48	4403.49
IVGNm06661	AK147147,BC059730,BC076501,BC086933,NM_010888,NR_033306	mRNA	13778.1	15514	13189.3	13397.2	13072.9	8180.21	4722.36
IVGNm34508	AK011285,AK012002,AK016960,AK088894,AK137114,AK145927,AK146294,AK149475,AK150997,AK151395,AK152394,AK162752,AK164289,AK167890,AK168079,AK172448,BC020134,NM_197982	mRNA	13756.5	14232.2	12552.7	11718.9	8148.02	4465.67	2257.97
IVGNm17211	AK088809,AK150382,AK150611,AK153509,AK167765,AK168262,AK186702,BC004658,NM_033444	mRNA	13628.2	15696.4	12181.2	11285.8	7480.73	3858.84	1544.36
IVGNm24241	AK003035,BC034662,NM_015740	mRNA	13575.2	14467.5	13545.8	13510.1	11541	10575	6834.83
IVGNm04161	AK081219,AK082788,NM_001033279,NM_001044719	mRNA	13523.6	13555.9	11460.4	9948.64	7399.03	6526.26	3967.66
IVGNm31619	AB030199,AF272044,AF282981,AK014144,AK036377,AK156930,AK181068,AK184077,AK184543,AK184789,AK185815,AK187837,AK188840,AK195066,AK195809,AK199427,AK202316,AK208625,AK209865,AK210908,AK212353,AK214441,AK214627,AK215527,AK218821,BC012952,NM_022417	mRNA	13471.2	15780.1	12810.6	12754.4	12014.8	13686.5	11737
IVGNm27552	AK010183,AK011306,AK011470,AK149705,AY129323,AY129324,AY129325,AY129326,AY129327,AY129328,AY129329,BC003889,BC008093,BC024899,NM_001166589,NM_001166590,NM_001166591,NM_001166592,NM_001166593,NM_001166594,NM_001166595,NM_001166596,NM_181582	mRNA	13467.6	14651.7	15173.7	15660.1	14352.9	11060.1	5734.4
IVGNm35036	AK012102,AK088532,NM_028274	mRNA	13351.1	12131.5	4028.04	2059.3	1515.23	1384.09	1525.98
IVGNm24371	AK009172,AK012280,AK088376,BC025117,NM_025514	mRNA	13300.6	15535.3	13516.7	13364.3	11772.5	8492.38	3873.61
IVGNm31617	AK144229,AK148607,AK159504,AK160634,AK209414,AK213359,BC021638,NM_008562,U35623	mRNA	13299.6	12022.6	4246.81	1915.99	1489.82	1637.07	1491.54
IVGNm06160	AK003078,AK017648,AK017950,AK020143,AK145757,AK146276,AK154026,AK154067,BC012255,BC030171,BC083323,NM_133777	mRNA	13296.4	17465.1	12075.6	12925.1	8621.46	4395.68	1672.36
IVGNm11891	AK032692,AK144601,AK150860,AK152747,AK170433,AK172332,BC002067,M31042,M59821,NM_010499	mRNA	13289.7	8758	2176.72	2053.13	2008.22	2391.26	2773.62
IVGNm14947	AK153367,AK153394,AK156778,AK159390,AK160082,AK162757,AK168738,AK219201,BC002053,FJ692320,NM_001037761,NM_009798,U10406,U10407	mRNA	13276.5	13880.1	15147.8	14781	12259.3	9416.52	4578.94
IVGNm34325	AB100452,AB100453,AK005008,AK011702,AK012787,AK148634,BC002192,NM_024189,NR_028315	mRNA	13246.1	13910.5	11749.5	10876.5	8385.51	7518.78	6133.88
IVGNm34186	AK002662,AK003922,AK028165,AK140279,BC045523,BC061197,NM_175103	mRNA	13204.1	15161.8	11760	12024	11135.8	8704.83	6004.43
IVGNm02132	AK053415,AK169746,NM_008775	mRNA	13199.3	12549	10111.3	7473.46	3144.2	1626.96	948.244
IVGNm16384	AK028118,AK032830,AK133525,AK167572,AK168321,BC003432,BC096645,NM_145615	mRNA	13139.9	12740.4	10463.8	9779.77	6030.16	3186.43	1244.02
IVGNm06018	AK002407,AK013284,AK150293,BC049237,BC069877,NM_026695	mRNA	13096.2	15177.4	12917.2	13273.3	8835.75	4090.82	1787.73
IVGNm05193	AK048243,NM_019484	mRNA	13092.4	14916.9	13210.2	13139.1	7143.51	2827.44	985.311
IVGNm05810	AK003181,AK010579,AK010678,AK011655,AK012234,AK012314,AK012538,AK051243,AK088038,AK143603,AK146165,AK146796,AK148030,AK150479,AK159508,AK160526,AK164077,AK165174,AK166750,AK167210,AK167266,AK168845,AK206775,BC010721,NM_012052,X76772	mRNA	12951.1	14700.1	11606.6	11651.4	9909.85	4748.06	2177.27
IVGNm10264	AF038994,AK011890,AK150821,AK186561,AK188049,AK201273,AK207813,BC013450,BC013620,BC029747,BC031472,BC049977,BC061634,BC106143,M60419,M62867,NM_011732,U33196,U33197,X57621	mRNA	12898.2	17422.4	16858.9	18322.2	16933.6	17815.8	9866.22
IVGNm22292	AK004996,AK031514,AK183461,BC012281,NM_025310	mRNA	12837	14392.8	10164.5	7491.06	3766.15	2162.66	1537.68
IVGNm19456	AK011193,AK220460	mRNA	12822.8	11732.8	8051.88	4424.45	1792.28	1262.1	803.88
IVGNm03009	AK032271	mRNA	12810.7	16549.3	12428.4	15576.2	14393.6	13414.8	19128.9
IVGNm06891	AK002749,AK010988,AK012328,BC048451,NM_025987	mRNA	12798.4	15053.3	11677.3	11878.2	8496.9	5669.94	2671.45
IVGNm24555	AB059617,AK081707,AK141321,BC049771,BC082546,BC138464,BC138465,NM_032396	mRNA	12781.6	15337.6	11897.2	14594	14525.6	11435.7	17494.9
IVGNm04209	AK080778,AK088137,AK089071,AK146567,AK169210,NM_011655	mRNA	12762.5	15922.4	13839.4	12745.9	5792.17	1965.08	1219.46
IVGNm15877	AK088040,AK217455,BC005468,BC010336,NM_010436,X58069	mRNA	12730.4	12650.1	6308.47	3003.58	1216.6	1006.11	1109.49
IVGNm03463	AK052983,AK088169,AK161491,AK165283,AK178249,BC016459,BC027002,BC042187,BC056224,NM_021510,Y14196	mRNA	12705.2	12774.9	13416.4	11883.4	8514.5	6020.73	4398.72
IVGNm24009	AK030231,AK051859,AK135516,AK168054,BC005614,BC024396,M38724,NM_007659,U58633,X16461	mRNA	12665.2	13427.9	10649	8601.99	3880.14	1256.81	628.101
IVGNm03435	AK010427,AK157519,NR_030738	ncRNA	12649	13288.6	9651.47	10873.3	9768.8	11189.6	11096.8
IVGNm34178	AK003263,AK010311,AK011261,AK027907,BC049582,BC052720,BC064310,BC092216,NM_025366	mRNA	12607.5	13261.6	11114.2	8990.56	6014.58	2859.13	1215.94
IVGNm12298	AK035721,BC120588,BC137658,NM_011568,U89876	mRNA	12595.7	13949.3	13899.1	12468.8	6784.13	2722.15	999.808
IVGNm13027	AK013776,AK018348,AK028020,AK045160,AK151265,AK159151,AK167553,AK168016,BC010265,BC020282,BC029180,BC089050,NM_026064	mRNA	12587	12245.9	12149.9	12326.9	11649.5	11973.7	9636.86
IVGNm07132	AK030124,AK075999,AK150631,AK151917,AK154789,AK191741,AK201163,AK202255,BC013625,BC023735,DQ490066,NM_145354	mRNA	12555	13428	13056.2	12192.9	8623.61	5181.15	2308.45
IVGNm23890	AK049735,AK078965,AK089012,BC059107,NM_016806	mRNA	12554.3	12254.5	10403	9843.94	8482.26	7649.6	5448.64
IVGNm28358	AK157857,AK162577	mRNA	12526.4	13414	10300.2	7470.38	3366.42	1234.29	665.954
IVGNm22358	AB017189,AB023409,AK142288,AK148134,AK192451,AK195703,AK195932,AK198312,AK198894,AK200334,AK202910,AK208600,AK208758,AK210325,AK211029,AK212535,AK212850,AK215646,AK217221,AK219374,BC013739,BC026131,NM_011404	mRNA	12525.8	11919.4	12301.4	11879.3	8013.63	4905.3	1817.23
IVGNm12595	AK002757,AK005328,AK028168,AK134816,AK166969,AK168337,BC005712,BC019565,NM_027204	mRNA	12424.6	13496.3	11144.8	8610.16	3979.98	1721.08	876.567
IVGNm09176	AK131583,AK131591,AK131866,AK154943,BC004586,BC006023,X57779,X57780	mRNA	12396.9	10213.7	5747.01	3249.71	1720.91	1093.08	868.243
IVGNm05272	AK010596,AK153386,AK159123,AK159750,BC002203,BC138526,BC138527,NM_027357	mRNA	12359.2	14028.5	11578.2	10207.6	6139.47	2998.45	1777.14
IVGNm02105	AK034817,AK147118,NM_001039351,NM_001039352,NM_001039353,NM_053086	mRNA	12336.3	12342.4	8895.91	6502.92	2824.07	1265.32	804.362
IVGNm04687	AK015150,AK132950,AK195508,BC016207,BC089314,NM_133687	mRNA	12299.1	11479.8	5327.46	1784.09	1029.8	1028.58	997.698
IVGNm17062	AK013521,AK019014,BC030629,NM_026063	mRNA	12296.7	12753.2	12235.3	12435.9	10484.3	6469.97	2993.45
IVGNm32561	AK002744,AK088463,BC012416,BC024673,NM_026703	mRNA	12281	13090.6	11532.1	10820.5	8038.85	4864.37	1896.93
IVGNm06488	AK003473,AK004532,AK006289,AK006891,AK011821,AK017505,BC002162,BC054097,NM_007684,Y12474	mRNA	12226.1	12241.8	10813.5	10805.1	8478.2	6661.09	2908.48
IVGNm16165	AK003299,AK009653,BC023284,BC029622,NM_026760	mRNA	12189	13535.3	12420.5	11055.1	7854.54	4926.92	2347.17
IVGNm24235	AF144702,AK003054,AK009041,AK009152,AK013230,AK088984,BC011436,NM_013895	mRNA	12177.9	12398.2	11988.5	11182.2	8694.73	6207.91	3212.73
IVGNm23463	AK011621,AK020084,AK159190,BC012217,NM_025573,NR_036616	mRNA	12162.8	13321	12453.5	11635.7	6815.56	3108.94	1189.83
IVGNm23685	AK088865,AK168048,AK217223,BC002251,NM_133900	mRNA	12146.7	12143.3	10430	9387.15	6037.35	3386.01	1305.9
IVGNm20287	AF097440,AF187066,AK003294,AK004531,AK010500,AK208231,BC027815,NM_001110233,NM_001110234,NM_009750	mRNA	12102.5	13748.2	11952	11154.3	8785.11	4145.11	2199.77
IVGNm15098	AB025409,AK004101,AK010414,AK011314,AK011782,BC076579,NM_016904	mRNA	12087.7	12307.7	9893.57	9716.85	7510.19	5756.23	2887.29
IVGNm09823	AB037890,AK048521,NM_031179	mRNA	12047.3	12549.2	9947.06	8854.38	4715	2504.78	1491.03
IVGNm22378	AK007528,AK144946,AK150873,AK151941,AK152127,AK157286,AK210107,AK210985,AK214236,AK219549,BC051949,NM_020619	mRNA	12029	12324.3	8066.04	5893.46	3449.46	1762.4	1261.27
IVGNm22337	AF057285,AK155033,AK190940,AK201873,AK206455,AK216437,BC046962,BC067206,BC099682,NM_010147	mRNA	11991.3	12035.5	11701.8	11182.1	9730.02	8324.58	5702.5
IVGNm03494	AK166453,NR_028363	ncRNA	11959.9	14852	11168.9	10647.7	5743.63	2919.9	3325.2
IVGNm04573	AK132114,AK146240,BC130018,D31966,NM_009085	mRNA	11944.8	12163.2	6702.34	3875.77	1523.55	726.569	444.991
IVGNm32412	AK004968,AK018761,AK087923,AK153952,AK161624,AK166778,AK167864,AK167866,AK168221,BC010509,BC046806,NM_019642	mRNA	11924.9	13906.8	12636.9	13682.4	12353	13159.9	10242.2
IVGNm06529	AK002576,AK011436,AK083874,AK088104,AK088269,AK145059,AK146936,AK161650,AK165929,AK181127,BC010252,BC029177,BC039288,NM_008388	mRNA	11848.4	11127.2	9484.58	6469.44	2490.43	822.237	557.28
IVGNm32491	AK002279,AK004372,AK005521,AK013223,AK018562,AK088061,BC025155,NM_025316	mRNA	11807.9	13477.8	11039.5	11680.5	9764.04	6097.73	2203.19
IVGNm30639	AK032172,AK157143,BC049869,BC055866,NM_019402	mRNA	11800.5	12991.2	11548.4	9765.37	6897.98	4943.3	3574.05
IVGNm24979	AK002245,AK010999,AK011019,AK028171,AK150548,AK154833,AK160388,AK191208,AK191913,AK200043,AK201721,AK202661,AK205185,BC086649,NM_008160	mRNA	11794.5	12111	11253.3	10444.1	9766.87	9060.96	6527.38
IVGNm24135	AK010634,AK146242,AK150601,AK152173,AK152665,AK165229,AK167026,AK167262,AK167657,AK167846,AK169339,AK207154,BC054773,L25913,NM_009837,Z31554	mRNA	11793.4	10992.6	9376.6	6772.25	2204.2	761.441	404.868
IVGNm04676	AB025349,AK003025,AK004212,AK010257,AK011079,AK011100,AK012588,AK088896,AK168039,AK182582,AK185753,BC003709,NM_001038231,NM_011793	mRNA	11772.7	11774.5	12022.1	12106.2	10623.5	9186.41	3684.27
IVGNm16086	AK010939,AK018708,AK050550,AK078498,AK145940,BC002153,NM_024219	mRNA	11757.8	12219.5	10658.8	11057.4	10021.9	11742.7	10804.4
IVGNm04700	AF176007,AF192558,AK009623,AK154010,AK179013,AK181789,AK182222,AK191792,AK191954,AK192009,AK192248,AK194435,AK194668,AK196523,AK196870,AK196930,AK197105,AK197332,AK197534,AK197964,AK198074,AK198564,AK199020,AK199094,AK199530,AK199558,AK200252,AK201056,AK201212,AK201278,AK201539,AK203000,AK203399,AK205205,AK205452,AK205989,AK206098,AK206512,AK206937,AK207126,AK207230,AK207280,AK207522,AK208701,AK2…	mRNA	11755	13845.3	12598.3	13938.1	12609.1	10592.8	4347.25
IVGNm09622	AK005339,AK013675,AK046292,AK145979,BC003439,NM_024197	mRNA	11747.9	12382.9	10870.1	10795.6	10350.3	8761.47	4059.44
IVGNm05148	BC026839,BC049606,NM_011070,Y17393	mRNA	11732.9	12959.6	10101.5	9393.61	6158.16	3052.21	2057.05
IVGNm24363	AK003453,AK018773,AK088266,AK146248,AK212934,BC027510,BC094393,BC157909,BC158023,BC172063,NM_025364	mRNA	11728.1	12874.1	11351.2	11352	7880.25	4667.08	1969.47
IVGNm28410	AF142671,AK002944,AK155471,BC004095,BC013619,BC021830,BC035546,NM_020579	mRNA	11671	11596.1	5024.2	2877.14	1979.94	1847.7	1766.57
IVGNm06670	AK006450,AK012297,AK161527.2,AK179099,BC020478,EU604548,L19661,NM_001103165,NM_001103166,NM_001174073,NM_011042,X75947,X97982	mRNA	11662.8	12720.8	11613.9	12883.8	11209.4	12217.2	10794.2
IVGNm22692	AK010854,AK014094,AK018849,AK159788,AK166904,AK166995,AK167396,AK167633,AK167935,AK168670,BC005559,BC083119,NM_025607	mRNA	11649.7	12370.5	10064.9	9668.23	7993.45	6748.33	4826.4
IVGNm32540	AK003580,AK009109,AK168506,BC021588,BC038469,BC060244,NM_026318	mRNA	11591.9	11921.5	11188.5	10402.6	8123.58	5557.04	2729.42
IVGNm05807	AF060088,AJ272019,AK088673,AK137054,AK144784,AK161611,AK162277,AK167689,BC005762,NM_011965	mRNA	11586.2	11573.9	9952.14	8768.02	5894.55	3103.49	1424.05
IVGNm05980	AK003975,AK004492,AK005151,AK007669,AK075856,AK077583,AK088103,AK167377,BC003423,NM_025899	mRNA	11582.8	11712.8	11040.6	10454.6	7665.84	4629.99	1622.06
IVGNm06506	AK150657,AK152571,BC005643,BC069921,L09737,NM_008102,S71373	mRNA	11567.1	13147.2	10293	8779.17	6085.78	2315.65	905.584
IVGNm32522	AK003488,AK008300,AY028425,BC028749,NM_001164215,NM_001164216,NM_001164217,NM_025946	mRNA	11557.4	13887.4	10896.6	11144.3	10288.9	8020.04	4012.44
IVGNm31596	AK005165,AK016436,AK172415,AK209015,BC034875,BC056359,BC058415,NM_025739	mRNA	11521.1	12798.8	8938.31	6426.57	2934.35	1760.27	1423.02
IVGNm05753	AK004637,AK159096,AK159376,AK172007,AK178587,AK180006,AK182384,AK183572,AK184591,AK186457,AK191738,AK195229,AK208324,AK214647,AK219163,AY069968,BC006044,BC006785,BC049097,J03881,M25244,M32015,NM_010684	mRNA	11507.6	10756.1	10847.6	12033.2	11451.9	12327.8	12788.9
IVGNm07015	AK018655,AK047927,AK089715,AK167012,AK187509,AY053393,BC019392,BC050895,NM_029418	mRNA	11470.7	13591.5	11268.1	9652.2	6258.82	2783.54	1057.84
IVGNm05786	AK003092,AK142030,BC003970,BC004754,BC094277,NM_011528,U67611	mRNA	11459.7	13642.6	11061.3	11184.6	8800.33	7167.56	2959.36
IVGNm21312	AK013500,BC145799,NM_001081367	mRNA	11454.8	13221.4	10877.4	10670	8059.06	6457.38	3121.33
IVGNm17089	AK018707,BC056229,BC096421,NM_026610	mRNA	11451.5	15657.1	10822.7	11675.9	8850.34	5210.06	2547.91
IVGNm03667	AK002372,AK003073,AK004150,BC058123,NR_015536,NR_027943	ncRNA	11404.9	12546.7	9867.73	9799.02	9153.52	9452.54	8645.75
IVGNm20958	AK005988,AK011700,AK141272,BC050071,BC147188,BC147189,BC147710,BC147721,NM_001109747	mRNA	11388.4	14859.2	11108.3	11830.4	9503.91	6087.7	3196.62
IVGNm18963	AK002542,AK083043,AK150189,AK151370,AK152018,AK167002,AK167061,AK168263,AK168616,BC005783,D49686,NM_008948	mRNA	11165.5	11912.4	11255.5	9615.4	6169.93	3251.53	1617.51
IVGNm05320	AB221646,AF327568,AF338369,AK036514,AK086122,BC004700,BC019604,BC040794,NM_033563	mRNA	11116.3	9229.85	4450.32	3122.39	2654.57	2064.78	1634.34
IVGNm33576	AK018782,BC038659,BC048499,BC062267,NM_030083	mRNA	11112.9	13343	10449.1	10527.7	8093.39	3332.43	1435.01
IVGNm17117	AK009946,AK182371,AK212003,BC010826,NM_027342	mRNA	11065.4	13606.6	10312.1	10490.7	8266.62	5599.79	1787.03
IVGNm33380	AB041553,AK010521,AK080870,BC052152,BC059809,BC138094,NM_023633	mRNA	11055.2	8453.19	1945.42	1683.25	1575.95	1718.91	1620.65
IVGNm19212	AF311741,AF483486,AF483487,AK002438,AK013676,AK014368,AK131728,AK146333,AK151160,AK153533,AK161856,AK166430,AK212642,BC002072,M59470,NM_009976	mRNA	10964.5	11047.6	10477	10376	10192.5	11358.2	14191.3
IVGNm04685	AK009518,AK010205,AK042146,AK085437,AK141606,AK145125,AK147965,AK154472,AK194136,BC017689,BC023410,BC036982,NM_017376,NM_153484	mRNA	10939.7	11396.4	7871.21	6604.93	5357.03	4432.28	3266.04
IVGNm14724	AF076192,AK076110,AK172644,BC003856,BC054458,NM_019411	mRNA	10908.4	10852.6	8881.98	7340.59	2999.33	1235.36	690.345
IVGNm23507	AK007495,AK010642,AK019008,AK028334,AK216480,BC013510,NM_026612	mRNA	10836.8	14394.1	11119.5	11754.5	11316	7467.25	2581.61
IVGNm22380	AK144437,AK213621,AK214718,AK220566,BC023469,BC027346,NM_010117	mRNA	10804	10594.2	8777.73	7074.04	4904.16	4124.98	3212.47
IVGNm15211	AK009237,AK011085,AK013011,AK135332,BC014799,BC021935,NM_025509	mRNA	10799.5	11145	9531.75	9001.64	6694.86	4590.27	2507.09
IVGNm05916	AK014049,AK146229,AK146602,AK150369,BC005424,BC085308,NM_021884,U52945	mRNA	10781.9	11066.1	9216.51	8080.75	5151.61	2508.55	1399.82
IVGNm15094	AF098508,AK002720,AK003255,AK011840,AK159344,AK182271,AK186128,BC061120,NM_016890	mRNA	10775.7	11280.3	10344.7	9938.86	7891.89	7757.52	4582.41
IVGNm15439	AB049821,AB088411,AB088412,AB207243,AK010646,AK152277,BC013507,NM_001146057,NM_001146058,NM_133348	mRNA	10699.1	11944.3	11642.2	12089.5	10428.8	6685.73	2278.62
IVGNm23426	AF162768,AK002274,AK005378,AK147731,AK148145,AK151911,AK153510,AK157098,AK159371,AK159477,AK167978,AK168774,AK170759,AK171364,AK172124,BC003441,BC010275,BC020404,BC092051,NM_023142	mRNA	10697.8	11962.5	10041.8	10697.6	10684.7	9192.91	5879.47
IVGNm34443	AK004786,AK146299,AK151090,AK153322,AK153369,AK171770,BC055754,NM_001033136	mRNA	10555.6	11890.6	8542.6	6732.55	3490.64	1876.03	980.449
IVGNm11824	AK155277,BC147580,NM_001081212	mRNA	10547.7	8685.34	4089.38	3649.51	3431.11	3088.7	2462.02
IVGNm06685	AK048371,AK049260,AK132021,AK146335,AK151734,AK154114,BC010967,BC039936,J03750,NM_011294	mRNA	10510.8	13266.4	9829.43	9769.22	7424.59	3905.44	2442.6
IVGNm14803	AK146762,BC147062,BC147063,NM_001033305	mRNA	10502.3	11647.7	9998.02	9771.42	8406.7	6343.14	3247.99
IVGNm28507	AF150808,AF193017,AK003323,AK013330,AK029838,AK036866,AK151288,BC017527,NM_016703	mRNA	10349.3	11942.1	8314.59	5590.15	2804.59	2182.11	1937.44
IVGNm15420	AB039919,AK151213,AY197373,BC012273,NM_053075	mRNA	10272.7	9046.52	8307.41	6570.91	3112.51	1220.51	590.526
IVGNm16072	AB009691,AK002665,AK003369,AK003931,AK054045,AK139395,AK150652,AK160228,AK206050,BC038254,NM_023371	mRNA	10234.7	10404	9803.85	8690.87	6322.71	4267.7	1923.74
IVGNm19308	AK021168,AK077250,BC004592,BC078638,BC079848,BC082578,NM_026361,NM_175464	mRNA	10227.8	10467.9	8784.49	7405.17	4878.39	4044.29	2460.08
IVGNm14544	AK013963,AK075699,AK084515,AK088958,AK159092,AK165638,AK184706,BC086667,BC089021,NM_008640,U34259	mRNA	10221.4	9880.41	9265.66	9671.3	8795.52	8910.27	6320.66
IVGNm22338	AF018262,AK179488,AK202110,AK202574,AK205629,BC003744,NM_011155	mRNA	10217.3	11477.7	9484.45	8994.71	7568.57	6602.35	4421.78
IVGNm03346	AK139855	mRNA	10177.4	12186.7	8406.53	8397.67	5643.8	2294	1235.82
IVGNm33065	AK004205,AK013514,BC024625,NM_001159410,NM_008193,U53514	mRNA	10166.3	10334.6	8841.85	8650.71	7359.56	8619.36	9202.96
IVGNm19652	AK010366,AK031878,AK153503,NM_029353	mRNA	10125.9	11237.3	6254.25	3687.45	1296.83	586.385	454.182
IVGNm24980	AB072797,AF045768,AF045769,AF274027,AK006441,AK145770,AK160389,AK160509,AK167881,AK168027,BC083137,BC106147,D87896,NM_001037741,NM_008162,X94483	mRNA	10100.3	11512.1	10843.5	11161.9	10283.7	8623.37	4975.39
IVGNm31560	AK171912,AK190656,AK192008,AK193122,AK196561,AK198029,AK203929,AK204749,BC024559,BC063064,NM_008551	mRNA	10098.8	11246.9	8669.82	7391.11	4243.09	2149.78	1161.79
IVGNm24300	AF186115,AK007914,AK013014,AK013568,AK019927,AK150953,BC008261,NM_019953	mRNA	10090.5	11197.8	8651.2	7360.99	5251.42	2913.74	1599.02
IVGNm16883	AK002428,AK002534,AK012354,AK135435,AK152047,AK167521,AK168082,AK168591,BC010548,BC018173,CT010273,NM_013671,X04972,Z18857	mRNA	10082.1	11102	9590.8	9392.4	8433.28	6249.93	2594.49
IVGNm33433	AB244988,AK003229,AK011253,AK088108,AK132595,AK160544,AK162647,BC013060,NM_025840	mRNA	10077.1	11397.3	9509.76	8662.57	6479.66	3426.5	1516.4
IVGNm17033	AK003027,AK003411,AK007641,AK034936,BC037187,NM_025468	mRNA	10055.8	10898	8726.49	8544.35	6515.83	5539.37	3908.06
IVGNm15242	AK007361,AK008801,AK012550,AK145266,AK147113,BC043139,BC061074,NM_026031	mRNA	10038	9341.57	6696.75	4455.04	2041.95	1050.71	785.489
IVGNm13658	AK077000,AK133040,AK149024,AK161509,AK171653,BC023003,NM_001136086,NM_009468,X87817	mRNA	10010.4	11509.9	11621.4	10970.8	11607.4	9816.29	7322.75
IVGNm18341	AK009868,AK049442,AK150360,AK150787,AK152843,AK167803,AK210532,BC056920,NM_172609	mRNA	10004.7	9974.76	8593.66	7867.5	5253.96	2813.29	1290.61
IVGNm14253	AB221663,AK135572,AK141649,BC138517,NM_008229,U31758	mRNA	9998.7	9625.76	9508.48	7299.35	3814.87	1352.3	699.891
IVGNm17026	AK007610,AK008464,AK013229,AK017760,AK030335,AK134836,AK159669,AK168015,BC024733,NM_025272	mRNA	9967.1	13320.5	9874.04	11198.3	10249.5	9407.94	5979.75
IVGNm15217	AB049645,AK004053,AK011341,AK015199,AK168665,BC039985,NM_025570	mRNA	9965.57	10648.7	8473.71	7443.49	4461.84	2115.5	885.54
IVGNm15841	AB033539,AB033540,AK002350,AK153201,AK189262,BC005667,M11310,NM_009698	mRNA	9954.55	12340.5	8799.17	8877.24	7555.66	5324.63	2495.1
IVGNm12440	AK009481,AK051418,AK164223,AY513272,BC005581,NM_027117	mRNA	9953.6	10636	8613.75	7756.23	4320.26	1949.15	903.109
IVGNm02857	AK003162,AK014286,AK049692,AK082283,AK133377,AK146935,AK148670,AK159249,AK161229,AK192259,BC004638,NM_009242,X04017,X12697	mRNA	9943.48	10995.2	9533.53	9655.15	9613.12	11364.3	14967
IVGNm15339	AK014282,AK147069,AK152630,AK152654,AK157214,AK164989,AK165636,BC094256,NM_027935	mRNA	9830.67	10278.1	10109.8	9760.19	8612.22	8558.89	5906.28
IVGNm10261	AF007862,AF035939,AK011512,BC018176,NM_010760	mRNA	9816.9	9443.03	7349.95	5925.81	3180.03	1102.49	626.972
IVGNm02326	AF241833,BC018613,NM_020270	mRNA	9812.09	10286.1	8559.55	7259.52	4848.57	3368.25	2077.25
IVGNm25836	AK147047,AK147285,AK160825,AK166837,BC023186,BC026672,BC060229,BC079560,NM_001174078,NM_001174079,NM_011417,S68108	mRNA	9782.63	11492.1	9880.14	9660.57	7803.08	6181.74	3234.26
IVGNm19350	AK017822,AK032940,AK088650,AK088677,AK134864,AK141487,AK168828,BC003820,BC106150,L00993,NM_001110145,NM_009278	mRNA	9731.32	8303.84	7649.3	5820.55	2607.93	1094.51	618.252
IVGNm24137	AK003804,AK011871,AK012064,AK013400,AK019380,AK078440,AK146107,AK153465,AK218927,BC031599,BC046336,BC052694,L01640,NM_009870	mRNA	9730.38	11088.4	9299.88	9663.72	7451.01	4810.31	2589.3
IVGNm17019	AK003727,AK031701,AK046544,AK163190,BC002293,BC005797,BC080753,BC100322,BC145522,BC145680,BC145682,NM_024227	mRNA	9722.54	9695.75	9375.97	8707.16	8334.9	6297.78	3834.11
IVGNm12596	AK134899,AK172916	mRNA	9722.09	9620.66	6584.28	4427.84	1678.75	886.366	685.666
IVGNm22345	AK028047,AK205863,BC006844,BC031768,NM_001171026,NM_177614	mRNA	9704.17	10077.2	9369.48	9035.18	7460.01	8530.8	5250.86
IVGNm16328	AK004456,AK209259,BC009145,NM_133976	mRNA	9694.89	10555.1	5313.75	2760.31	1198.3	784.987	906.077
IVGNm27644	AK007593,AK048691,AK075789,AK082985,AK084631,AK211070,BC026486,BC027004,BC071197,NM_001199146,NM_001199147,NM_153410	mRNA	9680.01	10405.7	5874.27	3640.12	1985.48	1490.68	1109.88
IVGNm16054	AF233340,AK005276,AK032168,BC038898,NM_021789	mRNA	9667.8	9611.99	8016.75	6871.88	4811.86	2732.09	1715.45
IVGNm04772	AK007610,AK008464,AK013229,AK017760,AK030335,AK159669,AK168015,BC021529,BC024733,NM_025272	mRNA	9663.87	12085.7	8866.89	9828.83	8969.76	7961.65	5638.69
IVGNm30080	AK018753,AK131578,AK138995,AK165190	ncRNA	9644.9	10451.9	2096.63	888.207	524.208	421.812	440.333
IVGNm25189	AK007892,AK010687,AK011627,AK013134,AK017473,BC005580,BC055278,NM_026329	mRNA	9598.34	11638	8972.08	9264.83	7499.48	5732.44	2176.58
IVGNm22354	AK077602,AK155741,AK159111,AK160045,AK171973,AK208096,AK208812,AK210825,BC049600,NM_013610,U91513	mRNA	9565.69	10255.7	6451.14	3819.18	1924.7	1196.95	855.945
IVGNm23092	AF017153,AK145983,AK146441,AK151015,AK151757,AK167927,AK168835,AK169174,BC003745,BC144759,NM_007839	mRNA	9560.82	9147.98	7927.67	7080.42	4389.63	3205.53	1858.2
IVGNm05160	AF234179,AK010737,AK150529,AK151448,AK165598,AK180435,AK201202,AK209327,AK219078,BC004615,NM_011650,X81464	mRNA	9543.56	10090.6	9152.76	8407.41	6614.12	3725.45	1964.81
IVGNm16071	AF286698,AK002999,AK003012,AK010517,AK012422,BC034899,BC037149,BC055435,NM_023312	mRNA	9531.39	10641.5	9438.13	9834.32	8897.17	5947.26	1994.16
IVGNm33404	AK002375,AK003683,AK151648,BC019535,NM_025323	mRNA	9523.8	8543.1	7315.2	5765.52	2839.93	798.927	498.112
IVGNm10867	AF002718,AK008346,AK011886,AK152389,AK161394,BC012680,NM_007512	mRNA	9505.07	12010.5	9318.92	10196	9940.77	8215.1	5282.19
IVGNm21220	AK003674,AK076498,AK151282,BC131907,BC144745,NM_026778	mRNA	9496.6	9681.15	8493.31	8829.43	7440.9	9583.48	9283.85
IVGNm21216	AB093229,AK003544,AK147538,AK154627,AK213428,BC003293,BC007481,BC031202,BC036274,NM_001159521,NM_138749	mRNA	9456.87	9607.1	8205.32	7750.34	5896	3997.97	1534.95
IVGNm30015	AK131583,AK131591,AK131866,AK154943,BC004586,BC006023,X57779,X57780	mRNA	9364.43	8050.97	4009.07	2212.45	1137.64	735.803	551.995
IVGNm34994	AK010479,BC019405,NM_133928	mRNA	9363.81	11421.1	6210.07	3807.42	1451.37	711.167	504.237
IVGNm07376	AJ250345,AJ278128,AK013744,AK088738,AK176977,BC008164,BC080668,NM_133749	mRNA	9362.52	10622.2	8240.84	7496.37	6290.88	6038.4	4614.62
IVGNm24638	AK049271,BC024143,BC025650,BC089307,NM_001113470,NM_146012	mRNA	9342.25	8660.09	5318.76	3177.93	1612.62	1126.08	771.011
IVGNm28498	AK002604,AK146941,AK151628,AK191866,BC029077,BC059942,BC062178,NM_010312,U34960,U38505	mRNA	9332.36	10702	10740.6	11213	8672.91	6806.1	3273.74
IVGNm25151	AF290973,AF309649,AK077725,AK156914,BC054852,NM_023065	mRNA	9328.91	9619.63	8514.16	8516.88	7021.41	6066.31	4780.55
IVGNm11705	AK013933,AK014737,AK134862,BC020048,BC020089,BC049641,NM_029775	mRNA	9322.86	9227.34	7703.96	5873.19	2665.88	1299.16	741.636
IVGNm06865	AJ252147,AK002343,AK010287,AK178742,AK180723,AK183447,AK206699,BC006869,NM_025550	mRNA	9314.95	9139.07	7130.32	4729.76	1619.25	738.763	590.278
IVGNm23356	AF106967,AK049027,AK080467,BC005677,BC021149,BC095955,NM_018772	mRNA	9300.41	10054.5	7750.16	8609.52	7473.71	6518.29	9005.01
IVGNm29244	AK002782,AK158620,BC010780,NM_028753	mRNA	9296.64	10220.9	2977.17	1082.59	534.566	556.242	593.189
IVGNm27341	AK145507,BC042411	mRNA	9263.24	12485.9	6483.31	6862.63	6959.82	7380.24	11772.9
IVGNm19479	AK013587,AK147291,AK147609,BC067039,NM_001025372,NM_007407	mRNA	9261.47	9181.28	6049.87	4327.7	2875	2194.88	1575.88
IVGNm30116	AK142750,AK144853,AK153747,AK157367,BC020382	mRNA	9257.54	7208.83	2946.94	1281.7	583.293	419.254	464.56
IVGNm20360	AK009645,BC032171,NM_172134	mRNA	9252.47	9700.22	7325.58	6204.21	3499.38	1519.25	733.276
IVGNm11188	AF110769,AK004364,AK004630,AK004771,AK009879,AK150810,AK166997,AK205359,AK210507,AK217063,BC025972,NM_010322	mRNA	9229.21	10349.1	9050	8836.9	6950.43	5016.86	3249.13
IVGNm16814	AK010643,AK088259,BC035274,BC051160,BC051634,NM_010830,U42190	mRNA	9212.36	8772.14	3990.65	1359.41	609.071	569.579	484.867
IVGNm10997	AK132162,BC014809,BC024358,M81086,M87635,NM_009416,X58381	mRNA	9209.83	10588.3	9493.55	9758.38	8533.67	6950.73	4164.21
IVGNm16686	AK011685,AK014253,AK088824,AK146922,AK150081,AK152329,AK166826,AK166892,AK200496,BC020088,NM_008214,U39473	mRNA	9204.83	10210.5	9019.63	8026.81	6562.69	4152.27	2040.84
IVGNm23263	AK131862,BC098498,BC141304.1,NM_011645	mRNA	9199.56	10392.9	8374.63	7517.91	5400.97	6464.85	5749.31
IVGNm24008	AB041570,AK012295,AK075581,AK088145,AK145406,AK166891,BC007470,BC026918,NM_007636,Z31553	mRNA	9197.8	9463.88	9390.46	9220.11	5931.87	3326.49	1251.11
IVGNm32574	AJ505005,AK009584,AK169719,AK220227,BC004769,BC059089,BC067250,NM_001163570,NM_027148	mRNA	9195.4	9972.38	6849.59	4705.55	1968.38	1075.45	971.526
IVGNm16156	AK007492,AK021183,AK088342,AK146803,AK150415,AK153370,AK158783,BC020016,NM_001167921,NM_001167922,NM_026584	mRNA	9194.27	9536.64	7595.43	6316.74	3061.32	1397.9	768.027
IVGNm06562	AK077275,AY158694,AY158695,AY247795,AY247796,BC061161,D84376,L43371,NM_008247,NM_008903	mRNA	9175.51	9607.65	6293.43	3953.9	1559.31	855.114	766.327
IVGNm02408	AK003659,AK149212,BC026538,NM_025285	mRNA	9171.98	9864.17	8815.84	8927.24	8196.21	8572.39	6944.45
IVGNm20397	AB036882,AK013865,AK154535,AK164324,AK164651,BC034719,NM_021565	mRNA	9144.21	8905.02	3090.19	1561.18	1207.66	1213.34	922.213
IVGNm22347	AK046299,AK145031,AK166441,AK206393,AK216472,BC003239,NM_001159328,NM_008244	mRNA	9137.27	9495.04	7565.19	5996.04	4016.67	2217.78	1234.77
IVGNm30930	AK005471,AK018801,AK132290,AK167433,AK167664,AY034577,BC028437,NM_001145799,NM_007796,X15591	mRNA	9115.98	8821.64	8034.74	8169.85	7495.9	8645.83	10950.4
IVGNm17030	AK004039,AK007331,AK148287,AK166497,AK181260,BC031634,NM_025299	mRNA	9107.59	10118.7	8458.09	6912.09	3939.87	2142.79	1194.27
IVGNm06933	AK005098,AK197428,BC023770,BC052790,NM_026890	mRNA	9098.08	9939.14	6535.78	3995.33	1353.25	697.735	463.547
IVGNm26328	AJ566111,AJ566112,AJ566113,AJ566114,AJ566115,AK003665,AK075797,AK146231,AK169926,AK200168,BC125301,BC125636,BC128276,NM_026790,NM_194066,NM_194067,NM_194068,NM_194069	mRNA	9077.18	9963.16	8705.38	8661.73	6113.53	4441.79	2923.05
IVGNm20278	AF051347,AF097438,BC058805,BC061179,BC089464,NM_009052	mRNA	9046.96	9792.89	8323.07	7798.43	4813.4	1971.64	779.295
IVGNm09175	AK018753,AK131578,AK138995,AK165190	ncRNA	9020.4	10084.4	2110.03	962.5	671.988	483.436	546.406
IVGNm32624	BC029173,BC038065,BC087953,NM_029017	mRNA	8982.94	10074.1	5702.33	4142.94	2244.72	1554.86	1255.55
IVGNm04804	AB033370,AF247358,BC029242,BC048481,NM_016723	mRNA	8973.23	10271.5	7404.37	6738.19	3793.46	1782.03	996.777
IVGNm32496	AK005229,AK011036,AK088314,BC028530,NM_025434	mRNA	8949.09	9996.97	7830.65	6706.72	4883.59	1580.17	536.342
IVGNm30638	AK032172,AK157143,BC049869,BC055866,NM_019402	mRNA	8907.7	9418.14	9030.36	7570.97	5291.3	4059.23	2952.32
IVGNm29037	AK075731,AK083179,AK146697,AK165046,AK172913,AK186866,BC018378,D67016,D67017,L40406,NM_013559	mRNA	8906.16	10265.3	9621.73	8616.67	5409.2	2557.94	1172.1
IVGNm21057	AK159942,AK161476,BC059043,NM_001199360	mRNA	8887.22	9230.33	8279.4	7648.8	5467.33	3658.55	1817.06
IVGNm32300	AB221668,AK008264,BC025073,CT010243,M31885,NM_010495,U43884	mRNA	8886.99	7168.85	2502.27	1615.03	1306.79	1198.96	1349.74
IVGNm03590	AK031547,BC038632,BC050969,NM_138949	mRNA	8881.98	8928.45	8436.77	7224.63	5784.4	6634.45	6170.99
IVGNm30728	AK010259,AK012474,AK044120,AK152496,AK152581,AK153383,AK169001,BC004691,BC049282,BC058801,NM_026211	mRNA	8881.86	9152.11	8662.09	7610.5	6024.32	5274.83	2432.11
IVGNm32521	AB100501,AK008279,AK009248,AK153904,BC026508,BC094466,NM_025922	mRNA	8870.91	10488.8	7814.27	7951.37	6064.83	3722.91	1311.95
IVGNm30097	AK140265,AK142736,AK153841	ncRNA	8854.72	16798.4	17383.8	17676	18920.6	20327.2	32348.2
IVGNm35404	AK044451,AK085725,AK150227,AK158139,AK190052,AY223875,BC013261,BC026611,BC033273,BC058620,NM_146217	mRNA	8838.44	10095.8	9062.71	7237.77	4254.86	1665.17	905.039
IVGNm23484	AK010135,AK010300,AK011595,AK160582,AK167631,AK182530,BC023189,NM_025882	mRNA	8836.61	8989.69	7976.92	7189.96	4767.24	3696.28	2166.61
IVGNm00204	AK019424,BC050760,BC065065,NM_018800	mRNA	8802.88	7594.76	7148.12	5862.43	3735.58	2462.39	1623.41
IVGNm04723	AK177321,AK198546,AK217295,AK217616,AK218668,BC003917,BC014287,NM_011822	mRNA	8799.68	9729.57	9217.35	8775.96	7305.2	6155.46	4002.41
IVGNm22070	AK003001,AK138657,AK144777,AK146193,AK150231,AK155254,AK156298,AK157839,BC031542,BC085169,L13791,M94087,NM_009716,X61507	mRNA	8783.93	7941.47	5737.64	3630.3	1501.26	1021.7	1110.93
IVGNm20288	AK003387,AK136365,AK146554,AK154464,BC010321,NM_019803	mRNA	8778.76	9597.9	6539.04	5713.83	3636.51	2432.55	1074.92
IVGNm24369	AF349950,AK007324,AK009146,AK009896,AK017153,AK146152,AK165942,AK168177,BC020037,NM_025443	mRNA	8770.63	8412.2	7547.16	6591.1	3923.92	2030.4	782.258
IVGNm11063	AK030743,AK150733,AK151141,AK151382,AK161646,AK168966,AK169324,AK186857,AK204152,AK210925,AK213278,AK216219,BC009141,BC092058,NM_029157	mRNA	8726.57	9883.19	7228.26	5712.69	2681.15	1060.3	691.408
IVGNm16047	AB041579,AK165981,AK166109,AK170457,AK208935,AK210001,AK217755,BC003949,BC055833,NM_021513	mRNA	8724.15	7467.03	2288.47	1117	920.404	933.848	1173.75
IVGNm33336	AF244951,AK013881,BC031741,NM_019491,Z48587	mRNA	8712.65	10373.5	7467.99	6756.41	4142.26	2107.92	1223.85
IVGNm22404	AF017112,AK051630,AK161119,AK220456,BC156448,BC172699,M74773,NM_009260,NM_175836	mRNA	8702.48	15114.1	11672.2	11347.3	9548.01	6939.19	2888.39
IVGNm14307	AK002634,AK004946,AK030299,AK133501,AK137109,AK145965,AK159791,AK161587,AK165958,AK167856,BC052727,BC057343,D11089,D17556,L06896,NM_010481	mRNA	8697.27	8711.51	8561.97	8623.03	6371.97	4201.73	1575.96
IVGNm04605	AF062526,AK002456,AK083393,AK147192,AK151790,AK153047,AK159992,AK167361,AK170959,AK201025,AK201162,NM_007798,S69034,X54966	mRNA	8692.29	8976.5	8379.26	8184.84	7881.92	8780.18	12336.1
IVGNm31563	AK146446,AK146585,AK146607,AK146691,AK147005,AK158552,AK193176,BC042502,BC096682,NM_001136081,NM_182990	mRNA	8611.16	10044.5	8071.13	7962.95	5813.55	4419.61	2624.6
IVGNm05878	AB025405,AK007449,BC010484,BC057885,NM_019951	mRNA	8578.86	8391.27	7292.57	5675.05	3446.28	2097.41	1201.28
IVGNm12810	AK005989,AK076558,AK133792,AK151008,AK152960,AK165877,AK166111,AK167386,AK168136,AK168279,AK179393,AK211058,AK217964,BC006865,NM_027959	mRNA	8572.44	8713.42	8853.48	8553.1	7894.35	8400.5	7262.5
IVGNm10244	AK009175,NR_029468	ncRNA	8552.42	7686.05	6244.47	6511.84	6262.64	6135.9	5524.59
IVGNm14221	AK002750,AK019317,AK028098,BC008206,NM_010360,U24428	mRNA	8531.18	8365.71	7998.66	8177.68	7888.96	5909.1	2454.87
IVGNm15931	AB010828,AK133989,AK160532,BC005589,NM_011801,Y08219	mRNA	8528.71	8380.83	8071.62	7149.84	4307.91	2258.21	1088.63
IVGNm24136	AK014279,AK133869,AK169613,BC023197,BC026702,BC075622,M58661,NM_009846,X53825	mRNA	8515.88	6981.45	6723.61	5919.69	3890.87	2157.49	1095.8
IVGNm19256	AK011974,AK012013,AK031863,AK078134,AK150280,AK151104,AK151733,BC003742,NM_021526,Y13071	mRNA	8470.06	9069.05	7222.1	5282.19	2277.92	873.676	450.205
IVGNm24408	AK005341,AK006692,AK019453,AK160321,BC011510,NM_026095	mRNA	8454.57	8546.84	7270.38	6137.67	4205.83	1467.23	705.405
IVGNm03285	AK078437,AK132042,AK167123,AK167227,BC013897,NM_008946,U13393	mRNA	8448	9324.46	8614.84	8116.51	4877.44	2085.78	793.105
IVGNm23138	AK002305,AK135162,AK160553,AK167809,BC023482,DQ402950,M16229,NM_008617	mRNA	8445.46	9636.23	8980.39	9160.86	8677.35	6904.56	4399.1
IVGNm26482	AB037370,AK003302,AK083824,AK156758,AK167636,AK168382,AK168471,BC002246,BC023207,BC025041,BC039920,BC052891,BC058524,BC062203,BC085314,BC110679,NM_019817	mRNA	8445.4	8999.42	8054.57	8359.77	6634.21	3282.23	1414.91
IVGNm05242	AK017650,AK169429,BC024342,NM_025677	mRNA	8437.46	8885.31	6560.15	4714.02	1734.56	958.661	1015.15
IVGNm20528	AK019295,AK078121,AK167834,BC043133,BC063105,BC090624,NM_001037846,NM_001037847,NM_028082,NR_024327	mRNA	8412.98	7490.32	3498.62	1513.48	923.6	958.747	867.198
IVGNm24272	AF076192,AK076110,AK172644,BC003856,BC054458,NM_019411,Z67745	mRNA	8398.92	9518.66	7504.25	6190.42	2623.54	1191.45	678.909
IVGNm09599	AB024566,AK009411,AK166962,AK167151,BC052316,NM_015818	mRNA	8391.65	5735.72	2338.58	1248.1	1019.21	1118.31	1023.53
IVGNm15981	AF108214,AK038249,AK168362,BC008511,NM_016876,U70733	mRNA	8342.41	8755.96	8343.71	6652.5	3393.11	1104.73	579.443
IVGNm26086	AF159571,AK144199,AK159242,AK160927,BC067248,NM_011819	mRNA	8331.65	6671.28	1570.51	998.527	694.825	576.416	502.959
IVGNm06917	AK007881,AK010830,AK020433,AK045153,AK082328,AK141416,AK148838,BC009167,BC038677,NM_026474	mRNA	8277.17	8969.83	6181.1	4094.61	2133.95	1336.8	934.83
IVGNm05860	AF172088,AF223953,AK090001,AK150042,AK150507,AK151046,AK151272,AK151507,AK152565,AK152885,AK154355,AK154644,AK163655,AK167872,AK167888,AK167912,AK168172,AK168245,AK169191,AK181744,AK184571,BC010196,BC046792,NM_019419	mRNA	8235.5	10204.4	7748.72	8183.11	7009.59	6295.1	2827.42
IVGNm21202	NM_001113199,U48364	mRNA	8222.24	7441.95	7093.35	4972.29	2137.66	697.251	373.115
IVGNm31575	AK004759,AK169980,AK194318,AK195194,AK196006,AK197384,AK198685,AK205845,BC016662,BC049119,NM_028779	mRNA	8217.09	7972.2	6583.96	5338.86	3630.47	2385.87	1983.88
IVGNm23471	AK011937,AK160190,BC027564,NM_025665	mRNA	8213.58	8039.1	6967.89	5294.44	3075.06	1539	944.789
IVGNm31465	AF225564,AK005162,AK005376,AK009462,AK011157,AK011209,AK011221,AK011321,AK011388,AK011667,AK011794,AK011856,AK011906,AK011908,AK011918,AK128906,AK144198,AK146081,AK146278,AK152086,AK159573,AK164461,AK168950,AK181349,AY207463,BC003850,BC039926,BC046762,NM_021473	mRNA	8210.5	8728.95	8504.17	8324.13	7348.42	5221.7	2271.98
IVGNm02821	AK011714,BC048165,NM_027946	mRNA	8192.58	7839.58	7154.3	5894.54	3305.78	1335.11	722.975
IVGNm05235	AK003026,AK003367,AK010474,AK010604,AK011775,AK017804,AK017824,AK019175,AK019244,AK019249,AK150880,AK160660,BC021304,BC027233,BC068230,NM_001177658,NM_025300,NR_033530	mRNA	8184.13	7785.29	6854.63	4487.14	1908.2	720.973	390.701
IVGNm26346	AF108214,AK038249,AK168362,BC008511,NM_016876,U70733	mRNA	8182.48	8968.5	8032.12	6762.14	3172.55	1120.37	568.603
IVGNm21172	AB017108,AB032477,AB036783,AF241244,AF241245,AK032791,AK122449,BC053018,BC075630,NM_001002272,NM_019548	mRNA	8179.7	7618.52	5454.26	3728.78	2144.97	1618.25	1263.25
IVGNm20673	AK041547,AK084569,AK147603,AK154271,AK159205,BC057560,NM_029770	mRNA	8172.94	9582.34	6066.24	5579.73	3625.48	1974.83	1139.71
IVGNm12997	AK010403	ncRNA	8166.28	8285.42	6493.16	6692.76	6832.68	7113.17	8151.78
IVGNm11205	AK005225,AK008433,AK010653,AK011963,AK014765,AK088280,BC002034,BC081454,BC086783,NM_011563,U20611,U51679,X82067	mRNA	8140.18	9595.79	8003.12	8807.56	8590.14	7488.48	4175.38
IVGNm24354	AK143910,AK153870,AK163242,AK167548,BC033382,BC052480,BC094066,BC147390,BC147391,BC147700,BC147713,NM_024457	mRNA	8119.12	6971.85	7447.44	5083	2488.11	1003.47	534.014
IVGNm05951	AK007438,AK007828,AK012906,AK088838,AK144092,AK147957,BC010718,NM_025301	mRNA	8109.56	8997.89	6729.41	5539.57	3067.44	1267.9	528.625
IVGNm03591	AK010234,AK203234,BC051686,BC094930,BC117029,BC117031,NM_001081168	mRNA	8090.25	9187.92	7297.93	5727.03	3756.9	2526.82	2101.77
IVGNm33047	AK003075,AK008269,AK012068,AK088267,AK168305,BC030406,BC031922,BC058606,BC064074,NM_007763	mRNA	8084.97	8811.77	6960.72	7190.47	7332.26	6939.66	5127.74
IVGNm28682	AK016696	ncRNA	8077.3	8521.06	7696.27	9143.82	8443.18	8714.13	7348.54
IVGNm29417	AK002341,AK135397,AK151724,AK153483,AK154695,AK155110,AK168943,AK170892,AK171023,AK171033,AK178610,AK193811,AK203758,AK204827,BC016619,BC094663,D38379,NM_011099,X97047	mRNA	8070.26	9533	9013.01	9077.39	8256.84	7520.13	5158.14
IVGNm10980	AK002737,AK003442,AK033452,AK144719,AK158165,AK166049,BC011245,NM_025338	mRNA	8043.22	9138.33	7602.36	6971.27	4602.09	2201.84	1087.59
IVGNm24972	AK144284,AK165394,BC031824,BC053692,NM_001166368,NM_008020	mRNA	8037.46	8913.87	7231.62	6936.25	5386.99	3988.2	2125.15
IVGNm23288	AF071315,AK138409,AK146410,AK146775,BC004664,BC014286,NM_012002	mRNA	8028.84	8349.46	8485.92	7818.77	4862.12	2053.33	835.546
IVGNm34400	AK008455,AK008945,AK018769,AK168361,AK168855,BC031607,BC086921,BC100601,NM_026219	mRNA	8005.38	8995.21	7121.67	7071.29	6407.56	3468.15	1500.63
IVGNm10236	AF230385,AF347694,AK007783,AK154028,AK166358,AX775777,BC034104,NM_001161782,NM_053084	mRNA	7975.27	7157.85	3216.85	1218.22	873.367	892.883	810.668
IVGNm04822	AK011338,AK079294,AK079442,AK152910,AK164451,BC012249,BC027069,BC027758,BC031802,BC038378,BC096036,NM_001040187,NM_152806,NM_199080	mRNA	7968.12	8238.46	7119.46	6457.07	4950.63	3626.2	2506.79
IVGNm21260	AK006556,AK141750,AK204288,BC019552,BC054750,BC059239,BC060234,BC065102,NM_016714	mRNA	7966.36	5969.76	1536.98	664.632	476.824	422.242	372.942
IVGNm01792	AK028182,AK088616,AK132766,AK209394,BC069898,NM_030254	mRNA	7964.5	7813.88	7643.77	7648.52	6997.18	7436.35	5360.96
IVGNm34710	AK009324,AK146707,AK211403,AK215130,AY112699,BC030044,BC051487,BC060966,BC082275,NM_027315	mRNA	7959.92	8559.81	7150.39	6613.1	5275.58	4271.65	2682.38
IVGNm14722	AK007932,AK028392,AK090070,AK150344,AK151582,AK152051,AK152585,AK152667,AK153517,AK158681,AK159575,AK167244,AK167538,AK167880,AK167981,AK182655,AK190406,AK199307,AK212825,AK218442,BC014828,NM_031868,U25809	mRNA	7918.27	8673.45	8221.95	8986.98	7552.99	5470.09	2572.75
IVGNm04728	AK011521,AK133911,AK145343,AK159848,AK163866,AK166670,AK168347,AK169101,AK171892,AK178014,AK219463,AK220299,BC005758,BC017539,BC035525,BC054785,BC065172,NM_001109913,NM_029804	mRNA	7913.17	8556.33	7684.3	6563.42	3624.65	1845.21	878.523
IVGNm30011	AK131583,AK131589,AK131591,AK131866,AK154943,BC004586,BC006023,X57779,X57780	mRNA	7909.62	5641.59	2531.22	1021.7	517.232	291.249	267.87
IVGNm22390	AK154615,AK204108,AK210492,AK217972,BC004025,BC022667,BC066805,BC080283,NM_001039878,NM_133789	mRNA	7862.83	8494.74	7135.3	6375.58	4023.41	2529.75	1303.45
IVGNm24262	AF062482,AK007798,AK013183,AK013261,AK018790,AK145350,AK154728,AK189778,BC116885,BC116889,NM_017472	mRNA	7845.95	8696.71	8551.2	8453.82	6993.91	3343.56	1158.16
IVGNm07061	AK010256,AK011146,AK031064,AK152945,AK153314,AK166693,AK167597,AK168969,BC004621,BC055371,BC060176,NM_033074	mRNA	7845.32	8201.23	7349.29	6109.67	3486.27	1746.85	1109.24
IVGNm14951	AK089548,AK146360,AK154043,AK156836,AK158223,AK158254,AK158272,AK161630,AK168052,AK171160,BC054776,BC139465,BC139467,NM_009836,Z31556	mRNA	7813.77	7913.76	7978.35	7457.92	5012.6	1923.44	592.251
IVGNm05722	AF053770,AF080580,AF098949,AK158380,BC028276,BC038681,NM_009940	mRNA	7813.43	8664.17	6855.94	6160.48	4207.73	2076.64	756.455
IVGNm32230	AK019310,AK156845,AK167821,AK168144,BC021537,M29264,NM_009273	mRNA	7802.75	7818.7	6911.84	7156.53	5833.28	6380.35	4207.55
IVGNm33458	AJ344103,AK004219,AK007595,AK013103,AK076425,AK169882,BC030344,NM_026559	mRNA	7784.11	8815.05	7253.27	6817.31	5616.09	4771.96	2923.02
IVGNm22923	AK002397,AK139942,AY082613,BC002040,NM_018854,U38981	mRNA	7763.47	8456.62	6630.77	6273.09	4780.18	2909.84	1522.01
IVGNm08931	AK129007,AK151237,AK168914	mRNA	7755.53	7931.51	7324.54	6608.79	5513.32	3939.21	2781.01
IVGNm23575	AK148605,BC024998,BC043043,NM_029278	mRNA	7752.61	8531.68	5290.99	3314.37	1344.61	966.223	714.44
IVGNm05738	AF120162,AF252856,AK008559,AK009726,AK046109,AK150681,AK170289,BC008242,NM_010261	mRNA	7698.83	8226.89	7458.28	7438.24	6591.53	4825.97	3405.66
IVGNm34587	AK004382,AK021268,NM_001142727	mRNA	7677.28	9001.95	7503.1	6926.07	5778	4091.6	3153.99
IVGNm26629	AJ289242,AK030237,AK077839,AK145322,AK150044,AK182840,AK186041,AK187645,AK188747,BC013616,BC027032,BC087554,NM_021895	mRNA	7647.96	8640.1	8201.41	8417.67	7666.7	6843.85	4576.31
IVGNm32708	AF315511,BC013093,BC031772,NM_138591	mRNA	7625.24	8548.55	7274.07	7006.7	5289.22	3242.22	1071.11
IVGNm10265	AK011923,AK171025,NM_001164051	mRNA	7604.76	8492.96	6633.03	8507.74	7921.81	7188.67	11432.1
IVGNm03312	AK136332,AK168281,BC005711,NM_144829	mRNA	7604.48	8332.82	7162.4	6094.87	3639.74	1589.05	774.637
IVGNm21053	AK011456,AK088557,AK089063,AK133878,AK160831,AK169632,BC089544,D13544,J04620,NM_008921	mRNA	7597.03	7816.6	6469.9	5316.41	3142.81	1990.27	1554
IVGNm13878	AK077487,AK077489,AK133629,AK133739,AK133786,AK158857,BC014736,NM_007694,X51429,X53028	mRNA	7556.39	9147.07	9049.15	8305.12	8285.13	7208.63	4487.09
IVGNm23959	AK079110,AK088741,AK129071,AK149724,AK150017,AK161608,AK161692,BC029682,BC032973,BC034300,BC086624,NM_001025392,NM_001025393,NM_153787	mRNA	7539.95	8024.29	5852.38	3744.83	1868.21	1744.68	1655.67
IVGNm08132	AK004845,AK028697,AK145025,AK159945,AK167616,AK169399,AK173126,AK216925,BC033445,BC039775,BC043040,BC054417,NM_133797	mRNA	7535.27	7765.93	7422.19	7306.31	6655.04	7190	7096.69
IVGNm21222	AF287293,AK003833,AK045256,AK046496,AK080221,AK154676,AK158718,AK169341,BC021361,NM_134093	mRNA	7516.86	8154.29	6709.99	6007.46	4781.98	4098.64	3363.31
IVGNm13371	AK036616,AK043166,AK051045,NR_002896.1,NR_002896.2	ncRNA	7510.14	7234.71	5755.02	5868.34	6360.92	6265.49	8525.57
IVGNm33886	BC139233,BC139269,NM_001024842	mRNA	7498.62	9147.06	7385.61	8296.54	9084.11	6590.54	12299.4
IVGNm10097	AJ250193,AK009082,AK150985,BC022587,BC051936,BC069980,BC116437,NM_023514	mRNA	7497.69	7747.53	6241.37	5278.68	3294.2	1876.18	1212.84
IVGNm25927	AK146482,AK150374,AK151588,AK152007,AK152970,AK159098,AK159636,AK159756,AK159815,AK166816,AK167326,AK167774,AK167786,AK167909,AK167995,AK168131,AK168398,AK168543,AK169867,BC021508,BC023049,BC024058,BC024830,BC027388,BC027767,BC027822,BC028851,BC031128,BC033325,NM_134101,NR_027485	mRNA	7488.65	8604.47	8985.1	8845.31	7041.79	4413.29	1664.79
IVGNm14838	AK002790,AK076507,AK146949,AK159803,BC062879,BC090978,M84147,NM_007410	mRNA	7472.12	8984.46	6789.59	6015.25	3802.4	1830.11	666.971
IVGNm16947	AF051150,AF216310,AK052309,AK078770,AK165036,BC120773,BC131947,NM_019517	mRNA	7460.22	8695.58	7848.58	8047.8	7821.18	6325.8	4001.32
IVGNm16098	AK002292,AK004031,AK010553,AK013128,AK151764,AK160337,AK167911,AK168218,AK178594,AK179194,AK183354,AK183917,AK189225,AK212551,AK214273,AK215619,BC018405,BC022926,BC040094,NM_025407	mRNA	7453.48	8296.21	7827.96	7783.65	5995.42	3494.91	1296.35
IVGNm20119	AK008638,AK010401,AK082934,AK160286,AK166065,BC089012,NM_019499	mRNA	7440.73	7699.57	6585.68	5812.91	4300.6	2989.27	2245.47
IVGNm31559	AB041607,AK080419,AK087524,AK173124,AK190306,AK194574,AK210443,AK215275,BC004762,NM_021393	mRNA	7428.75	7870.98	6126.18	5370.49	3865.16	2503.11	1369.57
IVGNm05036	AF068116,AK017221,AK018516,AK032965,AK076067,AK138055,AK150495,BC028903,BC045153,BC049077,NM_001039169,NM_001039170,NM_023314,U01137	mRNA	7416.62	8180.71	7468.75	5392.98	1817.85	613.449	416.96
IVGNm16164	AK003830,BC055880,NM_026753	mRNA	7407.01	8737.81	6780.84	6939.9	5970.86	4428.09	2740.62
IVGNm26078	AB020983,AK087934,AK132471,AK145576,AK145790,AK145967,AK146254,AK146599,AK146756,AK146938,BC012957,NM_001080793,NM_011791	mRNA	7405.05	7814.64	7228.95	5960.93	3543.09	1960.9	1081.94
IVGNm35324	AK010415,AK080517,AK139174,BC024802,BC096675,NM_146183	mRNA	7399.36	8974.19	5752.81	3905.56	1668.03	973.312	808.205
IVGNm06941	AB011473,AF108357,AK004438,AK005682,AK028206,AK145883,AK211903,BC026920,NM_027044	mRNA	7387.62	6675.42	7261.86	6793.13	6020.56	5332.59	4345.67
IVGNm34315	AK010346,AK013956,AK084373,AK149832,AK163342,AK167749,BC021756,NM_001093759,NM_001093760,NM_025879	mRNA	7376.28	8095.09	5985.72	4797.51	2376.49	1496.57	950.2
IVGNm25340	AK015468,AK150442,AK159708,AK172428,BC006701,NM_146093	mRNA	7372.83	8636.93	8633.6	7628.68	4947.33	2460.32	1468.98
IVGNm05257	AK011757,AK011958,AK012909,AK013089,AK039746,BC009104,BC028545,NM_026456	mRNA	7372.37	8056.11	5888.84	5305.65	3531.38	3201.16	3093.51
IVGNm16446	AK078099,BC064035,BC141278,NM_172762	mRNA	7367.35	7069.63	5325.41	3450.06	1609.7	878.161	488.891
IVGNm22386	AK088147,AK145534,AK145702,AK148189,AK149579,AK164167,AK164717,AK180590,AK181005,AK181362,AK188726,AK190375,AK191171,AK192204,AK195882,AK196609,AK197491,AK199725,AK200189,AK201700,AK203698,AK204426,AK204652,AK205584,AK205699,AK210807,AK214745,AK215918,AK216205,AK217341,AK217408,BC011304,BC034515,NM_011421,Z14252	mRNA	7347.55	7960.67	5889.44	4691.07	3017.81	1959.01	971.805
IVGNm03565	AK037196,AK136538,BC012276,BC025628,BC029714,BC034710,BC062912,NM_001035226,NM_134014	mRNA	7324.81	6786.74	5754.53	4230.43	2145.09	1493.64	1066.17
IVGNm22465	AB025966,AB093227,AK017415,AY772010,AY929611,BC004007,BC011391,BC017642,BC054372,BC060979,BC079665,DQ097265,NM_021523	mRNA	7323.01	7215.77	6068.58	5879.07	4240.47	2813.36	1551.13
IVGNm02146	AK035288,AK135001	mRNA,ncRNA	7314.51	7249.62	5307.91	3531.48	1331.38	793.975	612.903
IVGNm15316	AK010079,AK162073,AK171079,BC028802,BC056165,BC089369,NM_027371	mRNA	7308.09	7256.63	4424.16	2271.37	756.119	485.8	333.54
IVGNm10253	AK010192,AK129036,BC055923,NM_053272	mRNA	7303.95	8037.94	5759.18	4381.74	2085.48	1057.39	512.234
IVGNm30272	AB009291,AK014338,AK131997,AK165646,AK167580,AK176996,AK186239,BC022761,BC038901,BC048616,NM_029103	mRNA	7292.05	8111.77	6484.93	6474.17	4557.32	3511.5	1623.27
IVGNm03090	AK043494,AK084714,AK151228,AK151839,BC009092,BC055921,NM_026313	mRNA	7283.38	6649.29	4300.6	2024.67	1200.91	1025.15	977.253
IVGNm19255	AK007676,AK029463,AK031873,AK049129,AK078776,AK144710,AK152311,AK159115,AK159904,AK167362,AK169545,AK169786,BC002242,NM_001199188,NM_024225	mRNA	7267.79	6680.48	5396.37	4638.56	3158.62	2058.96	1344.05
IVGNm16251	AK003393,AK010065,AK032787,AK047951,AK117103,AK146717,AK150618,AK151304,AK152353,AK153459,AK158646,AK159051,AK159666,AK160054,AK164038,AK167822,AK168034,AK168049,AK168149,AK169152,BC034273,BC049956,BC052208,NM_029573	mRNA	7254.61	6532.87	7384.14	6067.04	4436.47	2695.67	1015.91
IVGNm04692	AK012494,AK089037,AK178375,AK197995,BC022691,BC038147,BC039644,BC050929,NM_028301	mRNA	7214.8	7738.59	6350.02	5844.31	4560.56	3731.25	2943.98
IVGNm28880	AB049651,AK002421,AK008431,AK021173,AK041771,AK167883,BC006029,BC037363,BC051471,BC055724,BC059722,NM_025796	mRNA	7126.05	7576.26	6597.14	6792.34	5948.3	4715.51	2279.76
IVGNm12552	AK088176,AK134899,AK148903,AK172916	mRNA	7113.17	7414.18	5726.03	4846.07	2904.15	1454.9	767.068
IVGNm09590	AK007667,AK029090,AK080437,AK145962,AK159252,AK169779,AK188612,AK193333,AK199117,AK200010,AK210625,AK212946,AK217373,BC013714,BC028815,NM_026977	mRNA	7104.87	7528.65	5106.6	3074.98	1655.95	1203.42	970.602
IVGNm23443	AF459789,AK016595,BC058859,NM_023729	mRNA	7088.22	6676.07	6121.67	5463.04	3546.66	2467.18	1653.64
IVGNm33603	AK013058,AK020203,BC003938,BC030490,NM_033568	mRNA	7086.72	8209.81	7712.39	7791.57	6458.17	4720.34	3325.85
IVGNm23062	AB074758,AK010603,AK029146,AK139791,AK146162,AK149356,AK167644,AK169854,AK184321,AK202218,AK208012,BC003421,BC055438,NM_007510	mRNA	7084.88	6481.02	6629.1	6349.87	5587.48	5814.41	3171.36
IVGNm11942	AK003180,AK013754,AK045397,AK050274,AK075728,AK076151,AK088602,AK089964,AK122430,AK148082,AK161627,AK202537,BC016130,BC046768,NM_001037877,NM_025804,U94988	mRNA	7083.63	8311.54	7874.09	8273.19	6541.87	4602.07	1977.45
IVGNm17075	AK003104,AK008680,AK010150,AK089039,BC011425,NM_026310	mRNA	7065.75	6993.55	5465.49	4092.67	2478.03	1326.78	1030.77
IVGNm09074	AK003573,NR_024067	ncRNA	7056.26	8285.69	4864.42	5031.95	5202.21	5003.71	6076.38
IVGNm02854	AK014236,AK018633,AK167527,BC035544,BC079897,NM_001003908	mRNA	7039.17	6674.58	6132.48	5221.7	2984.58	1155.36	418.539
IVGNm03419	AK021267,AK155105,AK168110,BC028539,BC147293,BC147294,BC147741,BC147751,NM_029938	mRNA	7029.17	7347.51	6229.06	6064.88	4828.3	3292.81	1360.61
IVGNm23376	AB578899,AB578900,AB578901,AF193794,AK004103,AK008248,AK036426,AK150330,BC005663,NM_019780	mRNA	7024.39	7943.47	6728.61	5694.97	3792.04	1813.28	793.825
IVGNm05929	AF110764,AK003643,AK010508,AK010606,BC004623,NM_023203	mRNA	6989.38	8551.31	7592.75	7508.96	6835.66	3982.05	1662.13
IVGNm15831	AK081808,AK088057,AK088528,AK143416,AK171667,AK182461,AK188980,AK194752,AK205991,AK211490,AK211788,BC058630,BC138200,BC145984,D10576,NM_001136085,NM_009457,X62580	mRNA	6970.86	8077.79	7449.29	7765.09	5719.27	2953.86	1345.18
IVGNm22333	AK002699,AK003997,AK084026,AK087422,AK166900,AK170441,AK198749,BC003338,NM_011876	mRNA	6955.01	8184.48	5558.08	4642.07	2781.34	1130.4	462.018
IVGNm15387	AF116911,AK003252,AK014184,AK050162,AK145644,AK159761,AK166772,AK167058,AK177231,AX775905,BC002164,BC014732,BC018379,BC045145,BC058273,NM_029565	mRNA	6888.85	6910.57	6864.05	6782.63	5926.23	6021.95	4720.08
IVGNm10906	AB041555,AK003799,AK012363,AK028145,AK029529,AK150024,AK150665,AK152736,AK160993,AK169598,AK169760,AK178549,AK187384,AK199011,BC043057,BC046231,BC054728,BC056986,NM_023665	mRNA	6884.54	6056.08	5969.84	5361.41	5965.46	6800.58	8771.29
IVGNm25100	AB014721,AF129931,AK088341,BC028823,BC051394,NM_016882	mRNA	6870.22	7068.83	6294.25	5012.66	2846.84	1397.47	959.952
IVGNm03680	AK004175,AK159389,AK164932,AK169795,AK199818,BC015260,NM_010220	mRNA	6857.25	6830.09	5669.2	4550.42	2630.57	1206.67	572.926
IVGNm21135	AK010567,AK015823,AK088610,AK132109,AK144668,AK145201,BC005599,BC026842,BC037681,BC045521,NM_025554	mRNA	6855.14	7675.48	6797.18	6208.28	4470.18	2852.9	1456.52
IVGNm22382	AK011396,AK084520,AK156589,AK182039,AK194862,AK196994,AK203424,AK203871,AK209403,AK211696,AK216241,AK219844,BC032215,BC052199,NM_146216	mRNA	6852.49	6966.1	5965.19	5268.19	3832.69	2173.43	1269.57
IVGNm03677	AK003921,AK122418,BC029990,NM_178880	mRNA	6826.59	6000	4209.62	2445.45	1418.72	1192.88	768.448
IVGNm06163	AK077341,AK079167,AK088461,AK146916,AK151836,AK158665,AK160070,AK169290,AY535001,BC017637,BC025810,NM_133831	mRNA	6815.3	8423.4	6183.75	5462.03	3798.39	3443.25	2719.35
IVGNm22123	AB055070,AK028319,AK049645,AK160114,AK169212,BC011289,BC040822,BC049621,BC058797,NM_001168471,NM_001168472,NM_026556	mRNA	6786.38	8875.72	6042.81	6084.03	5063.64	3718.05	2099.78
IVGNm01606	AK013929,AK088692,AK151000,AK180439,AK186331,AK189364,AK215240,BC009148,BC011286,BC027372,BC039917,BC057928,BC085484,NM_133693	mRNA	6785.43	7963.55	6026.52	4630.51	2452.63	877.778	570.475
IVGNm27254	AK013425,AK160556,BC028648,BC060290,BC061183,NM_028358,NM_212468	mRNA	6776.49	7060.66	5625.35	4646.77	3028.22	2627.8	2985.71
IVGNm10714	AK088775,AK145341,BC071232,BC094380,NM_008017,U42385	mRNA	6774.64	6102.5	5603.11	4262.58	2390.67	1191.23	638.96
IVGNm22317	AK150289,AK154712,AK159401,AK191563,AK196729,BC004677,NM_026609	mRNA	6774.08	6806.32	5183.16	4445.57	2776.45	1613.9	834.417
IVGNm21655	AK081195,AK168297,BC046963,BC096639,BC100666,NM_001003918	mRNA	6768.89	6742.68	4499.99	3024.89	1319.79	949.14	740.325
IVGNm03405	AK005114,AK007619,AK007680,AK008646,AK009969,AK017843,AK150910,AK151242,AK152041,AK152240,AK160283,AK162779,AK167236,AK209461,BC004694,NM_025894	mRNA	6744.11	6325.58	5268.37	3370.88	1576.28	788.169	500.865
IVGNm03561	AK010505,AK012294,AK135451,AK145703,BC004052,BC030840,NM_008950,Z54219	mRNA	6734.18	6499.42	7190.39	5083	3155.72	1362.5	880.264
IVGNm11516	AK048129	ncRNA	6709.66	5997.58	5111.47	4669.23	3512.61	2968.64	3179.48
IVGNm15107	AK003174,AK004619,AK046430,AK147150,AK149998,AK150391,AK150501,AK150624,AK152539,AK152646,AK152846,AK153295,AK161221,AK167858,AK185150,AK187010,AK210233,AK216120,AK218054,BC015302,BC094020,D13181,D14850,DQ832702,DQ832703,NM_001002011,NM_001111102,NM_019390,X14170	mRNA	6696.15	8147.11	6886.95	5671.9	2832.57	1036.52	544.655
IVGNm14038	AK087932,AK133859,BC002054,NM_007926,U10118	mRNA	6694.7	6227.42	6068.67	4516.5	2284.5	799.353	398.713
IVGNm24027	AK014366,AK019460,AK034755,AK049743,AK147103,AK150345,AK151625,AK153276,BC068226,NM_007968,X79233	mRNA	6676.29	7252.22	6999.06	5949.91	3816.08	2612.86	1763.31
IVGNm23466	AB049960,AK007256,AK007615,AK010268,AK011966,AK012126,AK012524,AK076130,AK206615,BC021535,BC094621,BC100602,NM_025595	mRNA	6659.45	6780.24	4898.26	3300.68	1543.24	793.751	611.273
IVGNm25090	AF119498,AK086863,AK164029,AK206446,AK209189,BC019440,BC092256,NM_013859	mRNA	6628.61	7336.33	2727.89	1206.95	627.361	555.453	573.409
IVGNm25029	AF030433,AK141693,AK144119,BC050189,NM_010051	mRNA	6617.27	4696.66	1300.9	721.119	538.737	407.543	469.064
IVGNm20832	AK014228,AK046804,AK084749,AK148109,AK165324,AK166364,AK170375,AK186390,AK187291,BC034206,BC052094,NM_175195	mRNA	6587.07	6255.5	4387.44	3205.66	2088.21	1699.23	1273.65
IVGNm10075	AF027707,AK156243,AK168373,AK171258,BC030069,NM_016778	mRNA	6582.28	6585.52	6498.09	5525.93	3793.77	2384.56	1485.36
IVGNm24068	AK002395,AK002404,AK005237,AK008270,AK164785,AK168545,BC050940,M29462,NM_008618	mRNA	6574.75	7051.8	6123.4	6284.52	5147.43	4014.83	1478.97
IVGNm07206	AB233218,AK010954,AK075974,BC038691,BC050115,BC065381,NM_175109	mRNA	6563.37	8147.91	5308.06	3538.94	1410.79	551.464	366.176
IVGNm26297	AB041882,AK003838,AK076121,AK217474,BC006754,BC020099,NM_023209	mRNA	6547.71	6662.36	5657.23	5143.05	2857.83	1285.32	777.25
IVGNm06531	AB030203,AB030204,AK002599,AK003224,AK003587,AK003928,AK005125,AK076139,AK077482,AK088270,AK150378,AK150396,AK151714,AK151889,AK152068,AK152516,AK152650,AK152731,AK152983,AK153103,AK159307,AK159340,AK159378,AK159426,AK159619,AK159628,AK159792,AK159962,AK160101,AK160725,AK200695,AK210559,BC004731,BC010320,BC021786,BC064434,NM_008410,U76253	mRNA	6547.26	6297.96	5873.61	5849.76	5293.28	5179.42	3840.31
IVGNm06586	AF195533,AK002627,AK012794,AK030446,AK140965,AK144146,AK145677,AK146157,AK150139,AK150769,AK150844,AK150856,AK150901,AK151916,AK151969,AK152245,AK152460,AK152886,AK159922,AK166763,AK167084,AK205198,BC055336,NM_009388,U05809	mRNA	6537.42	8053.8	7209.42	6746.01	5037.51	3065.21	1001.49
IVGNm10187	AK004273	ncRNA	6494.78	5944.07	4734.56	4241.09	3468.28	2946.7	3268.4
IVGNm20155	AK170049	mRNA	6488.09	8525.01	5769.54	6304.08	5772.46	6410.15	4987.47
IVGNm12832	AF203969,AK004317,AK010566,AK045238,AK149953,AK157205,AK158036,AK170842,AK171838,AK215308,BC006748,BC023297,NM_018813	mRNA	6482.84	7411.5	5812.72	5089.29	3394.52	1847.08	1135.65
IVGNm32703	AK090122,AK141463,AK159208,BC019753,BC022972,BC023821,BC024787,NM_133837	mRNA	6479.81	6658.43	5360.93	4312.78	2768.81	1576.11	926.232
IVGNm14880	AB246709,AB246710,AK156101,AK163844,AK198923,AK218999,BC013058,NM_001160016,NM_001160017,NM_008142,U29055	mRNA	6477.08	6887.68	7474.72	7523.69	5685.59	4079.45	1648.67
IVGNm05905	AF230356,AK032921,AK088438,AK151800,AK152546,AK153502,AK206837,BC013777,BC029642,NM_021336	mRNA	6447.38	6683.48	5558.1	4968.47	2982.38	1380.73	535.462
IVGNm02210	AK140866,BC043483,NM_018861,U75215	mRNA	6443.05	6136.81	3892.36	2925.12	1940.39	1552.12	1153.3
IVGNm16849	AK010960,AK011263,AK011765,AK012350,AK012365,AK013283,AK017806,AK051164,AK051393,AK076196,AK083327,AK146567,AK148978,AK151215,AK151670,AK160225,AK161575,AK165249,AK167691,AK167779,AK167808,AK167926,AK168271,AK169123,AK169210,AK169295,AK169606,AK188622,AK190170,AK209234,BC003825,NM_011655,X04663	mRNA	6437.43	6135.99	6038.03	4656.93	2317.19	534.52	231.912
IVGNm32525	AK007752,AK007809,AK010661,AK012444,AK131585,AK160387,AY341882,BC024339,BC046612,NM_025983	mRNA	6373.49	7112.87	6017.91	6317.09	6238.33	7515.94	5882.23
IVGNm06688	AF073517,AK005773,BC028510,NM_011353	mRNA	6371.21	6370.1	5703.28	5655.62	5661.4	5714.73	4266.64
IVGNm06879	AK004952,AK014384,AK083442,AK129028,AK150383,AK166953,AK169401,AK206339,BC049221,BC055327,NM_025828	mRNA	6355.68	6954.24	5317.69	4755.77	3298.93	2286.47	1158.27
IVGNm31137	AK146732,AK147080,AK158993,BC004625,D10918,NM_008683	mRNA	6353.96	6893.84	6240.48	6006.46	5710.05	5815.8	5091.73
IVGNm07096	AK036891,AK037035,AK083539,AK167446,AK177972,AY940114,BC013701,BC094424,NM_133800	mRNA	6351.41	6439.11	4942.48	2722.63	1000.67	582.756	448.745
IVGNm15408	AJ277386,AK019006,BC031816,NM_031248	mRNA	6345.96	6668.57	5788.72	5381.14	4810.03	3700.67	2079.85
IVGNm16785	AK146355,AK146478,AK168458,AK168501,AK168724,AK168796,AK168864,AK168876,BC070465,NM_010256,U01024	mRNA	6338.72	6992.3	5735.69	5150.67	3043.62	1085.75	637.646
IVGNm02173	BC023131,NM_029012	mRNA	6336.61	6338.16	3565.6	1762.16	665.442	456.171	333.333
IVGNm28353	AB026569,AK133054,AK135280,AK145897,AK147109,AK161102,AK161416,AK178547,AK180025,AK182679,AK188295,AK203574,AK210454,AK218973,BC016501,BC056609,BC057866,NM_001141931,NM_001141932,NM_020296	mRNA	6326.29	6156.73	5745.43	5306.4	3950.61	2989.66	1794.56
IVGNm05263	AF110512,AK004334,AK078372,AK168509,AK169572,BC005601,NM_026850	mRNA	6322.85	5999.75	5516.32	4180.9	2602.76	1723.98	994.926
IVGNm31990	AY038601,NM_001081092	mRNA	6314.14	8944.59	5758.11	7516.56	6486.68	6133.85	8905.27
IVGNm24080	AK006162,AK075632,AK148789,BC040750,BC049613,BC058966,BC085283,D38023,M60320,NM_008786	mRNA	6311.25	6770.82	6240.44	5846.55	4423.35	2641.35	963.165
IVGNm00939	AK003339,AK077948,AK151495,AK154811,BC025090,BC038524,BC115797,NM_026549	mRNA	6298.16	7356.65	4039.19	2105.04	710.08	361.809	318.867
IVGNm10184	AK004133,AK013803,BC082305,NM_001007589	mRNA	6295.6	6639.18	3129.26	1223.46	629.062	524.729	452.154
IVGNm07321	AK143561,AY570294,BC108953,BC108954,NM_207131	mRNA	6294.52	5747.37	5648.67	5774.11	6018.95	8008.3	7027.42
IVGNm22673	AK028041,AK045328,AK147258,AK155997,AK164286,BC034122,BC050095,BC053911,NM_011401	mRNA	6291.36	6208.29	5426.58	4893.96	3656.07	2460.25	1264.55
IVGNm05342	AF490392,AK077396,AK137029,AY046504,BC141406,BC141410,NM_133780	mRNA	6291.07	6169.25	4871.4	3482.99	1700.53	853.672	580.357
IVGNm22284	AF233685,AK002368,AK013340,AK077735,AK088685,AK179857,BC027517,NM_016763,U96116	mRNA	6287.56	6742.24	6082.42	6187.46	4852.72	3065.76	871.64
IVGNm14034	BC169258,NM_010123,U14172	mRNA	6277.96	7739.79	5095.96	3034.46	1260.84	781.173	542.02
IVGNm03018	AK034163,AK214167	mRNA	6276.23	5850.35	5241.12	6016.77	5732.88	5474.58	7078.91
IVGNm05381	AK146470,AK151820,AK162750,AK167621,BC031795,BC080766,NM_001190444,NM_146110	mRNA	6264.24	7022.44	6940.17	6056.36	5012.37	2700.18	1036.58
IVGNm12977	AK007521,AK012091,BC024881,BC089501,NM_025594	mRNA	6242.61	7398.08	6415.11	5677.06	4093.93	2227.49	914.145
IVGNm17826	AB047391,AK077412,AK167984,BC034648,BC054103,BC093481,NM_138659	mRNA	6241.19	6500.39	5852.31	5201.67	4484.11	2262.46	888.001
IVGNm14759	AK149979,AK150322,AK151371,AK153088,AK156281,AK157431,AK165567,AK165949,AK166020,AK168255,AK168772,AK170620,AK179877,AK185799,AK189325,BC005729,BC010191,L40595,M97590,NM_011201,U24700	mRNA	6231.69	6926.89	4314.27	3030.5	1633.4	897.535	610.228
IVGNm19391	AK004487,AK220449,NM_177763	mRNA	6225.76	6801.53	4481.59	2622.77	1611.29	1428.77	1160.01
IVGNm31568	AB093220,AK083541,AK087048,AK088012,AK162435,AK171487,AK180673,AK194289,BC006741,BC071208,BC110309,BC116320,NM_133847	mRNA	6222.35	6481.79	5292.51	4865.41	3421.89	2449.94	1096.88
IVGNm24424	AK006199,AK007370,AK008795,AK163304,BC013506,NM_026411	mRNA	6217.05	6247.25	3179.05	1224.45	532.452	438.382	471.003
IVGNm10974	AF022223,AK009149,AK013611,AK154469,AK171094,AK188292,BC003722,BC069918,BC093509,NM_001171739,NM_009736	mRNA	6213.1	6891.12	6560.53	6742.58	6423.95	7030.3	5522.54
IVGNm24510	AK003132,BC013503,NM_029272	mRNA	6205.35	7592.85	5576.86	5105.75	3096.06	1095.76	430.986
IVGNm01291	AK041454	ncRNA	6203.2	5608.49	4973.08	4571.68	3583.01	4345.48	4959.05
IVGNm13935	AB006714,AK158793,AK159049,BC031738,BC065046,NM_001136058,NM_007765,U72875	mRNA	6190.04	6321.28	6991.24	6472.3	4607.46	2026.28	949.587
IVGNm06693	AF058955,AK003867,AK005273,AK081965,AK088801,AK132762,AK150594,AK152783,AK153198,AK160130,AK160652,BC038497,BC052774,BC056353,BC057605,NM_011506	mRNA	6182.29	5920.11	5500.76	4680.15	3445.51	2023.21	1228.34
IVGNm30122	AJ627038,AK048689,AK146110,BC010817,EU599043,EU599044,NM_145405	mRNA	6180.88	7671.68	6437.59	6553.05	4999.91	2823.52	1510.88
IVGNm22306	AF512565,AF547215,AK189230,AK213579,BC024466,BC024986,BC051051,BC096690	mRNA	6160.65	6606.78	5922.66	5869.33	5512.18	5837.96	6030.44
IVGNm05172	AF065386,AF068223,AK002761,AK012499,AK146271,AK151492,BC046753,NM_013715,U70736	mRNA	6158.52	4681.47	5711.9	4573.69	2891.82	1450.61	786.615
IVGNm17263	AK146482,AK150374,AK151588,AK152007,AK152970,AK159098,AK159636,AK159756,AK159815,AK166816,AK167326,AK167774,AK167786,AK167909,AK167995,AK168131,AK168398,AK168543,AK169867,BC021508,BC023049,BC024058,BC024830,BC027388,BC027767,BC027822,BC028851,BC031128,BC033325,NM_134101,NR_027485	mRNA	6141.56	6887.79	7360	6939.58	5674.97	3743.48	1413.8
IVGNm23059	AK009767,AK010267,NM_007475	mRNA	6137.7	6711.25	5806	6276.14	6172.41	7552.37	7619.56
IVGNm02198	AK090178,BC039745,BC055105,NM_009497	mRNA	6108.52	6457.57	5281.68	5026.92	4446.14	3700.02	2153.79
IVGNm28075	AK078148,BC042710,NM_177725	mRNA	6089.92	5345.39	1950.62	806.12	507.951	492.07	450.424
IVGNm12899	AK013963,AK075699,AK084515,AK088958,AK159092,AK165638,AK182919,BC086667,BC089021,NM_008640,U34259	mRNA	6080.01	6103.2	5487.48	5818.84	5405.74	5378.74	3696.19
IVGNm05942	AK002373,AK003380,AK008502,AK008889,AK019002,AK153547,AK166594,AK168342,BC002097,NM_024220	mRNA	6073.97	6716.67	5360.74	4935.43	3779.06	2037.69	791.303
IVGNm34733	AK005039,AK019147,AK027916,AK049832,AK051068,AK053918,AK083383,AK145797,AK145860,AK146380,AK147188,AK150427,AK150927,AK151040,AK151124,AK151556,AK152044,AK153227,AK158562,BC003461,BC005697,NM_021880	mRNA	6065.39	6653.46	7189.63	7025.62	5277.39	2860.98	1377.74
IVGNm11666	AK089914	mRNA	6060.64	6149.5	4168.83	2891.56	1449.96	919.105	735.846
IVGNm06761	AB012580,AK045228,AK049767,AK145689,AK168256,BC018598,BC089020,NM_018749	mRNA	6055.73	6957.21	6301.13	5075.09	2790.61	1110.52	735.103
IVGNm20172	AF482999,AK031718,AK032881,AK034949,AK146457,AK168714,AK168732,AK168743,AK168995,AK169095,AK169266,BC004019,BC006639,D16262,NM_008590	mRNA	6039.9	6489.38	7017.44	7466.48	6577.57	5690.59	3174.52
IVGNm04660	AB088407,AK006323,AK075779,AK129007,AK151237,AK168914,BC010217,NM_025494,U13839	mRNA	6029.03	6090.78	6127.44	5661.52	4169.65	3169.91	1988.93
IVGNm03442	AK005039,AK019147,AK027916,AK049832,AK051068,AK053918,AK083383,AK145797,AK145860,AK146380,AK147188,AK150427,AK150927,AK151040,AK151124,AK151556,AK152044,AK153227,AK158562,BC003461,BC005697,NM_021880	mRNA	6026.42	6348.86	6561.86	6458.67	4731.58	2646.34	1254.41
IVGNm07305	AK139315,AK157825,BC060375,NM_198606	mRNA	6025.56	5898.17	3754.53	1896	627.501	384.598	255.572
IVGNm23302	AK081757,AK218607,BC002004,NM_013536	mRNA	6023.02	6103.17	5965.3	4525.17	2458.41	1343.51	865.416
IVGNm29911	AK077065,AK078136,AK150071,AK170697,BC018367,BC018491,BC026136,NM_133718	mRNA	6020.66	5879.09	5333.64	5019.75	4363.72	4375.83	2932.28
IVGNm06188	AF071546,AK133822,AK141351,AK145173,AK147059,AK187082,AK219514,BC010331,NM_001172100,NM_001172101,NM_145135	mRNA	6018.87	6813.14	5914.93	5388.07	4392.85	1906.85	724.792
IVGNm23069	AK007550,AK008204,AK150587,AK150751,AK152674,AK207459,AK211973,AY544984,BC082589,NM_007604,U16741	mRNA	6015.21	5576.47	5422.41	4794.43	3146.52	1760.24	974.071
IVGNm33246	AJ252140,BC120588,BC137658,NM_011568,U89876	mRNA	6013.81	6265.56	6634.71	5946.12	3242.09	1241.75	488.802
IVGNm24357	AK002330,AK005082,AK011374,AK018011,AK076064,AK151151,AK155285,AK165932,BC008273,CT010177,NM_025313	mRNA	5984.06	7105.13	5933.67	6355.03	5861.99	4020.44	1958.05
IVGNm21890	AB012693,AK151922,BC009094,BC012667,HQ585874,NM_010581,Z25524	mRNA	5980.39	6064.37	5223.09	5364.1	4362.31	3731.86	2135.86
IVGNm27905	AK008255,AK037305,AK180605,BC024482,NM_028809	mRNA	5967.55	6183.84	5217.2	4664.95	3084.07	1917.24	956.11
IVGNm05600	AK013298,AK149994,AK159233,AY095934,BC018228,BC053380,L22472,NM_007527	mRNA	5959.14	6589.44	5550.93	5220.55	4179.13	3384.05	2270.31
IVGNm04391	AK159572,BC023409,BC039637,BC092284,BC106173,BC132088,BC132655,K00129,L36068,M12185,M69067,M69068,M86502,NM_010380,U47325	mRNA	5955.08	6278.14	6439.04	6496.13	6446.41	6548.08	7851.99
IVGNm05961	AK005343,AK007559,AK050267,AK086044,BC023171,NM_025460	mRNA	5952.06	6332.3	5290.97	4508.66	2917.7	2076.92	1236.52
IVGNm02225	NM_007658	mRNA	5934.96	5941.41	2270.92	933.376	602.097	550.059	503.647
IVGNm15091	AK146965,AK149761,AK150148,AK152397,AK168130,BC057660,NM_001080384,NM_001080385,NM_001080386,NM_016760,U91848	mRNA	5927.34	6868.24	6730.69	6191.68	4655.47	1901.17	818.605
IVGNm25180	AK012338,AK012817,AK145434,BC003848,BC100539,BC113766,NM_026030	mRNA	5886.2	5425.29	4366.97	2550.58	1050.4	418.349	331.856
IVGNm24017	AF037208,AK003328,AK010626,AK012647,BC012663,D88792,NM_007792	mRNA	5878.27	5893.83	4929.65	4171.48	2404.17	919.491	435.858
IVGNm23508	AK008155,AK008156,AK008286,AK008414,AK009338,AK009396,AK009461,AK009493,AK009608,AK009642,AK009652,AK009775,AK009840,AK009985,AK010024,AK010090,AK010092,AK011579,AK011947,AK019084,AK019201,AK019207,AK019215,AK019242,AK019245,AK019291,AK019301,AK019324,AK019354,AK019359,AK019364,AK019368,AK019430,BC028633,NM_026614	mRNA	5873.54	6964.73	5780.53	6196.56	4922.63	2566.83	1032.47
IVGNm16154	AK012656,AK014920,AK020036,AK050165,AK161656,AK166329,AK166633,BC056964,BC110660,NR_028401	mRNA	5873.31	5504.36	4317.92	3544.28	2908.06	3266.57	4024.99
IVGNm32854	AB597964,AK013517,AK031907,AK041567,AK088274,AK166608,BC021748,NM_175190	mRNA	5868.19	6021.1	5374.9	4935.18	4110.75	3171.62	1579.24
IVGNm06873	AF332065,AF332066,AK014989,AK015968,AK172887,BC004716,NM_025736	mRNA	5867.85	5522.34	5056	4025.81	3337.49	1736.11	812.005
IVGNm30683	AK039084,AK145759,AK168286,BC004605,BC068160,BC141043,NM_009874,U11822,X74145	mRNA	5858.65	5205.44	2465.46	1006.43	436.378	311.808	280.235
IVGNm30342	AK003862,AK013992,AK156498,AK215905,BC048638,BC056438,BC059231,BC089312,NM_138596	mRNA	5853.99	6157.71	5155.3	4538.6	3045.86	1606.2	905.916
IVGNm06672	AK008610,AK028223,AK078044,AK150335,BC040079,NM_011051,U49112,X14938	mRNA	5848.65	5838.98	5029.59	3817.31	1945.58	676.77	343.183
IVGNm17097	AB049953,AK003444,AK028226,AK172171,BC025456,BC058959,NM_026768	mRNA	5837.73	5381.72	5387.76	4029.64	2367.21	1370.41	928.481
IVGNm24295	AB029448,AF319975,AK013231,AK017275,AK049660,AK087937,AK132248,AK135452,AK145872,AK146867,AK146908,AK150876,AK220150,BC016438,BC031461,NM_019791	mRNA	5826.19	6501.87	6496.63	7062.81	5268.28	3924.26	1599.64
IVGNm06615	AF121837,AF121838,AF121839,AK002221,AK011589,AK049466,AK136341,AK145051,AK147142,AK150452,AK151169,AK153076,AK153417,AK159511,AK160100,AK161538,AK165397,AK169394,AK169712,BC068163,J02583,NM_009984,X04392,X06086,Y18465	mRNA	5822.13	5210.01	5137.78	4969.07	4562.64	5452.21	4996.28
IVGNm12895	AK002267,AK007729,AK078065,AK088358,AK135336,AK142009,AK146624,BC038624,BC082593,BC085267,NM_001079694,NM_001079695,NM_009159	mRNA	5810.72	5259.27	4717.26	3307.69	1570.26	1429.97	1253.62
IVGNm06838	AF095938,AK004362,AK010561,AK029520,AK034928,AK049590,AK050475,AK075990,AK145923,AK147286,AK147624,AK151333,AK153085,AK162148,AK169254,BC011301,BC031849,DQ402975,NM_023281	mRNA	5806.42	6511.27	6530.04	6553.73	5089.2	3297.27	1389.13
IVGNm05890	AK005110,AK011825,AK019202,AK161913,BC006764,BC018475,BC027430,NM_020560,Z46966	mRNA	5796.83	5834.02	3308.59	1177.53	415.124	269.913	235.826
IVGNm18928	AK003956,AK079304,AK146589,AK159265,AK170132,AK198479,AK205490,BC036958,BC043086,NM_178111	mRNA	5788.89	5851.24	5462.23	5173.92	4316.66	2328.11	768.859
IVGNm32547	AK004831,AK012605,AK051608,AK133872,AK146293,AK159519,AK171709,AK203976,BC012039,NM_026499	mRNA	5779.61	5792.75	4494.45	2565.52	1039.23	793.4	721.655
IVGNm28195	AK134274,AK138442,AK146469,AK209187,AK214083,BC011321,BC026381,NM_153065	mRNA	5769.17	6316.85	4903.01	3560.27	1927.07	1241.88	709.129
IVGNm17581	AK002865,AK007643,AK078463,AK150774,AK171028,BC016219,NM_026154	mRNA	5748.82	6380.09	5265.29	4681.2	3459.34	1991.02	1153.36
IVGNm00835	AK002300,AK032908,AK167673,AK168119,AK168132,BC018236,BC055930,NM_008525,U89407,X13752	mRNA	5746.34	6141	5951.88	4802.46	2484.66	676.595	361.229
IVGNm16045	AB030200,AK007526,BC028502,BC114968,NM_021502	mRNA	5742.12	6401.72	5448.17	5594.54	4861.26	3999.69	2483.06
IVGNm03913	AK018679,AK021021,AK151922,AK164165,BC012667,NM_010581,Z25524	mRNA	5739.88	5197.12	5275.43	5016.21	4639.75	4468.88	3426.36
IVGNm01921	AF004670,AF093852,AK030413,AK076191,AK157820,AK161710,AK168223,AK172888,BC013489,BC061181,NM_007453,Y12883	mRNA	5719.12	6493.94	5533.57	5455.5	4552.56	4360.35	2990.77
IVGNm06952	AF325260,AK012650,AK076205,AK151110,AK196065,BC005743,NM_027324	mRNA	5717.41	6129.14	5439.84	5226.65	4914.77	3430.65	2010.18
IVGNm23398	AK011435,AK035663,AK088134,AK088606,AK164981,AK184157,BC020139,M13019,M30774,NM_021288,NR_000040.1,NR_000040.2,NR_033402	mRNA	5714.55	6008.46	5143.04	3895.63	1542.13	518.771	247.175
IVGNm33208	AK141304,AK146542,AK149605,AK149965,AK150002,AK150422,AK150592,AK150755,AK150805,AK151351,AK151546,AK152141,AK152217,AK152791,AK152834,AK153365,AK159606,AK159729,AK159965,AK167757,AK167796,AK168330,AK168336,AK168612,AK168893,AK169265,AK170603,BC008549,BC018581,BC093512,J05185,NM_011032,X06453	mRNA	5711.08	6386.71	6485.64	6424.44	6006.4	5678.68	5306.36
IVGNm22000	AK002985,AK088313,AK168325,BC014832,NM_026396	mRNA	5699.96	4663.8	2942.91	959.702	257.668	180.784	105.549
IVGNm04695	AK190269,AK194272,AK199218	mRNA	5696.88	6273.11	5649.43	5144.36	3326.53	1731.43	828.112
IVGNm23075	AK002251,AK012793,AK151443,AK151619,AK170310,BC070474,L08115,NM_007657	mRNA	5695.87	5277.85	5165.17	5101.3	4111.86	4480.66	2987.06
IVGNm28975	AF093542,AF156934,AF203445,AF203446,AK076282,AK145556,AK160291,AK179770,BC003252,BC055071,BC066184,BC068314,NM_001040435	mRNA	5695.3	6589.2	4269.63	2763.6	1333.25	1147.93	1240.27
IVGNm15337	AK003534,AK152986,AK215622,BC005795,BC048840,BC055454,BC099594,NM_027925	mRNA	5693.38	6152.84	5527.4	5046.46	3788.84	2429.23	1205.47
IVGNm31425	AK012789,AK013227,AK076679,AK080853,AK162257,BC025197,BC060969,BC110310,NM_025480	mRNA	5682.74	5447.93	4709.34	4436.38	3651.65	3128.52	1857.78
IVGNm17598	AK012355,AK037339,AK051207,AK162421,AK169192,AK186950,AK192798,AK192991,AK195794,AK195953,AK200167,AK202269,AK204404,AK210079,AK211597,AK214589,BC004825,NM_028230	mRNA	5657.13	6298.73	6317.08	6120.56	4951.39	3351.06	1740.96
IVGNm24533	AK019452,BC028766,NM_030093	mRNA	5649.28	5694.07	5327.76	5442.23	4761.18	4204.26	2810.15
IVGNm05963	AK002316,AK003655,AK010438,AK180087,AK183833,AK214432,BC010684,NM_025548	mRNA	5637.23	5855.28	5041.13	4433.61	3040.64	1303.54	602.526
IVGNm12070	AK008579,AK050282,AK083831,AK151645	mRNA	5623.03	6122.12	5263.45	5050.76	3812.58	2611.27	1131.19
IVGNm13155	AK012299,AK017353,AK019420,AK159939	mRNA	5609.64	6072.91	4566.83	3715.06	1992.47	820.76	465.182
IVGNm32475	AK009799,AK011481,AK011744,AK013528,AK030730,AK077795,AK139924,AK146243,AK150258,AK154024,AK193733,AK201684,BC002231,BC021355,NM_024193	mRNA	5603.83	5909.95	5145.31	3791.92	2350.79	1463.74	1261.28
IVGNm03526	AK002397,AK139942,AY082613,BC002040,NM_018854,U38981	mRNA	5602.65	6220.78	4779.29	4484.47	3287.03	2102.01	1042.04
IVGNm20342	AB027565,AF333036,AK007891,AK146125,AK151927,BC037643,NM_001042513,NM_001042514,NM_001042523,NM_015762	mRNA	5593.53	7220.06	4587.45	4742.88	2348.25	1619.98	604.711
IVGNm32565	AK003735,AK013571,AY187289,BC019947,BC030298,NM_001048227,NM_001048228,NM_001048229,NM_026797	mRNA	5581.21	6566.55	4514.61	3829.32	2396.68	1429.21	935.44
IVGNm23142	AK076019,AK076801,AK152249,AK159680,AK165840,AK166262,AK192847,AK193709,AK194195,AK196579,AK204550,BC019511,J04627,NM_008638	mRNA	5580.12	5939.12	5565.64	5723.08	4726.12	3629.49	1683.47
IVGNm16948	AJ238270,AK042203,AK088118,BC032965,BC060285,NM_019537	mRNA	5575.71	6488.24	4492.68	3151.26	1199.65	382.012	258.465
IVGNm31207	AB003304,AF060091,AK010441,AK088367,AK133839,AK219104,BC012246,BC106144,NM_011186	mRNA	5564.49	5862.17	5333.1	4450.71	3139.81	1597.27	785.281
IVGNm04908	AK002589,AK004191,AK007178,AK010027,AK010464,BC053332,BC059716,NM_025329	mRNA	5562.74	5917.84	5077.5	4520.99	2997.12	1573.14	712.704
IVGNm13011	AK012299,AK017353,AK019420,AK159939	mRNA	5552.07	5716.65	4528.34	3615.92	1949.79	848.032	477.437
IVGNm05268	AK009074,AK089015,BC004614,NM_027098	mRNA	5543	6595.85	5382.31	5256.44	3797.33	2468.29	1395.14
IVGNm13399	AK005021,AK075692,AK151455,AK178320,AK188080,AK188929,AK189786,AK205680,BC014818,BC041682,NM_133666	mRNA	5539.17	6533.25	5797.28	5956.9	4652.01	2472.28	970.53
IVGNm23106	AB012886,AK002277,AK148749,AK156315,BC047202,BC092538,L75822,NM_001159518,NM_008048	mRNA	5537.22	6138.07	5001.42	4082.78	3651.99	3829.92	4379.55
IVGNm31583	AK087492,AK129153,AK150120,AK179937,AK190389,AK190574,AK192785,AK197562,AK197985,AK199746,AK202287,BC054795,BC059031,BC062093,NM_011520	mRNA	5533.6	6003.2	5228.89	4645.47	3425.93	1838.36	835.822
IVGNm27882	AK028767,AK035205,AK035414	ncRNA	5492.68	5367.28	5037.08	4053.13	3023.99	1786.97	709.387
IVGNm34613	AK007598,BC004094,BC043942,BC054358,BC071249,NM_026969	mRNA	5491.25	5886.87	5357.66	5013.52	3678.53	2332.49	1199.23
IVGNm31516	AK044522,AK171995,BC013720,BC066048,NM_001081214	mRNA	5486.06	5408.24	1707.53	1203.86	1071.23	1031.1	903.063
IVGNm32695	AJ250345,AJ278128,AK013744,AK088738,AK201625,AK211388,BC008164,BC080668,BC115477,BC115478,NM_133749	mRNA	5477.21	5727.3	5023.83	4440.38	3892.53	3548.26	2300.39
IVGNm26550	AK018493,AK076177,BC034509,BC047141,BC061498,BC065043,BC096489,NM_020618	mRNA	5462.94	6287.45	4984.34	4491.65	3132.62	1852.13	922.322
IVGNm02126	BC058078	mRNA	5452.49	4278.97	1564.96	1174.23	1019.49	1084.25	991.734
IVGNm04691	AK146265,AK149483,AK170463,AK197235,AK210670,AK214128,AK215659,AK216350,AK218942,AK220067,BC004828,BC006812,NM_001199113,NM_001199114,NM_001199115,NM_001199116	mRNA	5444.95	6275.17	5436.87	5223.92	3907.64	3273.84	2093.3
IVGNm22136	AF004591,AK002432,BC027632,NM_009720	mRNA	5425.68	6760.35	5143.07	5633.46	5606.95	6385.68	6002.16
IVGNm30755	AK046931	mRNA	5422.37	5787.99	4702.78	5241.2	4397.22	4827.04	7120.28
IVGNm31790	AK011143,BC048412,NM_016690	mRNA	5416.41	5156.7	4439.3	4013.59	2671.61	1722.26	1293.54
IVGNm16053	AF075136,AK010928,AK088745,BC132081,BC132087,NM_021788	mRNA	5413.78	5241.38	2770.81	660.855	212.498	164.203	165.384
IVGNm10282	AK013282,AK028648,AK129408,BC024646,BC034061,BC059220,NM_001112722,NM_001112723,NM_172415	mRNA	5407.37	5060.89	2529.81	964.229	445.399	291.052	232.653
IVGNm01699	AB013466,AF079971,AK045451,AK078067,AK143829,AK168979,AK172050,BC004662,BC088833,NM_001112701,NM_011181	mRNA	5392.07	5767.73	4860.63	4123.7	2830.26	1721.6	1071.77
IVGNm16954	AF153451,AF288690,AK011573,AK012805,AK017724,BC027277,NM_019731	mRNA	5389.35	5389.77	4840.67	4886.67	4712.59	4595.06	2733.56
IVGNm06819	AK011476,AK013360,AK151642,AL355719,BC029784,NM_021556	mRNA	5388.62	5927.94	3868.86	2453.21	1215.77	724.378	647.704
IVGNm29465	AK007093	ncRNA	5377.04	4254.04	2330.6	1605.01	1018.38	958.855	1090.07
IVGNm00803	AK003362,AK008117,AK008961,AK013394,AK016190,AK019976,AK020157,AK167623,BC004736,BC025506,BC031730,NM_026591	mRNA	5375.18	6037.35	4765.5	3468.18	1848.09	1319.64	1317.01
IVGNm04937	BC071254	mRNA	5369.63	1685.85	616.164	388.579	152.955	94.926	59.5003
IVGNm22299	AB021665,AK008689,AK038307,AK089004,AK162841,AK187580,BC005415,NM_011706	mRNA	5355.4	5424.42	4468.02	3411.17	1698.19	808.643	463.99
IVGNm05666	AK145649,BC072558,NM_009077	mRNA	5347.29	6426.45	5062.42	5059.58	3465.5	1477.72	612.957
IVGNm25665	AK140354,BC016659,BC058411,BC094592,NM_198616,NR_028440	mRNA	5340.89	5858.94	2125.38	736.28	448.973	468.67	535.502
IVGNm16355	AB080370,AK077639,BC016594,NM_144543	mRNA	5340.29	5619.58	4705.99	4139.73	2484.16	1354.57	762.604
IVGNm05726	AK089294,AK093885,AK150363,AK150364,AK150579,AK150622,AK150636,AK150694,AK150768,AK150946,AK151256,AK151275,AK151276,AK151374,AK151829,AK151962,AK152036,AK152045,AK152168,AK152187,AK152188,AK152406,AK152458,AK152567,AK152578,AK152593,AK152638,AK152680,AK152828,AK152881,AK152892,AK153191,AK153291,AK159097,AK159209,AK159440,AK159490,AK159512,AK159580,AK159642,AK159743,AK159896,AK159970,AK165227,AK1…	mRNA	5336	5264.48	5507.57	5690.44	5897.52	5564.75	7667.81
IVGNm34915	AK003534,AK152986,AK215622,BC005795,BC048840,BC055454,BC099594,NM_027925	mRNA	5321.87	5597.26	5190.52	4639.9	3538.92	2197.88	1153.8
IVGNm33529	AK009158,AK013761,AK050883,BC050937,BC058371,DQ083330,NM_028419	mRNA	5316.46	6191.44	5415.21	5020.87	3580.71	2423.29	1362.9
IVGNm11576	AK038143,AK077107,AK079229,BC002027,NM_013522,U62105	mRNA	5313.69	4741.3	3653.07	1992.78	544.087	233.042	173.2
IVGNm05085	AK003501,AK011634,AK012655,AK013246,AK014283,AK147108,NM_009084	mRNA	5313.08	6238.11	4565.99	5199.87	4475.71	4140.31	3366.96
IVGNm02899	AK004422,AK017254,AK159298,AK165508,BC012408,BC040244,NM_001110499,NM_001110500,NM_007597	mRNA	5310.6	5859.26	5440.05	5650.46	4929.71	5901.59	4902.37
IVGNm23339	AF073993,AF406651,AK049771,AK089012,AK137214,BC059107,BC141253,BC145588,NM_016806,NM_182650	mRNA	5305.22	4298.69	6730.43	5475.91	3971.93	3024.91	1326.76
IVGNm16095	AK003739,AK006057,AK014290,BC003972,NM_025391,NR_028367	mRNA	5302.27	5428.76	3135.54	2110.02	1044.1	510.126	313.761
IVGNm01456	AK087103,AK171859,BC011319,NM_009884	mRNA	5293.38	4566.84	1880.99	826.959	635.88	637.832	589.263
IVGNm12827	AF072403,AK053584,AK144137,AK146615,AK147904,AK151769,AK159420,AY027436,BC020042,NM_011803	mRNA	5282.03	4479.63	2078.34	1499.56	1235.78	1026.32	787.319
IVGNm24605	AK008402,BC026128,BC125297,NM_138607,Y18505	mRNA	5281.97	5588	4906.29	3651.51	1608.42	713.349	551.283
IVGNm06889	AK008996,AK012174,AK014354,AK144728,AK166961,BC025134,BC037099,BC043044,BC057997,BC116752,BC119168,NM_025959	mRNA	5260.81	5081.02	3710.5	3071.43	1715.42	1048.5	735.826
IVGNm31552	AF176520,AK019715,AK154911,AK188786,BC010776,NM_013908	mRNA	5252.67	5464.1	4779.07	4155.09	3111.19	2340.83	1981.52
IVGNm31824	AK002543,AK009245,AK151108,AK151400,AK152129,AK159961,AK167830,BC016519,BC042473,BC051062.1,BC090403,NM_025517	mRNA	5243.55	5738.18	4429.76	3850.51	2995.93	2245.81	1382.44
IVGNm30139	AK030363,AK050050,AK077877,AK081547,AK087470,AK129027,AK150640,AK151541,AK151791,AK152242,AK153840,AK153886,AK160037,AK160607,AK168505,AK168937,AK169669,AK214638,AX799090,BC028897,BC037612,BC085313,L34260,NM_008408	mRNA	5237.14	5200.19	4731.97	4247.71	3273.07	2187.27	983.59
IVGNm06893	AF501309,AK029915,AK151269,AK151810,AY553638,BC049700,BC138858,BC138859,NM_026002	mRNA	5228.3	6459.23	5122.46	4145.43	2912.64	1761.67	1203.84
IVGNm04153	AK081219,AK082788,NM_001033279,NM_001044719	mRNA	5219.38	5166.58	4505.51	3645.05	2925	2393.71	1655.97
IVGNm24374	AJ277891,AK009898,AK012240,AK018591,AK169164,AK171656,AK172112,AK180094,BC034286,BC051508,BC057904,NM_025537	mRNA	5218.73	5184.65	4690.38	3823.47	2271.38	1207.12	493.953
IVGNm20182	AK014789,AK030354,BC018239,NM_013530	mRNA	5215.03	5405.95	6055.4	5904.72	4883.59	3400.9	1601.36
IVGNm32399	AF058797,AK002632,AK004872,AK011389,AK083367,AK144061,AK150414,AK151294,AK158932,BC049070,BC132121,BC138512,NM_018753	mRNA	5194.55	5597.84	5096.46	4497.17	2650.24	1233.13	562.343
IVGNm03331	AK033321,AK138079,BC094326,D12513,NM_011623,U01915	mRNA	5191.85	5484.28	4321.71	3402.45	1848.59	440.448	277.749
IVGNm06921	AK005645,AK019681,BC023885,BC051469,NM_026594	mRNA	5166.9	5786.29	4784.72	4228.86	3082.88	1496.98	719.107
IVGNm12643	AF110812,AF135595,AK012346,AK139213,AK145648,AK150802,AK168641,BC002122,NM_013902	mRNA	5163.32	6529.8	5206.14	5419.27	4816.91	4010.12	2494.13
IVGNm19704	AJ238540,AK036845,BC054472,NM_013820	mRNA	5156.81	5057.51	3226.55	1890.87	764.705	440.833	312.502
IVGNm32454	AJ002387,AK004578,AK076079,AK077463,AK144650,AK144742,AK146647,AK148539,AK149447,AK151244,AK151647,AK151806,AK152020,AK152521,AK152958,AK159719,AK160592,AK160821,AK166207,AK166739,AK167011,AK168012,AK168230,AK169034,AK179470,AK196010,AK198470,AK204137,AK206130,AK207319,AK207523,AK207843,AK214147,AK216390,AK219238,BC005785,BC050927,D78645,NM_001163434,NM_022310	mRNA	5155.82	5373.87	4491.26	3934.37	2548.41	1335.93	451.441
IVGNm05957	AK003133,AK019099,BC061002,BC120712,BC120714,NM_025348	mRNA	5155.32	6479.68	4778.15	5495.46	5586.29	6064.23	4411.89
IVGNm17622	AK028955,AK045539,AK196747,BC024599,NM_145144	mRNA	5151.18	6311.9	4073.75	5147.44	3501.58	2956.58	3562.29
IVGNm06926	AK003685,BC009125,NM_026746	mRNA	5140.75	5120.08	4184.42	3642.38	2316.99	1294.34	862.33
IVGNm04616	AF153449,AF288689,AK002525,AK007399,AK137906,BC028503,NM_019730	mRNA	5135.62	6275.7	4555.41	4444.55	4176.15	3708.04	2581.79
IVGNm17037	AB049639,AK002797,AK010329,AK167247,BC046750,NM_025553	mRNA	5133.96	5338.7	4738.11	4251.14	2464.64	1008.67	458.846
IVGNm08274	AK029923,AK052130,AK132750,AK151899,AK152003,AK153867,AK189453,BC002175,BC016080,BC051038,BC085483,NM_133933	mRNA	5132.9	5148.59	5384.03	4971.23	4128.26	3596.53	2136.4
IVGNm06942	AB055004,AK051023,AK164292,AK167539,AK169349,AY027919,BC024072,BC024123,BC031717,NM_027052	mRNA	5132.08	4822.86	3963.67	4291.89	3203.23	3191.56	3859.01
IVGNm32693	AK002874,AK013440,AK017150,AK051230,BC006888,BC042686,NM_133684	mRNA	5122.87	5942.16	4575.06	4073.39	2668.47	1198.93	458.385
IVGNm31230	AB049821,AB088411,AB088412,AB207243,AK010646,AK152277,AK198843,AK213487,BC013507,NM_001146057,NM_001146058,NM_133348	mRNA	5122.21	5713.34	5863.3	6066.36	5383.59	3166.81	975.603
IVGNm24386	AK010468,AK016479,AK075858,BC005731,NM_025740	mRNA	5118.81	4992.2	4190.86	3432.07	1866.31	785.258	383.983
IVGNm24627	AK145891,AK145916,AK150376,AK150470,AK151042,AK151182,AK151932,AK151988,AK152144,AK153434,AK167643,AK168038,AK172175,AY424364,BC003288,NM_145422	mRNA	5101.69	5423.56	4718.13	4007.97	2442.91	1016.46	482.061
IVGNm04232	AK053296,AK132380,BC072601	ncRNA	5101.47	4934.98	4207.52	3921.77	3082.56	2444.2	3368.55
IVGNm07217	AK014481,AK034964,AK036304,AK077022,AK077366,AK173201,BC027180,NM_175251	mRNA	5094.94	4690.79	3290.25	2044.85	1001.76	575.683	323.52
IVGNm16319	AK040625,AK085705,AK088268,AK128988,AK164199,BC011412,BC025459,BC025491,BC031197,BC042580,BC139015,BC139016,NM_133953	mRNA	5094.4	5750.58	5131.09	4808.16	3088.15	1529.43	840.213
IVGNm06856	AK003335,AK009889,BC048466,EF437326,NM_025380	mRNA	5093.57	5335.33	3748.24	2711.13	1147.79	611.815	462.465
IVGNm34502	AK005285,AK009916,AK021228,AK088697,BC028489,NM_026632	mRNA	5092.71	5261.02	3997.01	3923.23	3682.6	2761.45	1751.29
IVGNm16815	AF124786,AK003608,AK018732,BC006815,NM_010885	mRNA	5085.06	5777.12	4244.42	4702.61	4250.98	3692.69	2531.38
IVGNm18514	AK009110	mRNA	5082.18	4499.22	3630.34	3842.53	3391.06	3096.79	3543.03
IVGNm14541	AK076019,AK076801,AK152249,AK159680,AK165840,AK166262,BC019511,J04627,NM_008638	mRNA	5077.1	5766.62	4936	4721.08	3925.43	3111.57	1623.08
IVGNm33343	AF123533,AK004790,AK049841,AK076803,AK078254,AK098162,AK152670,AK154125,AK170624,AK171062,AY779275,AY779276,BC006926,CT010268,NM_019703,Y19008	mRNA	5074.23	5503.66	5748.94	5277.4	3793.16	2201.54	1070.58
IVGNm31699	BC025067,BC096391,NR_028574	ncRNA	5073.27	5905.4	4109.39	4310.23	3857.86	4004.42	3686.43
IVGNm07702	AK017226,AK139649,AK177875,AK181783,BC016597,BC059229,NM_029409	mRNA	5059.01	5178.54	4527.47	4124.64	2833.61	2140.77	1452.67
IVGNm04712	AK042942,AK076977,AK078778,AK153889,AK161047,AK166948,AK168731,AK187493,AK211794,BC010203,BC027295,L26320,NM_007999	mRNA	5047.42	5271.95	3323.23	2008.28	768.324	327.412	282.122
IVGNm03193	AK079367,AK147217,AK147549,BC093480,D50410,NM_009616	mRNA	5045.41	5320.14	4204.24	4075.3	3021.58	2802.22	1608.78
IVGNm31813	BC049991	ncRNA	5042.83	6904.51	4496.08	5077.86	4850.4	3775.61	2495.49
IVGNm22350	AK178136,AK199024,AK206575,AK207249,AK210171,AK210400,AK216927,AK218135	mRNA	5036.24	5553.26	5485.52	5174.08	3515.11	1758.63	761.456
IVGNm35865	AK075945,AK077401,AK145060,AK156529,AK157095,AK215759,BC043453,NM_172575,NM_178845	mRNA	5028.7	4697.23	4109.3	3157.53	1908.01	1239.68	689.783
IVGNm33387	AK004555,AK013502,BC002238,NM_001205067,NM_024205	mRNA	5016.24	6116.59	5136.21	4901.33	4042.39	3289.95	2047.57
IVGNm21056	AK159942,AK161476,BC059043,NM_001199360	mRNA	5008.08	5496.98	4639.5	4559.07	3047.49	2150.73	1037.49
IVGNm04683	AK004612,AK147717,AK150068,AK150185,AK158342,AK193245,AK202069,AK202538,BC037129,BC046228,NM_013818	mRNA	5003.47	5230.41	4716.57	3962.61	2575.25	1223.96	748.163
IVGNm20054	AK008606,AK010409,AK011313,AK028159,AK145537,AK169792,BC002006,BC027172,NM_013538	mRNA	4998.24	5617.52	4363.95	3858.81	2310.69	1354.33	1065.04
IVGNm05291	AK014888,AK014966,AK132868,BC006946,BC100537,NM_028534	mRNA	4992.79	6636.31	4837.36	4528.26	4012.32	2286.25	1179.03
IVGNm04857	AK131620,BC011215,BC042572,K00614,NM_010391	mRNA	4992.18	5512.13	5403.73	5613.84	5206.27	5779.62	5762.46
IVGNm05914	AK077664,AK087924,AK131976,AK133890,BC012966,NM_021876,U78103,U97675	mRNA	4987.85	4222.44	2350.81	941.602	543.346	466.8	474.49
IVGNm15790	AK090120,AK090125,AK090126,AK090127,AK090128,AK145028,AK166372,BC113756,D10049,U63133	mRNA	4985.78	5209.12	5017.8	5040.76	4253.09	3443.63	2159.19
IVGNm30403	AK011810,AK014180,AK014918,AK153058,AK166631,AK167798,BC002188,BC019512,BC094468,NM_024221	mRNA	4984.07	4844.23	4628.03	4327.93	3477.99	2552.05	1194.75
IVGNm11104	AK003388	mRNA	4980.44	4843.14	3168.8	1712.47	835.229	612.576	506.974
IVGNm08421	AK006541,AK034942,AK145894,AK150542,AK150663,AK151378,AK161024,AK168019,AK182997,AK207048,AK214922,BC031544,NM_027976	mRNA	4976.43	5196.18	4851.05	4322.29	3426.93	2453.85	1587.74
IVGNm01673	AB025405,AK007449,AK169560,BC010484,BC057885,NM_019951	mRNA	4971.69	4700.75	4281.29	3326.83	2005.89	1145.09	650.007
IVGNm21217	AF373710,AK003572,AK003699,AK013852,AK085669,BC013535,NM_025842	mRNA	4962.44	5116.15	4680.89	4497.85	3686.95	2375.65	1221.78
IVGNm20296	AF393640,AK004171,AK136935,BC028307,NM_001083895,NM_026838	mRNA	4953.81	4865.07	3693.31	4354.4	3181.99	2745.16	2946.8
IVGNm26247	AF157497,AK003576,AK012357,AK088132,AK149040,AK159582,AK167381,AK168824,AK215951,BC003866,NM_013933	mRNA	4947.81	4539.69	3826.92	2964.22	1196.76	508.07	277.964
IVGNm01818	AB009392,AK006480,AK144684,BC027206,BC030461,BC099683,NM_177301	mRNA	4915.34	4578.39	4882.83	4457.14	2594.57	1487.66	594.978
IVGNm04489	AK003413,AK018510,AK045905,BC019533,NM_026502	mRNA	4903.75	5106.99	4219.01	3269.21	1892.8	837.261	446.309
IVGNm05230	AK004554,AK035443,AK083343,AK145536,AK150487,AK150589,AK150991,AK152865,AK153079,AK153150,AK153204,AK159135,AK159668,AK159775,AK160047,AK166529,AK166586,AK167148,AK167891,AK168568,AK168771,BC005557,BC080806,BC108386,NM_023735	mRNA	4896.09	4782.93	4863.93	3468.05	2061.84	1091.6	717.738
IVGNm02786	AK007955,AK007968,AK018570,AK076316,AK149763,AK170628,BC019518,NM_001168667,NM_001168668,NM_026342	mRNA	4894.48	5274.79	4208.35	3913.24	3000.66	2317.87	1440.47
IVGNm16914	AF004106,BC003328,NM_001190449,NM_016765	mRNA	4886.59	5136.41	4206.01	2903.95	1045.24	434.304	369.139
IVGNm06125	AK040391,AK044954,AK088018,AK167404,BC002178,BC026722,BC033275,BC057971,BC072658,NM_053119	mRNA	4885.21	4659.87	4747.1	4826.9	3924.29	3172.54	1267.44
IVGNm15153	AB044414,AK003493,AK019174,AK145982,AK159635,AK168813,AK212788,BC020034,BC057446,NM_021535	mRNA	4875.02	5087.38	4200.84	3105.95	1361.6	439.406	217.643
IVGNm04938	AK053296,AK132380,BC072601	ncRNA	4863.57	4809.86	4046.18	3823.65	2994.09	2298.99	3114.31
IVGNm22366	AB001539,AK077611,AK210248,AK210821,BC008121,BC028896,BC083143,NM_153419	mRNA	4837.44	5227.09	2220.36	665.339	277.352	199.597	177.864
IVGNm10173	AK003449,AK019262,AK141302	ncRNA	4837.1	3759.58	3045.79	2240.33	1764.93	1844.65	1648.16
IVGNm33464	AK003192,AK003286,AK160697,BC028523,BC079614,NM_026729	mRNA	4830.29	5399.38	4418.15	3925.42	2411.87	877.861	451.758
IVGNm11017	AK010612,AK028264,AK030751,AK083821,AK146109,AK149931,AK151109,AK151418,AK153012,AK153249,AK159177,AK159475,AK159509,AK160889,AK167794,AK169140,AK212503,BC043053,BC049114,NM_009503,Z14044	mRNA	4828.66	5487	5683.16	5379.21	4043.9	1904.96	601.886
IVGNm12730	AB221674,AK010543,AK154739,BC016231,BC053382,NM_022011	mRNA	4812.28	5115.16	3815.01	2266.73	979.462	655.67	539.272
IVGNm24018	AK002403,AK151205,BC056170,NM_007793	mRNA	4805.21	5429.38	4368.58	4328.6	3899.04	2381.88	1067.5
IVGNm14129	AK088135,AK148031,AK165207,BC075663,NM_008062,Z11911	mRNA	4803.82	4704.45	4440.06	4177.89	3191.87	1654	578.093
IVGNm15987	AB232605,AK014268,AK031143,AK132072,AK132159,AK147122,BC010722,NM_017382	mRNA	4801.42	4028.4	4050.98	3228.76	1532.38	494.906	224.974
IVGNm24405	AK004206,AK009358,AK013835,AK158822,BC029256,NM_001122960,NM_026070	mRNA	4788.79	5302.19	3831.09	3529.69	2636.74	1477.24	690.986
IVGNm09758	AK038520	ncRNA	4778.04	4723.65	3765.44	3551.86	2633.46	2394.6	1874.26
IVGNm17930	AK039195,AK122572,BC065168,NM_001164493	mRNA	4776.93	4214.27	2927	1793.02	890.97	636.281	453.409
IVGNm18134	AK141327,AK206957,BC003965,BC094389,NM_183150	mRNA	4775.23	4584.08	1997.32	1228.15	1065.57	1255.08	1738.83
IVGNm16916	AF052660,AK029807,AK051698,AK144211,AK150326,AK150887,AK150983,AK152101,AK167954,AK168712,AK219427,BC061123,NM_016792	mRNA	4764.66	4757.28	3712.13	2579.48	799.301	282.256	155.567
IVGNm33401	AK009251,AK012225,AK131937,AK162024,BC049636,NM_025305,Y10968	mRNA	4759.6	4704.07	4447.25	3069.1	1529.42	775.415	491.493
IVGNm16871	AK079144,BC002048,BC061109,D30687,NM_013541,X53451	mRNA	4754.09	5333.42	4618.18	4968.84	4345.81	3571.68	1835.56
IVGNm23374	AB024984,AK002475,AK076107,AK145663,BC001988,NM_019767	mRNA	4751.79	4855.2	4204.74	3240.17	1607.14	740.337	380.75
IVGNm05944	AK016667,AK076104,BC002156,NM_024240	mRNA	4747.63	5303.06	4334.36	3295.07	1524.34	659.683	336.746
IVGNm17458	AK135450,BC024406,BC024862,BC053690,NM_001159421,NM_001159422,NM_198645	mRNA	4747.44	4418.21	3061.51	2098.79	1232.28	1049.6	1110
IVGNm32281	AK002379,AK147000,BC002322,BC006048,NM_010209,U72679	mRNA	4737.05	4756.54	4390.04	3255.23	1918.78	857.849	315.496
IVGNm28596	AK013062,AK189470,BC025016	ncRNA	4735.65	4214.93	3709.15	2829.37	1920.54	1032.48	699.658
IVGNm24894	AK136418,AK144139,AK166105,AK167973,BC068171,BC099966,NM_001030307	mRNA	4735.46	6195.19	5230.38	4443.3	3381.38	1940.72	1191.5
IVGNm20130	AK162564,NM_001080780,NM_009050	mRNA	4731.16	4340.39	3730.24	3101.83	2177.53	1318.92	642.161
IVGNm03455	AK160548	ncRNA	4725.31	4037.57	2916.37	2823.32	2822.3	2979.2	3575.53
IVGNm07029	AK017880,AK165884,AK187422,BC047370,NM_029720	mRNA	4723.15	5383.7	4229.22	3866.33	2901.41	2047.95	893.376
IVGNm05665	AK006350,BC049619,BC061180,BC099553,BC138995,BC145722,L32752,NM_009028	mRNA	4722.1	5302.05	4219.4	3740.66	2722.63	1488.2	547.149
IVGNm07065	AK007392,BC011218,M27347,NM_033612	mRNA	4721.06	5117.08	4282.1	4266.39	3685.01	3687.83	3013.68
IVGNm11207	AK012496,AK150638,AK152392,BC037193,BC038480,BC065074	mRNA	4714.98	4813.87	3376.61	2265.23	1172.23	719.67	518.879
IVGNm22712	AK028938,AK032997,AK040474,AK077866,AK087985,AK128976,AK134195,AK144874,AK145509,AK145545,AK146508,AK146947,AK149659,AK150136,AK150902,AK151487,AK151812,AK151945,AK152146,AK152447,AK152587,AK152826,AK153275,AK153936,AK155325,AK159155,AK159421,AK159514,AK159806,AK159829,AK163063,AK166212,AK166595,AK166596,AK166719,AK166747,AK166751,AK166758,AK166788,AK166815,AK166829,AK166851,AK166968,AK167081,AK1…	mRNA	4701.89	5105.34	6004.93	5844.23	5104.12	3771.04	1702.1
IVGNm15294	AK007491,AK134732,AK167070,AK168269,BC054723,BC062876,NM_026932	mRNA	4699.74	5480.82	3999.73	2848.65	1043.42	352.941	219.435
IVGNm22342	AK013190,AK146971,AK203551,BC002250,BC040363,BC058720,BC062102,NM_001114096,NM_001114097,NM_198160	mRNA	4695.31	5091.91	4581.44	4028.84	3104.74	2593.89	1634.23
IVGNm23204	AK154364,AK158282,BC021884,M98035,M98036,NM_001127355,NM_001127356,NM_010122	mRNA	4692.88	5261.21	3662.99	1990.12	659.705	390.42	294.582
IVGNm29325	AF334160,AK002819,AK005334,AK008600,AK010384,AK010502,AK011604,AK089023,AK166958,AK169032,BC016536,CT010237,CT010301,NM_024434	mRNA	4691.95	4820.45	4651.52	3636.98	2099.79	1101.72	458.299
IVGNm02484	AK003388	mRNA	4689.8	4444.45	3004.96	1563.98	781.722	587.46	461.446
IVGNm11905	AK007787,AK075744,AK077118,AK088728,AK093942,AK163218,AK179046,AK214972,BC013497,BC022616,BC024888,NM_026432	mRNA	4677.59	5090.88	4723.17	4414.79	3860.77	2816.55	1310.83
IVGNm11182	AK009361,AK154399,BC027328,BC056638,BC087949,NM_198095	mRNA	4675.71	5119.52	4006.24	3808.82	3340.63	3636.49	2638.46
IVGNm33059	AK052211,AK088481,AK139333,AK141546,AK145631,AK146538,AK150970,AK186000,AK206628,AK209790,AK214458,BC010210,NM_001159324,NM_008064,U49351	mRNA	4673.75	5237.9	5006.41	5244.21	5114.04	5331.97	5485.67
IVGNm32548	AK003668,AK012047,AK078165,AK167745,BC051926,NM_026519	mRNA	4665.64	5310.76	5014.29	4653.9	4247.06	3585.75	2110.06
IVGNm06698	AK012359,AK078555,AK150504,AK150627,AK150940,AK152274,AK159561,AK168199,AK168328,BC003731,NM_011695,U30838	mRNA	4664.66	4378.44	3907.01	3418.72	2212.69	990.575	379.367
IVGNm14890	AK002820,AK031499,BC145871,BC145873,M60523,NM_008321	mRNA	4659.12	3449.6	644.091	405.049	309.003	278.012	280.6
IVGNm15207	AK005340,AK007538,AK007720,AK010565,AK012281,AK020145,AK050505,AK084530,AK213548,AK214352,BC010214,NM_025448	mRNA	4657.77	4742.84	4896.58	4923.2	4231.09	4331.51	2236.69
IVGNm26285	AF004106,BC003328,NM_001190449,NM_016765	mRNA	4657.05	4917.82	4307.14	2939.15	1085.42	429.671	365.393
IVGNm11929	AK089053,AK090203,AK153236,AK167693,BC027356,BC035324,BC036289,NM_001130868,NM_053092	mRNA	4647.85	4659.37	5398.97	5384.78	4251.34	3036.89	1692.45
IVGNm23422	AF155362,AF271213,AK010316,AK145637,NM_023054	mRNA	4645.07	4456.91	1379.81	683.579	680.33	910.341	1225.53
IVGNm15722	AK159104,BC039963,BC061234,NM_001039514	mRNA	4643.94	5005.15	4335.56	3959.47	3286.33	2328.45	1107.19
IVGNm09608	AF033353,AK002536,AK011074,AK089081,AK159366,AK220052,BC082566,BC083158,NM_009460	mRNA	4632.69	4930.79	4178.53	3437.28	1972.28	864.268	528.654
IVGNm32851	AK005218,AK008527,AK027942,AK165423,BC048556,NR_015476	mRNA	4630.76	5884.88	4219.86	4279.41	3925.15	3130.22	1889.08
IVGNm30067	AK137202,AK137271,AK140457,AK142726,AK162543,BC055066,BC081549,X57780	mRNA	4625.56	9374.19	2905.36	1693.97	1275.43	1175.67	1127.27
IVGNm21853	AK012434,AK075960,AK146534,AK149632,AK151526,AK168789,AK178088,AK182094,AK207327,BC010601,NM_001164600,NM_028364,NM_133691	mRNA	4614.52	5082.64	4135.66	3136.51	1314.13	540.891	322.344
IVGNm08266	AK037196,AK136538,BC012276,BC025628,BC029714,BC034710,BC062912,NM_001035226,NM_134014	mRNA	4597.47	4214.17	3757.93	2860.91	1419.64	1046.82	705.158
IVGNm02923	AK013678,AK018744,AK147932,AK149570,AK150205,AK150338,AK150420,AK150717,AK150746,AK150881,AK151007,AK151162,AK151343,AK151713,AK151756,AK152048,AK152087,AK152118,AK152213,AK152705,AK152765,AK152944,AK153183,AK153269,AK153289,AK153418,AK153470,AK154492,AK159397,AK159428,AK159557,AK159809,AK160022,AK160033,AK160074,AK185467,BC037047,BC049943,BC129849,BC129850,M86736,NM_008175,X62321	mRNA	4596.47	4955.72	4859.15	5039.06	5078.36	4216.59	2782.96
IVGNm22385	AK032516,AK151841,AK159532,AK168273,AK178890,AK205378,AK206397,AK213033,AK214071,AK217181,AK217555,AK219621,BC079916,NM_007502,U59761	mRNA	4590.11	4932.69	3976.14	3624.5	2871.44	1960.35	1082.84
IVGNm08033	AK089053,AK090203,AK153236,AK167693,BC027356,BC035324,BC036289,NM_001130868,NM_053092	mRNA	4580.09	4939.05	5646.64	5426.87	4611.76	3162.91	1672.58
IVGNm16749	AK035821,AK035997,AK090102,AK159808,AK159955,AK183780,BC003887,BC095981,M29395,NM_009471	mRNA	4571.7	4483.23	3115.59	1372.28	394.506	206.319	164.002
IVGNm34680	AK010370,AK012890,AK040463,AK165537,BC011102,BC032180,NM_027191,NM_028334	mRNA	4567.08	4532.99	2736.78	1431.78	544.524	322.119	230.44
IVGNm34233	AF323178,AK002793,BC003425,BC069941,NM_023231	mRNA	4556.22	5544.75	4515.52	4267.79	2926.15	1392.28	389.293
IVGNm31878	AK041272,AK129093,BC037401,BC045524,BC058729,BC060139,BC060223,BC060531,BC060711,BC141333,NM_027513	mRNA	4552.38	4643.96	3690.04	3801.24	2438.68	1397.57	728.113
IVGNm02343	AJ001260,NM_008698	mRNA	4548.21	4922.84	4240.47	4032.71	3080.76	2193.22	1031.47
IVGNm01772	AF224264,AK084867,AK132141,AK139960,AK145582,AK146198,BC040827,BC058247,NM_139149	mRNA	4542.25	4892.2	3877.61	3365.84	1954.39	766.446	464.152
IVGNm16679	AK031908,BC028288,BC080758,J02809,NM_008083	mRNA	4531.02	4706.87	4988.6	4535.03	3959.35	3516.09	2737.3
IVGNm01813	AK050677,AK077507,AK153991,AK160644,AK160718,AK167041,AK167528,AK169224,AK169244,BC012411,BC012708,BC092265,BC094063,L76223,NM_011874	mRNA	4529.93	5249.32	4828.46	4251.17	2762.62	1463.88	598.517
IVGNm05034	AF276918,AF380337,AK005853,AK142654,BC065387,BC132031,BC132033,BC145303,BC145304,EU233993,NM_001038592,NM_001038593,NM_001038594,NM_023505	mRNA	4526.11	5027.08	3782.81	3422.95	2293.34	1118.87	640.865
IVGNm15467	BC029178,BC132266,BC132268,BC148404,BC153029,NM_138593	mRNA	4513.14	5037.21	4283.48	3587.87	2375.18	1390.19	852.966
IVGNm20975	AK009749,AK144464,AK144505,AK164021,AK180539,BC004613,NM_001190453,NM_001190454,NM_027151	mRNA	4506.76	4644.44	5392.01	5120.25	4291.16	3143.47	1782.68
IVGNm23958	AK079110,AK088741,AK129071,AK161608,AK161692,AK169491,BC029682,BC032973,BC034300,BC086624,NM_001025392,NM_001025393,NM_153787	mRNA	4503.94	4685.98	3044.44	1990.41	874.453	905.754	824.227
IVGNm04715	AK030252,AK030781,AK165182,AK166588,AK213560,BC024438,BC029037,BC037018,BC055456,BC172609,BC172736,NM_001081251	mRNA	4503.7	5011.56	4339.06	4148.61	3039.56	2247.86	1197.96
IVGNm23371	AF143859,AK142436,BC029325,BC043330,NM_019715	mRNA	4495	5096.29	3659.23	2618.47	1596.51	1401.14	1190.31
IVGNm11561	AK075619,BC013560,J04695,NM_009932,X04647	mRNA	4489.79	4390.47	4745.05	4389.08	4077.61	3220.67	2843.41
IVGNm26220	AK010599,AK011717,AK012775,AK171121,AK183256,AK184254,BC003876,BC014770,BC025053,BC029327,NM_001038608,NM_001042408,NM_178604	mRNA	4484.29	4380.96	2615.6	1358.42	668.179	426.501	385.741
IVGNm32436	AK011274,AK012944,AK013871,BC026794,NM_021335,X63020	mRNA	4464.83	4204.84	3722.1	2856.95	1476.38	636.549	445.602
IVGNm32392	AB041562,AF053550,AK005233,AK083055,AK087933,AK168000,AK168021,AK168045,AK169048,AK180612,AK208117,AK209045,AK211256,AK214537,AK214538,AK218920,AK220102,BC006641,NM_016804	mRNA	4462.09	3905.4	3844.38	2906.68	1635.86	726.29	257.974
IVGNm04960	AK014343,AK028748,AK078780,AK081012,AK132140,AK133885,AK151433,BC014293,BC043050,BC094350,NM_001083967,NM_013685,S75870,U16321,U16322,X91753	mRNA	4455.49	5227.99	4274.16	3680.98	2636.42	1939.45	1304.18
IVGNm04991	AK150790,AK150967,AK153419,AK159321,AK160102,AY989882,BC011306,BC054430,BC080756,BC151193,J00395,J00400,L23495,M14827,M23894,M23895,M23896,M23900,M60168,M60169,M69071,M69072,M69073,NM_001001892,U47328,X00172	mRNA	4450.76	4796.57	4605.44	4710.36	4339.76	4589.58	4406.54
IVGNm11893	AB028853,AK031858,AK077672,AK083208,AK163255,AK169169,AK211376,BC003420,NM_019794	mRNA	4450.62	3932.61	3394.02	2045.9	590.455	239.104	142.129
IVGNm33227	AF077858,AF250132,AF250135,AK011528,AK076448,AK086103,AK088042,AK161873,AK165670,BC005493,NM_011358,U14648	mRNA	4446.47	4706.62	4347.62	3842.9	2170.23	1660.64	1793.03
IVGNm16429	AK012440,AK090349,AK090391,AK154995,AK172353,AK206078,AK215943,BC036332,NM_153775	mRNA	4439.43	5694.74	4309.78	3589.87	2464.27	1756.63	1698.56
IVGNm33294	AB027237,AF177041,AK007716,BC012643,BC063780,NM_013777	mRNA	4437.63	4509.17	4101.46	3597.67	2812.01	1851.02	980.127
IVGNm13725	AB031387,AK077569,AK167840,NM_134138	mRNA	4419.77	4203.46	3815.43	2947.33	1641.93	601.321	354.723
IVGNm30341	AK003531,AK212046,NM_001159513,NM_001159514,NM_001159515	mRNA	4415.03	4757.86	4047.12	3999.54	3184.37	2941.38	1564.26
IVGNm04696	AK008549,AK088864,AK158539,AK167475,AK201189,BC024638,NM_019678,U94662	mRNA	4413.72	4542.87	3452.87	2384.79	1018.45	537.286	416.751
IVGNm24776	AK011491,BC067062,BC069962,NM_181470,U01139	mRNA	4410.24	4888.65	3612.52	2809.84	1170	476.531	272.708
IVGNm05166	AF123263,AK010271,AK012154,AK045432,AK076607,AK134799,AK165645,AK167945,AK168923,AK169621,BC002313,BC016428,NM_011811	mRNA	4405.25	4156.12	3811.5	3276.61	1910.03	964.087	492.744
IVGNm03627	AK002740,AK146239,AK153094,AK167860,AK168225,AK168672,AK169160,AK169282,AK169354,AK169671,AK189657,AK192648,BC092257,NM_011694,U30840	mRNA	4390.07	3570.65	4498.71	4238.16	3180.48	3048.04	1477.97
IVGNm03865	AK018779,AK077433,AK154191,AK154477,AK160289,BC013640,NM_001083891,NM_030087	mRNA	4385.12	5019.51	4260.34	4410.2	3836.29	3298.4	1349.55
IVGNm03298	AK134082,AK148883,AK220167,NM_008300	mRNA	4383.46	3958.24	3663.58	3128.35	2251.66	1195.99	529.126
IVGNm22774	AK033321,AK138079,BC094326,D12513,NM_011623,U01915	mRNA	4375.45	4728.42	3965.8	3250.67	1695.66	465.652	304.227
IVGNm34434	AK011290,AK077439,AK082484,AK178677,AK180988,AK182083,AK182659,AK193081,BC029621,NM_026364	mRNA	4375.44	4955.52	4054.6	3915.37	2846.62	1807.88	1058.59
IVGNm13936	AK084113,BC062955,NM_009955	mRNA	4364.82	4335.75	4278.13	3775.44	2435.87	1370.26	607.124
IVGNm07229	AK079754	mRNA	4354.42	4295.1	3576.78	4116.7	3721.72	3834.06	5873.1
IVGNm20993	AK002332,AK011364,AK147225,AY089967,BC010270,D00611,NM_001077184,NM_009768,S63813,Y16256,Y16257,Y16258	mRNA	4348.42	4875.15	4944.95	5122.51	4823.39	5218.14	5847.82
IVGNm14685	AK154127,AK154669,BC042885,BC053019,BC055316,NM_008842	mRNA	4340.43	3941.72	1331.97	674.039	497.739	446.749	417.249
IVGNm21629	AK077753,AK088184,AK129056,AK133857,AK136493,AK145445,AK146405,AK146425,AK150390,AK153911,AK167895,BC092233,BC094427,NM_007637,Z31555	mRNA	4338.71	4239.53	4149.85	3393.23	1837.09	676.613	240.466
IVGNm03937	AK014754.1,AK014754.2,AK018722.1,AK018722.2,AK019234.1,AK019234.2,AK029149,AK052649,AK084454,BC031496.1,BC031496.2,BC089534.1,BC089534.2,BC100330.1,BC100330.2,NM_001083938,NM_026611	mRNA	4336.94	4915.82	4242.47	4354.58	3744.51	3164.9	1515.87
IVGNm20413	AK003616,AK014824,AK037008,AK051537,AK078766,NM_001033474	mRNA	4334.65	3758.07	2780.17	1943.97	1171.38	874.841	746.074
IVGNm15269	AK002550,AK003682,AK013262,AK078396,AK168192,BC029189,NM_026395	mRNA	4331.02	4930.64	4016.35	3341.12	1841.84	843.075	501.991
IVGNm21223	AK003884,AK048669,AK154192,AK164964,BC042570,NM_176833	mRNA	4328.92	4346.78	3949.26	3379.49	2685.52	1449.06	725.288
IVGNm00941	AB074008,AJ278263,AK003503,BC079872,NM_001199227,NM_024289	mRNA	4311.42	3894.75	2936.54	1911.67	1308.49	896.695	739.324
IVGNm12065	AB183434,AK007894,AK166492,AY262012,BC116975,BC116977,NM_001127346	mRNA	4301.11	5018.59	3754.94	3110.1	2010.59	1145.44	748.71
IVGNm24749	BC039160,BC094502,NM_177613	mRNA	4300.59	4678.78	4101.76	3532.86	2746.67	1329.38	737.926
IVGNm29431	AK004235,AK159702,AK159983,AK180240	mRNA	4292.19	4566.74	3534.47	2364.51	877.929	458.243	302.484
IVGNm21879	AK083368,AK145657,AK146800,AK149013,AK151506,AK151900,AK162099,AK167128,BC050891,BC089334,D78647,D83037,D87660,NM_011740	mRNA	4290.85	3647.42	4128.61	4283.55	3399.94	2638.82	1418.41
IVGNm32497	AK003818,AK005296,AK006206,AK030567,AK161187,BC027160,NM_025442	mRNA	4288.41	4389.21	3716.17	2961.83	1788.39	928.867	387.347
IVGNm27357	AK013024,AK039136,AK137088,BC050936,BC106101,NM_198326	mRNA	4283.85	4268.37	4313.44	3430.79	2168.55	999.338	601.414
IVGNm33818	AK007547,AK012951,AK029365,AK051738,AK076002,AK089942,AK136049,AK140773,AK167559,AK168289,BC030432,BC037590,BC055457,BC090664,BC090980,BC100595,BC119136,BC119138,NM_178616	mRNA	4281.31	4281.36	3866.48	3159.55	2000.73	829.533	411.211
IVGNm26419	AF053232,AK044216,AK133959,AK134286,AK212676,BC076604,BC085135,NM_018868	mRNA	4280.42	6016.89	3744.86	2248.56	1092.34	629.719	607.463
IVGNm14190	AK098166,AK136556,AK147953,AK149886,AK149926,AK150194,AK152921,AK155075,AK167767,BC089015,BC089341,J02622,NM_010325,U82470	mRNA	4272.65	4965.38	4981.35	4891.13	4535.65	2582.01	1203.65
IVGNm24399	AK012457,AK012567,AK012853,AK014183,AK075962,AK160269,AK180685,BC023306,NM_025982	mRNA	4270.44	4848.2	4588.98	4225.6	2677.46	1168.92	484.549
IVGNm05000	AB359229,AK133985,AK162874,BC003819,BC044208,M35243,M35245,M35247,M35248,NM_010397,NM_010399	mRNA	4270.18	4489.61	4739.18	4752.57	4606.97	4780.66	5231.2
IVGNm11901	AK150754,AK151035,AK156241,AK161865,BC010811,NM_027338	mRNA	4268.33	4066.4	4385.79	3898.41	2766.15	1716.27	659.304
IVGNm09179	AK003340,AK011837,AK032370,BC034728,NM_001031808	mRNA	4267.43	4829.31	2919.27	1887.36	900.506	721.488	907.074
IVGNm14498	AF004105,AK037751,AK077801,AK088156,AK088378,AK129039,AK145176,AK146187,AK146375,AK198580,BC055318,D86725,NM_008564	mRNA	4265.48	4740.91	4443.66	4167.36	3195.58	1722.59	835.927
IVGNm17425	AK010599,AK011717,AK171121,AK183568,AK184254,AK187706,AK187751,AK189069,AK189366,AK198184,AK218707,BC003876,BC014770,BC025053,BC029327,NM_001038608,NM_001042408,NM_178604	mRNA	4259.27	4642.24	3783.65	2688.42	1637	908.769	533.621
IVGNm15095	AB020202,AK010936,AK010951,AK050133,AK077519,AK166976,AK167797,AK168056,AK168148,BC008610,NM_001033966,NM_016895	mRNA	4255.38	4281.17	4250.03	3921.41	2844.18	1913.06	838.755
IVGNm25159	AB232359,AK003457,AK013884,BC003442,NM_001164290,NM_001164291,NM_001164292,NM_001164293,NM_001164294,NM_001164295,NM_024192	mRNA	4251.55	4920.86	4716.63	4829.98	3863.18	2152.15	1057.16
IVGNm33310	AB232604,AF035646,AK008725,AK028320,AK087964,AK134988,AK146357,AK150319,AK150384,AK150791,AK151473,AK153315,AK153325,AK159383,AK159845,AK159988,AK160960,AK166010,AK168320,AK190935,AK193085,AK202554,AK212462,BC052735,BC056374,CT010394,NM_016676	mRNA	4251.09	4542.11	3176.18	1690.55	642.233	376.973	311.54
IVGNm20919	AK082623,AK136452,AK151646,AK153217,AK200301,BC046601,M60474,NM_008538	mRNA	4249.21	3977.34	3173.18	2574.48	1568.57	1036.78	686.846
IVGNm32973	AK032265,AK078033,AK154637,BC119621,BC119622,NM_001013375	mRNA	4248.46	3878.21	3236.52	1697.81	562.553	274.784	210.402
IVGNm26221	AK145891,AK145916,AK149885,AK150376,AK150470,AK151042,AK151182,AK151932,AK151988,AK152144,AK153434,AK167643,AK168038,AK172175,AK191745,AY424364,BC003288,NM_145422	mRNA	4242.57	4550.52	4177.3	3575.87	2174.74	939.454	483.023
IVGNm22310	AK032974,AK048174,AK080234,AK088804,AK128946,AK136550,AK150766,AK163933,AK190469,NM_010685	mRNA	4241.97	4155.07	3791.81	3973.66	3665.3	3696.76	2657.79
IVGNm02179	AK002674,AK146874,BC013536,BC052848,NM_008866	mRNA	4234.04	4139.46	3810.87	3605.79	2877.78	2837.03	1975.32
IVGNm15976	AB035420,BC139440,BC139441,NM_033607	mRNA	4229.82	4630.69	3529.06	3073.53	1762.59	819.378	480.842
IVGNm15952	AK144096,BC004730,CT010274,D85561,NM_013640,U77784,Y10875	mRNA	4224.86	4609.08	3702.36	3306.25	2439.61	1491.44	828.4
IVGNm13627	AK143260	ncRNA	4224.38	4298.71	3651.06	3678.59	3385.15	3832.8	3426.92
IVGNm16096	AK003134,AK003985,AK172066,AK188109,BC006594,NM_025396	mRNA	4224.22	5212.6	4369.17	4856.14	4163.56	2123.05	906.654
IVGNm33314	AK083908,AK143469,AK143487,AK149747,AK154016,AK155074,AK166533,BC004078,BC015070,BC048858,BC052889,BC060167,NM_016776,U63648	mRNA	4222.6	5147.89	4150.12	3309.72	1895.88	843.149	446.531
IVGNm18232	AB064543,AY633741,BC139772,BC145605,BC150801,NM_153144	mRNA	4220.14	4557.06	1900.16	1204.81	962.409	833.342	815.3
IVGNm34594	AK005192,AK013965,BC030319,BC033505,NM_026892	mRNA	4215.51	4571.9	3078.2	2334	1187.35	954.47	891.767
IVGNm04677	AK138457,AK161837,AK163502,AK180804,AK184033,AK189403,AK208956,AK209037,AK209538,BC042781,BC056361,D42048,NM_009270	mRNA	4214.45	4321.42	2340.86	1004.26	288.713	186.435	162.508
IVGNm15392	AK003313,AK008911,AK147058,BC006947,BC080673,NM_029814	mRNA	4208.67	3622.72	3750.38	3561.8	3263.07	3338.2	2436.83
IVGNm22300	AK146227,AK187803,BC028440,NM_172148	mRNA	4205.21	4813.92	2988.2	1768	787.016	424.091	352.283
IVGNm21679	AK030442,AK031776,AK076013,AK083928,AK088264,NM_001076789,NM_001110216,NM_007626	mRNA	4204.14	4313.18	3881.88	3765.09	2737.4	1609.69	799.912
IVGNm23248	AK158610,AK158644,BC042939,D85818,NM_011293	mRNA	4201.86	4520.73	3630.7	2953.36	1746.3	658.615	343.57
IVGNm18952	AK081759	mRNA	4191.83	3933.39	3212.25	3262.85	3209.01	3034.97	3641.38
IVGNm29527	AK013189,AK129104,AK166432,BC006707,BC007170,BC026608,BC049797,BC062111,NM_176979	mRNA	4191.62	3797.7	3200.56	2466.89	1485.02	1023	786.44
IVGNm24373	AK002327,AK010187,AK013559,AK150906,AK155429,BC082550,BC085178,NM_025535	mRNA	4184.67	3629.85	3541.79	3149.39	2547.68	1635.08	768.958
IVGNm31292	AJ279850,D10061,NM_009408	mRNA	4181.98	4462.38	3211.23	2403.93	1087.92	521.744	285.831
IVGNm15186	AK005247,AK014081,AK133585,AK156931,BC003465,NM_024215	mRNA	4180.04	4462.48	3994.81	3696.55	2621.72	1306.23	589.171
IVGNm30013	AK131583,AK131589,AK131591,AK131599,AK131866,AK154943,BC004586,BC006023,EF437370,X57779,X57780	mRNA	4178.82	4322.52	1486.81	759.308	516.604	319.592	221.44
IVGNm33503	AF521095,AK004878,AK159405,AK159912,AK166894,AK170330,BC020046,BC064753,BC156119,BC157111,NM_027896	mRNA	4177.5	4584.23	3388.65	2718.56	1677.58	1088.33	729.217
IVGNm33574	AK020026,AK046610,AK089083,AK168294,BC031464,NM_030057	mRNA	4171.14	3882.2	3424.11	2554.88	1449.46	759.924	477.711
IVGNm19166	AK009799,AK011481,AK011744,AK013528,AK030730,AK077795,AK139924,AK146243,AK150258,AK154024,BC021355,NM_024193	mRNA	4148.83	4397.26	3730.39	2803.79	1709.82	1075.98	940.736
IVGNm23696	AK003342,AK020128,AK020277,AK150689,AK163236,AK166585,AK190298,AK193342,BC010582,NM_133937	mRNA	4148.38	4284.34	4045.3	3974.9	3390.23	2664.24	1586.57
IVGNm14398	AK052249,AK077415,AK083421,AK156541,BC064454,BC108414,NM_010613	mRNA	4143.24	3971.32	2845.08	1967.7	1193.73	951.541	673.897
IVGNm09617	AB041589,AK010178,AK013172,AK017683,AK019913,AK122207,AK142041,AK214958,BC003481,BC055925,NM_021511	mRNA	4138.12	3544.24	1731.81	594.239	454.648	470.186	608.225
IVGNm34359	AK014226,AK122554,BC024823,BC024917,BC055032,BC067012,BC086672,BC094420,NM_026082	mRNA	4134.4	4075.11	3756.17	3405.62	2434.29	1509.56	679.587
IVGNm34461	AK002885,AK005133,AK146115,AK160123,AK168316,BC028878,BC099425,BC131925,BC131927,NM_023402	mRNA	4131.97	4561	3770.61	4204.44	4074.11	4607.74	4415.6
IVGNm30252	AK003794,AK004814,AK030554,AK088049,AK145632,AK155759,AK165454,AK167782,AK170826,AK171293,AK180509,AK189247,AK189775,AK209871,AK215937,AK216293,BC018274,BC023023,BC079854,NM_001168270,NM_133794	mRNA	4131.24	4791.41	3919.22	3470.91	2174.84	949.186	528.28
IVGNm32250	AK147740,AK152185,AK153388,AK153476,BC003716,D63423,NM_009673,U29396	mRNA	4130.3	4298.64	4051.15	4064.27	3785.34	3716.78	1872.53
IVGNm24047	AK053601,AK054211,AK133772,AK148883,AK155305,AK166102,AK220167,BC003770,BC003950,D85904,NM_008300	mRNA	4123.9	4295.76	3133.42	1983.32	674.26	240.195	148.86
IVGNm16126	AB086655,AF477481,AK012041,AK017609,AK028287,AK049163,AK076527,AK083015,BC013842,BC024485,BC048076,BC086955,NM_026014	mRNA	4121.94	4567.17	2123.69	1066.89	540.78	400.489	330.627
IVGNm07100	AK075979,AK077324,AK153033,AK162075,BC014686,BC023787,BC027012,NM_134081	mRNA	4121.73	4526.79	3890.92	3454.41	2364.42	1379.13	598.26
IVGNm26267	AF043120,AK088064,AK153352,BC006675,BC010842,NM_015827	mRNA	4116.99	4709.16	4031.33	3703.34	2544.62	1074.54	435.681
IVGNm26486	AB024303,AK010313,AK011772,AK011783,AK087556,AK090012,AK154139,AK159672,AK162789,AK182419,BC068164,NM_019748	mRNA	4112.87	4344.57	4279.69	4061.72	3030.32	2181.71	1108.09
IVGNm33095	AK012447,AK150419,AK169120,BC066995,BC086893,NM_008705	mRNA	4112.28	5087.59	3866.95	4342.34	4320.63	3765.23	2111.79
IVGNm22353	AK003974,AK182370,AK188003,AK207880,AK209436,AK210324,AK213398,AK217195,BC008543,BC024632,BC062108,NM_133949	mRNA	4111.47	5163.09	4393.85	4324.84	3642.49	2479.16	1871.82
IVGNm05370	AK077533,AK144470,AK146350,AK151027,AK151897,AK152304,AK152562,AK153256,AK153299,AK166009,AK169247,AK169716,BC008638,NM_145507,NM_177445	mRNA	4106.99	4145.38	4041.58	3419.57	2317.27	2336.37	1673.86
IVGNm06935	AK007336,AK082928,AK088658,BC020050,BC034270,BC049895,NM_026911	mRNA	4103.85	4254.8	3574.57	3318.44	2965.51	1588.71	879.473
IVGNm03581	AK007623,AK014035,BC048542,BC117077,BC117079,NM_026982	mRNA	4093.26	5252.88	3869.6	4235.6	3791.13	2793.66	1276.77
IVGNm22645	AK005988,AK011700,AK141272,BC050071,BC147188,BC147189,BC147710,BC147721,NM_001109747	mRNA	4091.06	5286.89	3902.75	4076.21	3227.31	1807.86	881.7
IVGNm07128	AK028062,AK075613,BC011343,NM_144846	mRNA	4087.45	3714.74	3773.68	3311.82	1641.27	1000.44	526.634
IVGNm24773	AK030296,AK045504,AK078070,BC065693,BC083160,BC099617,BC156404,BC172696,D45205,NM_009453,NM_178794	mRNA	4086.23	6569.52	4201.49	3579.84	3151.4	1919.42	1409.63
IVGNm32560	AK002501,AK088337,AK160888,AK182945,AK185633,AK187309,AK206263,BC027270,BC119267,BC119269,NM_026688	mRNA	4086.1	4380.46	3888.17	3408.31	2185.21	1002.77	363.382
IVGNm04474	AK031801,AK050627,AK146182,AK150674,AK159971,AK169753,BC013785,BC051450,NM_010724,U22031,U22032,U22033,U22034,U22035,X64449	mRNA	4084.6	4629.32	4066.55	3815	2674.21	1128.4	563.38
IVGNm16176	AK007589,AK088037,BC049678,BC050938,NM_026964	mRNA	4080.22	4544.59	4380.6	4563.92	4085.5	3335.45	2437.22
IVGNm04075	AK050719	ncRNA	4073.69	3567.32	3006.64	2727.45	2153.63	1808.91	1988.32
IVGNm31186	AF148638,AK146382,AK168228,AK170635,BC050209,BC057160,NM_134058	mRNA	4073.24	3254.17	644.003	408.519	445.237	444.739	587.266
IVGNm06541	AK011743,AK036653,AK088796,AK089999,AK135422,AK135619,AK141132,AK141644,AK146662,AK151499,AK157725,AK220442,BC013094,D26089,NM_008565	mRNA	4069.61	4261.26	3615.38	3046.05	1751.38	584.449	261.84
IVGNm33390	AF469648,AK002484,BC002093,BC002096,BC007149,CT010309,NM_024223	mRNA	4054.87	4357.16	4370.54	4455.19	4350.36	3784.24	2938.59
IVGNm15433	AK003431,AK179341,BC008110,NM_080559	mRNA	4052.07	4442.99	3816.2	4036.49	4004.56	3696.12	3784.54
IVGNm28847	AK037499	ncRNA	4048.12	3866.05	3085.85	2910.15	2295.86	2017.13	2046.56
IVGNm24217	AK008043,AK011500,AK151641,BC002106,NM_012060,X81816	mRNA	4045.99	3635.8	3842.6	3828.38	3546.3	3957.24	3304.02
IVGNm31570	AK144399,AK196231,BC023379,BC047133,BC057892,BC100446,D45208,NM_016801	mRNA	4037.83	4244.12	3670.93	3374.15	2559.71	1851.98	1313.07
IVGNm22361	AK030972,AK036747,AK037789,AK043024,AK049342,AK075851,AK150053,AK173137,AK209672,BC026135,NM_009163	mRNA	4029.81	3787.87	3600.52	3202.89	2517.32	1830.66	910.255
IVGNm05250	AK003273,AK004433,AK132757,AK135885,AK210936,AY017214,BC019484,NM_026123	mRNA	4026.92	4240.19	2384.95	1176.62	471.403	334.387	309.988
IVGNm23066	BC128022,D83698,NM_007545	mRNA	4026.86	3708.22	3082.95	4033.15	3795.12	4186.36	5981.8
IVGNm15951	AK140209,BC059725,NM_013603	mRNA	4025.15	4164.3	3551.57	3756.3	3653.04	4919.3	4152.14
IVGNm07387	AK014046,BC038868,BC147794,BC147795,BC147835,BC147837,NM_028448	mRNA	4022.41	4422.7	4285.09	3881.51	3244.72	2141.99	1229.41
IVGNm16018	AB031292,AK003522,AK011282,AK012816,AK154228,BC083078,BC092095,BC119088,BC119090,NM_019755	mRNA	4021.92	4380.81	3698.49	3776.14	3162.72	2434.07	1490.63
IVGNm18537	AK012596,BC031886,BC049363,BC057030,NM_028307	mRNA	4012.67	4442.48	3292.21	2813.51	1935.8	1476.77	936.084
IVGNm24794	AB073672,AF326337,AK034902,AK194422,AK206171,AK220511,AY102280,AY102281,AY102282,AY102283,AY102284,AY114152,AY114153,BC032192,BC032272,BC056373,NM_024226,NM_194051,NM_194052,NM_194053,NM_194054	mRNA	4012.44	4324.84	3992.64	3689.62	2349.95	1416.38	689.429
IVGNm04403	AK029907,AK153973,AK160851,NM_027060	mRNA	4010.48	3408.1	1606.49	806.987	434.68	334.558	233.555
IVGNm25305	AK077521,AK145704,BC019968,BC024478,NM_134139	mRNA	4003	4860.49	3169.62	1995.81	957.037	586.342	469.251
IVGNm20583	AK028313,AK077274,AK077723,AK088013,AK150641,AK150729,AK150870,AK151088,AK151518,AK151887,AK152006,AK152292,AK152341,AK152713,AK167197,AK168129,AK168580,BC004030,BC018161,NM_133668	mRNA	3991.51	5170.08	4154.46	3898.53	3125.3	1465.58	507.526
IVGNm05999	AK002306,AK003324,AK008604,AK012166,BC003916,BC083330,DQ196315,DQ196316,NM_026304	mRNA	3987.97	4187.89	3518.54	2932.49	1865.15	931.335	577.293
IVGNm17499	AK028341,AK132157,AK153335,AK160982,AK166146,BC008570,BC010624,NM_134040	mRNA	3987.57	4296.95	4739.21	4357.72	3259.88	1820.57	872.209
IVGNm05737	AK051433,AK083912,AK089972,AK159211,AK160202,BC003447,NM_010219,X17068,X17069,X70887	mRNA	3986.39	4826.95	4811.73	4438.1	2966.47	1316.7	464.055
IVGNm14923	AK149077,AK161647,AK170919,BC025044,M16465,NM_009112	mRNA	3984.33	3765.26	3597.62	3412.72	3000.1	2275.36	1495.7
IVGNm21049	AK088369,AK089998,AK093881,AK135637,AK145607,AK145802,AK148150,AK148152,AK148545,AK149785,AK150331,AK150645,AK151034,AK151173,AK151230,AK151234,AK151251,AK151525,AK151529,AK151686,AK151852,AK151875,AK151891,AK151907,AK151943,AK152117,AK152126,AK152134,AK152203,AK152280,AK152319,AK152355,AK152408,AK152505,AK152557,AK152605,AK152819,AK153404,AK159108,AK159164,AK159167,AK159198,AK159221,AK159244,AK1…	mRNA	3980.87	4546.81	4639.99	5175.2	4753.36	5296.96	6734.42
IVGNm19204	AK017291,AK029571,AK160211,BC031395,BC065804,BC094436,BC095989,NM_001102423,NM_001102424,NM_001102425,NM_172675	mRNA	3978.13	4211.05	3622.63	3280.48	2756.34	2582.27	1983.94
IVGNm28614	AK013918,AK075941,AK076292,AK144177,AK152798,AK159311,AK159348,AK170645,BC013719,BC022675,NM_026011	mRNA	3972.39	3683.76	3531.62	2955.89	1930.69	908.887	521.649
IVGNm30300	AF130367,AK005762,BC079662,NM_001122851,NM_011810	mRNA	3970.09	3708.38	3381.01	3076.65	2534.2	1703.52	782.16
IVGNm18344	AK135457,AK177110,AK177490,AK181774,AK182895,AK185497,AK185629,AK190155,AK194258,AK210053,AK212115,AK219692,BC025519,BC099494,NM_001030014	mRNA	3969.78	4213.22	1881.46	692.446	283.729	240.919	251.962
IVGNm14864	AK077651,AK081542,AK084267,AK148095,AK150683,AK177159,BC068132,D89063,NM_007838	mRNA	3969.1	4633.13	4377.39	4865.84	4568.38	4801.51	4713.73
IVGNm24793	AB073672,AF326337,AK034902,AK194422,AK206171,AK220511,AY102280,AY102281,AY102282,AY102283,AY102284,AY114152,AY114153,BC032192,BC032272,BC056373,NM_024226,NM_194051,NM_194052,NM_194053,NM_194054	mRNA	3966.95	4367.94	3907.79	3762.52	2358.04	1438.21	660.937
IVGNm32963	AF498263,AK017632,AK187293,BC079856,NM_001002929	mRNA	3960.54	4418.09	3930.31	3280.14	1982.93	1014.18	695.255
IVGNm04657	AK012084,AK083586,AK122356,AK145458,AK150429,AK161720,AK169809,AK207500,AK218141,BC057096,BC139420,BC139421,NM_138599	mRNA	3954.51	4124.49	3197.83	2303.31	802.345	278.112	161.248
IVGNm08813	AK034352	ncRNA	3951.67	3222.77	1998.2	1728.32	1371.94	991.913	892.138
IVGNm22356	AJ242777,AJ242778,AK156131,AK170841,AK206450,AK208160,AK217156,BC008186,NM_001199275,NM_001199276,NM_021327	mRNA	3949.5	3964.16	2721.02	1701.15	953.338	541.062	299.858
IVGNm30205	AJ748655,AK156309,AK166925,AK167131,AK168526,BC085179,BC119170,BC119172,NM_008323,U68564	mRNA	3947.67	4069.14	3916.01	3629.86	2823.52	1992.48	1144.81
IVGNm07079	AF412297,AK005636,AK093887,AK134592,AK146433,AK146853,AK151488,AK158904,AK159695,AK159724,AK164122,AK167970,AK168022,AK168678,AK168800,AK210138,BC008622,BC010224,NM_001199122,NM_078478	mRNA	3947.29	4087.43	3809.52	3983.64	3520.08	3110.14	1610.02
IVGNm33016	AF483518,AF483519,AK078167,AK147636,BC014748,M18775,M18776,NM_001038609,NM_010838,U12914,U12915,U12916	mRNA	3944.91	4489.92	3859.83	3672.71	3117.68	2369.3	1474.49
IVGNm03682	AK004233,AK168211,BC029284,BC098072,NM_001045529	mRNA	3939.45	3565.61	2315.96	1366.88	897.327	904.817	682.984
IVGNm23907	BC048709,NM_198622	mRNA	3939.21	4597.18	4255.85	4316.63	3462.68	1667.45	970.957
IVGNm02264	AK154417,BC096563	mRNA	3935.39	3722.76	3417.95	3247.71	2820.59	2647.82	1923.47
IVGNm23287	AF071314,AK003752,AK009955,AK167833,BC020461,BC116800,BC116826,NM_012001	mRNA	3931.67	3835.85	3612.32	2480.54	1128.31	455.968	315.677
IVGNm20351	AK008724,NR_028432	mRNA	3929.54	4369.17	3773.15	3934.72	3609.7	3481.77	2555.21
IVGNm14229	AB194412,AF027503,AF027505,AK032350,AK033227,AK047971,AK081387,AK147358,BC006889,BC060273,NM_001029850,NM_001083320,NM_010367	mRNA	3928.21	4316.5	2447.41	1373.39	929.14	793.579	626.752
IVGNm07291	AK002816,AK004378,AK009401,BC059905,BC092142,NM_183256	mRNA	3921.49	4462.6	3534.72	3510.88	3203.01	3095.38	2253.37
IVGNm02116	AK141392,AK167865,AY082486,BC002102,BC002160,BC084679,NM_030694	mRNA	3918.28	4059.78	3658.9	3474.7	2897.11	2117.52	1326.1
IVGNm21868	AK045250,AK077423,AK148012,AK161693,AK163266,AK166363,AK168350,AK168425,AK170256,AK170354,AK189699,AK199994,AK200625,AK209454,AK210063,AK212646,BC007171,BC036293,NM_145625	mRNA	3910.89	4396.9	3602.25	2550.27	1066.56	619.773	402.138
IVGNm23485	AF318060,AK003854,AK005681,AK007855,AK154249,AK201969,BC024941,NM_025895	mRNA	3896.84	3806.63	3445.82	3171.42	2381.69	1444.92	588.785
IVGNm07446	AK003596,AK043842,AK081139,AK083924,AK087446,AK088088,AK136295,AK150130,AK152060,AK167552,AK220221,BC029751,BC037652,BC046505,BC058225,NM_178627	mRNA	3871.51	4189.42	3031.36	1895.54	811.191	530.622	397.806
IVGNm31012	AK051573,AK141735,BC020992,BC037159,BC045135,BC052015,BC057015,BC089345,BC094335	ncRNA	3868.36	3537.15	2907.51	2544.21	1627.55	1019.89	425.633
IVGNm23447	AK048732,AK050445,AK089113,AK139561,AK161688,BC002284,NM_024478	mRNA	3867.69	3302.28	3331.7	2294.54	1138.51	501.883	181.355
IVGNm05846	AK128914,AK145877,AK146413,AK168851,BC008119,NM_016978,X64837	mRNA	3861.66	3587.74	3955.87	3753.11	2688.57	2048.58	823.287
IVGNm29868	AK050621,AK164255,AK165466,AK169778,AK212444,BC028551,BC048705,NM_001039519	mRNA	3854.88	3650.73	2962.95	2770.5	2020.68	1495.33	934.963
IVGNm15011	AK078006,AK168680,AK169847,AK185499,BC004578,D00812,NM_011284	mRNA	3853.76	3999.73	3073.86	2346.62	1358.82	433.079	201.985
IVGNm01884	AF126717,AK028042,AK030889,AK088679,AK146677,AK152360,AK159433,AK165158,AK166104,AK167699,AK169326,BC012041,NM_007415,X14206	mRNA	3850.21	4372.93	4348.36	4386.31	3406.38	2142.27	764.464
IVGNm15017	AK014418,AK157860,AK167113,AK184666,AK203744,AK214240,BC005715,BC068152,D50461,NM_011341,U45977,U45978	mRNA	3842.73	4010.14	4240.05	3958.64	3862.58	3527.39	3255.76
IVGNm10981	AK017628,AK157423,AK187296,BC011293,NM_027460	mRNA	3841.26	3453.39	3039.25	2276.9	1226.46	655.33	316.355
IVGNm07268	AK077523,AK167183,AY181025,AY185498,BC018560,BC037996,NM_153547	mRNA	3836.86	3248.99	1810.68	944.654	658.737	700.358	780.542
IVGNm05237	AK003070,AK003897,AK011260,BC021936,BC055109,NM_025388	mRNA	3831.47	3139.87	3410.53	3203.7	2818.38	1772.89	631.743
IVGNm23784	AK028119,AK050367,BC046757,NM_172541	mRNA	3829.23	4095.57	3686.31	2938.86	1414.17	627.454	313.024
IVGNm06986	AK010668,BC019603,NM_028597	mRNA	3827.65	4236.18	3419.29	3312.72	2449.61	1240.75	439.735
IVGNm35445	AK129104,BC006707,BC007170,BC026608,BC049797,BC062111,NM_176979	mRNA	3820.66	3457.24	3288.26	2558.27	1492.87	1002.9	700.62
IVGNm06931	AK004406,AK042913,AK154047,AK189411,AK219880,BC016260,NM_001164607,NM_001164608,NM_026859	mRNA	3819.14	4471.65	3229.7	2359.28	1155.23	672.789	467.177
IVGNm04460	AJ005253,AK002238,AK004024,AK145765,AK147719,AK168053,AK177819,AK179220,BC001998,NM_017393	mRNA	3813.76	4536.85	3510.59	2893.68	1936.97	939.185	397.59
IVGNm31680	AF071314,AK003752,AK009955,AK167833,BC020461,BC116800,BC116826,NM_012001	mRNA	3812.2	3932.24	3460.24	2448.27	1063.06	462.113	310.865
IVGNm22877	M17518	mRNA	3807.64	4355.85	3659.77	3610.42	2567.4	1486.14	525.378
IVGNm31947	AK003350,BC066163,BC066848,BC096666,NM_144530	mRNA	3799.66	3379.64	1981.36	1208.55	723.385	666.576	513.298
IVGNm01020	AK007753,AK008089,AK010168,AK160267,BC035323,BC046908,BC147300,BC147301,NM_027215	mRNA	3795.14	4504.93	4021.05	3917.8	3086.32	2120.74	1422.96
IVGNm28037	AK003513,AK053979,AK090278,AK169385,AY764247,BC072563,NM_001001880,NM_001083897	mRNA	3793.04	4128.77	3454.4	3026.28	2061.47	1344.66	850.245
IVGNm12597	AK088176,AK134899,AK148903	mRNA	3790.74	3748.77	3023.68	2594.52	1435.67	718.274	423.621
IVGNm15739	AK013312,AK076122,BC008247,CT010286,NM_007630,X66032	mRNA	3790.67	4150.42	3464.45	3219.68	2457.71	1596.57	834.955
IVGNm25975	AK012786,AK012948,BC006929,BC017374,NM_011634,U77844	mRNA	3786.37	3707.47	1966.73	1218.47	878.209	823.859	790.081
IVGNm14825	AK012772,AK015041,AK082815,AK162147,BC020127,BC023165,BC148404,BC153029,NM_138593	mRNA	3784.64	4586.19	3302.26	2894.67	2339.15	1319.58	728.87
IVGNm06516	AK132390,AK142034,AK164408,L38607,NM_008242	mRNA	3777.25	2927.74	1419.91	751.168	574.472	708.287	761.604
IVGNm01923	AK148173,AK218527,BC003823,M62419,NM_007456	mRNA	3771.99	4169.06	3870.21	3817.4	2822.92	1775.32	820.378
IVGNm07617	AK017926,NM_029083	mRNA	3769.13	3538.29	784.48	515.718	379.777	352.659	346.565
IVGNm00020	AK004088,AK078823,BC019548,BC023199,NM_145542	mRNA	3768.66	3602.04	3608.62	3386.53	2306.37	1553.87	894.413
IVGNm12755	AB232589,AF312037,AJ310532,AK014050,AK014132,AK079574,AK148904,AK161006,AK164316,AY026947,BC114335,NM_023852	mRNA	3766.66	3562.59	3774.04	3460.32	3027.77	2408.2	1168.47
IVGNm30195	AF134238,AK043834,AK154202,AK164772,AK170756,BC009099,BC019473,NM_019704	mRNA	3764.3	3164.55	583.834	287.983	284.199	293.345	337.14
IVGNm01019	AK009725,AK083802,AK145004,AK154182,BC066115,BC085472	mRNA	3763.88	3633.89	2246.24	1737.56	1384.59	1294.98	1115.16
IVGNm17043	AK004231,AK077414,AK078697,AK088479,BC004617,NM_001163763,NM_001163764,NM_025674	mRNA	3762.86	4102.88	2711.52	1512.9	761.25	583.562	590.015
IVGNm03052	AK019206,AK039540,AK048511,AK145974,AK146752,AK150394,AK150600,AK152545,AK159905,AK167174,AK167394,AK167942,AK168468,AK168565,AK169058,BC019601,BC053391,NM_001042565,NM_019653	mRNA	3758.13	3381.07	1853.26	1142.61	931.238	1066.94	1229.45
IVGNm07260	AK002696,AK003769,AK013251,AK088248,BC012213,NM_178605	mRNA	3752.11	3985.09	4062.39	3397.86	2289.22	1088.96	393.665
IVGNm04708	AK010337,AK083655,AK146688,AK206909,AK208506,AK217102,AY099096,BC012261,BC030938,NM_028868	mRNA	3750.63	3948.11	2997.93	2240.95	1329.69	1094.12	1013.8
IVGNm24999	AK010424,AK159504,AK160594,BC003839,BC005427,BC021638,GU182318,NM_008562,U35623	mRNA	3747.77	4211.93	1745.06	712.984	347.562	290.055	310.333
IVGNm01055	AK013840,AK082775,BC003932,BC054744,NM_030240	mRNA	3743.9	4217.61	1962.53	934.255	522.259	498.002	500.604
IVGNm01672	AK013213,AK147938,AK167965,AK168978,AK181696,AK184248,AK184459,AK188605,AK201828,AK205790,BC026606,NM_027276	mRNA	3743.27	3816.12	3769.42	3333.14	2011.08	931.051	453.3
IVGNm24375	AK007804,AK010210,AK012376,AK031513,AK088618,BC027628,NM_025541	mRNA	3742.43	3199.33	1420.34	606.516	284.107	248.038	262.59
IVGNm32704	BC002253,NM_133839	mRNA	3729.53	3909.17	2893.75	2079.56	1117.99	565.147	398.038
IVGNm23429	AK005079,AK014648,AK019228,AK168847,BC003849,NM_023248	mRNA	3715.32	3338.77	3194.35	2816.18	1832.63	1044.46	547.857
IVGNm00721	AK010555,AK148729,AK167835,AK168844,BC147498,BC150966,BC150967,BC151198,NM_001081094	mRNA	3709.55	3602.7	2532.02	1259.01	440.093	302.923	225.263
IVGNm05696	AK155376,AK165569,AK168334,AK168727,BC055900,BC085281,NM_009532,U02887	mRNA	3709.54	4242.74	3745.02	2956.97	1697.06	919.515	663.255
IVGNm07773	AK010395,AK077225,AK078834,BC058779,NM_172429	mRNA	3708.49	3148.2	2263.68	1379.11	576.486	408.437	402.99
IVGNm33388	BC002181,NM_024210	mRNA	3707.59	3676.91	2910.65	2652.92	1872.51	1485.24	1394.97
IVGNm10766	AK008283,AK077668,AK135402,AK147133,BC051012,BC052920,L37092,M58633,NM_007661	mRNA	3700.43	7058.05	5350.65	3945.06	2579.73	1238.94	919.337
IVGNm28422	AK002470,AK011781,AK082937,AK165836,AK167959,AK209754,BC028537,BC061029,BC115580,BC115581,NM_001145781,NM_026683,NM_028250	mRNA	3699.12	5104.41	3652.13	2595.89	989.899	441.049	318.843
IVGNm11614	AK081524	ncRNA	3693.28	3759.89	3192.69	2773.87	2388.55	2293.24	1695.14
IVGNm15171	AB037685,AK012759,AK049647,AK076049,AK147888,AK159446,AK168380,AK172146,AK181796,AK195817,BC005690,BC080684,NM_023210,U89345	mRNA	3691.87	3557.59	3799.21	3402.03	2361.56	1433.04	891.245
IVGNm24117	AK010432,AK011363,AK147785,AK152316,AK152645,AK153174,AK169229,AK210213,BC132075,BC132077,NM_009458,U57690,X96859	mRNA	3686.41	3785.23	2984.14	2559.94	1948	1454.17	1117.01
IVGNm32567	AK007452,AK139511,AK152374,AK159596,AK167696,BC028787,BC031845,BC058229,NM_026934	mRNA	3685.65	4013.53	3605.51	2406.87	948.489	343.349	221.122
IVGNm14555	AK002362,NM_010864,X57377	mRNA	3679.91	3272.5	3587.18	3254.96	2785.67	2631.36	1989.55
IVGNm10768	AK135889,AK161629,BC039767,BC052322,NM_011213	mRNA	3679.87	3841.94	3207.19	2840.55	2367.3	1838.31	861.345
IVGNm01804	AK014776,AK028375,AK030758,BC082565,NM_178856	mRNA	3673.53	3919.71	3369.17	2840.77	1995.07	1240.75	606.945
IVGNm33306	AK002321,AK135614,AK155502,BC089604,NM_015786	mRNA	3672.62	3429.21	2450.71	1913.93	1238.5	822.225	866.699
IVGNm32563	AK003722,AK136186,AK160740,BC147032,BC147033,BC171983,NM_026785	mRNA	3668.16	4180.47	3140.51	2672.32	1612.48	750.497	521.839
IVGNm35067	AK075743,AK082326,AK213047,AK218758,BC020044,BC058601,BC094233,BC139336,BC139337,NM_145514	mRNA	3663.51	4054.98	3189.66	2846.99	1982.06	1006.1	623.995
IVGNm06202	AK075922,AK084310,AK088033,AK205411,BC003427,NM_145588	mRNA	3661.11	3585.97	3050.57	1939.51	918.598	612.464	565.836
IVGNm07999	BC057902,BC120637,BC120639,L76155,NM_001128597,NM_032460	mRNA	3659.18	3423.16	713.476	481.961	412.401	454.992	537.748
IVGNm23695	AK029923,AK052130,AK132750,AK151899,AK152003,AK153867,AK194149,AK213098,AK217962,BC002175,BC016080,BC085483,NM_133933	mRNA	3658.41	3411.89	4082.61	3728.09	3210.03	2716.52	1625.41
IVGNm04558	AK146214,AK162337,BC008155,BC096050,NM_145410	mRNA	3652.54	3749.12	3470.65	2944.98	2070.15	1472.52	1377.8
IVGNm29474	AK007649,AK131142,NM_152822	mRNA	3651.82	4072.33	3210.39	2538.21	1331.41	746.932	464.478
IVGNm18821	AK003793,AK044157	ncRNA	3650.71	5464.27	3504.03	3715.55	3183.01	2915.38	4469.57
IVGNm28436	AF149291,AF465519,AK151576,AK167395,AK167922,AK171088,AK172892,AK195747,BC009076,BC049861,NM_178598	mRNA	3646.58	4264.46	4577.05	4818.53	4278.53	2927.67	1101.72
IVGNm07635	AK030743,AK150733,AK151141,AK151382,AK161646,AK168966,AK169324,BC009141,BC092058,NM_029157	mRNA	3644.68	4320.31	3276.58	2657.98	1301.63	545.877	371.826
IVGNm05349	AK034165,AK078767,AK152147,BC009154,NM_133826	mRNA	3643.92	3141.13	3200.06	2597.41	1428.71	437.562	231.209
IVGNm06000	AK009715,AK011011,AK160217,AK166410,BC031848,BC049558,NM_026330	mRNA	3643.24	3636.78	3311.01	2817.22	1556.3	517.28	224.411
IVGNm29290	AK005083,AK076874,AK146919,AK153413,AK168548,AK216249,BC005462,NM_011188,U61283	mRNA	3642.76	3620.52	3252.17	2137.93	893.675	331.462	201.168
IVGNm31323	AF377993,AF377994,AK008810,AK034173,AK155044,BC023172,BC025908,NM_145156	mRNA	3635.95	3351.9	1933.76	1661.51	1624.53	1827.57	2154.03
IVGNm06030	AK007386,AK088338,AK166985,BC028534,NM_026938	mRNA	3632.18	4203.01	3552.06	3506.71	3151.62	2369.93	1272.06
IVGNm17664	AB077209,AB077210,AK077743,AK154246,BC025539,BC051494,BC058357,NM_145830,NM_147151	mRNA	3631.12	3991.84	3878.87	3482.25	2772.81	2045.03	1647.3
IVGNm19282	AK088000,AK137001,AK147554,AK148989,AK150523,AK159279,AK159306,AK179604,AK184492,AK190341,AK190533,AK192723,AK193275,AK194308,AK194599,AK195465,AK196342,AK196933,AK196990,AK197399,AK197528,AK199916,AK200540,AK201496,AK201520,AK201612,AK203269,AK203283,AK203691,AK204314.3,AK205107,AK215026,BC010319,BC021496,BC023794,BC023964,BC025037,BC025618,BC025627,BC025811,BC029190,BC030326,BC031176,BC032187,B…	mRNA	3622.5	3066.96	3652.74	3745.28	2630.06	1959.53	825.164
IVGNm27016	AK030236	mRNA	3618.75	3716.81	1933.57	1039.81	457.933	320.592	349.626
IVGNm25048	AK153993,AK160208,AK161793,AK168643,BC028287,BC138541,BC138542,NM_001083188,NM_001199310,NM_010715,U04674,U19604	mRNA	3618.11	4012.01	3882.9	3362.45	2333.49	1036.53	538.11
IVGNm31656	AK045520,AK081440,AK157020,AK162461,AK171643,BC006855,BC020111,BC021476,BC023692,BC040791,BC051138,BC058585,BC085507,NM_001024616	mRNA	3616.47	6275.77	4514.88	3963.77	3339.72	2037.59	1377.3
IVGNm34919	AK133949,AK134696,AK155301,AK167731,AK204937,BC066005,BC145892,BC145894,NM_027933	mRNA	3610.5	4027.56	2529.15	1501.87	651.317	410.452	374.782
IVGNm30009	AK131583,AK131589,AK131591,AK131599,AK131866,AK154943,BC004586,BC006023,EF437370,X57779,X57780	mRNA	3610	3377.78	1192.78	624.235	405.601	268.255	187.634
IVGNm05867	AF088911,AK027923,AK144244,AK199030,BC001993,NM_019674,U79747	mRNA	3601.39	4065.71	4122.62	3605.44	2120.18	829.028	331.76
IVGNm13981	AK088131,AK133880,AK145495,AK153026,AK161022,AK161359,AK163872,AK163903,AK164263,AK180268,AK190532,AK190614,AK192833,AK193929,AK196155,AK196906,AK198542,AK201138,AK201280,AK201524,BC031506,BC060636,BC062978,D78503,D78641,NM_001109750,NM_010048	mRNA	3594.71	3942.41	2875.11	2110.49	1198.94	624.585	370.67
IVGNm31535	AK008435,AK009017,AK011072,AK034601,AK047969,AK076023,AK081613,AK088825,AK166383,AK186906,AK190884,AK211591,BC003828,BC051053,NM_009007,X57277	mRNA	3592.54	4295.98	3255.4	3184.18	1980.54	873.713	541.053
IVGNm18840	AK046059,AY035212,BC009022,NM_130884	mRNA	3591.7	3734.8	3636.34	3653.94	3283.87	3381.65	2450.67
IVGNm28595	AK005290,AK012421,AK012523,AK013257,BC022670,NM_026398	mRNA	3587.7	4107.31	2982.01	2381.72	1358.21	508.409	264.313
IVGNm30095	AK139939	mRNA	3587.28	3570.76	3034.76	2911.59	2191.13	1745.05	2439.52
IVGNm34191	AK005090,AK005441,AK010570,AK045059,AK146684,AK151135,AK154682,AK169017,BC006802,NM_025436	mRNA	3585.95	3488.75	2587.37	1758.71	894.382	401.542	210.975
IVGNm17187	AK154191,AK154477,BC013640,NM_030087	mRNA	3568.76	4344.49	3126.75	3073.82	2678.02	2274.37	1518.01
IVGNm32421	AB025406,AK078898,BC131926,CT010216,NM_019771	mRNA	3565.82	3119.34	3360.66	3397.86	2835.66	2827.83	1937.41
IVGNm00850	AK003607,AK013477,AK150483,AK168358,BC028659,NM_026784,NM_027348	mRNA	3564.8	3647.1	3357.62	2955.51	2173.27	1513.93	820.606
IVGNm26501	AK137997,AK172894,BC010489,NR_033443	mRNA	3562.44	3442.79	3643.22	3311.68	3055.11	2646.87	1379.37
IVGNm33747	AK042294,AK077543,AK166184,BC046751,BC055821,NM_001167669,NM_172561	mRNA	3559.78	3308.6	3356.96	2448.88	1236.14	438.835	243.014
IVGNm20495	AK017596,AK040861,AK156477,AK158707	mRNA,ncRNA	3559.3	3796.53	3542.87	2992.84	3220.9	3588.77	3725.68
IVGNm12551	AK088171,AK160094,BC005537	mRNA	3554.14	3047.45	3147.58	2869.7	2160.36	1540.43	722.84
IVGNm09461	AK141735	ncRNA	3552.75	3032.81	3502.02	3259.18	2417.12	1344.11	467.636
IVGNm04673	AK007694,AK179906,NR_028316	mRNA	3550.08	4245.13	2889.72	2846.62	2318.28	1811.79	1312.3
IVGNm13888	AK011691,AK011789,AK031877,AK036156,AK078050,AK133981,AK151356,AK151944,AK169259,AK185541,AK192227,BC005575,NM_023671	mRNA	3540.83	3277.95	3228.34	2768.95	1676.5	892.896	465.144
IVGNm25092	AB026432,AF159853,AK145328,AK146522,AK154303,AK155020,AK155920,AK157491,BC002210,BC009661,NM_015735	mRNA	3539.1	3779.87	3902.82	4030.36	3452	2420.07	1080.73
IVGNm02679	AK133949,AK134696,AK155301,AK167731,BC066005,NM_027933	mRNA	3537.12	3855.71	2309.58	1214.2	588.934	370.001	361.901
IVGNm10991	AB041805,AK005422,AK008759,AK011080,AK147032,AK148025,BC002315,BC021870,BC051683,BC053738,NM_020000,NM_173719	mRNA	3534.96	3576.07	2939.8	2114.83	1060.44	648.063	385.819
IVGNm30640	AK032295,AK048357,AK156203,AK165939,AK181076,AK187892,BC026562,NM_146047	mRNA	3526.91	3932.62	4081.84	4268.65	3542.32	2786.69	1492.94
IVGNm22060	AK042930,AK088768,AK129452,AK133905,AK145459,AK146670,AK159009,AK159525,AK159930,AK183983,BC014855,BC034011,BC052862,BC066213,BC071200,NM_001146174,NM_011241,U08110	mRNA	3525.6	4250.44	4285.37	4116.91	3457.66	2347.96	1185.11
IVGNm11184	AB051827,AK009513,BC020060,NM_133955	mRNA	3519.96	3077.22	1562.62	739.299	390.156	351.995	331.578
IVGNm16100	AK005090,AK005441,AK010570,AK045059,AK146684,AK151135,AK154682,AK169017,BC006802,NM_025436	mRNA	3519.82	3221.38	2566.88	1684.5	885.468	405.072	224.212
IVGNm14883	AF251787,AK005359,AK017863,AK029475,AK076021,AK201132,BC005713,BC021654,D63707,NM_008231	mRNA	3512.25	3985.69	4527.46	4621.95	3894.18	2683.98	1130.84
IVGNm10177	AK002526,AK003677,AK004827,AK146436,AK161967,AK162173,AK202642,BC017684,NM_025647	mRNA	3512.06	3438.95	3236.82	3281.59	2825.22	3087.04	2164.08
IVGNm33426	AK003966,AK012180,AK014470,AK152391,AK153139,BC019934,BC047125,NM_025710	mRNA	3511.37	3826.18	2976.39	2679.29	1687.16	911.373	412.154
IVGNm22322	AK049882,AK077253,AK147127,AK193332,AK194605,AK203229,AK212155,BC002208,NM_020050	mRNA	3504.78	4125.09	3347.7	3038.85	2768.65	2117.88	1233.71
IVGNm34211	AJ252147,AK002343,AK010287,AK217031,BC006869,NM_025550	mRNA	3499.19	3225.48	2957.46	1870.34	586.722	262.205	184.14
IVGNm21595	AK049372,AK051111,AK152092,AK166019,AK168906,AK170216,AK171725,BC020187,NM_009634,U20225	mRNA	3494.11	3884.67	3419.39	2936.59	1972.09	789.69	379.711
IVGNm12909	AF414433,AK007450,AK007562,AK007870,AK008486,AK040003,AK079975,AK082374,AK087666,AK088794,AK148649,AY157057,AY178580,BC005675,BC100533,NM_025461	mRNA	3491.01	4047.13	3246.18	3020.92	2589.36	1002.31	413.449
IVGNm31580	AK082836,AK129073,AK198439,AK200842,BC025526,BC032090,BC050199,BC056489,BC096591,NM_198304	mRNA	3480.84	4307.85	2874.44	2896.82	1901.77	1051.93	483.978
IVGNm18458	AK004270,AK079160,AK129214,AK134786,AK141486,BC050833,BC052455,BC057666,BC066203,BC090840,NM_009628	mRNA	3469.74	2463.31	764.717	412.625	308.122	981.425	275.89
IVGNm21282	AK008774,AK039123,AK083653,AK138504,AK212968,BC060295,NM_198246	mRNA	3469.53	3755.66	2405.39	1656.42	710.045	279.773	243.158
IVGNm08124	AK034772,AK088667,AK145248,AK166283,BC003842,NM_133787	mRNA	3466.88	2821	1450.22	520.981	255.577	216.465	152.421
IVGNm18233	AK028555,AK031620,AK038888,AK086996,BC026947,NM_001098810,NM_175004	mRNA	3464.81	3340.51	1279.01	397.39	170.329	160.018	219.447
IVGNm15947	AK002935,AK013509,AK047891,AK160097,AK190413,AK191508,AK192422,AK193438,AK193491,AK193563,AK193602,AK194077,AK194100,AK194423,AK196796,AK198114,AK198260,AK200461,AK201290,AK201472,AK201804,AK202236,AK202767,AK203132,AK204797,AK211938,AK212757,AK214717,BC010197,NM_013494,U23184,X61232	mRNA	3462	3968.82	3752.67	4153.99	4063.18	4426.13	5082.77
IVGNm32988	AK141598,BC048541,NM_001033212	mRNA	3457.31	3713.14	1331.79	543.168	345.293	319.081	478.761
IVGNm05669	AK082135,AK088043,AK137075,AK168586,AK213243,BC003299,BC016450,BC066217,K02927,NM_009103	mRNA	3455.25	3631.75	3406.38	2804.41	1516.15	543.855	260.741
IVGNm01806	AK019878,AK030833,AK031128,AK033202,AK132193,BC019985,BC068127,BC087944,NM_030233	mRNA	3450.02	3746.41	2988.91	2686.56	1812.54	1202.23	788.436
IVGNm30235	AK012563,AK088645,AK146096,AK150586,AK152561,AK160746,AK164507,AK165888,AK167894,AK168083,BC003327,BC004659,BC005763,D10024,M14044,NM_007585	mRNA	3449.91	4111.06	3627.46	3758.03	3478.17	3257.28	1814.36
IVGNm13267	AK004118,AK009412,AK010760,AK037009,AK135508,AK152322,AK162107,BC051932,NM_025527	mRNA	3447.7	4006.49	3045.17	2718.96	2025.79	1332.52	726.458
IVGNm05811	AK144309,AK150745,AK151637,BC039274,BC040391,BC043034,BC056387,BC057673,BC064810,BC092521,BC127064,NM_001040131,NM_013507,U63323,U76112	mRNA	3436.81	3653.7	3815.28	4317.41	3575.83	4109.62	3344.3
IVGNm13018	AK013363,AK019367	ncRNA	3430.04	3266.07	3178.38	3070.84	2548.6	2392.42	1613.97
IVGNm24400	AK011820,AK135916,AK160201,BC053434,NM_025995	mRNA	3427.98	2489.17	761.075	621.875	576.682	662.464	724.46
IVGNm27682	AK012559,AK045419,AK147014,AK220093,BC023847,BC027055,BC027247,BC039171,NM_148928	mRNA	3419.37	3638.74	2059.31	1130.69	507.075	312.838	296.118
IVGNm28579	AK009039,AK149893,AK166359,AK172114,AK172337,AK182301,BC026744,NM_177876	mRNA	3416.23	3247.27	1024.17	566.189	443.83	446.412	424.129
IVGNm11388	AK002890,AK008628,AK031533,AK087952,AK132434,AK145925,AK216345,BC021341,NM_026156	mRNA	3416.21	3762.99	2834.25	2249.16	1326.46	722.709	518.975
IVGNm19787	AF077330,AK032514,AK048148,AK159381,AK166655,AK168859,AY029181,BC002002,BC080776,NM_001111106,NM_011666	mRNA	3413.83	3383.47	3204.64	2570.5	1605.31	965.955	601.171
IVGNm10117	AK002953,BC014717,BC048249,NM_009129	mRNA	3410.85	2955.95	4120.67	3590.26	3417.67	3425.63	2564.02
IVGNm32631	AK005756,AK154580,BC028657,NM_029293	mRNA	3409.34	3320.86	3112.76	3306.49	3013.27	3246.94	2359.94
IVGNm26028	AK045004,AK088818,AK132034,AK135390,AK136999,AK149841,AK150088,AK166567,AK168872,AK169312,AK169353,AK169407,AK214521,BC014796,NM_033561	mRNA	3405.26	3819.82	3693.57	3423.45	2220.87	1108.18	671.314
IVGNm27598	AK004065,AK077787,AK087436,AK147089,AK149025,AK168922,AK168984,AK169720,AK178605,AK180183,AK182057,AK184334,AK198188,AK217688,BC006912,NM_007791	mRNA	3403.24	3946.16	3937.35	3539.75	2809.79	2384.49	1243.4
IVGNm12089	AK011216,AK031384,AK032043,BC016209,BC079583,BC088988,BC100547,NM_178620	mRNA	3401.06	3570.08	3046.29	2600.33	2042.61	1535.38	1009.08
IVGNm15424	AB041263,AK076290,AK088912,AK156254,AK169211,BC003307,BC057977,NM_053179	mRNA	3400.87	3704.94	3450.69	3516.9	2588.73	1300.2	562.027
IVGNm32419	AF176009,AK003100,AK007757,AK008463,AK008487,AK008712,AK011785,AK011814,AK011874,AK036823,AK075890,AK151553,AK161441,AK164169,AK184198,AK193084,AK215565,AK217615,BC002152,BC028929,BC038899,BC038916,BC065145,NM_019758	mRNA	3398.91	3502.3	2983.78	2577.56	1413.17	488.903	195.114
IVGNm24439	AK006207,AK184146,AK208947,NM_026617	mRNA	3395.07	4283.49	3135.89	3060.78	2256.14	1432.48	783.731
IVGNm18939	AJ310638,AK009057,AK079968,AK154266,BC055706,NM_027977	mRNA	3393.47	3507.31	3248.59	3203.3	2986.57	3470.37	3262.65
IVGNm06864	AK002299,AK010525,AK011934,BC025173,BC085282,NM_025547	mRNA	3392.47	2860.33	1554.63	674.705	488.451	441.932	509.639
IVGNm26316	AK003955,AK019025,AK051422,BC026206,NM_026618	mRNA	3391.05	3782.11	2842.18	2147.54	1027.28	376.829	202.548
IVGNm01745	AK004043,AK152526,BC023442,BC046763,NM_026827,NM_028389	mRNA	3388.29	4193.73	3312.51	2738.49	1406.34	694.974	475.725
IVGNm31161	AK012465,BC028642,NM_028281	mRNA	3383.44	3524.03	3255.45	2981.35	3108.74	2734.49	2012.14
IVGNm11822	AK003329,AK013870,AK075740,AK150289,AK153277,AK154712,AK159401,AK203783,BC004677,NM_026609	mRNA	3382.81	3795.49	2909.62	2544.36	1813.59	1119.7	729.159
IVGNm19627	AK028292,AK146288,AK148801,AK150566,AK161534,AK168447,AK169387,BC066857,BC141078,J05186,NM_009787,Y00884	mRNA	3382.61	3161.83	3801.52	3674.2	2954.36	3183.61	2571.83
IVGNm11114	AF124144,AK004335,AK038442,AK157327,AK170716,AK195490,AK197102,BC003256,BC040338,NM_011787	mRNA	3376.52	3337.69	3247.95	3012.7	2489.79	2115.49	1137.97
IVGNm34167	AK002385,AK003198,AK004149,AK012769,BC022104,NM_001168470,NM_025318	mRNA	3371.83	3786.35	2569.88	2064.9	1296.44	764.714	568.122
IVGNm06824	AB017634,AK006208,AK010533,AK011264,AK011738,AK012907,BC025084,NM_021886	mRNA	3365.74	3451.19	3261.64	2827.67	2089.38	1275.81	817.304
IVGNm28065	AK077073,AK082757,BC020361	ncRNA	3365.34	3391.79	2446.64	2025.36	1488.37	1411.51	1167.76
IVGNm25300	AK004462,AK081998,AK145461,AK166890,AK219156,BC005801,BC014869,BC023691,NM_133701	mRNA	3359.71	3794.4	2796.05	1911.03	745.12	341.224	257.706
IVGNm04920	AK007351,AK145833,BC024923,BC058335,BC085316,NM_001163431,NM_026919	mRNA	3359.44	3878.46	2982.24	3269.1	3043.5	2806.21	2311.02
IVGNm23458	AB049951,AK003008,AK007356,AK009568,AK134065,BC003890,NM_025450	mRNA	3354.27	3350.32	2652.71	2212.16	1393.3	762.986	685.655
IVGNm24247	AF233685,AK002368,AK013340,AK077735,AK088685,BC027517,NM_016763,U96116	mRNA	3351.16	2893.53	3188.93	2974.02	2521.36	1402.62	413.601
IVGNm05624	AK010744,AK090346,AK153252,BC012711,D49744,NM_008033	mRNA	3349.69	3463.95	2953.85	2415.46	1450.69	722.665	383.473
IVGNm22329	AK004000,AK079883,AK151813,AK193864,AK197335,AK209147,NM_001033142	mRNA	3342.43	3768.89	2749.14	2573.48	2048.55	1953.91	1584.74
IVGNm00374	AK041754,AK129359,NM_001163332,NM_001163333	mRNA	3342.35	2431.18	869.291	378.881	259.904	234.081	195.837
IVGNm31211	AK044523,BC119374,BC137729,BC144873	mRNA	3341.81	3357.8	2592.69	2536.17	1956.51	1698.69	1472.76
IVGNm15053	AF060090,AK078487,BC008265,NM_011970	mRNA	3338.33	3087.71	2722.76	2560.9	1482.85	591.636	231.243
IVGNm23502	AK005290,AK012421,AK012523,AK013257,BC022670,NM_026398	mRNA	3338.17	3765.98	2788.52	2170.03	1287.6	458.061	243.183
IVGNm22393	AK212328,AK219342,BC003238,BC054834,NM_008854	mRNA	3337.2	4101.94	3191.23	3399.01	3082.05	3115.25	2082.01
IVGNm32260	AK044924,AK135861,AK182616,AK187939,AK204936,BC052730,NM_009828,X75483,Z26580	mRNA	3334.97	3517.42	2395.74	1513.56	500.26	230.55	172.335
IVGNm22339	AF061263,AF104358,AK002492,AK086506,AK181801,AK187861,AK190495,AK190987,AK192277,AK193672,AK201146,AK202779,AK205611,AK211734,AK212982,BC003490,NM_018771	mRNA	3330.88	3756.97	3136.27	2868.37	1841.94	805.573	417.453
IVGNm16155	AK003788,AK019983,AK050373,BC014745,NM_026572	mRNA	3329.25	3139.45	3373.23	3267.04	2905.65	2188.31	1082.71
IVGNm31589	AK009714,AK145874,AK155871,AK172538,AK193199,AK197228,AK197501,AK205385,AK205721,AK207396,AK213442,BC037069,NM_025383	mRNA	3324.9	3194.01	2741.74	2641.09	2303.96	2033.84	1466.91
IVGNm34222	AB049960,AK007256,AK010268,AK011966,AK012126,AK012524,AK076130,BC021535,BC094621,BC100602,NM_025595	mRNA	3323.44	3318	2440.16	1645.37	790.004	387.43	301.105
IVGNm13443	AK008698,AK016474,AK080409,AK088255,AK167027,AK177781,BC070470,NM_026217	mRNA	3320.14	3214.31	2965.33	2644.94	2397.84	2084	1448.01
IVGNm16925	AF239728,AK007681,AK031942,AK209039,BC012274,BC016561,BC036276,NM_017404	mRNA	3319.86	3315.84	2626.33	1904.49	953.934	305.335	167.473
IVGNm01682	AF107838,AK051078,AK075936,AK081160,AK145654,AK163017,AK167169,AK171504,AK193895,BC029989,BC139184,BC139187,NM_011875	mRNA	3319.36	3242.81	3666.27	3197.58	1953.36	828.119	374.464
IVGNm25722	AK005307,AK005362,AK158727,AK161975,BC018451,BC053519,NM_001166399,NM_009001	mRNA	3314.31	3318.11	2521.51	2079.88	1601.47	1150.43	632.928
IVGNm19382	AK004040,AK014494,AK029034,AK031103,AK082580,NM_001164226,NM_010938	mRNA	3313.78	3072.88	1198.02	752.005	642.579	551.871	492.725
IVGNm34161	AF155362,AF271213,AK010316,AK145637,BC003213,BC016581,BC022994,NM_023054	mRNA	3313.51	3432.74	1103.23	572.206	585.07	728.044	947.472
IVGNm14217	AB003502,AK030760,AK032059,AK075996,AK145785,AK148603,AK210304,BC028325,BC031640,NM_001130008,NM_146066	mRNA	3312.84	3572.77	2910.02	2139.68	769.704	355.157	227.904
IVGNm32873	AK149291,AK173025,BC011390,BC023685,BC030856,BC055940,BC058608,BC063261,NM_177214	mRNA	3312.69	3370.55	2755.78	2793.23	2043.58	1162.77	409.824
IVGNm03748	AJ426432,AK011596,AK171648,AK201597,BC054522,BC067403,NM_011638	mRNA	3311.22	3307.92	2932.31	2762.11	2413.41	2474.49	2256.78
IVGNm11775	AK007737,AK010557,AK013111,AK014188,AK018191,AK028700,AK029523,AK076099,AK076866,AK081818,AK144671,BC030043,BC038013,BC049851,NM_026276	mRNA	3311.04	3208.26	2383.49	1416	660.17	425.021	335.822
IVGNm17704	AK077269,AK077933,AK079581,AK082807,AK146868,AK166014,AK181324,BC019120,EU561010,NM_033521	mRNA	3308.83	3121.02	3215.79	3123.95	2439.89	2027.28	1046.75
IVGNm23445	AK005061,AK008561,AK049672,AK164105,AK168464,NM_001159573,NM_001159574,NM_024183	mRNA	3306.81	3559.92	2312.13	1191.64	503.566	300.853	238.504
IVGNm11634	AK084136	mRNA	3305.23	2904.22	2690.14	2359.47	1965.09	1553.16	1641.52
IVGNm21926	AB028241,AB028736,AK158709,AK201751,BC026127,NM_013767	mRNA	3301.45	3710.35	3354.78	3039.82	2334.82	1057.76	566.703
IVGNm20306	AK005261,AK007816,AK010514,AK162053,AK168070,BC027260,BC048446,NM_026113	mRNA	3301.3	3552.19	2678.13	2093.91	1038.4	609.522	458.656
IVGNm01428	AK084607,NM_001168218,NM_001168219,NM_001168220	mRNA	3300.15	2778.53	1504.92	875.664	675.433	666.774	595.648
IVGNm14918	AK082419,AK166437,BC138568,BC138570,NM_009030,U35141	mRNA	3297.8	2751.07	3287.67	2685.23	1710.72	856.05	401.981
IVGNm27677	AK011735,AK031591,AK046288,AK049184,AK150029,AK160980,AK194585,BC006626,BC052852,NM_138748	mRNA	3292.63	3747.27	3645.73	3525.61	3314.42	2583	1725.27
IVGNm12780	AK040138,AK164760,BC018304,BC115843,NM_007625,U63387	mRNA	3290.73	2816.82	625.371	205.525	145.259	157.085	163.131
IVGNm24565	AF334104,AK030239,AK041281,AK213799,BC049906,BC055440,BC075714,BC090996,NM_053183	mRNA	3290.48	3088.29	2826.56	2062.03	1349.64	1064.2	885.305
IVGNm34213	AK010378,AK019404,AK019806,AK077565,BC049577,BC115465,NM_025555	mRNA	3288.04	3251.8	1981.37	1302.99	759.841	436.393	325.077
IVGNm05835	AK075938,AK146925,AK151765,AK152415,AK152977,AK163451,AK164826,AK165321,AK166133,AK168673,AK169168,AK180333,AK196708,AK212408,AK213535,AK218721,BC054768,NM_016682,U35833	mRNA	3284.01	3499.26	3253.27	2925.97	1833.28	983.235	334.88
IVGNm17274	AK011663,AK012389,AK131947,AK147011,AK182038,BC034867,NM_001045863,NM_001045864,NM_138580	mRNA	3280.45	3719.27	3476.18	2941.22	1835.25	920.031	482.588
IVGNm16068	AF235017,AK005252,AK014634,BC027513,NM_023247	mRNA	3273.56	3501.58	2855.48	2658.25	1759.71	822.671	407.615
IVGNm06785	AK002358,AK010917,AK147164,AK149855,AK167754,AK167925,AK168322,BC068182,NM_019913,U85089	mRNA	3270.68	3424.01	3435.27	3463.56	3461.32	2983.47	2329.82
IVGNm33636	AB158481,BC019652,BC051439,BC078446,NM_134028	mRNA	3266.65	3922.75	3140.78	2859.36	1892.12	941.116	409.788
IVGNm32120	AK049755,AK143197,AK146654,AK167857,AK168239,AK169043,AK169701,BC037232,BC080685,BC138411,BC138412,NM_001033300	mRNA	3259.77	3406.21	2246.59	1083.72	292.228	152.472	105.703
IVGNm26192	AB028241,AB028736,AK158709,AK201751,BC026127,NM_013767	mRNA	3259.69	3536.41	3381.9	2932.47	2369.62	1022.51	568.423
IVGNm06121	AK002709,AK156959,AK172481,AK189309,AK217510,AK218064,BC003482,BC083070,CT010285,NM_053082	mRNA	3259.48	3684.81	3064.06	2970.16	2542.21	1863.35	1086.25
IVGNm30340	AK003401	ncRNA	3252.43	2660.39	2408.03	2319.83	2097.65	2182.17	2225.96
IVGNm16150	AK009771,AK012437,AK155018,AK160507,BC010788,BC116622,NM_026481	mRNA	3246.96	3798.97	3475.11	3476.5	3485.28	3151.51	2787.25
IVGNm33316	AF035208,AF035821,AK002289,AK160624,BC002290,BC009810,BC080204,NM_016800	mRNA	3246	3308.02	2696.85	2147.32	1447.32	955.599	603.884
IVGNm22501	AK006977,AK033126,AK038129,AK049189,AK152588,AK159909,AK163491,AK169365,BC025034,BC055840,BC061010,BC080790,BC108356,BC145704,BC145706,BC166004,NM_029673	mRNA	3241.99	3947.98	3657.67	3146.65	2088.87	1025.45	356.742
IVGNm32379	AF150090,AK008088,AK013546,BC031448,NM_013899	mRNA	3240.41	3202.68	1789.89	1213.19	506.841	190.392	120.851
IVGNm24204	AK031918,AK146885,AK150811,AK151413,AK153550,AK159974,AK160093,AK160827,AK165975,AK168952,AK169090,BC010445,BC011439,J03297,M29652,NM_011631	mRNA	3234.51	3648.76	4510.57	4640.44	3365.48	2923.98	967.92
IVGNm32156	AK158811,BC006628,BC053333,BC071269,BC075733,NM_007682	mRNA	3231.32	3394.5	2066.11	1252.55	736.985	560.73	513.175
IVGNm14218	BC003822,BC046758,BC091763,J04632,NM_010358	mRNA	3230.31	3003.83	3120.13	2912.68	3123.15	3131.19	2708.23
IVGNm05959	AK003666,AK010684,BC048465,NM_025392	mRNA	3230.02	2928.44	3475.04	2961.02	2197.11	1482.37	631.549
IVGNm07179	AK088816,AK136259,AK143597,AK166686,AK167950,AK168502,AK168993,BC011478,BC080202,NM_172301,S43105,X64713	mRNA	3224.38	2698.06	2306.37	1515.56	644.033	470.164	395.498
IVGNm18436	AK083631,AK145019,AK155389,AK213250,BC020125,NM_177640	mRNA	3222.09	2382.31	2042.82	1375.03	884.712	548.083	395.082
IVGNm15769	AK011217,AK088713,AK172603,BC092397,BC119023,BC119025,BC144770,NM_008187,Z54179	mRNA	3219.62	3149.08	2530.61	2167.52	1379.89	644.318	403.87
IVGNm06789	AF170920,AK003206,AK003280,AK007523,AK008419,BC038049,BC096044,BC096677,NM_019979	mRNA	3217.84	3365.81	2885.81	2712.58	2134.6	1837.95	1579.99
IVGNm24198	AB017343,AB017344,AB041578,AJ011739,AJ011740,AK008558,AK075906,AK145552,AK147638,AK147685,AK150169,AK181638,BC025163,BC035269,NM_001161853,NM_011418	mRNA	3212.61	3356.6	2924.65	2127.05	942.363	356.878	265.05
IVGNm15788	AK033196,AK051795,AK088558,AK133826,AK187287,AK198449,BC090645,BC094416,D26090,NM_008566	mRNA	3212.53	3700.51	3252.91	2686.57	1698.98	669.913	408.747
IVGNm22935	AB055635,AB055636,AK031584,AK047089,AK129042,AK178752,AK196801,AK201559,AK203766,AK211769,AY389498,BC003979,NM_001081457,NM_001081458,NM_001135001,NM_012023,U37353,U59418	mRNA	3207.24	3530.26	3171.2	3182.44	2465.44	2055.64	1382.19
IVGNm33096	AF043326,AK146523,BC016526,BC021635,NM_008707	mRNA	3202.96	3790.2	2969.77	2481.93	1468.76	626.715	281.101
IVGNm31884	AF319547,AK010484,AK028274,AK031534,AK031679,AK147715,AK152989,AK155138,AK167603,AK168455,AK169255,AK170967,BC021900,BC043699,BC055026,BC062920,BC071251,NM_028041	mRNA	3198.66	3846.78	3426.95	2874.94	1802.66	713.854	426.029
IVGNm11164	AK007923,AK040625,AK085705,AK088268,AK128988,AK164199,BC011412,BC025459,BC025491,BC031197,BC042580,BC139015,BC139016,NM_133953	mRNA	3192.77	3389.43	3178.47	2737.15	1867.46	815.917	500.264
IVGNm33117	AB000121,AK133462,BC030169,FJ937966,FJ937967,NM_008949	mRNA	3191.37	3416.8	2516.33	2152.14	1295.7	547.558	256.603
IVGNm02496	AK035009,AK122527,BC056927,NM_173016	mRNA	3186.76	3738.31	3044.42	3251.07	2633.68	2152.17	1185.29
IVGNm03379	AK028966,AK075897,AK129245,AK144813,AK166760,AK168088,BC016483,BC031155,BC031910,NM_001130457,NM_134011	mRNA	3183.66	3125.15	2923.71	2656.12	1800.66	1238.8	946.341
IVGNm04113	AK077278,BC026648,NM_010806	mRNA	3181.84	2974.63	2461.04	1697.02	916.168	546.032	390.825
IVGNm14584	AK010762,AK011792,AK079209,AK146168,AK154749,AK155749,BC010719,NM_010914,X55316	mRNA	3180.02	3199.72	2329.64	1586.95	892.693	553.475	480.285
IVGNm34732	AK013981,AK146528,AK147169,AK150686,AK151631,AK152270,AK154658,AK159149,AK186409,AK205921,BC003843,CT010318,NM_133726	mRNA	3179.11	2882.66	3559.99	3115.25	1986.08	1415.02	530.752
IVGNm07045	AK019868,AK032967,AK152517,AK185892,BC010793,NM_030229	mRNA	3179.09	3633.73	3081.34	2244.98	1357.38	705.059	418.112
IVGNm07814	AK011521,AK145343,AK159848,AK163866,AK166670,AK168347,AK169101,AK171892,AK220299,BC005758,BC017539,BC035525,BC054785,BC065172,NM_001109913,NM_029804	mRNA	3173.51	2861.04	3633.03	2880.53	1646.97	729.348	361.66
IVGNm33324	AB027012,AK010340,AK011103,AK045694,AK088151,AK168716,AK179440,BC016602,BC050151,NM_016905	mRNA	3172.17	3640.63	3340.58	3357.27	2109.27	697.91	281.284
IVGNm32689	AK206849,AK215024,AK216020,AY035212,BC009022,NM_130884	mRNA	3171.53	3318.83	3535.05	3369.26	2899.98	2543.11	1470.1
IVGNm29413	AB019214,AF154120,AK076198,AK149850,AK154079,AK155746,AK161241,AK167177,AK167993,AK168742,AK189858,AK197557,AK201929,AK202656,AK203711,BC066044,BC066189,NM_019727	mRNA	3170.33	3276.58	3054.28	2576.52	1903.71	901.939	378.92
IVGNm25097	AK075988,AK088494,AK149493,AK161645,AK167273,AK168181,AK178711,AK181085,BC003794,NM_016737,U27830	mRNA	3167.73	3436.79	3738.56	3108.66	2010.8	828.646	451.867
IVGNm15738	AK018515,AK035311,AK132398,AK133656,AK135743,AK180997,AK196547,AK197664,AK202371,AK204053,AK219949,AY751549,BC043078,BC043481,BC048153,BC053065,M90364,NM_001165902,NM_007614	mRNA	3166.65	3454.89	3576	3537.98	2404.08	1288.17	512.287
IVGNm06859	AB049949,AK005206,AK019243,BC024656,NM_025440	mRNA	3166.45	3412.31	2407.36	1948.15	872.767	414.125	331.552
IVGNm23350	AF187079,AK049417,AK077461,AK147895,AK151284,AK151816,AK153142,AK164280,AK169256,AK171950,AK172519,AK192006,AK196464,BC008553,BC024686,BC024896,BC060744,NM_017477	mRNA	3164.96	3525.5	3266.35	3470.64	2611.65	1782.2	739.272
IVGNm14126	AB010282,AF483500,AF483501,AK088530,AK143570,AK146392,AK146394,AK146396,BC031422,BC051085,M38700,NM_010247	mRNA	3159.66	3489.7	3588.64	3026.86	1769.05	747.501	413.475
IVGNm21231	AB076382,AK004254,AK079270,AK088304,AK148049,BC086659,BC094595,NM_175134	mRNA	3159.39	3004.43	2730.41	2101.44	1118.02	578.29	536.174
IVGNm25253	AK083263,AK151513,AK152356,AK170061,BC099504,BC115750,NM_029711	mRNA	3155.13	3101.27	2960.14	2597.23	1938.89	1169.88	709.247
IVGNm32455	AF136277,AF197479,AJ242663,AK002710,AK004095,AK008370,AK010912,AK150329,AK150894,AK150947,AK151440,AK151585,AK151994,AK153147,AK159118,AK159618,AK159826,AK160001,AK160028,AK160354,AK166047,AK170963,AK184484,BC008619,NM_022325	mRNA	3153.49	3503.06	3493.1	3460.61	3381.75	3160.36	2523.98
IVGNm11899	AK137661,AK153931,AK159705,BC009816,NM_008925,U92794	mRNA	3152.64	3757.7	3787.41	3715.48	3494.32	3632.4	3090.36
IVGNm32418	AF159368,AK005594,AK075926,AK077308,AK137198,AK149182,AK168857,AK169689,BC019650,BC086778,NM_019745	mRNA	3151.36	2549.13	2242.22	1442.08	633.745	361.202	275.147
IVGNm16051	AJ005983,AK049760,AK078740,BC040206,NM_001142655,NM_021548	mRNA	3145.08	3398.38	2759.73	2521.78	1656.3	1040.3	786.391
IVGNm16293	AF329695,AK006708,AK012394,AK032369,AK159647,AK167964,AK168244,AK214915,BC043320,BC056978,BC060064,NM_054070,NR_028260	mRNA	3143.72	3308.53	3261.89	3017.86	2712.58	1834.01	947.55
IVGNm25254	BC051541,BC115616,BC115617,NM_029832	mRNA	3142.56	3599.38	3472.98	3256.78	2782.23	2018.08	1246.78
IVGNm33569	AK014070,AK044943,BC027793,NM_029825	mRNA	3139.99	3158.84	2487.13	1847.06	719.216	270.246	154.731
IVGNm34619	AK011360,BC052052,BC052699,BC080800,NM_026988	mRNA	3137.61	2936.13	3342.83	3523.11	2959.41	2190.44	1301.77
IVGNm25959	AK002340,AK146945,AK168393,AK169061,BC063753,L47550,L47552,L47553,L47600,NM_001130174,NM_001130175,NM_001130176,NM_001130177,NM_001130178,NM_001130179,NM_001130180,NM_001130181,NM_001136083,NM_011619	mRNA	3135.48	3566.63	3489.82	3452.82	3303.45	2905.38	1893.66
IVGNm01961	AF022223,AK009149,AK013611,AK154469,AK171094,BC003722,BC069918,BC093509,NM_001171739,NM_009736	mRNA	3134.7	3463.75	3320.34	3460.82	3349.11	3634.64	2791.84
IVGNm04449	AF118128,AK051034,AK088867,AK171507,AK179863,AY255786,AY255787,BC011067,BC024859,NM_019693	mRNA	3134.35	3422.48	3255.99	3224.87	2445.16	1043.6	507.955
IVGNm26484	AF041476,AK002724,AK090154,AK167905,AK169278,BC001994,BC094498,NM_019673	mRNA	3133.26	3291.91	3226.42	2768.81	1986.29	978.942	492.743
IVGNm16812	AK005106,AK005369,AK008194,AK008305,AK010863,AK010904,AK010962,AK011189,AK012617,BC013344,D17341,L10401,M27938,NM_010787	mRNA	3123.74	3593.86	3201.09	3027.42	2580.81	2051.41	1611.1
IVGNm30096	AK140219,AK140265,AK142736,AK153841	ncRNA	3122.12	6012.82	5305.9	5875.97	5849.47	6489.8	14137.6
IVGNm32551	AK011768,AK033555,AK140947,AK147056,BC049229,BC089458,BC108339,BC119347,BC120580,NM_026613	mRNA	3118.46	2827.34	2660.82	2342.48	1560.89	830.882	459.816
IVGNm24226	AF072248,AK185793,BC038264,NM_013595	mRNA	3118.33	3357.05	3302.58	2923.65	2611.41	1724.81	1366.74
IVGNm33382	AF298810,AK003446,AK146129,AK146448,AK147910,AK150981,AK152367,AK153250,AK165761,BC033457,NM_023721	mRNA	3113.36	2757.16	2891.15	2507.23	1795.16	761.27	242.908
IVGNm15092	AF044334,AK075993,AK076007,AK077197,AK080068,BC006750,BC052895,NM_016784	mRNA	3108.73	3366.23	2319.1	1439.15	447.783	175.527	92.7515
IVGNm31585	AK010622,AK028191,AK033114,AK158122,AK169906,AK171602,AK197937,AK202996,BC004656,NM_001205082,NM_016741	mRNA	3108.58	3906.26	2932.1	2877.91	1922.66	1039.58	411.782
IVGNm16576	AY601646,BC054725,BC057063,NM_207213	mRNA	3104.53	3192.18	2712.57	2412.38	1715.4	1197.24	735.894
IVGNm20578	AK021126,AK030316,AK045412,NM_001081124	mRNA	3103.93	3059.74	2883.62	2604.96	2222.99	1582.53	900.953
IVGNm30347	AK004260,AK019388,AK172180,BC023150,NM_029872	mRNA	3101.43	3768.59	3125.25	3248.58	2522.3	1847.9	818.326
IVGNm27913	AK037887,AK088252,AK090095,AK166210,AK185080,AK203138,AK213853,AK214020,AK215671,AK218533,BC010589,BC013801,BC035521,BC059260,BC103770,J02995,NM_001112703,NM_009594	mRNA	3100.71	2967.54	1292.8	728.538	585.502	526.583	427.727
IVGNm03470	AK050014,AK075771,AK075791,AK077853,AK149765,AK153951,AK161834,AK165494,AK166476,AK189168,AK215873,BC002318,NM_030248	mRNA	3093.04	3499.94	3166.02	2921.68	2023.75	1260.01	997.201
IVGNm23692	AK010479,AK012745,AK188692,BC019405,NM_133928	mRNA	3091.76	3261.78	2080.09	1201.52	495.981	239.921	167.83
IVGNm34479	AF295357,AK077904,AK078909,AK080795,AK082769,AK082781,AK145907,AK159811,AK167320,AK169715,AK187909,AK209059,AK211716,AY208935,NM_001159887,NM_001159888,NM_023429	mRNA	3090.7	2902.04	2614.33	2296.51	1707.49	906.517	481.282
IVGNm05040	AK005140,AK018319,AK151845,AK167537,BC027412,NM_007381,U21489	mRNA	3086.11	3000.17	2843.83	2521.44	1846.79	1182.21	441.064
IVGNm25181	AK012338,AK012817,AK076056,AK143553,AK145401,AK145434,AK166862,AK166866,BC003848,BC100539,BC113766,NM_026030	mRNA	3084.86	2878.35	2213.79	1557.86	830.458	325.038	218.272
IVGNm30385	AK007789,AK150657,AK152571,BC005643,NM_008102	mRNA	3078.21	3118.4	2816.41	2712.82	2094.85	1554.33	760.801
IVGNm22392	AK218577,AK219168	mRNA	3078.16	3524.48	2470.22	1634.15	726.277	322.701	217.475
IVGNm19343	AK002359,AK003435,AK008595,AK166685,BC029172,BC099423,BC125610,BC125648,NM_025947	mRNA	3076.3	3573.65	3146.55	3330.97	3046.68	2654.84	1468.4
IVGNm33145	AK077252,AK089933,AK145467,AK145488,AK153505,AK161632,AK164333,AK164593,AK165520,AK166683,AK166714,AK167005,AK167285,AK169690,AK183122,AK205568,BC003197,NM_009439	mRNA	3075.54	3527.41	3342.43	3068.21	2027.14	1020.7	591.963
IVGNm20065	AF096285,AK075804,AK077504,AK145971,AK147179,AK152283,AK154158,AK210373,BC141076,BC145342,NM_011499	mRNA	3070.97	3018.21	3056.44	2781.8	2100.02	1450.21	799.598
IVGNm11103	AK003379,AK015911,AK218503,BC008614,BC021321,NM_026350	mRNA	3068.15	3198.03	1625.69	961.167	554.672	403.08	300.202
IVGNm33396	AJ879914,AK004062,AK075748,AK077195,BC025087,NM_025275	mRNA	3066.08	3051.74	2988.77	3031.66	2296.34	1969.64	1556.19
IVGNm24285	AF089812,AF383148,AK133723,AK150417,AK153327,AK160527,AK160538,AK160545,AK163966,AK164074,BC026053,NM_019668	mRNA	3062.29	3432.17	2692.02	2446.64	1453.88	420.113	169.002
IVGNm08238	AK004379,AK035340,AK075569,AK141475,AK146218,AK155012,BC011147,NM_133968	mRNA	3056.97	3249.75	1464.97	670.949	327.458	248.302	195.995
IVGNm17536	AK087550,AK089268,AK165774,AK182068,AK186850,AK188998,BC009140,NM_134100	mRNA	3056.06	3431.4	1482.64	738.921	503.985	424.54	409.688
IVGNm20307	AK005495,AK157843,AK159239,BC005549,BC055365,NM_009120	mRNA	3047.21	2990.03	2856.39	2284.5	1408.9	677.764	497.433
IVGNm12905	AF279662,AK134563,AK151633,AK177217,BC059810,BC096017,NM_001163394,NM_001163395,NM_001163396,NM_007965,U72519	mRNA	3045.17	3466.83	3398.57	3546.28	3205.48	2869.67	2218.15
IVGNm25210	AK008988,AK010079,AK162073,AK171035,AK171079,BC056165,BC089369,NM_027332,NM_027371	mRNA	3044.01	2794.91	1931.37	968.126	324.023	165.08	105.571
IVGNm13951	AK089294,AK093885,AK150363,AK150364,AK150579,AK150622,AK150636,AK150694,AK150768,AK150946,AK151256,AK151275,AK151276,AK151374,AK151829,AK151962,AK152036,AK152045,AK152168,AK152187,AK152188,AK152406,AK152458,AK152567,AK152578,AK152593,AK152638,AK152680,AK152828,AK152881,AK152892,AK153191,AK153291,AK159097,AK159209,AK159440,AK159490,AK159512,AK159580,AK159642,AK159743,AK159896,AK159970,AK165227,AK1…	mRNA	3040.4	3045.36	3229.98	3376.53	3542.43	3209.62	4432.1
IVGNm34449	AK010349,AK010795,NM_001162855	mRNA	3038.17	3544.97	2774.07	2099.44	1038.78	398.742	215.142
IVGNm23394	AB030192,AK002519,AK003235,AK003817,AK013130,AK151737,AK168095,NM_020582	mRNA	3037.29	4130.58	3009.25	3194.63	3544.84	2523.51	1237.45
IVGNm33377	AK005191,AK005407,AK011516,AK208955,BC019673,BC082774,NM_023422	mRNA	3036.06	3561.95	2717.83	2665.06	2396.52	2089.26	1335.53
IVGNm17031	AK009521,BC027762,NM_025302	mRNA	3033.52	3093.2	2747.01	2084.58	984.455	327.722	202.718
IVGNm07495	AK004820,AK131910,AK157474,AK159302,AK160071,AK160076,AK161983,AY190302,BC057365,BC058735,BC092212,BC156650,NM_028782	mRNA	3031.15	3720.85	3769.13	3680.68	3194.08	2038.24	927.66
IVGNm27813	AK019106,AK020416,AK151549,AK191041,BC029205,NM_021433	mRNA	3029.85	3120.56	2436.83	2141.3	1476.87	1046.45	595.921
IVGNm25618	AF259674,AK032487,AK035361,AK049855,AK090108,AK145216,AK145672,AK152313,AK153093,AK162609,AK166880,AK167029,AK167044,AK168098,AK168216,AK169370,AK190781,AK204969,AK217111,BC004827,BC005657,NM_177420	mRNA	3028.82	3032.27	3409.24	3264.65	2517.74	1897.08	802.822
IVGNm13792	AK030778,AK049472,AK129337,AK166827,AK187070,BC006060,BC052715,NM_134137	mRNA	3028	2805.38	3310.35	2855.66	2217.36	1463.87	799.448
IVGNm31909	AK003268,AK011291,AK144436,AK219952,BC018401,BC027657,BC048854,BC055461,BC076562,BC096420,BC117034,BC117036,NM_001033134,NM_001190445,NR_033802	mRNA	3027.37	3423.74	2540.55	2048.58	1383.48	962.885	799.915
IVGNm22148	AF108718	mRNA	3018.98	2961.95	2319.44	2145.9	1693.04	1452.67	1447.58
IVGNm04614	AF129086,AK002752,AK004464,AK008742,AK045776,AK158595,AK166630,AK177504,AK180872,AK184249,AK197887,AK213284,BC020110,BC027427,BC038939,NM_019719	mRNA	3016.38	3287.88	3090.55	2769.14	2181.85	1381.63	991.563
IVGNm22476	AK010419,AK144741,BC022648,BC075711,BC117053,BC117055,BC152759,NM_001081406	mRNA	3016.22	2995.06	2493.85	2366.32	1816.8	1621.83	832.405
IVGNm32564	AK145261,AK150857,AK187098,AK195966,BC023119,NM_026796	mRNA	3011.61	3457.08	3388.44	3260.57	2759.24	1818.64	996.607
IVGNm15235	AK003486,AK004257,AK005184,AM162549,BC058279,NM_025902	mRNA	3008.3	3107.34	2519.85	2416.42	1929.41	1384.56	823.194
IVGNm23077	AF012709,AK010718,AK011399,AK040313,AK041138,AK053763,AK089033,AK182390,BC011038,BC012280,NM_007681	mRNA	3004.02	3194.68	2876.47	2595.86	1804.01	1292.63	939.887
IVGNm21489	AB003502,AK030760,AK032059,AK075996,AK145785,AK148603,AK194296,BC028325,BC031640,NM_001130008,NM_146066	mRNA	3001.03	3037.89	2612.76	1876.15	760.11	307.271	227.267
IVGNm23370	AB041582,AF061026,AK079712,AK133849,AK161638,BC023862,BC046326,BC055865,BC061115,BC061690,NM_019694	mRNA	2997.77	3654.86	2977.02	2449.57	1381.81	547.631	239.142
IVGNm17176	AK005379,AK077455,AK089107,AK162607,AK170104,BC027737,EF528576,EF528579,NM_029632	mRNA	2992.57	2850.95	2898.6	2231.31	1323.51	919.733	682.502
IVGNm28421	AK013116,AK129081,BC027537,NM_001163476,NM_027014	mRNA	2992.19	3170.45	2532.73	1683.66	702.063	296.025	186.605
IVGNm23702	AK154498,AK170887,AY424275,BC009086,BC055853,BC069880,NM_138587	mRNA	2987.73	2842.15	3047.72	2659.08	2297.46	1500.35	614.923
IVGNm02746	AK003613,AK078425,AK158876,AK213999,BC023041,NM_134020	mRNA	2983.11	3375.07	2844.66	2811.74	2327.24	2625.34	2184.83
IVGNm22572	AK012687,AK171830,BC037520,NR_027059	mRNA	2967.99	3380.3	3159.43	3275.26	3455.23	3397.96	4289.15
IVGNm13860	AK030231,AK051859,AK135516,AK168054,BC005614,BC024396,NM_007659,U58633	mRNA	2966.1	3937.82	2283.4	1932.18	819.761	296.748	194.925
IVGNm22369	AK002384,AK010513,AK010984,AK013558,AK020708,AK171718,AK211768,BC019984,BC094046,BC115455,NM_027179,NM_134118	mRNA	2965.79	3271.22	3041.05	3077.8	2892.84	2067.36	1458.26
IVGNm26456	AB003144,AF434712,AK076804,AK090323,AK147097,AK159650,AK163318,AK165301,AK165845,BC002213,BC010263,BC092052,NM_019648	mRNA	2965.02	2896.93	3064.54	2282.64	1190.83	562.65	276.597
IVGNm33560	AK006115,BC034668,BC038915,NM_001199843,NM_029601	mRNA	2962.85	3148.5	2758.8	2638.88	2240.4	2004.88	1321.86
IVGNm23432	AF295357,AK006013,AK007636,AK043603,AK077904,AK078102,AK078909,AK080795,AK082769,AK082781,AK145907,AK159811,AK167320,AK169715,AY208935,BC006937,NM_001159887,NM_001159888,NM_001159889,NM_023429	mRNA	2961.62	2969.03	2610.92	2179.89	1459.37	831.233	378.956
IVGNm04693	AK141548,AK172219,AK198376	mRNA	2957.4	3232.4	2756.04	2561.45	2122.05	1649.2	1048.03
IVGNm01784	AB221537,AK012635,BC062812,NM_027259	mRNA	2948.77	3681.96	2386.08	2067.93	1244.31	722.197	577.395
IVGNm15899	AF052621,AK042704,AK076710,AK143131,AK148190,AK161438,AK164130,BC009103,BC064090,NM_010926	mRNA	2947.35	3318.36	2679.01	2142.66	1269.53	430.052	191.709
IVGNm11584	AK075795,AK078309,AK160164,BC005503,NM_138668	mRNA	2944.58	2833.6	2753.55	2260.94	1560.93	658.894	436.161
IVGNm32617	AK009402,AK034483,AK079299,AK082783,AK144184,AK145993,AK167233,BC021451,BC051067,NM_028840	mRNA	2943.99	2870.43	2271.68	1733.87	1068.08	548.472	254.428
IVGNm04640	AJ279839,AK014371,AK032675,AK034842,BC033601,NM_152809	mRNA	2943.18	2671.79	2044.29	1190.51	585.748	427.484	344.83
IVGNm28934	AB057731,AK031851,AK045167,AK048744,AK049548,AK077192,BC002141,NM_024471	mRNA	2943.12	3182.09	2565.28	2145.6	1418.29	716.13	391.675
IVGNm13947	AB033122,AJ010483,AK133816,AK160658,AK165276,AK170133,AK171650,AK205661,AK214644,BC013702,BC015071,BC042425,NM_001198859,NM_001198860,NM_001198861,NM_013502	mRNA	2941.61	3197.53	2940.13	3101.86	2463.46	2002.56	1384.94
IVGNm22467	AK003044,AK007921,AK013723,AK142600,AK160089,BC008172,BC012971,BC019419,NM_001166480,NM_009279,X90582	mRNA	2939.85	3607.78	3005.56	3069.23	2418.11	1941.71	1384.28
IVGNm04597	AF007267,AK004631,AK166999,BC006809,NM_013872	mRNA	2927.24	3243.09	2866.77	2361.39	1337.29	644.545	288.39
IVGNm17189	AK046493,AK146063,AK146540,AK146864,AK147687,AK149776,AK150961,AK151354,AK152327,AK152965,AK159893,AK215092,BC026365,BC029745,BC049118,NM_030109	mRNA	2922.99	3613.27	3477.23	3090.68	2165.42	1031.08	462.323
IVGNm28276	AK010547,AK044690,AK077616,AK145147,AK145598,AK145719,AK145888,AK146274,AK206067,AY009405,BC050787,NM_025680	mRNA	2922	3400.35	3203.15	2657.24	1967.99	968.976	548.155
IVGNm15934	AK011777,AK143505,AK146362,AK150713,AK151233,AK151706,AK152691,AK159822,AK160569,AK166667,AK169129,AK169788,AK188995,BC010314,BC052671,M33934,M98333,NM_011830	mRNA	2921.82	3132.02	2794.23	1925.99	775.862	223.492	136.637
IVGNm34248	AK010547,AK044690,AK077616,AK145147,AK145598,AK145719,AK145888,AK146274,AY009405,BC050787,NM_025680	mRNA	2920.08	3297.43	3147.77	2885.68	1912.62	994.678	508.892
IVGNm23495	AK003551,BC019557,NM_001163316,NM_026269	mRNA	2919.31	3251.24	3272.44	3200.59	2217.9	1250.4	640.95
IVGNm01061	AF217090,AK006415,AK014205,BC061094,NM_023331	mRNA	2917.13	2811.38	1910.57	996.614	399.073	214.635	187.087
IVGNm04456	AJ504717,AK002780,AK003455,AY251016,AY251017,BC028491,NM_026308	mRNA	2912.73	3484.02	2770.02	2674.87	1944.3	1421.72	1138.24
IVGNm33265	AF071313,AK142318,AK169747,BC068179,NM_011991	mRNA	2909.36	2916.2	2622.35	2283.29	1179.89	512.58	266.768
IVGNm05204	AJ294535,AK146120,BC038649,BC058560,NM_001190984,NM_001190985,NM_021295,Y11550,Y16518	mRNA	2908.46	3257.84	2745.61	2774.2	2077.64	1373.99	648.458
IVGNm17512	AK142049,AK150781,AK169680,AK224911,AK224912,AK224913,AK224914,AK224915,AK224916,AK224917,AK224919,AK224920,AK224921,AK224922,AK224923,AK224924,AK224926,AK224927,AK224930,AK224933,AK224934,AK224935,AK224936,AK224937,AK224938,AK224939,AK224943,AK224945,AK224946,AK224947,AK224948,AK224949,AK224950,AK224951,AK224952,AK224953,AK224955,AK224956,AK224957,AK224958,AK224960,AK224962,AK224963,AK224964,AK2…	mRNA	2906.59	3089.28	2880.04	2839.76	2535.54	2388.25	2105.78
IVGNm17612	AK008402,BC026128,BC125297,NM_138607,Y18505	mRNA	2905.8	2985.48	2841.34	2017.76	952.017	347.771	300.628
IVGNm16049	AB039837,AK003458,AK140753,BC009170,BC057328,BC083336,NM_021538,U89427	mRNA	2901.43	3105.36	2786.28	2564.88	1895.28	1271.34	732.918
IVGNm21810	AK019636,AK141303,BC048354,NM_030046	mRNA	2897.04	3593.44	3044.88	2362.34	1329.38	595.52	283.621
IVGNm21235	AK004517,AK035384,AK049109,AK159755,BC017635,NM_026861	mRNA	2889.09	3041.84	2432.52	2214.28	1803.85	1562.05	1281.16
IVGNm16188	AB192471,AK017482,AK029405,AK076495,AK151735,AK168139,BC014706,NM_027439	mRNA	2887.48	2765.75	2754.59	2947.87	2501.72	2858.1	2181.3
IVGNm34476	AK003339,AK077948,AK151495,AK154811,BC025090,BC038524,BC115797,NM_026549	mRNA	2882.05	3378.55	1874.89	1058.76	348.297	184.191	148.629
IVGNm33375	AB037665,NM_001048057,NM_023372	mRNA	2880.81	4477.13	2964.88	3410.92	3899.38	2700.97	1365.51
IVGNm00960	AJ245569,AK005224,AK048609,BC022119,BC060230,NM_021494	mRNA	2877.26	2975.28	2695.62	2701.81	2172.03	1626.84	1044.23
IVGNm31440	AK012789,AK013227,AK080853,AK162257,BC025197,BC060969,BC110310,NM_025480	mRNA	2876.13	2963.27	2452.24	2251.57	1955.73	1621.25	982.217
IVGNm09319	AK078990,NM_138589	mRNA	2875.53	2913	2488.87	2220.21	1667.91	932.404	555.479
IVGNm26546	AF166383,AK002801,AK006571,AK008104,AK009814,AK011320,BC013468,BC145663,NM_020577	mRNA	2874.93	2927.13	2616.58	2301.52	1576.19	896.431	407.454
IVGNm12834	AK044802,AK051610,BC010687,BC024496,NM_145453	mRNA	2873.62	3089.95	1983.99	1239.67	654.884	469.288	402.19
IVGNm06857	AK002598,AK003396,AK007806,AK007833,BC027509,NM_025384	mRNA	2871.33	2941.15	2770.76	2500.48	1655.17	657.216	343.044
IVGNm17029	AK007302,AK010375,AK154232,BC026480,BC048362,NM_025291,NR_028355	ncRNA	2870.25	2961.63	2527.87	1860.53	844.567	439.121	322.106
IVGNm26481	AK005127,AK205455,BC027396,BC056992,NM_019712	mRNA	2870.14	3215.87	2846.78	2923.24	2142.41	1005.61	395.941
IVGNm31558	AK133872,AK146293,AK159519,AK190278,BC012039,BC029312,NM_026499	mRNA	2868.86	2992.54	2877.91	2377.11	1535.15	1063.8	944.555
IVGNm31145	AF326229,AF395811,AK010884,AK031538,AK160285,AK166235,AK167793,AK192546,AY993942,BC011255,NM_025965	mRNA	2863.95	2870.42	2850.86	2731.43	2378.02	2318.94	1620.95
IVGNm05966	AK006303,AK007769,AK008200,AK013310,BC027505,NM_025564	mRNA	2862.21	2724.66	1962.77	1398.49	906.68	825.62	1084.65
IVGNm28502	AK002488,AK003086,AK003250,AK010598,AK146994,BC056178,BC144958,NM_001081108	mRNA	2859.2	3206.6	2726.34	2785.34	2459.63	1751.6	1225.05
IVGNm11962	AK088997,AK144127,AK196493,AK220447,BC058587,NM_009859	mRNA	2858.59	3827.61	3231.31	2865.22	1909.47	1121.09	552.583
IVGNm14059	AJ879914,AK004062,AK075748,AK077195,BC025087,NM_025275	mRNA	2858.15	2753.44	2882.21	2714.57	2279.25	1707.82	1430.64
IVGNm29043	AK005083,AK076874,AK083989,AK146919,AK153413,AK168548,BC005462,NM_011188	mRNA	2855.58	2884.21	2599.84	1746.16	736.936	280.531	178.02
IVGNm11977	AK144455,AK146263,AK150862,AK168470,AK173318,BC018262,BC027399,BC068113,NM_011574	mRNA	2853.34	3167.87	2296.89	1611.36	745.316	452.827	297.011
IVGNm14524	AK008134,AK008249,AK011833,AK155859,AK157721,BC089023,BC115630,BC115631,NM_008612,U35249	mRNA	2853.23	3009.79	2190.14	1602.36	851.653	639.881	491.951
IVGNm28226	AK139350,AK167017,AK167116	mRNA	2851.84	2752.28	2113.23	1526.25	661.021	324.397	221.788
IVGNm00589	AK089573,AK150076,BC046776,BC057355,NM_207209,U66835	mRNA	2850.22	2540.3	1077.16	458.641	302.361	330.456	315.753
IVGNm16137	AK021194,AK075755,AK211187,BC034900,BC041150,BC054835,BC103793,BC117992,BC117993,NM_026277	mRNA	2848.86	2900.3	1807.99	998.893	418.522	260.729	180.987
IVGNm18453	AK003471,AK031101,AK128955,AK152720,AK155921,AK159488,AK160055,AK161981,AK164807,BC011295,BC029980,NM_012032	mRNA	2847.94	2942.23	2609.29	2397.36	2352.98	2173.68	1684.11
IVGNm19263	AK005356,AK009570,AK010075,AK011278,AK011382,AK011420,AK011466,AK011618,AK011872,AK012181,AK015978,AK078300,AK135670,AK168202,BC008259,BC081433,NM_028260	mRNA	2843.94	3036.46	2519.49	2308.15	1203.42	453.084	343.976
IVGNm14741	AK149021,BC046291,NM_001163588,NM_001163589,NM_013639,X15475	mRNA	2838.07	3443.7	3249.48	3597.98	2912.21	2093.5	1200.26
IVGNm01773	AK003424,AK007326,AK185158,BC010316,BC058379,BC132507,BC132509,BC145301,NM_025304	mRNA	2833.57	3027.3	2685.83	2374.87	1569.46	778.207	404.285
IVGNm32644	AJ413953,AK005174,AK044759,AK050136,AK083490,AK180346,AK185500,BC010713,BC046782,BC046786,NM_001165991,NM_001165992,NM_001165995,NM_029702,NR_028585	mRNA	2832.63	2893.7	2628.09	2404.4	1628.33	1004.99	734.515
IVGNm22932	AK028940,AK090096,AK132704,AK134552,BC060128,BC156654,NM_011112,U52197,U58134,U58135	mRNA	2827.13	3049.36	2299.86	1844.86	1386.87	1297.7	1074.6
IVGNm07388	AB070266,AK034757,AK052764,AK079420,AK144189,AK145407,AK150040,AK151281,AK160869,AK161852,AK164137,AK166671,AK168155,AK169705,AK181649,AK204874,AK209257,AK210966,AK211573,BC003451,BC058360,NM_145569	mRNA	2826.61	2928.41	2092.43	1481.09	1084.97	870.326	856.519
IVGNm23504	AK018508,AK021180,AK030793,AK050637,AK141554,BC020315,BC043921,BC061064,NM_026490	mRNA	2823.65	2997.55	1842.6	1091.62	513.468	301.277	239.304
IVGNm11783	AK011127,AK145471,BC116988,BC119035,NM_025924	mRNA	2820.81	3472.64	2969.56	2397.33	1448.73	692.638	427.036
IVGNm32647	AK028687,AK141072,AK148463,AK160986,BC003226,BC040802,BC058337,BC094679,BC141049,NM_029735,X54327	mRNA	2818.61	3326.03	2887.93	2755.8	2077.95	771.969	296.691
IVGNm29342	AK136165,AK154053,AK162121,BC025113,BC029631,NM_009193,U75680	mRNA	2816.68	2517.74	1506.65	525.952	222.504	195.039	203.953
IVGNm30390	AK009034,AK081363,AK082032,AK167772,BC006061,BC027288,BC042715,BC064132,BC065422	mRNA	2813.11	2587.99	1377.5	758.243	490.736	407.831	397.013
IVGNm07222	AK005101,AK083308,AK089890,AK144062,AK167629,BC012277,NM_175399	mRNA	2808.98	3079.81	1978.75	1052.01	395.651	182.185	139.701
IVGNm15697	AK079883,AK151813,BC131924,BC132281,NM_001033142	mRNA	2806.41	3437.34	2514.62	2873.27	2699.97	2663.58	1568.97
IVGNm30809	AF386076,AK002852,AK053619,AK077846,AK077941,AK135946,AK150747,AK150919,AY030406,BC018522,BC043461,BC043725,BC060371,BC116729,BC116731,NM_026550	mRNA	2804.93	3059.5	2541.15	2142.45	1189.81	461.543	215.594
IVGNm14266	AK088040,BC005468,BC010336,NM_010436,X58069	mRNA	2799.5	2818.04	1373.23	652.482	316.008	215.452	259.712
IVGNm12094	AF036898,AK011941,AK077592,AK172024,BC052170,BC063772,NM_011133	mRNA	2791.97	2600.42	1935.96	1149.48	670.42	469.908	441.359
IVGNm15213	AK002543,AK009245,AK151108,AK151400,AK152129,AK159961,AK167830,AK186063,AK215360,BC016519,BC090403,NM_025517	mRNA	2790.29	3006.63	2657.89	2429.19	1794.73	1287.75	690.163
IVGNm16712	AK164699,BC048741,BC061164,NM_008791,X17320	mRNA	2788.16	2783.18	2686.83	2670.39	2824.31	3063.67	3719.51
IVGNm17084	AK012128,AK146973,AK160356,AK172381,AK199456,AK212460,BC017625,NM_026530	mRNA	2784.41	3076.58	2896.39	2976.24	2822.51	2270.51	1432.36
IVGNm04501	AK013511,AK078351,AK146998,AK150404,AK151729,AK159460,AK166539,AK169143,BC030946,NM_028388	mRNA	2781.36	2812.06	2644.34	2043.17	1145.12	368.128	230.877
IVGNm14876	AK082767,AK152745,AK166198,BC006663,M24119,NM_001077411,NM_008094	mRNA	2780.59	2736.37	2581.58	2182.5	1909.29	1349.52	1052.81
IVGNm15465	AK028785,AK043837,AK076634,AK078313,AK139579,AK145356,AK151880,AK169708,BC013552,BC022143,BC026615,NM_134151	mRNA	2773.72	3047.98	2820.85	2433.58	1468.98	669.622	355.318
IVGNm23060	AY974568,BC132452,BC138756,D87902,NM_007480	mRNA	2772.71	2626.57	3070.52	3082.86	2516.18	1892.74	991.711
IVGNm30082	AK139000,AK153847,AK163440,AK167184	ncRNA	2768.03	2179.07	812.236	598.098	671.02	751.92	933.918
IVGNm12789	AF325354,AF348208,AK032309,AK163372,AK166711,BC005514,BC025431,NM_027000	mRNA	2767.23	4289.65	2580	1757.37	836.4	358.577	215.82
IVGNm14866	AK082867,AK146757,AK167097,BC010759,BC085087,M61731,NM_007917	mRNA	2761.73	2267.43	2284.97	1445.46	532.817	185.557	131.606
IVGNm16683	BC026834,BC031810,L36860,NM_008189	mRNA	2759.2	2781.16	2520.04	2561.35	2112.84	2034.64	1612.74
IVGNm02117	AK013133,NM_025579	mRNA	2758.73	2998.07	2362.06	1980.4	1128.05	562.371	363.03
IVGNm20378	AF503942,AK003262,AK005278,AK009510,AK011277,AK012504,BC062136,NM_025614	mRNA	2758	3208.66	2599.06	2363.9	1656.44	968.624	382.216
IVGNm21530	AK003483,AK019865,AK036782,AK036994,AK039762,AK049604,AK050299,AK088030,AK088683,AK159380,AK166935,BC005588,BC018591,NM_001171034,NM_001171035,NM_001171036,NM_026669	mRNA	2757.15	2971.95	2539.01	2515.94	1944.58	1712.35	895.694
IVGNm25996	AF003346,AK076011,AK168072,AK215206,BC011477,NM_009454	mRNA	2756.19	2864.45	2395.89	2276.71	1670.34	1244.08	807.873
IVGNm23453	AK002263,AK002889,AK003519,AK006643,AK145337,AK193067,AK213116,AK217481,BC016528,BC021941,BC032987,NM_025336	mRNA	2753.03	3147.68	3244.38	2827.65	1811.85	729.14	304.64
IVGNm23952	AK009485,AK208742,BC116435,BC116436,BC128508,BC128509,NM_001024919	mRNA	2752.98	3238.38	2815.77	2589.07	1921.38	1334.53	707.892
IVGNm29215	AK144300,AK150310,AK152710,BC019117,BC066831,NM_001109909,NM_001109910,NM_031405	mRNA	2750.33	2872.13	3287.58	3035.55	2495.34	1786.69	1122.17
IVGNm32726	AK144234,AK164618,AK166881,BC021485,BC021807,NM_144886	mRNA	2750.02	2936.97	2911.03	2605.64	2240.79	1288.12	515.476
IVGNm05581	AK166266,BC094464,NM_001038643	mRNA	2749.78	2680.44	2044.15	1488.78	986.59	540.991	279.55
IVGNm26479	AF159368,AK005594,AK075926,AK077308,AK137198,AK149182,AK168857,AK169689,BC019650,BC086778,NM_019745	mRNA	2747.01	2373.2	1945.38	1297.02	548.147	324.062	237.055
IVGNm23372	AF164513,AF175324,AK011536,AK146338,AK159188,AK176936,AK189031,BC033276,BC049880,NM_019752	mRNA	2746.91	3044.23	2655.03	2292.64	1698.37	1243.79	1181.95
IVGNm01962	AK089220,BC057589,NM_007523,Y13231	mRNA	2743.26	3094.86	2258.27	1949.16	1301.67	843.165	507.971
IVGNm27602	AK004455	ncRNA	2741.43	2663.5	2692.2	2704.37	2091.76	1339.55	646.011
IVGNm14026	AK077664,AK087924,AK131976,AK133890,BC012966,NM_021876,U78103,U97675	mRNA	2728.67	2666.66	1683.93	842.971	446.502	366.803	343.663
IVGNm22791	AK011728,AK031680,AK075950,AK153185,BC086683,BC098472,BC116238,BC116239,NM_026282	mRNA	2727.86	3122.77	2574.84	2219.2	1378.45	735.689	389.096
IVGNm19339	AF145716,AK021361,AK083464,AK146930,AK168005,BC060529,BC094348,EU163407,EU163408,EU163409,NM_001113419,NM_001113420,NM_001113421,NM_013928,NR_036665	mRNA	2726.59	2557.1	2128.78	1658.6	804.85	363.885	229.433
IVGNm12983	AK008536,AK019222,AK156371,BC034165,BC039774,BC052930,NM_007953,U85259	mRNA	2725.8	3118.78	1862.4	1327.84	692.171	467.806	400.493
IVGNm04953	AK146723,AK151589,BC048355,BC082791,NM_207161	mRNA	2724.94	2920.68	2743.1	2597.01	2247.91	1601.93	738.635
IVGNm20115	AK004805,AK005263,AK081598,AK159237,AK168500,AK220236,BC011466,BC098227,NM_026267	mRNA	2724.79	2749.13	2297.9	2322.99	1943.82	1836.85	1245.71
IVGNm06038	AK005294,AK033190,AK033283,AK051260,AY040823,BC018376,BC057877,BC061461,CT010189,NM_001159714,NM_027328	mRNA	2724.19	2685.22	2656	2035.81	1193.25	563.716	301.175
IVGNm30000	AK089603	ncRNA	2723.45	2544.77	2028.11	1889.1	1456.85	1256.97	1428.48
IVGNm00831	AK005825,AK018786,AK020098,AK048527,AK050256,AK153513,AK166967,AY043239,BC013627,BC023382,BC037062,NM_026602	mRNA	2722.92	3023.63	2574.46	2269.06	1468.83	964.452	480.748
IVGNm20624	AK034650,AK165950,BC058663,NM_001033600,NM_019477,NM_207625	mRNA	2722.12	2397.75	2543.1	2109.01	1502.29	1252.79	702.544
IVGNm24926	AK014336,AK029150,AK034817,AK129040,AK147118,AK150332,AK151031,AK152941,AK166753,AK182782,BC023295,BC050104,NM_001039351,NM_001039352,NM_001039353,NM_053086	mRNA	2721.97	3483.67	2422.73	1542.95	580.742	280.343	166.971
IVGNm05841	AK013944,AK145977,AK146378,AK151750,AK152689,BC003233,BC023244,BC050882,BC082274,NM_016849,U75839,U75840	mRNA	2720.58	2843.78	1914.5	1152.83	889.636	924.065	1119.58
IVGNm19011	AK003660,AK090384,AK143475,BC011417,NM_146141	mRNA	2720.48	2679.44	2279.05	2129.98	1455.19	849.194	308.351
IVGNm31195	AB221648,AF314031,AK003438,AK054037,AK081695,AK139343,AK161446,AK179716,BC037437,BC066113,BC079615,NM_023472	mRNA	2717.55	2791.25	2603.5	2183.67	1545.12	1189.55	886.49
IVGNm33040	AK144504,BC026554,M64278,NM_007693	mRNA	2716.97	2914.1	2909.79	3013.61	2918.15	2847.36	2748.29
IVGNm33308	AF078840,AK007418,BC024368,NM_015807	mRNA	2715.02	3162.99	2205.22	1543.31	688.197	325.134	332.599
IVGNm17231	AF353730,AK154489,AK154845,AK170962,AK171626,BC011093,NM_053261	mRNA	2706.25	3009.7	2775.09	2628.54	1889.28	1335.51	769.262
IVGNm22341	AK144566,AK189871,AK189925,AK191025,AK191105,AK192779,AK196740,AK201505,AK203454,AK204332,AK219941,BC024114,BC025837,BC031759,NM_145587	mRNA	2706.02	2603.9	2272.28	1975.6	1467.79	895.57	620.687
IVGNm16747	AB008516,AK148494,AK161168,AK164106,AK164492,BC145489,BC167169,NM_009441	mRNA	2700.7	3638.55	2787.4	2585.88	1997.74	1408.84	1155
IVGNm06026	AK005267,BC012230,NM_026885	mRNA	2697.48	2493.06	2610.72	2062.45	1323.46	563.063	402.677
IVGNm20689	AK043098,AK075928,AK078061,BC020100,BC023194,BC083125,NM_153059	mRNA	2690.3	2557.95	1782.22	1074.75	494.869	291.186	164.992
IVGNm00088	AK005111,AK010915,AK016715,AK050648,AK171961,BC024696,BC025081,NM_029748	mRNA	2688.28	2825.5	2468.79	2442.02	1964.73	1546.95	1236.43
IVGNm13514	AK080083,AK080847,AK088539,AK153523,AK161848,BC083072	mRNA	2687.8	2061.33	2239.86	1981.25	1545.01	1396.05	733.495
IVGNm06913	AB049958,AK003130,AK010282,AK011558,NM_026401	mRNA	2687.64	3151.86	2293.3	1863.42	1349.82	670.189	523.681
IVGNm33340	AF077302,AK028851,AK031501,AK032176,AK050329,AK077392,AK083800,AK151531,AK215649,BC005770,NM_019584	mRNA	2685.88	2919.67	3157.82	3208.64	2869.18	2832.8	2323.11
IVGNm33704	AK151964,AK152925,AK153382,AK159185,AK166037,AK171000,BC010583,BC027169,NM_146035	mRNA	2685.38	2143.04	922.337	368.915	211.578	236.342	267.142
IVGNm33417	AK009218,AK012384,AK143423,AX775977,AX775979,BC152942,NM_025507	mRNA	2684.63	2509.54	2327.23	1553.52	938.512	380.708	239.581
IVGNm26282	AF012822,BC007163,BC013628,NM_016856	mRNA	2679.7	3334.43	2444.35	1976.29	1109.3	540.046	291.363
IVGNm23900	AK089980,AK164994,AK171708,BC023018,BC057448,BC058764,NM_198102	mRNA	2677.98	3125.48	2172.98	1876.87	1243.31	780.936	653.886
IVGNm30257	AJ627039,AK003806,AK009697,AK014469,AY183136,AY183137,BC027219,NM_001177965,NM_019870	mRNA	2673.73	2859.58	2704.11	2438.81	1549.49	620.491	348.881
IVGNm24022	AK044194,AK080814,AK144438,AK155061,AK212980,AK213912,AK217786,AK218042,AK218056,AK218648,BC018596,BC039649,D10715,NM_007879	mRNA	2670.66	2687.47	2689.33	2338.56	1525.49	679.177	289.645
IVGNm28885	AK042393,AK145126,AK165891,AK167047,AK209135,BC026795,NM_027009	mRNA	2667.97	2733.44	1759.77	1034.47	390.802	145.129	114.906
IVGNm17137	AK010539,AK017655,AK160293,BC019194,BC034135,BC055875,NM_025881,NM_028190,NR_037905,NR_037906	mRNA	2666.94	3958.79	2341.5	1727.65	1435.86	1063.46	1015.74
IVGNm34255	AF287135,AK007910,AK078059,AK137849,BC038861,NM_023243	mRNA	2655.83	2818.92	2030	1601.94	956.945	816.901	654.6
IVGNm30830	AF262055,AK077167,AK146832,BC052155,NM_020002	mRNA	2655.83	2700.5	2123.79	1561	872.809	618.448	601.804
IVGNm27786	AK018249,AK019071,AK208437,BC029636,BC045194,BC057857,BC061493,NM_010145	mRNA	2648	2584.72	2280.61	2045.43	1757.8	1370.69	831.774
IVGNm06829	AJ238894,BC108959,BC108960,NM_022816	mRNA	2647.45	2349.81	2247.38	1754.95	943.808	405.285	162.783
IVGNm14085	AK134068,BC057146,BC071268,D49920,NM_007997	mRNA	2646.73	3048.83	2080.11	1634.98	1131.37	735.702	583.532
IVGNm05965	AK008882,AK010573,BC029192,BC051120,NM_025556	mRNA	2646.45	2824.88	2240.78	1794.25	1246.95	503.457	257.732
IVGNm05868	AF131196,AK009572,BC002109,NM_019738	mRNA	2642.83	2870.48	2516.37	2528.75	2360.57	2212.43	1557.17
IVGNm29375	AK011346,AK011699,AK017768,AK133835,AK161847,BC002064,BC048363,BC061695,D90225,NM_008973	mRNA	2641.47	2914.18	3141.35	2986.88	2918.31	3306.94	3534.26
IVGNm32221	AB007912,AF069708,AK002957,AK003203,AK003409,AK032737,BC057017,NM_009133	mRNA	2641.21	2348.19	2503.39	2572.74	2304.35	2467.18	1820.9
IVGNm05851	AF015811,AF406611,AK045235,AK077561,AK083589,AK161270,AK162033,AK167876,AK169257,AY489184,BC031767,BC057860,NM_018743	mRNA	2635.73	2758.15	1853.45	998.722	494.482	376.973	333.505
IVGNm18468	AK005227,AK005234,AK009719,AK147076,AK154989,AK155976,AK156737,AK167355,AY061882,BC023205,BC086645,NM_133242	mRNA	2634.79	4117.6	2024.35	1423.35	878.888	598.053	549.051
IVGNm25142	AJ276895,AK009709,AK012585,AK077751,AK153377,AK168153,AK184206,BC004574,BC053404,NM_021525	mRNA	2633.94	2942.79	2179.95	1375.96	763.841	463.527	371.855
IVGNm34575	AK004341,AK016797,AK089003,AK146039,AK152695,BC068254,NM_029406	mRNA	2629.87	2911.05	2905.6	2632.5	1649.74	692.503	526.792
IVGNm30248	AK003270,AK010925,AK011268,AK150549,AK151075,AK151209,AK151457,AK166547,AK205215,BC021331,BC040813,BC043022,BC054057,BC065795,DQ144541,NM_025289	mRNA	2628.24	3140.99	2674.97	2055.57	1051.71	381.246	170.727
IVGNm27256	AK009724,BC070414	ncRNA	2628.1	2981.14	1944.55	1491.16	957.841	760.996	654.982
IVGNm07493	AK004745,AK029912,AK150269,AK152106,AY039004,BC138545,NM_028774	mRNA	2623.22	3224.26	2468.92	2325.91	1954.85	1457.05	1372.92
IVGNm26397	AF203969,AK010566,AK045238,AK149953,AK157205,AK158036,AK170842,AK171838,BC006748,BC023297,NM_018813	mRNA	2621.82	3183.44	2595.07	2337.85	1597.72	815.227	511.63
IVGNm31418	AK053163	ncRNA	2618.94	2507.78	2293.09	1908.2	1443.78	997.587	568.633
IVGNm31045	AK005176,AK007440,AK010958,AK147003,BC027113,BC042209,BC054419,BC116919,BC116945,NM_025435	mRNA	2618.68	2206.09	2061.79	1757.84	1317.55	968.74	652.739
IVGNm04491	AK002600,AK002881,AK009191,AK011122,AK146135,AK181079,BC021536,NR_027897	mRNA	2618.36	2889.27	2097.46	1650.28	972.659	541.08	497.886
IVGNm04840	AK004787,BC037482	mRNA,ncRNA	2617.76	2891.55	1904.32	1507.88	747.249	429.171	265.647
IVGNm26273	AF175407,AK036750,AK195714,AK206053,BC019879,BC021389,NM_016717	mRNA	2617.74	2646.22	2330.19	2021.94	1587.52	1105.51	654.134
IVGNm20526	AK005341,AK019078,AK160321	mRNA	2614.77	5458.23	2393.54	2153.45	1925.15	638.239	400.216
IVGNm27790	AK019334,AK019335,AK019348,AK050598,AK083371,AK169832,NR_027901	ncRNA	2613.08	4745.66	2562.73	3041.57	4102.56	3690.73	6897.08
IVGNm11558	AK003134,AK003985,AK028344,AK036059,AK054257,AK172066,AK189281,BC006594,NM_025396	mRNA	2612.22	3074.37	2815.97	3033.04	2616.54	1340.16	613.534
IVGNm32911	AK042919,AK046033,AK046468,AK050554,AK077695,AK082803,AK086448,AK086632,AK145399,AK166018,AK182882,AK215316,BC025803,NM_178653	mRNA	2609.71	2297.67	2472.17	2075.23	1277.36	720.336	325.458
IVGNm06983	AK082704,AK135728,AK136894,AK145318,AK151283,AK163370,AK163390,AK169406,AY382529,BC016083,BC067075,BC076635,BC094888,BC096442,NM_001122963,NM_028487	mRNA	2609.45	2310.5	1253.39	684.716	431.067	360.537	275.71
IVGNm26359	AF133818,AK146275,AK146854,AK150291,AK152536,AK160862,AK166534,AK167756,AK167766,AK167862,AK167983,AK168033,AK168162,AK168613,AK169114,AK169335,BC049115,BC051187,BC132547,BC138575,NM_017381	mRNA	2605.46	2877	2217.86	1553.17	954.775	758.639	675.551
IVGNm06734	AF167573,AK076346,AK132414,AK165165,BC023905,NM_013768	mRNA	2603.4	3023.85	2607.96	2272.77	1515.29	657.212	326.876
IVGNm23517	AK005211,AK150218,AK193505,BC019498,BC057658,BC061033,NM_026883	mRNA	2603.37	2451.62	2107.65	1383.87	735.258	319.221	219.085
IVGNm32955	AK131626,AK169837,AK213019,BC048517,NM_207207	mRNA	2600.63	2982.55	2240.07	1517.59	674.938	359.274	293.346
IVGNm26463	AK088076,AK152693,AK160078,AK168160,AK168174,AK190193,AK198109,AK209792,BC024855,BC025032,NM_146200,U67328	mRNA	2598.26	2801.95	3317.11	3098.44	2344.27	1210.45	488.822
IVGNm19376	AK003228,AK148295,AY424291,BC024094,BC030936,NM_197985	mRNA	2591.95	2535.23	2078.03	1637.55	937.22	499.84	306.768
IVGNm23708	AB035383,AK133934,BC063748,NM_144509	mRNA	2591.35	3136.92	2694.35	1985.78	996.102	511.746	478.257
IVGNm10023	AF005051,AK038646,AK052001,AK160084,AK166276,AK182346,BC092232,NM_001110831,NM_016878	mRNA	2590.42	3111.97	2796.41	2438.27	1693.89	841.699	403.314
IVGNm23105	AK187638,BC009004,NM_008014,U42383	mRNA	2587.29	2574.15	2593.71	1933.66	1102.07	441.156	250.43
IVGNm25775	AK003659,AK149212,BC026538,NM_025285	mRNA	2581.14	2511.86	2573.94	2549.98	2399.95	2360.06	1736.41
IVGNm10734	AK131844,AK131915,AK141221,BC003266,NM_030252	mRNA	2578.57	2704.29	991.427	448.789	273.67	228.206	244.363
IVGNm05397	AK002893,AK006170,AK010709,AK011424,AK016756,AK028525,AK153857,AK167045,BC022947,BC083077,NM_172054	mRNA	2576.02	2128.93	1673.7	703.115	273.089	165.233	180.974
IVGNm03874	AK013108,AK019378,BC024947,NM_029798	mRNA	2574.2	3054.09	2590.93	2433.99	2045.14	1445.47	796.608
IVGNm21945	AK162044	mRNA	2573.48	2649.4	1090.64	562.035	381.434	385.329	448.779
IVGNm22323	AK004589,AK030199,AK149530,AK170557,AK194796,BC070423,NM_001040403,NM_008028,U07890	mRNA	2570.53	2330.91	1982.85	1876.41	1689.23	1562.4	1305.59
IVGNm25108	AK004137,AK160536,AK169253,BC034329,BC062146,NM_019428,U95123	mRNA	2569.17	2294.75	1766.56	1238.94	504.398	227.115	143.633
IVGNm07349	AB019523,AK144402,AK146264,BC002103,BC004038,BC012930,NM_024256	mRNA	2564.94	2929.97	2224.59	1901.34	1848.41	1763.94	1942.49
IVGNm13791	AK031451,AK050829,AK088081,AK141893,AK172872,BC016186,BC041111,BC052686,BC145533,NM_177474	mRNA	2564.11	2770.17	2575.55	2213.18	1498.4	796.376	423.137
IVGNm34196	AK003139,AK007474,BC030079,NM_001145433	mRNA	2562.84	2510.5	1718.98	1265.58	800.414	496.088	389.108
IVGNm14689	AK144618,AK149745,AK151496,AK152089,AK152874,AK153569,AK165659,AK167760,AK168187,AK168720,AK182214,AK183653,AK186336,AK187601,AK207617,BC056171,NM_008850,S72681,U96725	mRNA	2560.75	2677.61	2642.38	2569.98	2022.85	1305.6	673.672
IVGNm14214	AK088721,AK132459,AK133799,AK167807,AK169611,BC003285,BC033439,M73329,NM_007952	mRNA	2559.24	2168.26	2750.4	2515.99	2014.61	2454.32	1853.7
IVGNm15315	AK009324,AK146707,AY112699,AY945937,BC030044,BC051487,BC060966,BC082275,NM_027315	mRNA	2557.56	2733.64	2428.81	2311.23	1858.58	1482.54	956.52
IVGNm05776	AF017152,AK135226,AK137496,AK144966,AK162943,BC070455,NM_011369	mRNA	2549.04	2312.61	2083.84	1293.46	602.934	269.441	206.546
IVGNm05314	AF236636,AK051894,AK053745,AK077517,AK082837,AK155939,AK168318,AK218866,BC023789,NM_030724	mRNA	2547.99	2957.68	2355.95	1750.48	774.062	291.768	212.038
IVGNm30233	AK007731,AK150287,AK171619,AK172641,AK182577,AK185600,BC003445,NM_024233	mRNA	2547.62	2585.75	2500.06	2343.59	2104.64	1537.9	1011.27
IVGNm06023	AK003649,AK082137,AK089885,AK152709,AK152889,AK155378,AK170093,AK206671,AK213021,AY161042,BC031987,BC062903,NM_026792	mRNA	2546.05	2395.28	2079.1	1630.16	954.905	486.743	237.192
IVGNm32223	AK003049,AK005331,AK011938,AK017481,AK019337,AK031856,AK161556,AK161579,BC029021,NM_009162,X15830	mRNA	2544.2	2635.31	2453.57	2382.23	2299.78	2645.73	3322.13
IVGNm24356	AK007401,BC024354,M83741,NM_025273	mRNA	2544.12	2611.75	2194.7	2448.94	2278.13	2462.32	2343.8
IVGNm20369	AK011423,AK049162,AK083597,AK159562,AK165180,AK165917,AK169485,AK170791,AK195019,AK200110,AK218595,BC019513,BC043919,BC055328,BC059047,NM_029364	mRNA	2543.99	2610.81	2343.62	2643.5	2259.33	2392.76	1934.64
IVGNm27803	AK019955,BC056458	mRNA	2543.38	2351.22	957.723	446.244	303.868	300.156	275.859
IVGNm12786	AB033168,AK165843,BC055465,NM_178363	mRNA	2542.23	2613.72	1788.73	1122.51	537.126	372.978	296.465
IVGNm24238	AF071209,AK002473,AK008704,AK088387,BC023324,DQ157177,NM_001131054,NM_013917	mRNA	2541.7	2794.47	2313.02	2149.4	1431.68	768.602	443.073
IVGNm21798	AK140215	ncRNA	2539.75	2149.05	1821.87	1241.06	966.561	500.609	763.207
IVGNm24364	AK002539,AK004210,AK134624,BC027305,NM_025410	mRNA	2534.76	2519.34	2286.06	2051.9	1618.02	1178.81	986.148
IVGNm13723	AF363970,AK052094,AK080423,AK146033,AK149676,AK158597,AK166715,AK169024,AK177605,AK195402,AK197404,AK200371,BC021534,BC065174,NM_133216	mRNA	2531.78	3001.69	2652.09	2720.08	2153.15	1348.82	649.752
IVGNm26115	AF044222,AF044223,AK134598,AK145952,BC024507,BC025595,BC043729,NM_011908	mRNA	2531.36	3061.34	2228.98	1746.62	995.446	612.169	504.854
IVGNm24089	AK013901,BC003342,NM_008894,Z72486	mRNA	2528.64	2836.27	2738.91	2378.91	1131.97	382.395	179.498
IVGNm30284	AK004174,AK009802,AK172194,AK188693,BC033438,BC049222,BC055798,NM_025417	mRNA	2527.38	2914.48	2486.57	2419.3	1875.78	1153.64	827.432
IVGNm16083	AK005646,AK019594,AK077005,AK077718,AK134906,AK150818,AK151951,AK165322,AK186459,BC003428,NM_024184	mRNA	2526.18	2492.79	2228.46	1562.87	706.289	324.107	188.48
IVGNm29547	AK014249,AK019088,BC063256	mRNA	2524.34	2767.45	2056.46	1813.32	1129.21	547.523	346.815
IVGNm03499	AK077709,AK147175,AK169171,BC052438,BC052711,BC055115,D45836,D67015,NM_008379	mRNA	2521.57	2764.84	2731.35	2346.41	1352.53	561.724	271.443
IVGNm05226	AF117831,AK003007,AK005408,AK019158,BC011427,BC026953,BC027439,NM_023343	mRNA	2521.21	2279.67	2437.21	1843.26	1026.42	528.427	308.068
IVGNm32801	AK007318,AK041634,AK145955,AK145999,BC038077,BC048815,NM_147778	mRNA	2520.29	2237.07	2232.47	1551.63	841.523	321.588	191.208
IVGNm32327	AK011242,AK076468,AK151157,AK151177,AK160282,BC027384,D13473,D13803,NM_011234	mRNA	2511.52	2783.73	2246.38	1593.15	789.132	309.92	173.186
IVGNm15215	AB049947,AK003126,AK005131,AK008623,AK010330,AK050396,AK140877,BC029193,BC055861,NM_025544	mRNA	2510.04	2822.92	2467.25	2396.68	1671.72	773.326	378.414
IVGNm34518	AF038507,AK002502,AK008437,AK077356,BC042200,BC061056,BC072610,NR_027924,NR_027925	mRNA	2509.47	2713.35	2094.65	1916.94	1310.28	721.959	550.159
IVGNm06848	AK010220,AK013177,AK133699,AY037837,AY167988,BC002176,EF410127,NM_024186,NM_024272	mRNA	2509.32	2359.46	2169.66	1620.88	912.172	485.061	273.67
IVGNm30181	AK016711,AK088292,AK146423,AK156370,AK162204,AK168449,BC002041,BC026786,BC034438,BC053417,NM_001104616,NM_001104617,NM_009041,X60672	mRNA	2502.45	3313.5	2834.75	2490.1	1899.28	991.196	413.707
IVGNm32403	AF152841,AF152842,AK010253,AK011636,AK076096,BC005622,BC052156,BC158075,NM_019393	mRNA	2500.79	2506.76	2029.29	1433	543.687	184.781	129.997
IVGNm02294	AK150688,AK161327,NM_007711,NM_173873,NM_173874,NM_173876	mRNA	2500.07	2036.06	1247.8	707.828	381.127	267.426	213.393
IVGNm21949	AK162836,NM_001163145	mRNA	2498.71	2344.5	1131.95	754.465	556.235	465.878	323.678
IVGNm25069	AK004839,AK008765,AK169338,BC031809,BC093529,NM_001159487,NM_011255,U63146	mRNA	2495.09	2745.22	2414.97	2306.79	2224.63	2038.36	1924.59
IVGNm05038	AK004504,AK015068,AK037709,AK178225,BC011457,BC019761,BC020098,NM_001039483	mRNA	2492.72	2383.67	2324.98	2078.52	1657.45	1252.02	692.419
IVGNm01956	AK146499,AK151200,AK151322,AK151586,AK152718,AK152766,AK153341,AK159133,AK159153,AK159586,AK159701,AK159986,AK160080,AK160854,AK166669,AK168852,AK169155,AK169270,AK170110,BC012497,BC046302,BC085300,NM_007509	mRNA	2490.83	2582.2	2586.94	2273.82	1639.16	661.796	286.76
IVGNm25170	AK003210,AK012674,AK014691,AK151972,AK168416,BC026750,NM_025576	mRNA	2490.53	2616.47	2210.13	2113.05	1631.93	1202.54	767.605
IVGNm29344	AK033722,AK089978,AK167618,AK170938,AK202262,BC007175,BC023767,BC031704,BC051065,NM_133916	mRNA	2488.89	2604.82	3208.43	3225.34	1852.34	526.417	221.362
IVGNm00773	AB041655,AK002653,AK007387,AK032680,AK050508,AK075776,AK144732,AK148485,AK149786,AK150005,AK150025,AK150368,AK150428,AK150659,AK150714,AK150770,AK150809,AK151323,AK151384,AK151456,AK151669,AK151853,AK152373,AK152383,AK152583,AK152636,AK152806,AK152882,AK152996,AK153056,AK153118,AK153138,AK153286,AK153415,AK153456,AK159271,AK161595,AK166004,AK166052,AK167482,AK167952,AK168046,AK168569,AK168734,AK1…	mRNA	2485.95	2886.58	2180.76	2114.91	1415.79	614.692	254.248
IVGNm11591	AK017217,AK032167,AK078881,BC014761,NM_001164838,NM_027742	mRNA	2481.59	2922.04	2356.91	1766.78	850.182	432.807	320.471
IVGNm15278	AK005825,AK018786,AK020098,AK048527,AK050256,AK153513,AK166967,AY043239,BC013627,BC023382,BC037062,NM_026602	mRNA	2479.6	2625.63	2328.65	1947.14	1386.21	819.981	427.879
IVGNm03658	AF176007,AF192558,AK009623,AK154010,AK178745,AK178762,AK183124,AK188675,AK195241,AK199429,AK200271,AK201694,AK207873,AK208166,AK214576,BC023135,BC026436,BC027274,NM_019880	mRNA	2478.71	2820.8	3356.24	3426.37	3739.43	2509.56	1059.75
IVGNm15945	AB088408,AK083372,AK133921,AK171515,BC011075,NM_013477,U13840,U21549	mRNA	2475.94	2542.14	2545.49	2723.12	2582.68	1843.12	940.554
IVGNm35853	BC115818,BC115921,NM_001024206	mRNA	2475.72	2424.47	2149.78	2190.5	1785.73	1154.31	638.049
IVGNm21279	AK007614,AK156587,NM_001164082	mRNA	2474.68	2363.97	1300.57	663.119	358.089	286.334	296.079
IVGNm24624	BC013529,NM_145418	mRNA	2474.36	1952.03	1560.39	1281.77	921.546	566.881	224.81
IVGNm02123	AF290209,BC052442,BC054530,NM_013723	mRNA	2473.75	2444.69	2017.72	1727.11	1213.57	678.797	334.016
IVGNm34712	AJ534940,BC061481,BC062939,NM_133786	mRNA	2472.45	2244.34	2160.91	1415.77	646.925	647.749	505.81
IVGNm23218	AB303567,BC002030,NM_010492,U26459,U26460,U34595	mRNA	2468.93	2568.54	2444.9	2033.97	1436.45	1054.94	693.803
IVGNm03163	AK075848,AK088582,AK147289,AK150009,AK169286,AK204256,AK220536,BC012042,BC013670,BC025040,BC029143,BC031165,BC049104,BC057354,BC061232,NM_010956	mRNA	2467.62	2820.11	2636.17	2487.77	1688.04	835.577	385.301
IVGNm01057	AK014034	ncRNA	2461.22	2235.45	925.124	515.42	262.451	198.688	185.568
IVGNm06282	AF212319,AK088110,AK145753,AK146564,AK161640,AK169395,BC060030,NM_173011,U51167	mRNA	2460.71	2597.76	2674.09	2894.79	2515.69	2309.14	1270.65
IVGNm34013	BC119146,BC120834,NM_146280	mRNA	2458.67	2721.65	2185.22	1816.07	1410.32	1546.28	1896.21
IVGNm11815	AK031756.1,AK043313,AK150763,BC009118,NM_145595	mRNA	2456.16	2215.17	1606.57	979.915	445.997	188.842	173.256
IVGNm09605	AK010077,AK078508,AK088839,BC023020,BC024861,BC027134,NM_146107	mRNA	2455.2	2770.11	2304.49	2150.67	1826.71	1531.95	1006.31
IVGNm23492	AK004795,AK009881,AK154539,AK165702,AK168112,BC017125,NM_026129	mRNA	2454.79	2619.18	2329.55	1923.13	1606.66	903.059	477.083
IVGNm01516	AK030662,AK046533,AK136296,BC117761,BC127156,NM_178395	mRNA	2450.92	2334.93	2338.27	2194	2109.38	1999.13	1814.26
IVGNm02819	AK011671,AK144613,BC024840	mRNA	2447.15	2219.18	2124.09	1568.48	957.832	558.076	361.218
IVGNm22209	AJ279848,AK011066,AK028117,AK150780,AK152491,AK160191,BC002080,NM_011072,X14425	mRNA	2446.72	2946.02	2837.04	2810.63	1862.68	616.706	389.084
IVGNm27140	AK013438,NM_181821	mRNA	2445.01	2787.89	2361.54	2476.71	2003.6	1689.99	1080.54
IVGNm10696	AK084716	ncRNA	2444.43	2241.81	2032.24	1933.92	1501.49	1546.38	1696.77
IVGNm11875	AK146136,AK168391,BC048480,BC096578,BC115549,BC115550,D78255,NM_018739	mRNA	2443.31	3062.52	1854.9	1185.08	719.591	441.805	365.876
IVGNm01559	AK140938,NR_037569	mRNA	2440.22	1831.83	1436.87	1197.15	878.717	762.702	826.043
IVGNm23465	AK004037,AK013196,AK131114,BC022953,NM_025578	mRNA	2437.89	2610.48	2241.03	2015.5	1494.34	719.989	270.466
IVGNm31551	AK011085,AK135332,AK188046,BC014799,BC021935,NM_025509	mRNA	2435.63	2579.76	2134.47	1907.8	1462.07	1121.81	675.664
IVGNm16182	AK010292,AK146518,BC038158,NM_027187	mRNA	2434.96	2636.77	2238.31	1766.77	830.724	318.549	186.234
IVGNm22344	AK004835,AK154336,AK157387,AK190777,AK205273,BC002150,NM_133772	mRNA	2434.08	2664.42	2489.19	2333.57	1863.43	1618.48	1433.51
IVGNm06715	AB071988,AF171080,AK177545,AK177665,AK180236,AK185330,AK186090,AK188813,AK192900,AK193982,AK199563,NM_001159513,NM_012015	mRNA	2433.64	2666.9	2642.16	2795.14	2504.52	2172.45	1155.11
IVGNm17078	AK010861,AK050500,AK075785,AK075953,AK148511,AK166730,AK181134,AY054981,BC003999,BC018282,BC040747,NM_001190804,NM_001190805,NM_026400	mRNA	2432.23	2472.03	2755.9	2580.08	2052.97	1929.21	1101.19
IVGNm15173	AF168682,AK002552,AK003940,AK038596,AK052667,AK139374,AK151859,AK152369,AK159751,AK167346,BC013547,NM_023229	mRNA	2431.86	2726.74	2398.21	2336.34	1790.36	1234.09	1043.29
IVGNm15500	AK191655,BC002199,BC038145,NM_145964	mRNA	2431.63	2329.44	2287.41	2093.26	1800.55	1678.36	1406.02
IVGNm25620	AK031451,AK050829,AK088081,AK141893,AK172872,BC016186,BC041111,BC052686,BC145533,NM_177474	mRNA	2430.46	2602.32	2454.72	2062.81	1495.51	736.279	398.026
IVGNm30193	AK011876,AK028483,AK030736,AK038919,AK149844,AK164578,BC021313,BC048179,NM_001166457,NM_001166459,NM_145956,S68022	mRNA	2428.87	2693.09	1881.1	1322.61	674.493	425.132	320.508
IVGNm00294	AK004586,AK032688,AK075859,AK135235,AK136108,AK152444,AK159554,AK166645,AK191801,BC024891,NM_025813	mRNA	2428.38	2281.76	2396.98	2364.31	1929.48	1618.73	758.203
IVGNm34084	BC148561,BC156748,NM_175655	mRNA	2427.81	2759.05	897.78	862.242	759.16	845.291	985.383
IVGNm02906	AK017918,NM_153139	mRNA	2426.76	2090.03	1521.72	1127.15	775.673	680.755	521.138
IVGNm16019	AB009021,AB072450,AF133427,AF242591,AK006798,AK053325,AK089494,AK141951,AK146130,AK152175,AK154919,AK159324,AK159418,AK159621,AK159914,AK168231,AK169068,AK178223,AK180027,AK182665,AK183645,AK184417,AK185811,AK187762,AK188385,AK207599,AK210479,AK220124,BC043072,NM_019793	mRNA	2424.2	2453.79	2561.47	2599.89	2455.65	2555.18	1944.2
IVGNm05869	AB025407,AK003415,AK144059,AK167571,AK168206,AK169309,BC072575,NM_019772	mRNA	2420.48	2935.02	2099.44	1705.68	1042.27	520.055	291.434
IVGNm06611	AF022811,AK002293,AK011200,AK152432,AK154479,AK168154,AK181381,BC034868,NM_009919	mRNA	2420.45	2043.01	1814.09	1864.98	1610.27	1672.4	1475.54
IVGNm24289	AK146678,AK166140,AK168671,AK169281,AK173091,BC010251,NM_001042593,NM_019702	mRNA	2419.71	2459.84	2749.72	2607.38	2006.85	1687.58	1120.73
IVGNm23227	AF039840,AK137657,AY533679,AY533681,AY533682,BC019184,NM_010765	mRNA	2419.48	2790.39	2114.19	1559.82	800.42	501.014	399.48
IVGNm21276	AF325535,AK004575,AK004910,AK007457,AK011535,AK031250,AK167511,BC003920,BC027240,NM_001135112,NM_023646	mRNA	2418.98	2468.65	2020.09	1694.92	956.726	497.148	298.614
IVGNm16216	AK012610,BC026668,NM_028312	mRNA	2418.72	2794.57	2390.24	1973.99	1172.74	564.414	287.781
IVGNm35279	AK090008,AK146704,AK150793,AK152328,AK152576,AK153160,BC048077,NM_177682	mRNA	2417.58	2570.59	2446.1	2176.21	1661.25	1141.65	575.262
IVGNm25998	AK154008,AK182858,AK194681,AK197801,AK197844,AK198841,BC066993,NM_013700	mRNA	2416.86	2706.16	2704.18	2386.41	1707.47	870.328	452.487
IVGNm22213	AF340231,AF453879,AJ310547,AK075582,AK152056,AK152223,AK159206,AK167477,AK179611,AK181244,AK186344,BC023299,BC051436,BC086764,NM_053208	mRNA	2415.07	2712.4	1981.11	1160.27	549.784	340.413	288.091
IVGNm22298	AK019135,AK027950,AK029376,AK031159,AK170022,AK186632,AY099327,BC033533,NM_030064	mRNA	2414.22	2132.52	656.259	326.01	291.996	289.319	315.475
IVGNm16867	AK076509,AK088669,AK132969,AK165898,BC094422,NM_001123037,NM_001123038,NM_013506,X12507	mRNA	2412.3	1835.92	1888.44	1530.57	1166.84	925.501	770.069
IVGNm16773	AK002903,AK010730,AK012369,AK146186,AK161330,BC003775,NM_009975,X52959,X56502	mRNA	2407.61	2271.92	2227.13	1924.5	1197.16	547.781	272.941
IVGNm22907	AK152122,BC080289,NM_001003950,S79539	mRNA	2406.6	2697.48	1963.29	1502.43	798.515	445.656	294.226
IVGNm06836	AF182040,AK002347,AK003920,AK186528,AK218437,BC010802,BC019157,BC037667,NM_023168	mRNA	2406.08	2701.97	2552.06	2574.67	2327.71	1544.06	981.816
IVGNm23778	AK019906,AK075865,AK082777,AK087002,BC037690,NM_172398	mRNA	2404.46	2678.45	2276.34	2191.14	1845.4	1248.78	552.676
IVGNm15106	AF104261,AK144606,AK148141,BC066014,NM_018878	mRNA	2402.76	2529.88	1928.98	1487.4	1003.88	802.472	630.91
IVGNm22029	AK010241,AK075694,AK145589,AK145762,AK146220,AK146417,AY029533,BC010670,BC043059,BC046797,NM_028015	mRNA	2401.73	2603.5	2547.4	2244.62	1586.89	1011.3	569.923
IVGNm06780	AK009492,AK085189,AK186185,BC012526,NM_019721	mRNA	2401.17	2552.87	1733.66	1075.74	539.917	483.033	527.096
IVGNm10176	AK003552,AK139182,AK151082,AK153482	mRNA	2400.59	2222.32	2108.83	1901.45	1503.81	1279.25	1010.82
IVGNm04476	AF363447,AK002639,AK159560,BC013819,NM_133771	mRNA	2396.9	2182.51	2139.73	1702.16	983.219	755.973	564.965
IVGNm26523	AK009147,AK049882,AK077253,AK147127,AK216003,BC002208,NM_020050	mRNA	2395.98	2817.03	2129.6	2125.64	1797.51	1351.52	871.02
IVGNm27678	AK009056,AK011888,AK011960,AK154783,BC027220,NM_170592	mRNA	2393.97	2391.48	1466.11	783.152	312.805	165.777	144.443
IVGNm29435	AK004519,AK146588,AK150388,AK150604,AK151095,AK151501,AK151871,AK161306,AK165995,BC034161,BC043055,NM_019989	mRNA	2390.42	2311.1	2415.67	2283.76	2121.89	2423.22	2028.12
IVGNm24691	AK003792,AK030039,AK042071,AK047545,AK053356,AK085666,AK128956,AK154181,AK154729,BC110697,BC117939,BC117940,NM_172551	mRNA	2389.74	2566.11	2002.97	1365.02	707.348	489.639	426.7
IVGNm29250	AK160318,BC112905	mRNA	2388.88	2473.39	1445.23	969.939	583.158	454.308	306.493
IVGNm29157	AK141536	ncRNA	2387.86	2272.31	1863.92	1859.41	1579.62	1367.36	938.934
IVGNm17350	AK145801,AK160985,BC027268,BC038620,BC085255,NM_172265	mRNA	2385	2815.06	2544.23	2531.37	1866.04	1043.19	420.813
IVGNm33267	AB093269,AK035435,AK154807,AK155630,AK158296,AK162530,AK165710,AK170849,AK171089,BC027417,BC039932,BC049803,BC063067,NM_012027,NM_201245,U73200	mRNA	2379.76	2556.05	2824.18	2755.75	2453.49	1889	1132.45
IVGNm31545	AK185769	mRNA	2378.83	2722.38	2106.83	1565.87	670.911	321.17	245.314
IVGNm23262	AK004829,BC037638,BC141081,M23568,NM_011626	mRNA	2373.95	2173.07	1685.55	1268.73	789.19	420.698	235.689
IVGNm35419	AK039027,AK085695,AK171672,AK172615,BC014688,BC059277,NM_145610	mRNA	2372.75	2385.29	1089.37	592.392	461.354	402.647	501.063
IVGNm04835	AK003448,BC021494,BC036151,BC036153,BC040459,NM_009643	mRNA	2371.96	2365.04	1565.14	957.184	366.579	155.153	74.7027
IVGNm02983	AJ532593,AK002643,AK028563,AK050893,AK051122,AK085776,AK139738,AK160619,AK166214,BC032929,NM_001083331,NM_172394	mRNA	2370.69	2556.85	2342.33	1736.76	812.868	449.108	333.666
IVGNm28642	AK015484,AK036594,AK133807	mRNA	2368.8	2426.17	1863.27	1805.29	1381.04	1215.81	1222.8
IVGNm02847	AK002381,AK007276,AK007934,AK010272,AK013834,AK019396,AK078417,AK084116,AK160922,AK161289,BC115661,BC115662,NM_026542	mRNA	2366.95	2556.38	2653.86	2807.52	2950.45	2357.77	1616.41
IVGNm00837	AK021256,AK075923,AK167001,BC021873,BC048685,NM_026578	mRNA	2366.19	2352.39	1974.26	1431.18	821.609	418.367	296.786
IVGNm11667	AK010262,AK050468,AK088192,AK090233,AK122215,AK152830,AK161899,BC017605,BC039052,NM_028018	mRNA	2366.04	2343.61	1741.82	884.707	397.813	265.826	232.104
IVGNm25257	AK010817,AK013055,AK017803,AK019142,AK159873,AK167458,AK170982,BC011318,BC029207,NM_025942,NM_030091	mRNA	2359.01	2701.62	2329.94	2098.82	1388.22	941.487	377.929
IVGNm22479	AK146584,AK186335,AK188162,AK206960,BC023066,BC052499,NM_198613	mRNA	2356.64	2474.93	2348.48	2392.99	2438.35	2001.72	1537.61
IVGNm06939	AK007708,AK135858,AY327413,AY974592,BC016521,NM_026967	mRNA	2356.58	2160.84	1089.2	714.559	614.116	626.695	773.525
IVGNm14306	AK053601,AK054211,AK133772,AK155305,AK166102,AK210383,AK220167,BC003770,BC003950,D85904,NM_008300	mRNA	2355.83	2562.77	2167.86	1498.35	568.239	245.384	179.766
IVGNm17011	AF169286,AK018144,AK148143,BC027289,BC131899,BC131901,NM_023587	mRNA	2353.47	2441.37	2044.08	1611.22	997.05	469.737	226.185
IVGNm24453	AK009957,BC104360,BC104361,NM_027168	mRNA	2353.26	2669.39	2219.62	2157.28	1540.35	741.363	267.877
IVGNm30253	AK133655,AK139140,AK148498,AK158315,AK164089,BC024785,NM_001164790,NM_009130,U02982	mRNA	2352.82	2452.75	2384.38	2346.22	2459.25	2450.56	2701.45
IVGNm01199	AK021370,AK153701,NM_001040131,NM_013507	mRNA	2345.79	2264.37	2210.13	2139.72	1792.01	2231.27	2443.89
IVGNm16207	AK010396,AK144945,AK163480,BC058568,NM_028038	mRNA	2344.52	2144.29	449.411	269.482	262.609	276.31	360.243
IVGNm24314	AK010659,AK088783,AK162286,AK169108,AK169718,BC018286,NM_021278,X16053	mRNA	2342.17	2299.65	1993.29	2087.97	1947.07	1879.26	1117.82
IVGNm22078	AK012297,AK161527.1,AK169268,BC020478,BC096558,EU604548,L19661,NM_001103165,NM_001103166,NM_001174073,NM_011042,X75947,X97982	mRNA	2336.89	2326.15	2108.14	2405.83	2015.58	2291.87	2109.56
IVGNm10135	AK008304,AK008587,AK140888,AK167814,AK209843,AK212297,BC013538,BC057963,BC063758,BC066042,NM_025920	mRNA	2328.02	2599.04	1809.39	1215.74	603.164	344.735	210.435
IVGNm19289	AK146446,AK146585,AK146607,AK146691,AK147005,AK158552,BC004848,BC024835,BC042502,NM_001136081,NM_182990,S50213	mRNA	2326.45	3319.28	2812.94	2770.28	2210.94	1442	859.767
IVGNm28243	AK008091,AK008714,AK093938,AK141315,AK150877,AK151931,AK152009,AK154435,NM_011794	mRNA	2324.83	2538.02	2177.21	1833.28	1418.79	1335.97	943.468
IVGNm29257	AK075731,AK083179,AK146697,AK160824,AK165046,AK172913,BC018378,D67016,L40406,NM_013559	mRNA	2324.59	2841.17	2841.66	2579.61	1516.18	708.752	281.153
IVGNm24452	AK009757,AK134541,AK138314,AK151301,BC024062,NM_027153	mRNA	2323.93	2134.1	2036.32	1760.01	1087.7	414.037	122.382
IVGNm20738	AB221663,AK051753,AK135572,BC138517,NM_008229,U31758	mRNA	2323.09	2182.99	2540.53	1992.19	868.752	358.792	147.845
IVGNm23480	AK004574,AK146076,AK186106,AK216257,BC014798,NM_025816	mRNA	2322.93	2510.71	2444.41	2089.65	1102.27	491.303	243.223
IVGNm16775	AK004838,AK029481,AK077386,AK185358,BC022712,BC054444,NM_010023,Z14049	mRNA	2321.85	2598.99	2119.31	1950.34	1515.13	872.724	325.539
IVGNm04462	AK032572,AK143616,AK144669,AK146813,AK146918,BC003741,D63850,FN687734,NM_008233	mRNA	2317.39	2936.41	2427.01	1914.52	1183.56	764.429	758.141
IVGNm23381	AB038243,AK003485,AK005437,AK171651,BC013618,BC054440,BC055036,NM_019824	mRNA	2316.45	1950.21	1990.03	1921.03	1522.19	1118.54	351.657
IVGNm34235	AF391799,AK008247,AK011845,AK012797,AK017234,AK143627,BC032292,BC057966,BC064891,NM_025652	mRNA	2311.52	2509.31	2251.92	1985.07	991.984	329.039	146.996
IVGNm33326	AF017176,AK076037,AK146334,BC026559,NM_017366,U41497,Z71189	mRNA	2310.27	2561.48	2443.93	2324.58	1934.6	1421.28	685.076
IVGNm17435	AK003547,AK003579,AK011281,AK012257,AK013225,AK019011,BC029238,NM_181392	mRNA	2309.34	2408.97	2205.12	2228.97	1838.79	1617.88	831.621
IVGNm26496	AF070970,AK003030,AK158848,BC049593,BC061114,NM_001047435,NM_001047436,NM_019695	mRNA	2303.12	2298.69	1054.74	517.696	293.167	201.656	232.843
IVGNm05790	AF230391,AF230392,AK141357,AK149995,BC020452,BC023335,BC058391,BC089337,NM_011588,U67303,X99644	mRNA	2302.84	2649.33	2497.86	2065.95	1212.3	628.054	439.769
IVGNm01423	AF034580,AK009230,AK083845,BC055941,NM_001168218,NM_001168219,NM_001168220,NM_023197	mRNA	2301.8	2501.5	1901.31	1218.05	519.289	255.898	198.864
IVGNm32167	AK088721,AK132459,AK133799,AK167807,AK169611,BC003285,BC033439,M73329,NM_007952	mRNA	2299.56	2534.65	2634.22	2482.62	2017.5	2268.21	1811.83
IVGNm20231	AF209436,AK044686,AK051633,AK084977,AY326397,BC059012,NM_001080780,NM_009050,X67812	mRNA	2295.94	2565.27	3078.19	2997.24	2580.78	2067.63	928.67
IVGNm02022	AJ308624,AJ308636,AK156410,BC048168,BC056997	mRNA	2295.73	2136.58	664.564	325.134	272.858	249.786	200.658
IVGNm27685	AK013116,AK129081,NM_027014	mRNA	2293.89	2246.18	1924.89	1272.7	573.794	223.325	155.968
IVGNm04811	AB079386,AK005266,AK011409,AK078877,AK150914,AK159231,AK209780,AK213960,AK220135,BC010809,BC030053,NM_026402	mRNA	2293.02	2095.41	1878.45	1335.58	713.288	342.191	180.116
IVGNm13763	AF220209,AK050560,BC020359,BC026372,NM_022996	mRNA	2290.54	2350.42	2390.47	2263.79	1567.61	1029.48	395.079
IVGNm16097	AK002730,AK003992,AK007726,AK009854,AK012803,AK051149,AK154036,BC028498,NM_025401	mRNA	2289.73	2621.11	2148.18	2273.02	2423.89	2071.13	1340.22
IVGNm04353	AK149652,AK166690,BC027835	ncRNA	2288.47	2327.22	2304.8	2005.71	1769.34	1588.06	1206.1
IVGNm14329	AK144322,BC046984,NM_010544	mRNA	2288.21	2217.78	1855.88	1694.43	1267.39	941.603	753.276
IVGNm30308	AK004437,AK011294,AK129057,BC039655,BC052656,BC094932,BC132363,BC145675,NM_001081188	mRNA	2287.77	2244.69	2002.59	1253.45	463.779	185.438	162.125
IVGNm19867	AK049398,AK077293,AK079274,AK083888,AK145755,AK146473,AK150750,AK152317,BC036269,BC054811,D78188,NM_008098	mRNA	2283.63	1874.21	1996.62	1923.72	1464.57	1661.95	1238.4
IVGNm01938	AK006366,AK156960,AK179120,BC003478,BC083112,D87903,NM_007481	mRNA	2283.45	2325.65	728.124	289.516	203.442	212.588	230.194
IVGNm00285	AK004351,AK031871,AK076611,AK122333,AK159746	mRNA	2281.84	2227.41	1950.52	1755.11	1227.8	1036.74	658.331
IVGNm25789	AK030091,AK075610,AK153930,BC039191,D50463,NM_009145	mRNA	2281.04	2368.9	2057.02	2224.4	1892.35	1964.45	1416.95
IVGNm32373	AF090430,AK045141,AK079175,AY136286,BC007128,NM_013771	mRNA	2280.03	1955.29	2034.48	1482.13	917.868	627.93	422.488
IVGNm29432	AK004319,AK028761,AK045274,AK051580,AK085696,AK088153,AK162451,AK167755,AK168360,AK168987,BC022911,NM_134255	mRNA	2279.38	2355.06	2214.66	1870.65	1366.44	906.519	509.085
IVGNm09048	AK172123,AK211523,BC027085,NM_001085498	mRNA	2278.82	2283.68	1974	1541.16	1047.45	652.907	362.581
IVGNm11788	AK031013,AK146128,AK159825,AK217500,BC013513,BC130014,M64641,NM_010817	mRNA	2278.28	2524.71	2059.97	1327.45	538.246	183.161	94.0906
IVGNm33351	AK020117,BC114579,BC140310,BC146469,NM_020034	mRNA	2277.28	1630.31	176.449	142.937	134.087	128.222	168.254
IVGNm33734	AK008677,AK010829,AK016638,AK017016,AK017810,AK153090,AK160682,BC082580,BC139162,BC139163,NM_172253	mRNA	2274.84	2821.92	1209.3	814.185	519.032	320.206	329.03
IVGNm05925	AJ251508,AK002775,AK009403,AK144902,BC010683,NM_022985	mRNA	2274.19	2447.76	2242.52	1893.84	1252.26	674.807	428.923
IVGNm16092	AK002698,AK004545,AK007544,AK180472,AK183462,AK215266,BC023338,NM_025360	mRNA	2273.79	2551.61	2440.69	2349.99	1985.09	1675.5	1122.23
IVGNm06482	AK002302,AK013892,AK081686,AK153011,AK168793,AK206427,AK208695,AK210624,BC115650,BC115651,D87901,NM_007479	mRNA	2273.75	2039.83	2316.56	1936.84	1451.93	843.639	387.754
IVGNm00863	AK039325,AK049513,AK140829,AK164951,AK169552,BC024524,BC049092,BC050192,BC057618,BC060149,NM_001159595,NM_178112	mRNA	2271.87	2339.57	1742.34	1038.21	395.645	234.765	182.663
IVGNm26638	AK051448,AK077568,AK082083,AK083155,AK087537,BC058119,BC063781,NM_178218	mRNA	2270.25	1678.41	832.092	714.988	622.538	479.214	363.133
IVGNm33389	AK003957,AK009487,AK009824,AK168951,BC003455,BC019631,NM_024211	mRNA	2270.21	2584.83	2297.92	2419.44	2173.94	1721.85	803.598
IVGNm04705	AK011286,AK206111,AK207281,AK215361,BC002134,BC021640,NM_013871	mRNA	2265.34	2332.36	2014.77	1684.03	1258.95	1102.71	1098.96
IVGNm26117	AK004800,AK011711,AK031247,AK053643,AK167019,AK168037,BC004028,BC052395,BC052823,BC054743,D38517,NM_011917	mRNA	2262.44	2278.99	2310.22	1922.43	1110.73	463.345	283.479
IVGNm22419	AK005584,AK078253,AK169641,AK171018,AY040775,BC016273,NM_027030	mRNA	2260.71	2335.29	2179.56	1820.31	1252.78	693.573	354.087
IVGNm33206	AK089215,AK151115,AK151608,AK161622,BC046754,NM_010907,U36277	mRNA	2260.4	1661.41	409.637	196.263	139.307	114.3	92.6978
IVGNm22248	AK003180,AK013754,AK045397,AK050274,AK075728,AK076151,AK088360,AK089964,AK122430,AK148082,AK150232,AK150918,AK150942,AK151143,AK151558,AK152178,AK152494,AK161627,AK167837,AK168167,AK177952,AK179328,AK186829,AK209741,BC016130,BC025071,BC046768,EU624323,NM_001037877,NM_001037878,NM_025804,U94988	mRNA	2260.25	2482.83	2956.32	3058.13	2478.38	1675.88	696.539
IVGNm16166	AK003863,AK049702,AK078209,AK085962,AK213061,BC027548,NM_026794	mRNA	2260.13	2612.05	1849.19	1473.1	1052.31	888.877	686.781
IVGNm10979	AK010425,AK090206,AK150436,AK152740,AK167607,AK172533,BC008240,BC011155,NM_028020	mRNA	2259.76	2208	2133.78	1736.71	1180.41	497.592	292.18
IVGNm09690	AK005523,AK020327,AK040602,AK155360,NM_001033135	mRNA	2254.87	2177.12	1942.26	1849.97	1231.81	1016.63	523.21
IVGNm13892	AF033566,AK013974,AY653308,BC002220,BC012675,CT010293,NM_007714	mRNA	2252.59	1847.2	979.984	740.506	638.553	662.728	754.458
IVGNm16783	AB212273,AF045462,AK158970,AK168525,AK220444,BC046809,BC138655,BC138656,NM_001025387,NM_001204973,NM_010238,NR_037970	mRNA	2251.59	2110.74	1673.26	1003.2	552.524	435.058	325.813
IVGNm02239	AK004994,AK009038,BC031436,NM_026183	mRNA	2251.41	2270.64	2105.57	1963.13	1537.46	1265.39	874.2
IVGNm34290	AK002675,AK030320,AK035607,AK044790,AK159288,NM_025799	mRNA	2251.12	2215.74	1957.92	1916.24	1510.07	1434.74	922.804
IVGNm07896	AK021126,AK030316,AK045412,NM_001081124	mRNA	2246.65	2365.56	2209.46	2119.27	1601.91	1156.59	637.354
IVGNm07447	AF414190,AK090329,AK144403,AK152362,AK154868,AK155551,AK167343,AK183228,AK189798,AK207266,AK211181,AK212100,AK218255,BC025875,BC036992,NM_028662	mRNA	2245.9	2612.48	1891.83	1392.84	788.787	496.193	306.611
IVGNm33851	AK156856,AK158039,BC050977,BC064015,BC147070,BC147071,NM_199199	mRNA	2245.7	2226.01	1952.44	1544.62	966.294	524.091	352.718
IVGNm32529	AK010715,AK014330,AK018270,AK041700,AK137648,AK169315,BC038262,BC055460,NM_026115	mRNA	2243.7	2227.26	1855.87	1567.8	824.486	235.455	125.797
IVGNm17039	AK006442,AK007138,AK013233,AK021226,AK172500,BC019940,DQ926863,DQ926864,NM_001164355,NM_025581	mRNA	2242.33	2164.92	1309.33	713.447	372.017	275.352	242.467
IVGNm01009	AF245448,AK004951,AK009037,AK016616,AK146414,AK151990,AK154321,AK198375,AK202851,BC006941,BC053737,BC092084,NM_001172561,NM_020011,NM_203280	mRNA	2235.92	2157.72	858.078	339.26	194.605	149.523	133.153
IVGNm13231	AK006594,AK012203,AK013281,AK017477,AK029037,AK032468,AK168105,BC034297,NM_025969	mRNA	2235.4	2290.47	1805.84	1398.11	929.88	752.086	629.511
IVGNm10071	AK034597,AK036926,AK142711,AK146814,AK166604.1,AK167705,AK202692,BC006660,BC015300,NM_001160038,NM_001160039,NM_001160040,NM_145518	mRNA	2234.57	2287.03	2462.06	2300.47	1832.2	1324.6	702.219
IVGNm25018	AF062071,AK076397,AK131911,AK216435,BC048232,BC061693,BC080270,BC107566,BC119124,BC119126,NM_009551	mRNA	2234.43	2890.61	1172.97	532.109	301.494	227.56	255.486
IVGNm20236	AB041664,AJ278576,AK075586,AK169951,AK188768,AK188904,AK202674,AK206681,AK208061,AK209406,AK210173,AK216652,AK217664,AK219043,BC023188,BC068124,BC082317,NM_021554	mRNA	2231.93	2231.6	2122.84	1987.27	1279.69	1027.51	594.531
IVGNm22394	AK002935,AK013509,AK047891,AK160097,BC010197,NM_013494,X61232	mRNA	2229.45	2482.25	2174.91	2275.24	2258.25	2672.37	3510.3
IVGNm09105	AK010864,AK160346,AK168268,AK217197,BC092288,NM_001025586,NM_001025587	mRNA	2228.28	2432.51	1610.27	1187.54	822.357	515.954	490.194
IVGNm16724	AK051201,AK051995,AK053280,AK083412,AK083697,AK084732,AK142764,AK144844,BC060608,NM_001166406,NM_001166407,NM_009004,Y09632	mRNA	2228.04	2155.36	1864.4	1542.56	688.097	342.293	184.37
IVGNm33386	AK088343,AK151598,AK159033,BC002319,BC030739,BC052494,NM_024177	mRNA	2226.45	2478.27	2310.65	1843.32	1004.59	472.226	270.568
IVGNm17013	AB046537,AK004672,AK157854,AK158339,BC039124,BC106088,BC118026,NM_023734	mRNA	2224.29	2464.85	2184.77	2338.91	1989.24	2528.17	2391.06
IVGNm25963	AK004829,BC037638,BC141081,M23568,NM_011626	mRNA	2223.04	2092.59	1569.07	1196.33	761.546	389.464	221.153
IVGNm20292	AK003880,NM_021439	mRNA	2222.1	2018.35	1727.15	1333.22	734.975	429.854	288.528
IVGNm32068	Y11009	ncRNA	2222.05	2471.52	1974.18	1911.3	1722.78	1741.61	1844.93
IVGNm17005	AF230339,AK003714,AK005976,AK019152,BC043016,NM_023162	mRNA	2220.92	2416.73	1497.71	994.547	348.476	148.144	123.114
IVGNm15396	AK020847,AK169814,BC027203,BC031894,NM_029985	mRNA	2218.46	2290.2	1728.27	1037.88	442.909	311.937	259.29
IVGNm06671	AK012297,AK161527.1,AK169268,BC020478,EU604548,L19661,NM_001103165,NM_001103166,NM_001174073,NM_011042,X75947,X97982	mRNA	2217.39	2170.24	2173.07	2357.53	1918.22	2168.16	1797.94
IVGNm31324	AK007511,AK009232,AK009364,AK178252,AK178944,AK188043,AK206577,AK219813,BC064752,BC107214,BC107215,BC132455,BC132457,NM_001164336,NM_027314	mRNA	2215.42	2231.15	1754.18	1282.39	678.13	339.522	187.507
IVGNm33820	AK035228,AK040799,AK049461,AK051441,AK053872,AK150438,AK150896,AK167325,AK219647,BC024090,BC027037,BC027362,BC027403,NM_178645	mRNA	2214.04	2124.25	2199.69	1789.08	1208.76	596.155	283.614
IVGNm30210	AB041612,AK016551,AK044472,AK158995,AK167849,AK168061,AK194385,BC021397,NM_011752,U41287	mRNA	2212.58	2362.47	1937.38	1314.72	656.372	363.367	231.906
IVGNm26604	AB041579,AK165981,AK166109,AK170457,BC003949,BC055833,BC138966,BC138987,NM_021513	mRNA	2210.17	1880.8	582.162	261.572	218.463	231.8	303.128
IVGNm33081	AJ001373,AK002786,AK004172,AK007635,AK075577,AK089937,AK147929,BC021151,BC028772,NM_008403	mRNA	2203.3	2177.29	1955.5	1633.57	952.966	486.35	209.952
IVGNm34326	AK013226,AK038514,AK039788,AK042679,AK045523,AK075994,AK165526,BC013800,NM_025944	mRNA	2202.83	2089.72	901.923	271.571	193.554	160.333	186.588
IVGNm16016	AF157500,AF352179,AK075666,AK075919,AK077721,AK090314,AK150567,AK151208,AK151312,AK151478,AK152305,AK152811,AK152920,AK153101,AK153297,AK159556,AK166757,BC003204,BC027132,NM_019734	mRNA	2201.29	1818.02	2124.29	1986.66	1683.23	1599.65	907.171
IVGNm26478	AF129086,AK002752,AK004464,AK045776,AK158595,AK166630,AK183561,AK209265,BC020110,BC027427,BC038939,NM_019719	mRNA	2200.32	2610.28	2423.65	2165.09	1703.05	1086.14	802.348
IVGNm00865	AK013032,AK018492,AK150724,AK150995,AK151201,AK151915,AK152326,AK154338,BC049571,NM_025779	mRNA	2198.17	2371.78	1885.98	1633.41	1009.02	585.804	373.346
IVGNm01504	AB013912,AK135404,AK144156,AK159112,BC072585,BC115809,BC116693,NM_011304	mRNA	2195.7	2247.42	2130.69	1781.53	1330.54	656.948	353.099
IVGNm00447	AK051240,AK171126	mRNA	2195.66	2077.02	1932.46	1672.24	1261.27	996.23	1049.36
IVGNm20157	AK136370,AK166521,AK170741,AK182212,AK185682,AK211761,BC011433,NM_133655,X59047	mRNA	2193.3	2193.16	2360.14	2443	2168.19	1620.41	724.715
IVGNm10301	AF090190,AF131865,AK014269,AK041278,AK147409,BC059901,NM_207682	mRNA	2189.69	2242.14	1634.82	1381.18	737.079	399.296	188.598
IVGNm31959	AK007511,AK009232,AK009364,AK178252,AK178944,AK188043,AK206577,AK219813,BC064752,BC107214,BC107215,BC132455,BC132457,NM_001164336,NM_027314	mRNA	2188.46	2150.03	1694.29	1239.86	695.815	323.038	191.936
IVGNm24353	AB232615,AK035980,AK172891,BC055042,NM_024454	mRNA	2187.94	2211.06	2102.21	1808.04	1104.38	541.803	243.74
IVGNm19666	AK032421,AK138593,AK141383,AK145641,AK147772,AK154577,AK159314,AK186387,BC048175,NM_009191,U09874	mRNA	2187.8	2329.77	2554.29	2309.07	2130.63	1416.86	747.1
IVGNm07964	AK050014,AK075771,AK075791,AK077853,AK149765,AK153951,AK161834,AK165494,AK166476,AK178848,AK189168,AK215873,BC002318,NM_030248	mRNA	2183.64	2362.11	2478.6	2141.86	1624.07	873.228	756.61
IVGNm02894	AF222801,AK016820,AK141334,BC025080,NM_019816	mRNA	2177.77	2451.69	1944.66	1355.82	515.622	289.71	243.767
IVGNm06101	AK020444,AK135529,BC109331,NM_001110201,NM_029887	mRNA	2177.4	2576.3	2318.35	2522.58	2173.11	1369.76	708.917
IVGNm15342	AK005460,AK051121,AK051628,AK081672,AK159555,AK159871,AK166578,AK167201,AK167613,AK169021,AK169098,AK169410,AK179383,AK180041,AK184231,AK190584,AK208457,AK212516,AK215736,BC039643,BC055711,BC085268,NM_028044	mRNA	2174.53	2184.73	2458.02	2194.77	1473.93	833.635	450.006
IVGNm05332	AF411055,AF439263,AK140254,AK146104,AK146221,AK158522,AK168363,AK189184,BC019587,BC026464,BC026633,BC038068,BC048387,BC060087,NM_080419	mRNA	2174.26	2396.14	2545.77	2464.11	2563.69	2094.69	1564.61
IVGNm22863	AK031081,AK076424,AK133827,AK134890,AK137805,AK147124,AK150341,AK152508,AK159838,AK169681,BC086640,BC088995,L09104,M14220,NM_008155,U89408	mRNA	2173.86	2418.6	2655.9	2730.8	2520.23	2109.32	1292.5
IVGNm21307	AK012625	ncRNA	2170.49	2290.67	1513.13	1281.73	801.065	649.142	546.645
IVGNm05791	AK153866,BC023454,BC043479,BC110677,BC117523,BC117524,NM_011592,U69898	mRNA	2169.06	2054.87	1854.66	1091.22	515.777	328.592	342.745
IVGNm05918	AJ289242,AK030237,AK077839,AK145322,AK150044,AK177458,AK180678,AK183379,AK186329,AK189613,AK189688,BC013616,BC027032,BC087554,DQ303410,DQ303411,NM_021895	mRNA	2165.67	2235.49	2558.93	2527.87	2220.17	1967.09	1273.43
IVGNm00946	AK003756,AK135483,AK158674	mRNA	2163.68	2213.04	927.626	437.951	223.936	189.351	202.862
IVGNm12959	AF166383,AK002801,AK006571,AK009814,AK011320,BC013468,BC145663,NM_020577	mRNA	2163.66	2089.6	2100.62	1858.09	1303.73	705.597	289.242
IVGNm10281	AK013270	ncRNA	2162.62	2062.19	1587.05	1836.87	1781.44	1710.39	2058.23
IVGNm23522	AB063106,AK010662,AK139764,AK152739,AK166804,BC031764,NM_027296	mRNA	2159.86	1915.05	1891.63	1364.14	811.607	520.654	347.587
IVGNm14967	AB015895,AF042383,AK149716,AK150072,AK150734,AK151567,AK168571,AK169071,NM_010178	mRNA	2158.25	2165.12	1944.7	1471.81	1057.03	839.827	760.867
IVGNm16960	AF151637,AK004828,AK008523,AK029409,AK213321,BC002258,BC023013,NM_019936	mRNA	2158.03	1863.71	1802.36	1524.67	997.186	619.154	304.633
IVGNm23564	AK006962,AK015681,AK172289,BC048435,BC116971,BC116973,NM_028850	mRNA	2156.48	2246.42	1573.45	1011	339.99	144.721	107.309
IVGNm01226	AK017469,AK032988	ncRNA	2155.97	1706.32	675.869	439.063	390.404	290.417	211.885
IVGNm33328	AB040054,AF036716,AF093064,AK003297,AK018716,BC038186,BC048167,BC048479,NM_018768	mRNA	2154.55	1946.93	2153.68	1703.95	845.021	301.352	180.644
IVGNm01670	AK002921,AK003436,AK020132,AK027973,AK051257,AK150493,AK150982,AK153329,AK159216,AK159795,AK159926,AK166718,AK167948,AK168886,BC004075,BC005717,NM_026545	mRNA	2154.31	2345.12	2212.87	2278.86	1902.03	1215.47	445.037
IVGNm04595	AB267095,AB359231,NM_001081032	mRNA	2154.22	2366.31	2378.48	2512.64	2332.87	2586.5	2511.95
IVGNm24185	AB007631,AK053816,AK076257,AK133875,AK141851,AK161528,AK163774,AK163787,AK170570,BC012869,BC050830,NM_011156	mRNA	2153.78	2169.98	2309.45	2275.33	1446.38	661.961	233.503
IVGNm06883	AK011196,BC017514,NM_025931	mRNA	2153.05	2100.4	1883.65	1699.17	904.298	323.271	187.406
IVGNm30334	AF187147,AF187148,AK132060,AK162697,BC006714,NM_001177371,NM_001177372,NM_019813	mRNA	2152.05	2196.48	2370.45	1900.42	1129.78	457.932	289.356
IVGNm03962	AK032572,AK143616,AK144669,AK146813,AK146918,BC003741,D63850,FN687734,NM_008233	mRNA	2148.76	2717.59	2284.68	1798.38	1093.43	701.869	699.853
IVGNm07109	AK020187,AK053194,AK085512,AK170390,BC003984,BC042760,BC053329,DQ228000,DQ228001,DQ278602,NM_001024716,NM_001039156,NM_138579	mRNA	2145.21	2292.02	2019.84	2015.74	1670.82	1135.38	678.046
IVGNm06591	AJ130961,AK165620,AK167847,BC049075,BC091740,NM_009456,X97042	mRNA	2142.75	2201.15	1955.78	1754.72	1257.76	728.192	413.506
IVGNm14364	AK030363,AK077877,AK081547,AK087470,AK129027,AK150640,AK151541,AK151791,AK152242,AK153840,AK153886,AK160037,AK160607,AK168505,AK168937,AK169669,AK216214,AX799090,BC028897,BC037612,BC085313,L34260,NM_008408	mRNA	2139.54	1945.25	2083.88	1798.38	1314.81	973.969	434.311
IVGNm02749	AK004083,AK079406,AK153170,NM_011486,NM_213659,NM_213660	mRNA	2138	2309.83	1894.4	1743.18	1097.44	522.434	270.055
IVGNm13846	AK013312,AK076122,BC008247,CT010286,NM_007630,X66032	mRNA	2137.35	2091.79	2013	1760.41	1442.46	851.538	445.868
IVGNm25743	AK134660,BC085173,BC085174,NM_011258,U01222,U07157,U36441,X72711	mRNA	2132.91	2623.23	2118.95	1867.9	1359.32	800.761	338.682
IVGNm33398	AF414433,AK008054,AK008254,AK013474,AK033514,AK148649,AK163362,AK188442,AY138960,AY157057,AY178580,AY566156,BC027433,BC152861,NM_025292	mRNA	2132.65	2190.21	1960.33	1721.56	1205.3	697.058	362.91
IVGNm06087	AK004341,AK016797,AK089003,AK146039,AK152695,BC068254,NM_029406	mRNA	2126.31	2550.72	2322.13	2141.19	1319.15	606.535	432.779
IVGNm15251	AK002756,AK004725,AK010473,AK015692,AK146003,AK168490,BC046972,CT010405,NM_026172	mRNA	2125.48	2236.74	2075.99	1918.52	1459.91	963.06	368.869
IVGNm08129	AK003794,AK004814,AK030554,AK088049,AK145632,AK155759,AK165454,AK167782,AK170826,AK171293,BC023023,BC079854,NM_001168270,NM_133794	mRNA	2125.03	2401.33	2242	1940.81	1255.03	549.938	302.192
IVGNm32462	AK014356,AK135386,AK152290,AK154787,AK168781,BC004851,BC016587,L17076,NM_001139511,NM_001139512,NM_001139513,NM_023130,S72641	mRNA	2124.37	1873.78	2005.89	1777.63	1333.44	704.975	322.656
IVGNm21228	AK003962	ncRNA	2122.6	1775.69	1652.28	1338.48	922.716	636.775	244.547
IVGNm23170	AK149789,AK157834,BC003802,NM_009357,X81058	mRNA	2122.26	2531.26	2209.42	2166.07	1970.63	1705.24	1263.63
IVGNm08136	AK032956,AK036651,AK048556,AK164646,AK173207,BC006896,NM_133804	mRNA	2120.98	2228.22	2313.27	2061.7	1774.44	1358.78	771.313
IVGNm05087	AK034641,AK151023,AK152131,AK165594,AK168270,BC003799,NM_009190,U10119	mRNA	2115.35	2170.57	2015.98	1662.67	907.458	429.278	222.472
IVGNm16281	AB049633,AK002509,AK077857,AK145687,AK169272,AK178144,AK182569,AK184941,AK206417,AK214851,BC011128,BC016586,BC034877,NM_053159	mRNA	2114.96	2491.77	1866.17	1458.85	736.958	258.698	150.049
IVGNm15225	AK011617,AK017310,AK018306,AK169111,BC002265,BC019490,BC080676,NM_001110809,NM_025663	mRNA	2113.2	2974.43	1849.87	1029.31	792.435	550.614	417.794
IVGNm16159	AK002690,AK003870,AK077700,AK170445,AK179061,AK184756,BC005745,NM_026635	mRNA	2112.48	2094.93	1964.85	1812.54	1528.26	1274.4	999.016
IVGNm18347	AK030332,AK138575,AK149782,AK170532,NM_001033273	mRNA	2111.55	2538.84	1838.69	1404.63	876.477	463.967	202.485
IVGNm00936	AF150103,AK003368,AK003421,AK010994,AK131168,AK166190,BC009158,NM_019502	mRNA	2110.85	2317.6	1689.89	1398.04	972.504	648.789	510.621
IVGNm30040	AK134435,AM748258,NM_001167923	mRNA	2109.76	2107.05	1934.41	1803.23	1569.66	970.186	558.606
IVGNm15178	AF272847,AK179158,AK180570,AK210812,AK214936,AK216272,AY034062,BC037486,BC049227,BC055468,BC080848,BC089305,NM_023603	mRNA	2108.93	2002.09	1457.52	998.91	423.5	308.048	273.254
IVGNm23730	AK141241,AK143972,AK171220,AK218719,BC003975,NM_001170341,NM_145385	mRNA	2108.84	2273.06	2619.12	2539.62	2209.2	1177.32	454.111
IVGNm21481	AK014456,AK029436,AK040841,AK145277,AK150349,AK151832,AK152586,AK152887,AK159476,BC006893,NM_001079814,NM_028720	mRNA	2108.39	2461.49	1881.43	1747.57	1147.7	714.084	409.942
IVGNm05446	AF334609,AK004135,AK008178,AK010504,AK013334,AK018039,AK084933,AK151176,AK152214,AK166903,BC037602,BC069930,NM_178601	mRNA	2106.51	2188.53	2196.74	1795.6	1222.13	632.768	315.383
IVGNm34386	AK004819,AK158577,AK171637,AY424300,BC021914,BC034117,NM_026178	mRNA	2106.25	1802.15	1922.95	1795.37	1551.16	1255.4	839.364
IVGNm18203	BC052042,BC058968,BC079643,NM_001003913,NM_001171582	mRNA	2105.88	2348.24	2603.44	2165.94	1401.43	669.71	306.46
IVGNm32429	AF155739,AK080468,AK143177,AK166666,AK167246,AK168555,BC025029,NM_020575	mRNA	2103.95	2227.35	1322.92	741.392	566.428	553.988	502.029
IVGNm28791	AK029217,AK137576,AK139342,BC068234,NM_007513	mRNA	2101.69	2424.92	1615.89	1334.5	875.881	472.24	242.948
IVGNm01269	AK039375,AK154547,AK167496,BC067015,NM_008776,U57746	mRNA	2100.31	2000.58	1944.64	1462.17	850.026	373.209	238.955
IVGNm24414	AF465615,AK077151,AK078424,NM_026201	mRNA	2099.06	2002.78	1784.16	1158.84	587.828	455.946	347.609
IVGNm31620	AF412035,AK002497,AK003386,AK008966,AK151986,AK206411,AK208610,AK214912,BC093484,BC117987,NM_025375	mRNA	2098.48	2507.28	1988.49	1861.35	1316.15	785.768	393.363
IVGNm03472	AB070267,AK075600,AK075947,AK153126,AK162087,BC003457,NM_001199274,NM_134017	mRNA	2098.06	1769.55	1405.65	852.211	388.586	231.093	173.769
IVGNm02195	AJ308624,AJ308636,AK156410,BC048168,BC056997	mRNA	2097.19	2052.65	611.997	301.948	251.509	234.097	187.194
IVGNm05357	AK134057,AK145740,AK167700,BC005786,BC066163,BC066848,NM_144530	mRNA	2095.55	2092.86	1557.98	1044.61	770.214	603.605	526.978
IVGNm24395	AK011383,AK076160,AK149856,AK151168,AK151966,AK152108,AK160216,AK166097,AK168194,BC020132,NM_025936	mRNA	2095.24	2208.66	2156.31	1678.34	770.041	242.235	116.402
IVGNm21130	AK006207,BC027637,NM_026617	mRNA	2093.83	2599.38	1937.63	1904.78	1445.02	886.201	454.586
IVGNm15578	AK039812,BC052148,NM_175287	mRNA	2092.68	2157.13	933.561	528.703	275.119	206.715	164.143
IVGNm27075	BC158106,BC158108,BC168402,NM_001081192	mRNA	2090.59	2202.86	1849.44	1812.95	1451.09	1415.67	1175.28
IVGNm12797	AF153613,AK009478,AK170778,BC001983,NM_001110331,NM_001110332,NM_011868	mRNA	2089.73	2244	1832.93	1576.7	1370.02	883.731	566.159
IVGNm11048	AK076065,AK076422,AK077717,AK077920,AK078404,AK082800,AY550907,BC068181,NM_026560	mRNA	2089.01	2083.13	1993.03	1466.53	700.187	326.389	236.975
IVGNm17023	AK147022,AK150557,AK151231,AK152742,AK165777,BC004749,BC019817,NM_001159626,NM_024284	mRNA	2086.39	2235.29	1865.48	1765.89	1505.39	1091.05	506.958
IVGNm26236	AK159290,BC005474,NM_013901	mRNA	2084.49	2059.86	1855.06	1740.96	1320.42	1224.34	692.298
IVGNm06303	AK169518,BC029219,BC046971,NM_176849	mRNA	2084.17	2184.54	1913.7	1224.97	894.414	869.608	921.731
IVGNm03531	AK028898,BC006019,NM_011018,U40930,U57413	mRNA	2083.79	2242.58	2451.81	2228.9	1285.45	492.141	217.132
IVGNm28402	AK002469,AK154726,AK208539,BC004755,BC052500,NM_013677	mRNA	2081.75	1991.98	1694.23	1148.37	633.842	330.716	230.836
IVGNm31144	BC011230,NM_027289	mRNA	2080.03	2192.08	2482.44	2658.37	2309.04	1639.42	842.32
IVGNm06618	AK002446,AK006711,AK030925,AK054480,BC024378,BC053379,BC058116,NM_001113358,NM_010015,U22107,U83628	mRNA	2078.28	2269.91	2033.11	2071.23	1838.23	1323.97	1171.16
IVGNm11039	AF343079,AK075921,AK148974,AK149702,AK150037,AK165724,AK166099,AK172038,AK172350,BC023301,BC058373,BC060036,NM_179203	mRNA	2077.7	2299.08	1893.03	1437.66	796.063	408.882	309.599
IVGNm06002	AK004661,AK007498,AK008971,AK009483,AK010529,AK014413,AK016275,AK017876,AK030045,AK086727,AK135968,AK162267,AK167391,BC006895,BC018188,BC026558,BC064749,NM_026168,NM_026355	mRNA	2076.39	1900.95	1901.07	1550.11	1282.69	1052.44	912.555
IVGNm03413	AK129350,AK154063,AK162686,BC031531,NM_177325	mRNA	2075.06	1841.91	1380.54	804.073	415.037	299.005	253.808
IVGNm03936	AK014754.1,AK014754.2,AK018722.1,AK018722.2,AK019234.1,AK019234.2,AK029149,AK052649,AK084454,BC031496.1,BC031496.2,BC089534.1,BC089534.2,BC100330.1,BC100330.2,NM_001083938,NM_026611	mRNA	2074.27	2322.81	2130.35	2097.74	1971.69	1549.5	763.52
IVGNm17320	AK076912,AK146923,BC024400,NM_146089	mRNA	2073.63	2400.41	2050.26	1744.39	1229.65	679.211	409.128
IVGNm11904	AK015369,AK075982,AK075983,BC013079,NM_026453	mRNA	2073.5	2086.63	1543.43	823.067	368.618	196.754	138.778
IVGNm34334	AK007377,AK008007,AK009527,AK132279,AY071852,BC026442,BC037657,BC046825,BC094629,BC125606,BC125608,NM_025970	mRNA	2072.6	2613.06	2003.33	1980.13	1756.49	1101.38	583.977
IVGNm16982	AK076180,AK147168,BC021778,NM_021419	mRNA	2071.51	2064.77	826.652	347.687	259.788	240.723	258.34
IVGNm15219	AK007811,AK013133,AK132927,AK139748,BC019668,NM_025579	mRNA	2070.48	2327.41	1967.92	1650.9	980.504	492.765	289.684
IVGNm21893	AK149743,AK150516,AK151421,AK151569,AK151824,AK152082,AK152827,AK152860,AK153159,AK153273,AK156489,AK165450,AK165822,AK166125,AK172384,BC002055,D21207,L17306,NM_009775	mRNA	2070.37	2525.09	2123.46	2153.94	1975.62	1530.08	752.817
IVGNm00001	AB029142,AB029143,AB029144,AB029145,AB029146,AF013099,AF175574,AK010969,AK145524,AK187289,AK188053,BC009005,BC016433,NM_008951	mRNA	2070.28	2106.73	1987.18	1674.32	1135.14	528.821	293.088
IVGNm33411	AK016662,AK032388,AK034885,AK149005,BC039647,BC053488,NM_025441	mRNA	2069.03	1935.09	1761.74	1346.18	897.565	479.796	354.815
IVGNm11218	AK013562,AK076138,BC094384,NM_171824	mRNA	2068.85	1963.53	1027.48	520.73	250.662	207.321	171.948
IVGNm21214	AK003316,AK153261,AK167479,AK167694,AK220470,BC079898,NM_175341,NM_207515	mRNA	2068.66	1703.04	1667.37	1292.86	805.072	417.982	269.317
IVGNm00286	AK032042,BC022753,BC040217,BC106167	mRNA,ncRNA	2068.26	1957.3	1800.64	1593.88	1087.91	740.033	738.389
IVGNm23172	AK002270,AK010808,AK146013,AK149768,AK150735,AK159741,AK167437,AK168060,AK168446,AK168756,AK199207,BC004024,BC046761,NM_009415,X53333	mRNA	2068.22	2204.98	2184.26	2192.79	2138.75	1508.28	827.836
IVGNm28766	AK020563,AK156576,BC030941,BC056466,NM_198163	mRNA	2067.36	2185.4	1300.79	664.557	298.674	218.591	202.318
IVGNm16714	AK045985,AK182333,BC148378,DQ906042,NM_008799,U10903	mRNA	2066.84	1995.2	1003.81	547.978	343.808	231.377	156.728
IVGNm21706	AJ312390,AK087164,AK131171,AK147203,AK147206,AK147208,AK147209,AK147210,AK147211,AK147215,AK147216,AK147221,AK147222,AK147223,AK147233,AK147235,AK147296,AK147407,AK147430,BC026521,BC054360,NM_022410	mRNA	2060.6	2587.79	2376.25	2224.78	1984.23	1581.02	788.283
IVGNm27860	AK002459,AK012818,AK032458,AK135503,BC005779,BC083091,NM_025321	mRNA	2058.49	1858	2331.4	2272.77	1919.98	1117.26	279.581
IVGNm24536	AK028517,AK030740,AK034070,AK034414,AK158197,BC017540,BC030922,BC034656,NM_030203	mRNA	2057.39	2044.68	1546.23	1167.67	733.297	549.387	583.259
IVGNm22395	AK002966,AK165395,AK189516,AK219734,AY186239,BC069959,NM_175935	mRNA	2057.07	2337.16	2026.06	2090.77	1939.72	1657.83	1544.15
IVGNm05422	AB049825,AK078816,BC039951,NM_001145804,NM_175294	mRNA	2056.52	3076.64	2008.81	1872.53	1816.37	1461.98	1321.28
IVGNm34433	AK033812,AK129342,AK164739,AK169378,BC019690,BC037675,BC041108,BC048178,BC049271,BC057454,NM_175121	mRNA	2055.41	1397.04	479.601	192.285	150.629	148.074	122.183
IVGNm11106	AF124788,AF190796,AK003618,AK088312,BC029249,NM_011722	mRNA	2054.85	1863.68	1777.49	1436.03	1130.76	657.645	353.096
IVGNm19430	AJ242909,AJ242911,AK007240,AK155292,BC004689,NM_001164187,NM_019542	mRNA	2052.86	1983.19	1880.33	1446.55	972.826	514.838	404.437
IVGNm26889	AK210656,BC023701,BC023827,BC032174,BC032175,BC070421,NM_001001491	mRNA	2052.8	2245.86	2248.76	2176.2	1631.18	1331.2	863.7
IVGNm05720	AJ006215,AK087150,AK155730,BC004606,BC031500,BC063776,NM_009908	mRNA	2051.74	1965.49	1964.56	1792.55	1353.69	690.967	287.759
IVGNm06826	AB043006,BC023290,BC053425,BC053438,NM_022324	mRNA	2049.85	2159.94	2035.18	1765.65	1257.96	980.789	582.422
IVGNm15942	AF049125,AK041996,AK076153,AK077486,AK078106,AK169765,BC132320,BC145668,NM_011992	mRNA	2048.49	1723.15	1891.25	1752.24	1624.66	1796.81	1787.8
IVGNm24309	AK028702,AK035169,BC005436,NM_020558,X95591	mRNA	2048.19	1992.71	1872.26	1541.13	1149.81	758.875	419.784
IVGNm17096	AK003500,AK050273,AK144153,BC027021,NM_026732	mRNA	2046.33	2360.87	1848.46	1381.34	709.309	247.762	170.409
IVGNm08272	AK002959,AK007795,AK009922,AK041314,BC021589,NM_025559	mRNA	2045.93	2124.32	2063.14	2017.39	1996.19	1940.23	1411.1
IVGNm12097	AK012478,AK031584,AK047089,AK139212,NM_001081458,NM_001135001,U59418	mRNA	2044.65	2244.36	1867.63	1718.44	1317.59	1097.7	755.622
IVGNm15212	AK006281,AK009165,BC023669,BC054085,NM_025513	mRNA	2043.95	1801.93	907.698	440.831	144.968	77.6141	67.9421
IVGNm27659	AK004880,AK009444,AK012943,AK083938,AK166839,AK169877,AK170449,AK171601,BC034131,BC076590,NM_001024945,NM_023268	mRNA	2042.81	2412.31	1900.95	2036.49	1814.93	1852.46	1445.25
IVGNm28345	AJ238741,AJ238742,AJ238743,AK010360,AK049418,AK159866,BC006959,BC031747,NM_020580	mRNA	2042.46	2103.49	2238.44	2065.94	1655.72	1162.58	674.248
IVGNm13645	AK076070,AK076264,AK078398,AK141421,AK146873,AK147165,AK152387,AK152793,AK159939,AK166318,AK166429,AK167550,AK180731,AK183976,AK188801,AK219793,BC002171,BC019740,BC025439,BC048081,NM_146087	mRNA	2039.31	1974.14	1804.5	1317.47	632.252	255.715	162.913
IVGNm05198	AB017270,AB041565,AK029307,AK076254,AK135038,BC034850,NM_019790	mRNA	2038.71	1973.08	1554.67	1257.99	672.854	318.135	172.271
IVGNm31057	AK050135,AK151863,AK160264,AY540996,AY540997,BC009659,NM_134079	mRNA	2036.3	1801.34	2152.36	2030.09	1768.75	1686.84	1036.2
IVGNm24940	NM_001042580	mRNA	2035.41	2123.66	1971.54	1810.45	1579.57	1333.59	885.475
IVGNm33449	AK014362,AK019464,AK078090,AK151228,AK151839,BC009092,EF410121,NM_026313	mRNA	2034.89	2723.21	1460.44	914.239	640.641	443.88	470.027
IVGNm33050	AK117104,AK135807,AK136193,AK153399,AK167885,AK168157,AK168875,AK193031,BC003368,NM_007861,U73445	mRNA	2034.19	1947.43	1770.22	1462.29	1062.22	614.089	342.245
IVGNm24376	AK012917,AK019970,AK036330,AK135550,BC027401,NM_025602	mRNA	2032.6	2796.77	1737.94	1169.92	809.23	671.417	801.352
IVGNm34303	AK003895,AK007374,AK159267,BC050900,BC052077,NM_025845	mRNA	2032.57	1809.59	1212.08	779.92	824.191	936.212	1118.49
IVGNm34385	AK004763,AK008075,AK028829,AK029095,AK030115,AK030223,AK134178,AK160061,BC010727,BC029753,NM_026175	mRNA	2032.34	2032.19	1389.58	753.782	280.889	147.122	135.989
IVGNm23032	AK131594,AK141724,BC048625,BC055794,BC100514,BC147444,BC147468,NM_001033458	mRNA	2030.55	2209.11	1599.79	1712.15	1614.06	1117.37	855.978
IVGNm33015	AK003244,AK003612,AK045408,AK136358,BC023039,NM_001038230,NM_025389	mRNA	2028.23	1954.93	1922.76	1951.37	1898.15	1647.92	1141.78
IVGNm28450	AK076156,AK089934,AK135632,AK143664,AK146969,AK148957,AK150359,AK151684,AK153029,AK166831,AK166932,AK167918,AK168461,AK168532,AK168707,AK168725,AK168829,AK169041,AK169670,AK213866,AK217606,AK218612,AK219663,BC023143,BC060377,J04953,NM_146120	mRNA	2027.99	2327.61	2196.78	2289.05	1978.06	1500.4	625.928
IVGNm11844	AK086050,AK160524,BC064088	mRNA,ncRNA	2027.76	1872.53	1716.61	1545.11	1083.64	723.047	321.798
IVGNm34605	AK007503,BC030425,BC115584,BC115585,NM_026940	mRNA	2027.21	2584.91	1623.45	1435.31	905.68	452.844	233.221
IVGNm15286	AK003787,AK152794,AY033432,BC051484,NM_026780	mRNA	2027.04	1853.07	2026.41	1478.3	978.36	406.12	209.677
IVGNm34218	AK007811,AK013133,AK139748,BC019668,NM_025579	mRNA	2024.25	2096.23	1747.63	1494.11	938.062	507.206	327.949
IVGNm10374	AF142670,AK019111,AK145250,BC086615,NM_017377	mRNA	2023.12	2367.11	1868.14	1647.61	1242.81	933.288	647.686
IVGNm29121	AB030242,AK136511,NM_053090	mRNA	2022.48	1793.97	1510.5	1148.3	668.191	448.968	272.667
IVGNm04359	AK008544,AK008556,AK038203,AK147232,AK153220,AK164875	mRNA,ncRNA	2022.41	1720.34	1537.17	1229.7	748.707	341.877	189.553
IVGNm30243	AB047557,AK146326,AK148778,AK153969,AK159601,AK164425,AK181285,AK186181,AK193241,AK197216,AK201403,AK202072,AK204298,AK211848,AK217336,BC004082,BC016202,BC058331,BC062885,BC084729,NM_133347	mRNA	2022.09	2225.98	1761.72	1285.48	697.586	426.162	338.95
IVGNm25120	AF143680,AK011366,AK181583,BC052938,BC060259,BC080803,NM_019722	mRNA	2021.77	2026.65	2009.18	1752.39	1273.58	837.46	621.204
IVGNm34221	AK007443,AK008341,AK019298,AK036279,NR_024069	mRNA	2019.41	2414.5	1886.49	1533.24	853.634	477.441	420.648
IVGNm32206	AK019861,AK032197,AK159150,AK159766,AK189076,AK196352,BC018534,J05261,NM_001038492,NM_008906	mRNA	2018.58	2073.63	2149.34	2204.67	2174.23	2046.16	2115.6
IVGNm06892	AK011914,AK082752,BC047997,NM_026001	mRNA	2015.36	2186.02	1956.21	1723.89	943.714	426.268	211.181
IVGNm00798	AK086135,AK159316,AK163982,AK165547,AK165923,AX775987,BC023071,L36962,NM_001161824,NM_013604	mRNA	2015.03	2167.21	1942.68	1658.79	1208.88	604.88	394.733
IVGNm25221	AK006541,AK034942,AK145894,AK150542,AK150663,AK151378,AK161024,AK168019,AK178323,BC031544,NM_027976	mRNA	2013.97	2171.94	2162.24	2038.3	1598.96	1163.23	713.072
IVGNm32387	AK031489,AK145937,AK153397,AK183978,BC002056,NM_015765,U08215	mRNA	2013.71	2185.19	1833.16	1322.7	612.853	256.961	160.546
IVGNm32326	AK002823,AK012613,AK013961,AK031913,AK075759,AK088276,AK088765,AK162002,AK168823,BC033424,BC049230,BC057662,D83585,NM_011187,Y10874	mRNA	2013.66	1655.2	1793.33	1604.61	1117.39	449.653	153.226
IVGNm33456	AK002381,AK007276,AK007934,AK010272,AK013834,AK019396,AK078417,AK084116,AK160922,AK161289,AK195867,AK211485,AK216733,BC115661,BC115662,NM_026542	mRNA	2013.31	2229.6	2247.96	2413.59	2483.01	1958.95	1396.42
IVGNm33484	AK008161,AK131884,BC008158,NM_027320	mRNA	2012.99	2017.14	1708.1	1302.01	646.281	360.398	287.809
IVGNm17432	AK035150,AK122418,BC145121,NM_178880	mRNA	2011.18	1936.4	1546.01	980.608	621.616	474.636	280.701
IVGNm18691	AK021201,BC063267	mRNA	2009.57	2081.8	1707.13	1502.05	1177.29	859.05	1048.87
IVGNm15298	AK081511,AK137854,AK141191,AK146719,AK192239,BC055763,BC138145,BC145162,NM_001093752,NM_001093753,NM_026989	mRNA	2006.69	2477.89	2221.6	1735.83	1285.91	967.931	923.033
IVGNm20988	AK011422,AK012191,AK090019,AK146262,BC011060,BC052530,NM_145706	mRNA	2005.9	2234.3	1115.25	413.745	200.842	136.989	125.642
IVGNm11041	AK075925,AK169741,BC024734,BC025853,BC059875,BC139277,BC139305,CT010186,NM_172697	mRNA	2003.22	2185.5	1842.15	1196.34	506.378	297.693	194.134
IVGNm04703	AF173379,AK010264,AK050072,AK205191,NM_016892	mRNA	2002.89	2385.13	1792.72	1545.01	964.866	571.156	473.882
IVGNm33218	AK140597,AK150939,AK156079,AK171348,BC005524,BC015255,BC139818,CT010198,D87911,NM_011192,U60330	mRNA	2002.29	2275.05	1732.87	1549.86	1119.27	908.79	618.786
IVGNm13419	AK003774,AK077377,AK132663,AK220301,BC003443,BC094342,NM_001033174	mRNA	1998.56	1927.33	1424.51	1022.02	485.238	297.822	191.467
IVGNm07138	AK079161,AK079852,AK087969,AK207801,BC004644,BC011095,NM_145462	mRNA	1998.37	2275.97	1906.32	1710.9	1200.21	678.282	365.67
IVGNm07537	AK002936,BC022589,NM_028863	mRNA	1997.18	2125.42	1837.34	1682.1	1442.76	1188.61	1066.86
IVGNm16104	AK003836,AK013925,AK154600,BC051198,NM_025485	mRNA	1995.16	2224.94	1200.58	568.794	148.152	75.7738	65.6699
IVGNm21944	AK002504,AK003530,AK047170,AK049706,AK077738,AK078459,AK153271,AK161950,AK165941,AK166899,AK170507,AK170751,AK185054,BC002285,BC016410,BC046802,NM_016843,X61506	mRNA	1992.55	2130.79	1959.89	1873.27	1504.89	865.159	307.548
IVGNm32757	AK004692,AK015059,AK152169,AK166988,AK216108,BC024124,BC030875,BC039957,BC054095,BC092291,NM_146126,U27014	mRNA	1992.4	1895.4	1828.02	1889.86	1672.03	1349.4	622.465
IVGNm13004	AK011440,AK147462,AK147561,AK159518,AK217803,BC030928,BC047152,BC095963,NM_022012	mRNA	1990.82	2057.79	906.422	379.761	254.351	196.261	181.657
IVGNm03610	AK082852,AK136949,AK165902,BC021489,BC060715,GU189417,NM_176850	mRNA	1988.71	1644.83	960.909	546.691	324.185	224.001	134.639
IVGNm08713	AK011175,AK019145,AK078068,BC056393	mRNA,ncRNA	1986.26	1980.22	1696.6	1535.29	1307.38	1099.1	928.759
IVGNm09904	AK017226,AK083056,AK139649,AK177098,AK177568,AK178118,AK180795,AK180892,AK181587,AK183296,AK183556,AK188151,AK199555,AK207673,AK207808,AK209807,AK210863,AK212140,AK212284,AK212704,AK212777,AK213477,AK214594,AK214622,AK215829,AK216481,AK216685,AK218828,AK219490,BC016597,BC059229,NM_029409	mRNA	1983.03	1996.75	1994.68	1740.34	1328.99	859.282	581.313
IVGNm34144	AF164513,AF175324,AK011536,AK146338,AK159188,BC033276,BC049880,NM_019752	mRNA	1982.25	2125.33	2083.12	1753.12	1298.46	880.533	788.087
IVGNm04760	AK148147,AK160458,BC016644,BC038010,BC058533,BC125337,BC132337,NM_008044,U95736	mRNA	1981.84	2245.8	1877.48	1591.35	1038.12	498.899	336.863
IVGNm06167	AK177284,AK178502,AK216951,BC008543,BC024632,BC062108,NM_133949	mRNA	1979.33	2429.4	2497.46	2409.21	2288.69	1347.3	942.826
IVGNm06623	AK031241,AK136212,BC005796,L26316,NM_010049,V00734,X56066	mRNA	1978.86	2058.44	1815.19	1710.39	1210.23	710.939	360.099
IVGNm27327	AJ401376,AK137327,BC078637,NM_027402	mRNA	1977.73	1941.17	1618.81	1414.06	1205.07	884.77	473.12
IVGNm01339	AK016482,AK049198,AK161312,BC053515,BC062139,NM_023764	mRNA	1973.99	1859.2	1531.14	1311.79	875.174	580.304	354.657
IVGNm21438	AF435792,AK002378,AK003241,AK007897,AK019936,AK159841,BC025569,NM_025839	mRNA	1972.64	2243.04	1795.92	1606.42	1212.25	792.971	568.123
IVGNm23785	AK004686,AK088893,AK089067,AK147112,AK160743,AK166168,AK166416,AK166623,AK168141,AK168512,AK169379,AK171283,AK216562,AK217507,BC046832,M27073,NM_172707	mRNA	1969.84	1812.62	2285.8	2046.94	1482.11	1523.37	1067.64
IVGNm10977	AK132870,AK141288,BC006867,BC151176,BC151177,BC156481,BC172695,NM_172304	mRNA	1969.22	1904.58	997.106	513.096	309.325	262.235	250.938
IVGNm00027	AK004536,AK047941,AK083784,AK089100,AK143821,BC062098,BC080774,BC100390,BC119316,BC119318,NM_175095	mRNA	1968.98	2567.83	1328.18	952.087	303.388	130.091	90.8764
IVGNm15732	AK146499,AK151200,AK151322,AK151586,AK152718,AK152766,AK153341,AK159133,AK159153,AK159586,AK159701,AK159986,AK160080,AK160854,AK166669,AK168852,AK169155,AK169270,AK170110,AK185178,AK189307,AK190992,AK196704,AK198404,AK200400,AK216659,BC012497,BC046302,BC085300,EF437356,NM_007509,Y12634	mRNA	1968.09	1837.59	2073.32	1781.55	1271.97	515.023	217.183
IVGNm25929	AK008549,AK088864,AK158539,AK167475,AK182842,AK194521,AK198898,AK205504,BC024638,NM_019678,U94662	mRNA	1966.16	1955.64	1775.53	1278.47	638.071	344.302	248.624
IVGNm06487	AK002895,BC005688,BC064104,NM_007596,U21960	mRNA	1965.5	1787.06	784.504	291.542	209.415	191.92	208.682
IVGNm12926	AB041573,AF110733,AF124994,AF197951,AK002383,AK003332,AK009858,AK136130,AK152653,BC008174,BC014682,NM_012021	mRNA	1963.65	2133.49	2006.87	1749.61	1322.8	743.719	612.7
IVGNm15839	AF022957,AK020753,BC062899,NM_009672,U73478	mRNA	1962.98	680.412	1665.8	758.26	968.037	405.926	313.697
IVGNm16223	AK003644,BC020119,BC027419,BC087734,NM_028617	mRNA	1960.23	2224.27	2103.63	2183.42	1642.8	649.464	314.15
IVGNm19151	AK013085,AK013188,AK051268,AK147885,AK155987,AK159925,AK160727,AK161092,AK171825,AK179883,AK199788,BC006886,NM_025482	mRNA	1956.28	2135.28	1743.67	1326.3	605.592	299.342	170.675
IVGNm20211	AK011525,AK011894,AK160139,BC038029,NM_026004	mRNA	1955.96	1780.86	1564.28	1230.2	894.586	653.636	473.89
IVGNm17103	AK010431,BC009147,BC046781,BC138204,BC138205,NM_026987	mRNA	1953.44	2157.79	2015.55	1675.11	996.531	438.146	266.442
IVGNm10181	AK003892,AK049526,AK088325,AK150933,AK168645,BC035539,BC057191,BC064732,BC066222,BC080760,BC137735,BC145655,NM_172400	mRNA	1953.31	2396.04	1908.22	1700.81	1098.75	630.138	344.017
IVGNm32420	AF156958,AK003254,AK168314,BC023672,NM_001110159,NM_019761	mRNA	1951.59	1756.87	451.84	201.766	150.549	176.937	188.182
IVGNm11573	AF309554,AK010283,AK012342,AK013114,AK077037,AK142498,AK153862,AK167706,BC023026,EF011623,NM_001025375,NM_001025376,NM_023191	mRNA	1946.39	1810.09	1586.86	1273.1	795.597	304.287	141.733
IVGNm23680	AK010922,AK076453,AK138423,AK140160,AK148764,AK168739,AK185794,AK186697,AK187118,AK215777,BC016670,NM_133768	mRNA	1943.98	2042.24	1972.81	1814.36	1359.24	716.552	474.226
IVGNm11586	AF139659,AK078405,AK163256,BC080739,NM_001163791,NM_019716	mRNA	1939.49	2073.51	1226.86	847.878	441.547	339.963	323.834
IVGNm17487	AK028121,BC027265,BC096047,NM_019435,Y08702	mRNA	1939.35	2243.61	1872.93	1879.81	1605.55	1114.41	692.83
IVGNm22308	AK035696,AK075773,AK081798,AK088813,AK089887,AK098093,AK151639,AK152366,AK159987,AK167972,AK168164,AK170802,AK170971,AK170972,AK171140,AK186577,AK189329,AK196361,AK207834,AK209711,AK218872,BC023961,BC025533,BC029144,BC032184,NM_145925	mRNA	1939.25	2002.91	1805.07	1720.76	1502.68	1051.16	479.751
IVGNm07992	AK034534,AK132463,AY692438,BC145666,BC146023,NM_001004140	mRNA	1939.23	1823.18	1292.37	740.701	432.024	385.015	309.206
IVGNm00102	AK013673,AK147442,BC056343,NM_019972	mRNA	1939.2	1890.27	1691.4	1506.21	1148.27	902.625	465.686
IVGNm05934	AK008735,AK031949,AK076760,AK076773,BC014742,BC058612,NM_023403	mRNA	1937.37	2321.16	1888.92	1452.41	879.224	505.828	289.128
IVGNm14219	BC044927,J03953,NM_010359	mRNA	1936.75	1852.06	1765.55	1767.04	1680.12	1880.71	1626.81
IVGNm03717	AK007476,AK010088,AK195530,AK196859,AK198167,AK199959,AK202196,AK202604,AK202727,AK205050,AK207526,AK208901,AK210760,AK217921,AK219415,BC017139,BC060049,BC072660,BC079539,NM_025877	mRNA	1936.54	1980.13	1821.09	1704.92	1533.09	1237.88	708.211
IVGNm05283	AK010503,AK041342,AK144692,AK162118,AK167440,BC049091,BC050812,NM_028043	mRNA	1934.93	1923.34	1012.84	497.086	184.05	94.363	78.979
IVGNm23770	AK047265,AK077650,AK077780,AK156299,BC023732,BC023925,BC026571,BC029675,NM_153680	mRNA	1931.74	1952.96	1994.66	1775.85	1359.84	655.754	327.802
IVGNm33802	AK017508,AK139389,AK171307,BC026908,BC048942,BC060257,NM_177777	mRNA	1931.54	1896.41	572.419	435.806	453.684	476.467	484.38
IVGNm03751	AK011719,AK012533,AK012762,AK014084,AK163310,BC079900,NM_025642	mRNA	1931.15	1933.62	1720.5	1629.81	1254.17	905.462	438.501
IVGNm07998	AK003583,AK155199,AK157161,AK159082,AK159789,AK202169,BC026964,BC052154,NM_020625	mRNA	1929.5	1721.21	689.451	268.053	174.92	180.689	175.087
IVGNm34289	AK002352,AK004516,AK013170,AK146101,AK151975,AK168603,AK170602,AK177325,AK181448,AK185101,AK187064,AK187101,AK188079,AK208971,BC004595,NM_025793	mRNA	1929.13	2014.96	1651	1559.1	1235.14	1034.94	813.516
IVGNm16300	AF378525,AK030575,AK076756,AK078819,AK079338,AK181114,AK189177,AK216619,BC006765,BC086770,NM_001168621,NM_001168622,NM_001168623,NM_133206	mRNA	1928.87	2274.56	1743.22	1189.84	964.022	915.662	1048.74
IVGNm17192	AK030553,AK034643,AK167839,BC039701,BC085181,BC094508,NM_030201,NR_027492	mRNA	1927.18	1842.68	1721.39	1539.14	1195.94	696.718	351.774
IVGNm02245	AK032875,AK168759,BC021353,NM_025626	mRNA	1926.31	1859.07	1478.29	1187.84	646.908	308.249	192.755
IVGNm19850	AK077677,AK170480,BC019964,NM_145573	mRNA	1925.55	1705.06	1296.46	822.738	304.578	144.288	112.194
IVGNm33083	AF055665,AK014256,AK031309,AY753300,NM_001025360,NM_008450	mRNA	1924.93	2204.35	2117.03	2003.9	1816.39	1613	1496.72
IVGNm26480	AB025406,BC131926,NM_019771	mRNA	1924.13	1554.53	1790.28	1619.91	1387.65	1395.64	1129.8
IVGNm11419	AK035009,AK045917,AK122527,BC056927,NM_173016	mRNA	1922.76	2063.77	2120.73	2104.07	1866.45	1297.9	622.819
IVGNm32694	AK007535,AK150756,AK152302,AK165618,AK167622,AK179626,AK182076,AK186434,AK210838,BC006882,NM_133705	mRNA	1922.68	2171.56	1686.17	1366.16	836.764	319.853	133.722
IVGNm17243	AK004074,AK008289,AK008854,AK018016,AK133947,AK148083,AK162834,AY038184,BC132127,BC132129,NM_080837	mRNA	1921.48	1927.56	2072.63	1954.66	1710.63	1471.8	1060.02
IVGNm23389	AK011353,AK011649,AK075997,AK154681,BC004812,BC023028,BC099370,NM_020022	mRNA	1920.84	2157.4	2090.42	2039.06	1531.37	1021.87	609.06
IVGNm06636	AK047915,AK079570,AK088480,AK138271,AK148449,AK148540,AK150625,AK161679,AK166602,AK167997,BC014858,J03535,NM_010330	mRNA	1919.68	1869.56	1934.82	1962.35	1664.86	1913.8	1468.64
IVGNm25119	AF143241,AK048644,AK185320,AK192226,BC042941,NM_019718	mRNA	1919.51	2017.2	1807.42	1708.75	1340.8	802.177	366.869
IVGNm15284	AK003553,AK034728,AK160341,BC028764,NM_026742	mRNA	1918.81	1877.33	1149.12	735.201	498.577	489.295	540.396
IVGNm30637	AK031893,AK122348,AK171300,NM_001039179,NM_001039180,NM_029791	mRNA	1916.63	1934.76	1549.43	1424.74	977.66	737.847	464.505
IVGNm33212	AF036898,AK077592,AK172024,BC052170,BC063772,NM_011133	mRNA	1916.57	1748.51	1224.24	774.988	405.71	334.283	319.218
IVGNm33467	AK004041,AK037538,AK049333,AK088243,AK147967,AK148307,BC019480,NM_026824	mRNA	1916.11	2163.68	1524.31	953.631	499.458	338.859	330.748
IVGNm15310	AK011725,AK012995,AK013038,BC048521,BC138926,BC138927,NM_027263	mRNA	1914.03	2261.91	1666.78	1235.93	663.777	392.983	276.981
IVGNm23286	AF046783,AK013195,AK033360,AK053320,AK088948,AK157741,AK180845,AK217183,BC043047,BC054734,NM_011962	mRNA	1912.92	1980.18	2224.47	2121.3	2312.54	2062.22	1934.94
IVGNm20907	AB028895,AF299345,AK002792,AK003242,AK135616,AK145131,AK169275,AK217133,BC005414,NM_016898	mRNA	1911.58	1893.11	1756.72	1589.22	1389.61	1284.35	1115.05
IVGNm30958	AK134656,AK135007,BC056431,NM_001081493,NM_013732	mRNA	1909.93	2125.68	2099.78	1945.89	1710.1	1150.64	713.794
IVGNm13538	AJ246002,AK007793,AK129282,BC046286,NM_001162870,NM_016962	mRNA	1909.66	2196.97	1791.29	1589.75	1009.14	587.296	323.61
IVGNm28829	AK017316,AK034784,NR_034038	ncRNA	1909.21	1432.64	915.574	878.858	824.649	732.119	523
IVGNm33278	AK077679,AK139610,AK150283,AK150343,AK152525,AK166093,AK168219,AK169214,AK172568,AK184329,AK184862,AK189814,AK194573,BC033264,BC059826,BC083122,M10624,NM_013614,S64539	mRNA	1909.03	2406.09	2006.03	1726.75	1260.52	633.587	272.414
IVGNm15969	AF176527,AK002538,AK012401,AK029989,AK077595,AK078111,AK147748,AK160145,BC034854,NM_015791	mRNA	1907.42	1720.42	1253.34	755.273	400.742	305.931	243.618
IVGNm29835	AF093135,AJ242722,AK009948,AK013036,AK014712,AK020170,AK020448,AK045436,AK076594,BC046301,BC061099,NM_001168240,NM_022986	mRNA	1906.92	2106.5	1365.55	943.522	497.459	247.578	132.464
IVGNm15177	AK006435,AK129015,BC021415,BC031491,NM_001017966,NM_023544	mRNA	1904.96	1768.94	908.302	488.027	262.276	188.948	151.113
IVGNm33584	AK053188,AK122249,AY004877,BC004751,NM_030238	mRNA	1903.34	2030.31	1875.81	1961.7	1726.5	1260.71	526.925
IVGNm11316	AK011175,AK019145,AK078068,BC056393	mRNA,ncRNA	1902.16	1882.29	1618.31	1475.67	1277.54	1046.94	912.146
IVGNm14707	AK002685,AK076286,AK144645,AK166936,AK168582,AK205907,AK207779,BC003777,BC005593,BC028926,BC037623,BC046532,BC086788,NM_011119,U43918,X84789	mRNA	1898.74	2979.63	2818.91	2252.09	1356.69	647.741	357.82
IVGNm00012	AK003200,AK032174,BC065380,BC066093,BC086805,NM_001177773,NM_001177774	mRNA	1897.76	1355.43	426.602	268.577	234.829	233.7	182.926
IVGNm31607	AB060654,AF356006,AK009495,AK021272,AK151365,AK151847,AK152330,AK152823,AK170493,AK180083,AK189647,AK205813,AK206535,AK208636,AK210235,AK211031,AK211051,AK212370,BC009169,BC030393,NM_033617	mRNA	1897.22	2060.44	2039.12	1969.79	2014.92	1602.99	1234.64
IVGNm15299	AK010430,AK128909,AK143507,AK148907,AK149185,AK179172,BC034505,BC060266,NM_026993	mRNA	1895.31	2205.46	1926.41	2059.78	1902.69	1432.79	662.898
IVGNm01392	AK005372,AK078019,AK136689,NM_025898	mRNA	1894.45	1974.47	1669.12	1437.25	1365.89	1085.91	907.782
IVGNm24232	AF027963,AF443192,AK007724,AK145241,AK178083,AK180092,AK187998,AK191275,AK195676,AK201525,AK202632,AK204892,AK206627,AK206863,AK207925,AK209182,AK211765,AK213043,AK216856,AK217319,AK217907,AK218355,AK218387,AK218413,BC008153,BC016079,BC029197,NM_013842	mRNA	1892.93	1843.43	1099.55	521.958	256.116	158.311	130.071
IVGNm31654	AK122258,AK147467,AK161946,AK171262,BC006767,BC065132	mRNA	1892.65	1635.19	991.491	620.15	418.252	384.873	307.62
IVGNm03199	AK028715,AK079857,AK079892,AK136560,NR_015519	ncRNA	1892.28	2768.24	1667.3	1521.4	1519.06	1202.87	1234.43
IVGNm28131	AK037833,AK085101,BC020411,NM_001145804	mRNA	1890.95	2047.31	1765.14	1775.35	1446.05	1415.96	973.723
IVGNm14727	AJ532593,AK002643,AK028563,AK039007,AK050893,AK085776,AK160619,AK166214,BC032929,NM_001083331,NM_172394	mRNA	1890.91	1863.83	1942.94	1368.1	691.294	329.723	237.704
IVGNm28735	AK012956,AK019254,AK147861,AK154368,BC065066,BC079540,NM_080561,NM_207110	mRNA	1890.78	1712.92	990.188	445.538	260.372	212.505	211.152
IVGNm29706	AK032835,AK035697,BC031983,BC099896	mRNA	1890.56	1589.38	941.503	603.003	546.89	491.051	417.175
IVGNm26275	AB018374,AF213454,AK131996,AK146755,BC021626,BC083087,NM_016710	mRNA	1888.87	2131.33	2088.06	1984.9	1819.83	1959.59	1564.73
IVGNm04523	AK011160,AK135658,AK145345,AK156791,AK167141,AK168394,AK184762,AK195449,AK198408,AK219650,BC004086,BC055846,BC057117,NM_028108	mRNA	1886.15	1858.66	1732.87	1115.3	541.756	298.043	200.245
IVGNm30345	AK004183,AK048534,AK049298,AK131766,AK165456,AK172695,AK179463,AK202633,BC010213,BC026847,BC027375,BC028857,BC051098,BC080667,NM_026842,NM_152234	mRNA	1885.99	1961.4	1829.72	1628.76	949.199	460.19	238.163
IVGNm12815	AK011403,AK151910,AK162135,AK164367,BC010792,BC023749,BC158104,NM_027349	mRNA	1884.98	1804.22	1504.15	1029.57	633.202	429.887	395.596
IVGNm06914	AK011570,AK015585,AK032873,AK037831,AK050912,AK083861,AK139689,AK146020,AK146687,AK152732,AK154387,AK159798,BC018523,NM_026403	mRNA	1884.62	2001.12	1547.82	903.786	341.89	137.718	113.734
IVGNm15994	AB028272,AK002290,AK135947,AK146657,AK158530,AK160924,AK164392,AK167718,AK168220,AK168291,BC012962,NM_018808	mRNA	1883.43	1922.93	843.378	309.436	144.329	112.698	105.341
IVGNm33345	AF161587,AK002879,AK011731,BC002126,BC024621,BC029329,BC030350,NM_019749	mRNA	1883.26	1564.36	1654.15	1618.81	1211.52	704.848	360.97
IVGNm05826	AK014849,AK019487,AK042303,AK044858,AK045542,AK162418,BC055734,NM_013886	mRNA	1883.11	1948.07	1747.81	1420.63	820.685	486.543	314.091
IVGNm24588	AK004052,AK080664,AK154104,BC002295,NM_133964	mRNA	1882.83	2168.18	1872.49	1597.97	1166.94	532.616	321.374
IVGNm11654	AK006708,AK012394,AK032369,AK088172,BC056978,BC060064,NM_054070,NR_028260	mRNA	1882.42	1820.98	1493.17	1244.07	956.538	655.039	339.197
IVGNm11786	AB020983,AK087934,AK140078,AK145576,AK145790,AK145967,AK146254,AK146599,AK146756,AK146938,AK178767,AK183467,AK218371,BC012957,NM_001080793,NM_011791	mRNA,ncRNA	1878.26	1957.79	2059.66	1687.31	995.894	550.125	330.558
IVGNm12900	AJ310552,AK003872,AK014442,AK220488,BC026429,BC090630,NM_025695	mRNA	1877.16	1826.2	1563.85	1069.68	606.311	358.003	202.671
IVGNm34457	AK007549,AK007937,AK010957,AK030594,AK153481,BC006057,BC016117,NM_026454	mRNA	1876.61	1908.6	1479.84	1117.09	666.271	339.491	184.946
IVGNm17091	AK003564,AK020614,BC024332,NM_026633	mRNA	1874.64	2015.04	1755.46	1613.86	1139.89	651.91	404.427
IVGNm33217	AF044266,AJ000990,AK148104,AK178161,BC132515,BC132519,NM_011175	mRNA	1872.16	1727.8	2194.81	2085.83	2060.64	2002.62	1783.6
IVGNm28354	AF063231,AK088015,AK141837,AK150173,AK161831,AK164322,AK164437,AK168730,BC139374,BC139375,GU992208,GU992209,GU992210,GU992211,GU992212,NM_001198872,NM_001198873,NM_001198874,NM_001198875,NM_001198876,NM_001198877,NM_001198878,NM_010064	mRNA	1870.1	1836.45	2275.68	2079.94	1555.07	840.914	406.525
IVGNm00922	AK016704,BC120917,BC120918,DQ086115,NM_028937	mRNA	1869.25	1658.94	1570.4	1350.46	1034.98	659.664	674.357
IVGNm21529	AB079133,AK018195,AK039709,AK051443,AK080871,AK135420,AK154123,BC040777,BC079635,BC085158,NM_001025947,NM_152816	mRNA	1868.04	1666.28	1618.79	1470.04	1003.82	851.351	629.287
IVGNm34452	AK005536,AK076166,BC037049	mRNA	1867.99	1798.43	1973.28	1802.04	1786.38	1796.05	1582.33
IVGNm16810	AK029510,AK087939,AK088351,AK129199,AK135937,AK148384,AK157744,AK161128,BC029070,BC090833,CT010322,NM_010771	mRNA	1866.96	3117.51	2905.45	2808.57	1993.99	1329.48	691.785
IVGNm20379	AK012721	mRNA	1866.48	2019.99	1345.69	796.928	297.526	225.785	218.588
IVGNm06165	AK028910,AK033624,AK079184,AK135760,AK167889,AK169005,AK172504,AY065980,BC006911,BC020325,BC022920,BC024885,NM_133941	mRNA	1866.41	1895.62	1226	754.314	346.529	221.254	184.168
IVGNm22359	AB077327,AF459435,AK209361,BC029000,BC049801,NM_001142809,NM_001142810,NM_133987	mRNA	1865.82	1959.64	1651.67	1338.99	1010.46	725.942	506.917
IVGNm11372	AK029472	mRNA	1865.79	1726.01	1352.46	1374.87	935.156	829.895	733.563
IVGNm07389	AK014155,AK129202,BC053449,BC063078,NM_028451	mRNA	1861.47	1830.79	1541.92	1248.71	704.883	423.442	220.175
IVGNm22696	AF006602,AF207748,AK122325,AK139202,AK145972,AK146483,AK155335,AK156008,AK157159,AK161956,BC023309,BC049926,BC058554,BC060609,NM_001077696,NM_010412	mRNA	1859.82	1984.54	1841.42	1599.53	1373.96	859.651	675.463
IVGNm16900	AF213383,AK145549,AK153057,AK183892,BC040783,BC046965,BC063094,BC068282,NM_013854	mRNA	1859.17	1963.5	2232.28	1730.45	985.996	435.02	233.627
IVGNm29111	AK036320,AK081949,AK135624,BC043062,BC056993,NM_001077359,NM_001077360,NM_019834	mRNA	1856.16	1933.43	1522.96	1224.09	839.066	476.751	264.842
IVGNm31235	AB241120,AB241121,AB241122,AF483488,AF483489,AK002777,AK010693,AK019362,AK145400,AK154751,AK168333,AK169186,AK169242,BC004671,NM_008019,X60203	mRNA	1854.36	1916.52	2124.71	2121.22	2086.91	1860.54	1173.17
IVGNm28427	AF064635,AK012103,AK078841,AK081869,AK082715,AK088521,AK150849,AK152489,AK166027,AK167908,AK188070,AK212469,BC010749,BC037620,BC090659,NM_019657	mRNA	1854.26	1781.2	1734.39	1664.12	1467.77	1452.29	1010.05
IVGNm02490	AK038990,BC048903,NM_178662	mRNA	1853.73	1871.56	1323.37	920.074	542.892	393.915	317.762
IVGNm08096	AB049633,AK002509,AK008592,AK054185,AK077857,AK145687,AK169272,BC011128,BC016586,BC034877,NM_053159	mRNA	1853.2	2171.24	1836.3	1429.7	697.099	248.311	135.179
IVGNm32337	AF007817,AK077513,AK085861,AK145968,AK169363,AK189850,AY336976,BC005425,BC014711,NM_011497,U69106,U80932	mRNA	1852.71	1941.49	1192	634.57	247.942	145.711	123.359
IVGNm11670	AK131833	mRNA	1851.28	1930.89	1696.44	1547.86	1139.42	938.342	565.542
IVGNm01844	AF149822,AK088534,AK190470,BC025089,BC086790,NM_009774,U67327	mRNA	1851.03	1939.66	1810.92	1458.79	721.638	248.285	153.381
IVGNm29390	AK011489,AK150036,AK170211,AK171372,BC023674,BC089001,NM_028128	mRNA	1850.71	1845.65	1713.43	1353.29	778.603	430.975	318.621
IVGNm31209	AK018089,BC113195,NM_001081059	mRNA	1850.57	2088.69	1838.45	1561.19	809.176	268.633	152.024
IVGNm13868	AB221638,AF044335,AF044336,AK155307,BC058190,EU071702,L76092,L76150,NM_001040654,NM_009877,S80650	mRNA	1849.02	1605.11	1774.88	1699	1483.95	1182.53	465.609
IVGNm13601	AK049607,AK077559,AK139933,AK151028,AK151710,AK152428,AK152952,AK164020,AK166740,AK169345,AK170221,BC013717,D87691,NM_144866	mRNA	1848.73	1899.86	1807.71	1404.72	707.738	376.825	202.891
IVGNm32575	AK010328,AK050343,BC018422,NM_027175	mRNA	1848.61	1786.66	844.215	317.638	202.701	215.1	243.157
IVGNm01402	AK080247	ncRNA	1848.17	2395.8	1727.29	1828.81	2152.78	1705.71	2598.85
IVGNm32172	AF124385,BC019139,NM_001113188,NM_001113189,NM_008053,X90875	mRNA	1847.92	2171.81	1893.57	1396.51	648.083	319.86	197.92
IVGNm33295	AB027125,AB027237,AB097219,AF177041,AK007716,AK008949,AK220165,BC012643,BC021937,BC063780,NM_013777,NM_013778	mRNA	1847.48	1897.91	1727.88	1462.24	1133.85	777.035	408.667
IVGNm17296	AK135069,AK149674,AK153182,AK153900,AK164901,AK167907,BC021616,BC086766,NM_144870	mRNA	1846.98	1865.08	1756.67	1709.86	1260.79	686.624	260.103
IVGNm12318	AK038934,AK083165,BC052633,NM_010756	mRNA	1846.87	1769.39	1153.99	917.09	676.297	583.096	440.227
IVGNm31609	AB033922,AK004689,AK037487,AK154927,AK211130,AK215022,AK217093,BC018504,NM_013865,NM_180956	mRNA	1845.14	1837.62	1646.39	1527.67	1164.79	783.25	495.148
IVGNm14011	AK155349,AK162430,AK220168,BC018593,BC051991,BC088987,NM_010091,U10115	mRNA	1841.26	1818.97	1676.11	1518.47	1262.92	1052.29	944.68
IVGNm05723	AK002506,BC028514,NM_009943,U08439	mRNA	1840.49	2094.52	1586.15	1706.75	1666.7	1972.23	1937.13
IVGNm02169	AB075549,AK134639,NM_008092	mRNA	1840.34	1891.88	1109.63	590.263	439.044	330.725	277.255
IVGNm33887	AF150101,AK018764,AK165848,AK172179,BC024370,NM_001024853,NM_001024854,NM_013896	mRNA	1840.09	1698.34	1018.25	529.069	227.954	177.943	180.172
IVGNm31566	AF261233,AK028537,AK157173,AK193668,BC043689,NM_001177594,NM_001177595,NM_133221	mRNA	1837.74	2038.32	1585	1311.89	905.412	727.41	455.891
IVGNm33346	AB028861,AK011384,AK011875,AK076032,AK145506,AK145739,AK166872,AY323828,BC023681,BC055729,NM_019795	mRNA	1837.1	1724.35	1773.49	1372.88	901.405	383.341	212.381
IVGNm26499	AB030729,AB221598,AF039957,BC129896,BC129897,NM_019943	mRNA	1836.21	2006.19	1481.37	1233.44	897.941	814.549	685.309
IVGNm20585	AK004206,AK009358,AK013835,AK017732,AK028599,AK158822,BC029256,NM_001122960,NM_026070,NM_027487	mRNA	1834.07	2000.04	1590.79	1408.43	1062.55	559.643	276.738
IVGNm16943	AF099934,AK146739,AK168865,BC022681,NM_019442	mRNA	1830.18	1980.57	1731.12	1507.54	1082.43	574.149	339.339
IVGNm08669	AK037951	mRNA	1829.48	1989.42	1502.21	1284.15	979.569	692.142	515.559
IVGNm24402	AK004388,AK005909,AK010850,AK012388,AK031779,BC005646,NM_026023	mRNA	1829.43	1712.01	1506.47	1302.72	912.055	658.03	409.137
IVGNm31411	AK049226,AK147382,BC026635,NM_001172096,NM_001172097	mRNA	1828.1	1739.36	1125.84	749.061	400.003	299.422	223.795
IVGNm32437	AF049099,AK011111,AK144998,BC145302,BC145309,NM_001163511,NM_021343	mRNA	1826.52	1682.45	718.135	244.032	118.996	81.0823	68.1275
IVGNm34181	AF230339,AK003714,AK005976,AK019152,BC043016,NM_023162	mRNA	1825	1739.82	1217.93	748.808	263.013	108.525	90.3264
IVGNm05128	AF079527,AK146609,AK150461,BC051986,NM_010500	mRNA	1824.28	1142.83	525.86	485.729	470.119	525.864	623.144
IVGNm04886	BC049359	mRNA	1824.04	1723.98	1451.59	1240.34	806.004	365.408	144.444
IVGNm33327	AF004107,AK011130,AK013662,AK152582,BC003752,NM_018740,NR_027884,NR_027977	mRNA	1821.9	1972.2	1631.09	1430.97	908.498	483.523	306.874
IVGNm23501	AK003673,AK017953,AK020149,AK141417,AK151252,AK170345,BC011296,BC025910,BC037019,NM_026365,NR_037974	mRNA	1820.55	1664.03	963.971	518.681	274.285	190.505	190.531
IVGNm01610	AJ222586,AK145934,AK152672,AK190340,BC010459,NM_001130479,NM_016773	mRNA	1819.91	1900.71	1843.98	1668.47	1455.86	1242.07	721.684
IVGNm12804	AK009218,AK012384,AK143423,AX775977,AX775979,BC152942,NM_025507	mRNA	1819.79	1829.96	1506.18	1039.9	596.624	281.675	180.078
IVGNm32490	AK002246,AK003594,AK011917,AK017565,AK158898,BC026537,NM_025314	mRNA	1816.08	2121.29	1787.62	1684.4	1280.29	775.611	310.714
IVGNm20006	AF144101,AK002754,AK005080,AK087390,AK088888,AK139288,AK184184,BC011087,NM_019879	mRNA	1815.54	1890.53	1823.13	1587.34	1145.42	440.143	133.805
IVGNm07146	AK048810,BC024607,BC037666,NM_145938	mRNA	1815.27	1944.29	1212.79	736.545	288.692	142.217	115.712
IVGNm30402	AK011650,AK129234,AK164957,BC050836,BC052192,NM_028493	mRNA	1811.59	1772.89	1560.75	1369.36	938.556	590.842	400.02
IVGNm23436	AK010453,BC026620,BC043325,BC060119,BC060717,BC137856,BC144972,BC144973,NM_023525	mRNA	1811.53	1868.55	1756.01	1623.67	1343.07	809.716	330.627
IVGNm14458	AK004619,AK147150,AK149998,AK150391,AK150501,AK150624,AK152539,AK152646,AK152846,AK153295,AK161221,AK167858,AK215823,AK218088,BC015302,BC094020,D13181,D14850,DQ832702,DQ832703,NM_001002011,NM_001111102,NM_019390,X14170	mRNA	1811.22	2162.76	2055.35	1652.11	874.533	310.466	187.485
IVGNm32474	AK002900,AK009891,AK010050,AK049869,AK192959,AK193641,BC002225,BC027202,NM_024185	mRNA	1808.83	1713.46	1754.14	1491.46	1118.29	878.509	532.1
IVGNm21956	AF184240,AK034130,AK035098,AK047459,AK049173,AK049294,AK081724,AK082683,AK162612,AK163914,AK165188,AK204713,BC030378,NM_001166456,NM_001166458,NM_134086	mRNA	1808.27	1779.93	1801.95	1692.77	1197.46	631.012	329.694
IVGNm20007	AK049771,AK139427	mRNA	1808.15	2947.36	2514.43	2518.76	2246	1433.51	651.552
IVGNm31264	AF177029,AK005923,AK088684,AK133931,BC025435,BC125257,NM_001172073,NM_028209	mRNA	1807.28	1850.31	1133.19	603.608	357.651	347.13	384.587
IVGNm20308	AK004719,AK005723,AK088638,AK150530,AK152685,AK160069,AK168690,BC050902,BC092270,NM_010786	mRNA	1806.73	1686.95	919.157	500.934	289.048	224.521	216.302
IVGNm30006	AK007731,AK090202,AK150287,AK171619,AK172641,AK178028,AK209299,AK211686,AK212689,BC003445,NM_024233	mRNA	1806.23	2018.69	1798.47	1811.39	1493.51	1216.8	782.569
IVGNm33581	AB056151,AF208046,AK041886,AK050368,AK082078,AK167570,AK170542,AK170846,AK178390,AK205588,AK209893,BC010482,BC058744,NM_030215	mRNA	1803.14	1738.08	1652.57	1170.47	607.962	275.758	179.571
IVGNm06683	AF085737,AJ011923,AK134277,AK162016,AK167358,BC050267,BC066855,NM_001044371,NM_011233	mRNA	1802.94	1577.58	1334.9	880.938	525.61	291.184	208.402
IVGNm03541	AK018694,AK076201,AK088878,AK155766,AK156067,BC014754,NM_010822,U10420	mRNA	1801.96	1908.13	1467.95	1075.11	596.765	299.144	257.6
IVGNm25632	AF184973,AK139377,AK156158,AK181865,AY239289,AY239290,AY309459,BC024610,NM_001164564,NM_178444,NM_198724	mRNA	1800.3	2068.41	1835.77	1820.32	1602.2	1339.89	987.245
IVGNm07021	AK002978,AK031073,AK049678,AK078939,AK132235,AK150832,BC071237,NM_029561	mRNA	1798.89	1727.52	1930.73	1862.78	1330.33	1045.15	534.312
IVGNm00776	AK141181,AK161806,NM_009472,U72634	mRNA	1795.79	1558.12	1259.78	898.761	490.488	253.64	153.586
IVGNm22414	AK147078,AK161223,AK161920,AK169425,AM231689,BC023936,BC044720,BC052707,D12645,NM_008443	mRNA	1793.55	2493.37	1981.26	1647.63	1205.02	813.414	516.621
IVGNm20078	AJ276796,AK033328,AK037227,AK047027,AK077558,AK133205,AK135433,AK152866,BC030473,BC054717,BC056194,BC058954,NM_013742	mRNA	1791.57	2587.1	1928.92	1421.63	759.475	399.834	300.529
IVGNm17342	AK075942,AK075961,AY091637,BC056164,NM_153152	mRNA	1791.39	2021.98	1985.06	1998.64	1889.06	1476.92	974.765
IVGNm14010	AF124385,AK049231,AK180674,AK198118,BC019139,NM_001113188,NM_001113189,NM_008053,X90875	mRNA	1788.58	1685.74	1702.95	1112.19	501.142	226.664	140.65
IVGNm16119	AK013503,AK013962,AK135970,BC145731,BC145733,NM_025848	mRNA	1787.52	1724.77	1713.36	1543.32	1263.08	815.276	290.802
IVGNm33150	AF483478,AF483479,AK075995,AK135831,AK135867,AK169812,AK179917,AK183177,AK187203,AK188179,AK188405,AK190793,AK191008,AK192790,AK192964,AK195324,AK195513,AK204268,AK207068,AK218242,BC058686,D87663,NM_009536,Z19599	mRNA	1787.3	1512.07	2032.13	1723.91	1213.03	664.351	231.302
IVGNm01856	AK079930,AK146444,BC013498,NM_007382,U07159	mRNA	1786.75	1759.92	1572.62	1380.81	983.861	648.12	361.016
IVGNm07504	AK042060,AK043733,AK047104,AK049190,AK080379,AK088624,AK150392,AK151194,AK152276,AK152452,AK152799,AK153021,AK153066,AK172991,BC024691,NM_028791	mRNA	1785.51	1882.93	1776.82	1550.8	1187.51	662.057	374.586
IVGNm32848	AK047941,AK083784,AK143821,AK210723,BC062098,BC100390,BC119316,BC119318,NM_175095	mRNA	1785.2	1847.56	1246.2	810.627	285.619	108.357	70.8976
IVGNm03607	AK018176,AK053674,AK078715,AK150535,AK169203,AK169623,BC046773,BC058627,NM_001078167,NM_173374,X66091	mRNA	1784.49	1798.69	1839.55	1391.99	678.56	461.442	316.833
IVGNm31238	AF019889,AF022223,AK009149,AK154469,AK171094,BC003722,BC069918,BC093509,NM_001171739,NM_009736	mRNA	1784.4	2005.76	2031.34	2113.95	2302.08	2298.67	1650.62
IVGNm22330	AB093253,AB288871,AF011908,AK036705,AK076214,AK147239,AK155100,AK197545,AY236858,AY236859,BC042837,BC052323,BC080846,NM_001198785,NM_001198787,NM_007377	mRNA	1784.32	1851.48	1212.51	912.999	605.844	439.879	320.582
IVGNm24058	AK147078,AK169425,BC052707,D12645,NM_008443	mRNA	1784.16	1981.93	1727.32	1338.27	796.489	469.688	316.653
IVGNm05551	AF038538,AF038539,AK144271,AK160500,BC031370,NM_001025364,NM_013648	mRNA	1782.96	1908.77	2095.33	1729.69	1080.45	509.974	346.758
IVGNm34482	AK011465,AK020470,AK078792,AK147490,AK154610,AK158750,AK159972,AK170459,AK192032,AK219139,BC008550,BC023031,BC057192,BC069883,BC075617,NM_023431	mRNA	1775.43	1933.38	1576.99	994.409	627.531	630.231	588.732
[truncated: 32,510 more rows]
