# Supplementary material for: Genome-wide analysis of long noncoding RNA stability
Source: HighWire-hosted journal article supplement (doi:10.1101/gr.131037.111), 2012-03-09
Supplement: Supp_Table_2.xlsx [file Supp_Table_2.xlsx]

## Sheet: V1ncodemouse_probe_annotations_
ProbeID	Accession ID	Classification	Intergenic	Head-Head Partner Accession ID	Tail-Tail Partner Accession ID	Intronic Host Accession ID (Exclusive)	Intronic Host Accession ID (All)	Cis-antisense Partner Accession ID	uaRNA Host Accession ID	Associated Promoter Accession ID	Transcript Size	CDS Size	Intron Size	Genomic Size	Intron Count	Exon Density	CDS Density	Splice Junction Density	PUF Motif Frequency (whole transcript)	PUF Motif Frequency (3'UTR only)	ARE Motif Frequency (whole transcript)	ARE Motif Frequency (3'UTR only)	Major PolyA Signal Frequency	Minor PolyA Signal Frequency	Internal Priming Signal Frequency	UCSC Known Gene ID	RefSeq ID	UniGene Symbol	UniGene Name	PhastCons Score (Total)	PhastCons Score (Mean)	PhyloCSF Score	LincRNA (Guttman 09 and Guttman 10)	Chromatin binding lincRNAs (Guttman 11 + lncRNAdb)	lncRNAdbID	0h	0.5h	2h	4h	8h	16h	32h	HalfLife (min)	Halflife (hr)	RSquared	StandardErrorK	LowerConfidenceIntervalHalfLife (min)	UpperConfidenceIntervalHalfLife (min)	NucCyto log2 Expression
IVGNm00001	AB029142,AB029143,AB029144,AB029145,AB029146,AF013099,AF175574,AK010969,AK145524,AK187289,AK188053,BC009005,BC016433,NM_008951	mRNA		AK007259							2120	1140	8589	9849	9	0.119	0	7.389					1			uc008qhr.1,uc008qhs.1,uc008qht.1,uc008qhu.1,uc008qhv.1	NM_008951	Psmd4	26S proteasome non-ATPase regulatory subunit 4 (26S proteasome regulatory subunit S5A) (Rpn10) (Multiubiquitin chain-binding protein).,proteasome 26S non-ATPase subunit 4	1165.81	0.981	1973.41				2070.28	2106.73	1987.18	1674.32	1135.14	528.821	293.088	490.208	8.17013	0.9847	0.0187013	304.096	1263.48	10.333
IVGNm00002	AB081756,BC116402,BC116403,BC127175,NM_001080816	mRNA									1296	1293	14714	15683	10	0.062	0.633	8.256								uc008qvt.1,uc008qvu.1	NM_001080816	Bclp2	Chitinase like protein 2.,chitinase like	719.055	0.568	390.288																	6.338
IVGNm00003	AB093243,AB221604,AB221605,AF017806,AK034951,AK046236,BC008537,NM_013889	mRNA									9977	8094	69862	79839	7	0.125	0.42	0.702	5		21	2	1	1		uc008sgn.1		Zfp292	Zfp292 protein (Fragment).	8872.02	0.889	3186.05				44.4155	31.041	21.9813	16.0581	17.5532	9.25386	10.4148	64.4689	1.07448	0.940511	0.229427	32.4383	5130.68	6.88
IVGNm00004	AB108673,AB221649,AK131933,AK149358,BC057574,NM_011443,U31967	mRNA									2456	1237	121	2456	2	0.95	0.218	0.881	1	1	4	4	1	1		uc008oxu.1	NM_011443	Sox2	sex-determining region Y-box 2	2248.76	0.995	1212.88																	7.09
IVGNm00005	AF076623,AK009706,AK031207,BC060693,BC062893,NM_016701	mRNA									6126	5595	3365	9359	4	0.4	0.659	1.39	1		3		1			uc008ptm.1,uc008ptn.1	NM_016701	Nes	nestin	1665.6	0.505	1885.78				122.875	133.125	140.664	108.869	89.1091	41.5338	38.6072	547.666	9.12777	0.917695	0.0427708	213.617	-971.418	9.432
IVGNm00006	AF363737,AK049569,AK145623,BC037135,BC085287,BC131942,BC132615,NM_173763	mRNA									2246	1365	41589	43831	14	0.039	0.561	7.821			6	1		1		uc008roz.1,uc008rpa.1	NM_173763	Ccbl2	cysteine conjugate-beta lyase 2	1277.89	0.804	943.865																	9.361
IVGNm00007	AF534879,BC028528,NM_153513	mRNA									733	444	7246	7979	5	0.067	0.602	8.547			1		1	2		uc008qln.1,uc008qlo.1	NM_153513	BC028528	hypothetical protein LOC229600	247.868	0.463	59.6969				100.899	81.5921	88.6959	63.8424	56.1435	33.5368	34.918	294.568	4.90947	0.936538	0.0540075	142.851	-4745.89	8.176
IVGNm00008	AJ223472,AK002319,AK007437,BC010807,D00926,D83387,NM_011542	mRNA									1243	1041	25696	26939	10	0.041	0.538	9.05					3	3		uc008vhv.1	NM_011542	Tcea3	3,transcription elongation factor A (SII)	1033.09	0.875	1388.37				174.516	175.426	169.421	129.991	107.036	61.6384	50.5958	409.557	6.82595	0.979964	0.0236243	248.83	1156.72	8.557
IVGNm00009	AK002733,BC044770,BC046436	ncRNA									1426		28123	28949	4	0.029	0	2.805	1		2		1	1		uc008rnc.1,uc008rne.1		AK002733,BC046436	RIKEN full-length enriched library, clone:0610031O16 product:unclassifiable, full insert sequence.,Mus musculus adult male kidney cDNA	40.986	0.037																		6.284
IVGNm00010	AF025653,AF034568,AK002922,AK142016,AK150497,AK151463,AK160007,AK160706,AK169305,BC031526,BC043657,NM_011884	mRNA		AK038279							4153	1791	188208	192300	16	0.008	0.431	8.212	1		8	1	1	1		uc008sfv.1	NM_011884	Rngtt	RNA guanylyltransferase and 5'-phosphatase	2925.47	0.948	1013.49				178.847	129.812	151.469	101.755	60.2619	23.67	21.7373	295.045	4.91742	0.93821	0.0531772	144.105	-6220.11	7.248
IVGNm00011	AF095936,AK003052,AK003533,AK009660,AK153045,AK169252,AK169839,AK190493,AK196072,BC013509,BC018580,BC051934,DQ403000,NM_023374	mRNA									1073	849	16849	17922	7	0.052	0.718	10.283			2	1	1	1		uc008vnl.1	NM_023374	Sdhb	iron, subunit B,succinate dehydrogenase complex	794.614	0.967	1787.23				14270.9	15802.2	13218.8	13513.4	9359.83	5865.37	2103.37	709.379	11.823	0.972619	0.022239	345.501	-13336.5	13.022
IVGNm00012	AK003200,AK032174,BC065380,BC066093,BC086805,NM_001177773,NM_001177774	mRNA		AK212440				AK147159	NM_080428		4164	2130	159458	163622	13	0.025	0	3.122			4	2	1			uc008pqn.1		BC086805,Fbxw7	RIKEN full-length enriched library, archipelago homolog (Drosophila)], clone:1110001A17 product:F-box and WD-40 domain protein 7, full insert sequence.,Mus musculus 18-day embryo whole body cDNA	3713.21	0.938	1937.43				1897.76	1355.43	426.602	268.577	234.829	233.7	182.926	45.6373	0.760622	0.996509	0.0796714	36.7232	60.2661	5.785
IVGNm00013	AK003276,AY112699,NM_027315	mRNA		AK048101				X51976	AY112699		3069	1266	7308	10377	12	0.296	0	3.913			2	1	1	1		uc008qad.1	NM_027315	Ube2q1	ubiquitin-conjugating enzyme E2Q	2042.57	0.666	877.88				904.799	904.953	510.14	301.865	197.04	153.384	146.518	110.008	1.83347	0.983411	0.0663709	73.9583	214.621	7.98
IVGNm00014	AB059656,AF397007,AF397008,AK003599,AK158764,AK194955,AK197183,AK197614,AK197720,AK199370,AK204234,AK204759,AY035898,AY035899,BC046642,BC068308,NM_001029836,NM_033525	mRNA							BC046642		3813	1827	63928	67597	13	0.05	0	3.409			4		1		5	uc008rkc.1,uc008rkd.1,uc008rke.1,uc008rkf.1	NM_001029836,NM_033525	Npnt	nephronectin isoform a,nephronectin isoform b	1931.42	0.568	1308.49																	7.954
IVGNm00015	AK003731	ncRNA	TRUE								1043			1043		1	0				3		1							37.618	0.036		TRUE																7.183
IVGNm00016	AK003775	ncRNA									1133			1133		1	0		2		4		1							540.771	0.477					87.9123	52.6944	54.011	26.6589	21.6645	11.4901	16.6042	113.169	1.88615	0.905465	0.160407	51.1639	-534.089	6.242
IVGNm00017	AK003807,NM_008412	mRNA							NM_008574		1902	1855	912	2814	1	0.676	0.975	0.526					1	1		uc008qef.1	NM_008412	Ivl	involucrin	93.694	0.121	715.683																	8.422
IVGNm00018	AF285091,AK004027,AK052367,AK143522,BC056975,EU797522,NM_133187	mRNA		AK132613					EU797522		3980	1572	53722	57702	3	0.061	0	0.867	1		10	1	1	1		uc008pny.1	NM_133187	1110032E23Rik	hypothetical protein LOC68659	1189.68	0.331	899.622				27.0978	21.444	24.8093	15.723	15.0898	7.2561	10.0049	266.197	4.43662	0.878695	0.0835786	107.109	-548.533	8.531
IVGNm00019	AK004070,AY027660,NM_133698	mRNA						AK144002	NM_133698		10658	9702	3166	13824	3	0.771	0	0.281			4		2					Hrnr		461.507	0.043	-1033.18																	5.929
IVGNm00020	AK004088,AK078823,BC019548,BC023199,NM_145542	mRNA							AK087454		3851	1590	29578	33429	16	0.115	0	4.155			3		1	1		uc008qxi.1,uc008qxj.1	NM_145542	Ahcyl1	S-adenosylhomocysteine hydrolase-like 1	3084.05	0.801	982.915				3768.66	3602.04	3608.62	3386.53	2306.37	1553.87	894.413	654.995	10.9166	0.976122	0.0209449	341.88	7784.64	9.494
IVGNm00021	AK004282,AK079384,AK192264,BC018493,NM_027495	mRNA							BC018493		2292	1047	27218	29510	11	0.077	0.455	5			6		1		2	uc008pnw.1,uc008pnx.1	NM_027495	Tmem144	hypothetical protein LOC70652	830.313	0.376	747.202				91.8762	74.0865	86.8706	73.63	79.9758	62.1713	73.3826
IVGNm00022	AK004282	mRNA							BC018493		871			871		1	0						1							42.975	0.049	-290.265				44.5186	33.5364	41.7256	31.9346	35.366	22.5458	32.8177							5.217
IVGNm00023	AK004292,AK147920,BC026821,BC052162,NM_008467	mRNA							BC026821		3726	1566	51146	54872	16	0.064	0.439	4.544	1		5	1	1			uc008pme.1	NM_008467	Kpna4	karyopherin alpha 4	3643.01	1.002	517.981				162.187	120.71	141.537	94.672	44.1265	21.231	23.583	265.878	4.43131	0.928772	0.0623553	126.2	-2489.51	10.041
IVGNm00024	AK004346,AK028678,AK028914,NM_001081326	mRNA						AK138965	AK036225		9625	4596	58543	68168	33	0.141	0.333	3.429	2		11		1	1		uc008rcq.1	NM_001081326	Agl	6-glucosidase,amylo-1	4973.16	0.517	3135.48																	7.324
IVGNm00025	AF117608,AF266467,AK004367,AK033734,AK042767,AK052947,BC006027,BC029099,BC037696,NM_019971	mRNA							NM_019971		3571	1038	174104	177616	6	0.015	0	1.862			3	3	1	3		uc008poj.1,uc008pok.1	NM_019971	Pdgfc	C polypeptide, complete cds.,Mus musculus fallotein mRNA,platelet-derived growth factor	2174.28	0.681	1503.06				53.958	37.8288	39.9476	19.8225	12.741	6.23455	8.49035	166.063	2.76771	0.93741	0.0881736	83.9755	7384.8	6.11
IVGNm00026	AK004418	ncRNA				AK079194,BC158045,NM_080451	NM_080451				1181			1181		1	0				2		1							403.572	0.342	-384.869				183.757	146.951	97.9472	38.3579	27.2006	19.9003	25.2604	93.5658	1.55943	0.990848	0.0581496	68.6356	146.937	11.319
IVGNm00027	AK004536,AK047941,AK083784,AK089100,AK143821,BC062098,BC080774,BC100390,BC119316,BC119318,NM_175095	mRNA									4116	600	4650	8768	6	0.162	0	4.237			11		1	1	3	uc008phd.1,uc008phe.1	NM_175095	Commd2	RIKEN full-length enriched library, clone:C130022P08 product:MY004 PROTEIN homolog [Homo sapiens], full insert sequence.,COMM domain containing 2,Mus musculus 16 days embryo head cDNA	943.523	0.625	932.297				1968.98	2567.83	1328.18	952.087	303.388	130.091	90.8764	173.34	2.889	0.927448	0.0916998	84.0984	-2834.36	7.788
IVGNm00028	AF040094,AK004601,AK004722,AY007563,BC028864,NM_008385	mRNA		BC044760	AK029821						3834	2982	55853	59634	24	0.059	0.646	6.26	2	1	2	2		1		uc008uqy.1,uc008uqz.1	NM_008385	Inpp5b	75 kDa, RIKEN full-length enriched library, clone:1200004L23 product:inositol polyphosphate-5-phosphatase, full insert sequence.,Adult male lung cDNA,inositol polyphosphate-5-phosphatase B	2607.17	0.721	2248.26				392.237	406.202	397.053	284.001	148.974	80.6257	64.7315	323.817	5.39695	0.957695	0.0405975	172.461	2646.19	10.448
IVGNm00029	AK004863,NR_033581	mRNA									2789	324	11382	14171	3	0.197	0.116	1.076	1	1	5			2		uc008rni.1		Adh6-ps1	RIKEN full-length enriched library, clone:1300002P07 product:similar to ALCOHOL DEHYDROGENASE 2 (EC 1.1.1.1).,Adult male liver cDNA	258.529	0.093	98.0211																	5.561
IVGNm00030	AK005156	ncRNA				NM_027808	NM_027808				2394			2394		1	0				4		1	2						118.697	0.05	-78.6389																	5.373
IVGNm00031	AK005184,AK005310,AM162549,BC025614,BC037182,BC052543,BC058279,NM_025902	mRNA							AK005301		3353	405	14153	17512	2	0.136	0.182	0.899	2	1	1		1	2		uc008rlk.1	NM_025902	Cisd2	CDGSH iron sulfur domain 2	876.471	0.298	909.506				515.999	441.933	448.064	377.529	271.55	195.333	134.136	401.697	6.69495	0.980583	0.0235215	246.323	1087.95	7.261
IVGNm00032	AK005412,NM_001163567	mRNA							NM_001163567		5702	1110	50909	56611	10	0.101	0	1.754			6	1	1					Fam102b		1768.8	0.31	636.996				330.624	268.446	281.022	219.449	148.005	91.3499	67.389	337.552	5.62587	0.970696	0.0325711	194.669	1268.91	7.858
IVGNm00033	AK005488	ncRNA							BC100519		889			890		1	0						1							195.303	0.22																		6.094
IVGNm00034	AK005586,AM040460,NM_029289	mRNA									509	360		509		1	0						1	1				Cypt12																					6.081
IVGNm00035	AK005639,BC100480	mRNA									672		7268	7872	5	0.077	0	8.278						2		uc008rft.1,uc008rfu.1		AK005639,BC100480	RIKEN full-length enriched library, clone:1700003H04 product:hypothetical PH domain-like structure containing protein, full insert sequence.,Mus musculus adult male testis cDNA	27.024	0.045	6.3703																	5.434
IVGNm00036	AK005707,AK017083	ncRNA	TRUE	AK019551				AK158543			1642		20459	22101	5	0.074	0	3.045			2			1		uc008pho.1		AK005707	RIKEN full-length enriched library, clone:1700007F19 product:unclassifiable, full insert sequence.,Mus musculus adult male testis cDNA	541.527	0.33																		6.061
IVGNm00037	AK005745,AK161314,BC048437,NM_011598,U96149	mRNA									585	426	14361	14744	4	0.026	0.65	10.444			1	1	1			uc008opj.1	NM_011598	Fabp9	testis,fatty acid binding protein 9	275.105	0.608	336.116																	7.147
IVGNm00038	AK005828	ncRNA	TRUE								435		29149	29584	3	0.015	0	6.897					1			uc008oom.1		AK005828	RIKEN full-length enriched library, clone:1700010I02 product:unclassifiable, full insert sequence.,Mus musculus adult male testis cDNA	6.38	0.015																		5.237
IVGNm00039	AK005839	ncRNA		NM_011967							224		7851	8075	1	0.028	0	4.464					1			uc008qyp.1		AK005839	RIKEN full-length enriched library, clone:1700010K24 product:unclassifiable, full insert sequence.,Mus musculus adult male testis cDNA	2.647	0.012																		5.149
IVGNm00040	AK005845	mRNA		NM_001078646							574	396		574		1	0.69				1									23.223	0.04	-216.132																	5.095
IVGNm00041	AK005899	ncRNA				AK034804,BC058387,BC131987,BC132317,NM_011372,Y11342	NM_011372				577		1569	2146	1	0.269	0	1.733						3						196.215	0.34	-287.279				137.192	88.4573	69.1685	54.8519	49.0962	33.1243	33.3184	61.8297	1.03049	0.929511	0.263426	29.6212	-707.875	5.81
IVGNm00042	AK005920	ncRNA		AK132576		AB010140,AK052749,AK082471,AK083422,AK162663,BC030038,NM_008596	AK082471				395			395		1	0							1						162.939	0.413																		5.838
IVGNm00043	AK005945	ncRNA		BC138236							1006		1680	2686	1	0.375	0	0.994			1		1							154.596	0.154	-276.874																	6.668
IVGNm00044	AK005987	ncRNA				AK034804,BC058387,BC131987,BC132317,NM_011372,Y11342	NM_011372				213		8134	8347	1	0.026	0	4.695					1	1		uc008rtx.1		AK005987	RIKEN full-length enriched library, clone:1700015C17 product:unclassifiable, full insert sequence.,Mus musculus adult male testis cDNA	23.49	0.11																		5.009
IVGNm00045	AK006042	ncRNA		AK045721				AK129151			563		1097	1660	1	0.339	0	1.776			1		1	1						288.142	0.512																		6.649
IVGNm00046	AK006064	mRNA									2419	323	15609	18029	5	0.134	0.134	2.067	1		3	1								460.538	0.19	-241.273																	5.239
IVGNm00047	AK006417	ncRNA						AK143547			583		22143	22726	3	0.026	0	5.146	1											154.1	0.264																		5.82
IVGNm00048	AK006465,NR_036591	ncRNA	TRUE								469		18284	18753	4	0.025	0	8.547					1			uc008ppk.1		1700028M03Rik,AK006465	RIKEN full-length enriched library, clone:1700028M03 product:unclassifiable, full insert sequence.,Mus musculus adult male testis cDNA	112.981	0.241	-3.1709																	6.132
IVGNm00049	AK006483	ncRNA	TRUE								497			497		1	0													48.589	0.098																		5.298
IVGNm00050	AK006559	ncRNA	TRUE								985		13095	14080	4	0.07	0	4.061			2									46.885	0.048	-29.272																	9.451
IVGNm00051	AK006601,AK161371,NM_028499	mRNA									1234	1044	171199	172433	8	0.007	0.844	6.483			4		1	1		uc008sba.1,uc008sbb.1	NM_028499	1700034K16Rik	hypothetical protein LOC73314	586.627	0.479	-62.6424																	6.122
IVGNm00052	AK006624	ncRNA						AK032529			1129			1130		1	0						1							69.273	0.061	-149.947																	5.736
IVGNm00053	AK006691,AK030060	mRNA	TRUE								3120		23	3143	1	0.993	0	0.321			5		1	1						392.222	0.218	51.7599																	6.1
IVGNm00054	AK006698	ncRNA		AK166791							593		26132	26725	3	0.022	0	5.059					1	1						80.704	0.136	-75.8017																	6.186
IVGNm00055	AK006795,AK006978,AK015364,NR_015596	ncRNA		AK029764						AK006269,AK014879,AK029752,AK029764,AK139789,AK145332,NM_001146001,NM_001163496,NM_001163497	2224		194	2245	1	0.914	0	0.488			5					uc008qoh.1		4930442L01Rik,AK006978	RIKEN full-length enriched library, clone:1700082E09 product:RIKEN cDNA 4930442L01 gene, full insert sequence.,Mus musculus adult male testis cDNA	156.929	0.075	-305.591
IVGNm00056	AK006854,NR_038029	mRNA									1962	383	15282	17244	8	0.114	0.195	4.077					2	1				1700061I17Rik		106.33	0.054	-45.004																	5.62
IVGNm00057	AK006795,AK006978,AK015364,NR_015596	ncRNA		AK029764						AK006269,AK014879,AK029752,AK029764,AK139789,AK145332,NM_001146001,NM_001163496,NM_001163497	2224		194	2245	1	0.914	0	0.488			5					uc008qoh.1		4930442L01Rik,AK006978	RIKEN full-length enriched library, clone:1700082E09 product:RIKEN cDNA 4930442L01 gene, full insert sequence.,Mus musculus adult male testis cDNA	156.929	0.075	-305.591																	6.158
IVGNm00058	AK007071	ncRNA							NM_011372		675		19413	20088	3	0.034	0	4.444			1									37.008	0.055	24.1687				43.323	37.1053	45.5665	35.9599	37.6028	26.4999	18.2854	1591.73	26.5289	0.873701	0.0447436	276.602	-423.943	5.496
IVGNm00059	AK007260	ncRNA	TRUE								568		289204	289772	4	0.002	0	7.042						1		uc008ryu.1		AK007260	RIKEN full-length enriched library, clone:1700123O12 product:unclassifiable, full insert sequence.,Mus musculus adult male testis cDNA	40.683	0.072	-18.6153																	5.921
IVGNm00060	AK007279	ncRNA	TRUE	NM_001177626							860		2133	2994	2	0.288	0	2.326			2		1							50.327	0.059	3.7998																	7.519
IVGNm00061	AK007385	ncRNA							X02580.1		835			835		1	0				2		2							46.702	0.056																		6.661
IVGNm00062	AK007433,AK007788,AK008280,AK089948,AK148146,AK166332,AK167301,AK167321,BC061065,NM_026435	mRNA									3199	255	5565	8766	5	0.124	0	6.369	1		10	1	1	3		uc008pfa.1	NM_026435	Ufm1	ubiquitin-fold modifier 1	413.942	0.394	224.198				140.198	145.272	126.235	88.4471	69.6579	47.2362	53.9473	215.373	3.58954	0.970544	0.0469337	128.594	662.317	7.005
IVGNm00063	AK007509	mRNA		AK020406							400		2059	2459	2	0.163	0	5					1							136.826	0.342																		5.861
IVGNm00064	AK007899	ncRNA		AK019076				AK172955			471		9157	9628	1	0.049	0	2.123					1	1		uc008vjp.1		AK007899	RIKEN full-length enriched library, clone:1810058N05 product:unclassifiable, full insert sequence.,Mus musculus 10 day old male pancreas cDNA	46.108	0.098	-205.977																	5.688
IVGNm00065	AK007915,AK136240	mRNA							AF157598		2379	1011	7427	9806	2	0.243	0	0.841	1		4	1		2						1862.22	0.783	937.67																	5.973
IVGNm00066	AK007933	mRNA		AK152185							907	390	5452	6359	2	0.143	0.43	2.205	1	1			1	1						80.543	0.089	-91.2406				49.5238	43.0809	46.1846	28.4472	31.5713	15.1732	30.2576	179.482	2.99137	0.744358	0.186054	55.5788	-146	6.254
IVGNm00067	AK008051	ncRNA		NM_001159354						AF213258,AK030083,BC156417,NM_001159354,NM_133853	1199			1199		1	0				2		1	1						126.427	0.105	-212.007																	5.868
IVGNm00068	AK008262	ncRNA		AK136278		AK089967,AK145681,AK146481,BC090650,BC098478,BC141035,NM_175389	AK089967	AK048857		AK089967,AK136278,AK145681,AK146481,BC090650,BC098478,BC141035,NM_001163457,NM_175389	294			294		1	0								9					8.528	0.029	-159.979				175.345	102.223	73.0576	63.5426	84.1545	68.0106	105.242	14.53	0.242166	0.875173	1.57611	5.7457	-27.475	11.537
IVGNm00069	AK008359,AK008425	mRNA									661	237	24726	25111	3	0.015	0.359	7.792												496.373	0.751	674.531
IVGNm00070	AK008369,BC025067,NR_028574	ncRNA		AK132686	BC031429				AK015768		785		249	785	1	0.676	0	1.923					2	2		uc008rfn.1		BC025067,Snhg8	with apparent retained intron.,Mus musculus cDNA clone IMAGE:4036503	158.235	0.202					178.927	21.0458	6.39766	5.25884	3.72638	4.52305	6.71853	8.65928	0.144321	0.999752	0.172585	7.87372	9.61896	5.847
IVGNm00071	AK008379	ncRNA	TRUE								514		3137	3651	1	0.141	0	1.946					1	1						263.395	0.512	-222.66																	6.148
IVGNm00072	AK008231,AK008375,AK008482	ncRNA									394		9484	9878	1	0.04	0	2.538								uc008qga.1		AK008482	RIKEN full-length enriched library, clone:2010013F14 product:RAR-related orphan receptor gamma, full insert sequence.,Mus musculus adult male small intestine cDNA	207.509	0.527																		6.618
IVGNm00073	AK008733	ncRNA				AK030650	AK030650				1374			1374		1	0				4		1							157.411	0.115	-97.01																	5.411
IVGNm00074	AK008781	ncRNA						NM_001113188	BC024335		1093			1095		1	0				3		2	1						75.573	0.069	-6.0503				64.4244	53.5458	62.5868	47.0578	53.7805	33.5019	31.9031	616.053	10.2675	0.804252	0.0674053	163.314	-347.62	7.979
IVGNm00075	AK008823	ncRNA	TRUE								751		588	1339	1	0.561	0	1.332						1						26.935	0.036																		8.179
IVGNm00076	AK007191,AK008852	ncRNA	TRUE		AK032042						1088		5243	6223	2	0.157	0	2.041			1		1	2		uc008pue.1,uc008puf.1		AK007191,AK008852	RIKEN full-length enriched library, clone:1700113A16 product:unclassifiable, full insert sequence.,Mus musculus adult male testis cDNA	455.206	0.459	-14.7494				66.0191	60.4307	60.1218	40.8401	31.816	18.4899	21.6939	250.864	4.18107	0.964411	0.0453883	142.525	1045.89	5.954
IVGNm00077	AK008921	ncRNA	TRUE								867		5729	6596	3	0.131	0	3.46			3		1			uc008rwj.1		AK008921	RIKEN full-length enriched library, clone:2210414B05 product:unclassifiable, full insert sequence.,Mus musculus adult male stomach cDNA	19.45	0.022																		6.263
IVGNm00078	AK008987,AK134433	ncRNA							EU797522		1459			1462		1	0		1		9		1	1						53.07	0.036	-98.7346																	5.237
IVGNm00079	AK009169,AK017534,AK049667	ncRNA		AK187884						AK013288,AK084372,AK134241,AK161063,AK161974,AK163729,AK173272,BC043695,NM_001038696,NM_026043	1431			1431		1	0				1		1			uc008rbi.1		AK017534	RIKEN full-length enriched library, clone:2310005E23 product:unclassifiable, full insert sequence.,Mus musculus adult male tongue cDNA	180.886	0.209	-40.8584				62.1832	48.0827	24.7815	15.0618	26.1623	21.4461	39.6277	32.4167	0.540279	0.791959	0.975122	10.4224	-29.1968	12.372
IVGNm00080	AK009192,AK019569,BC107021,NM_025506	mRNA									968	357	7979	8609	6	0.055	0.285	9.554			3	1	1			uc008qgk.1	NM_025506	2310007A19Rik	hypothetical protein LOC66353	322.761	0.524	305.188				291.773	336.991	294.68	290.829	282.4	280.9	256.64							7.072
IVGNm00081	AK009442,AK144979,AK167411,AK220517,BC021630,BC023253,NM_008857	mRNA							AK220517		4486	1785	52505	56991	17	0.076	0	3.932	1		12	1	2	1		uc008ovs.1	NM_008857	Prkci	iota,protein kinase C	2243.88	0.51	2385.65				379.271	297.096	347.136	283.778	181.49	99.0975	54.7571	482.75	8.04583	0.945611	0.0362497	222.644	-2869.08	5.193
IVGNm00082	AK009590	ncRNA						X51976	AK159448		166			166		1	0						1	1						22.49	0.135					1470.47	1457.73	1360.02	1302.03	1040.97	886.053	471.889	1151.83	19.1971	0.990118	0.01198	599.532	14618.7	11.622
IVGNm00083	AK003290,AK009907	ncRNA	TRUE								1795			1795		1	0				3		1	1						608.134	0.541																		5.999
IVGNm00084	AF365876,AK004017,AK009973,AK010117,BC022628,NM_001164210,NM_133675	mRNA									1785	1564	38604	40358	3	0.022	0.418	2.278			4	2	2	1		uc008pmm.1,uc008pmn.1	NM_133675	1110032A04Rik	hypothetical protein LOC66183	814.992	0.464	430.236																	5.062
IVGNm00085	AK009760,AK010144,BC003309,NM_024246	mRNA			AK002728,AK217646						2428	1173	3444	5781	3	0.365	0.483	1.518					1	1		uc008puq.1,uc008pur.1	NM_024246	Tmem79	hypothetical protein LOC71913	861.521	0.436	2224.12				33.6409	27.4902	26.6174	19.4006	22.473	11.4899	17.6234							10.707
IVGNm00086	AK009415,AK009579,AK010225,NM_009100	mRNA						AK144002			4146	3354	1598	5744	2	0.722	0	0.482					2			uc008qfh.1	NM_009100	Rptn	repetin	586.716	0.18																		5.814
IVGNm00087	AK010897	ncRNA			AK016273			BC049572	AK029837		473		1556	2029	1	0.233	0	2.114					1	1		uc008rtz.1		AK010897	RIKEN full-length enriched library, clone:2510003D18 product:unclassifiable, full insert sequence.,Mus musculus 13 days embryo liver cDNA	119.902	0.253																		5.82
IVGNm00088	AK005111,AK010915,AK016715,AK050648,AK171961,BC024696,BC025081,NM_029748	mRNA		AK149955	NM_001195730						1519	423	6412	7822	6	0.106	0.162	5.51			3		1		4	uc008uxo.1,uc008uxp.1,uc008uxq.1	NM_029748	2510006D16Rik	RIKEN full-length enriched library, clone:1500002D11 product:weakly similar to PP1065 [Homo sapiens], full insert sequence.,Mus musculus adult male cerebellum cDNA,hypothetical protein LOC76799	442.012	0.51	359.683				2688.28	2825.5	2468.79	2442.02	1964.73	1546.95	1236.43	544.595	9.07659	0.981569	0.0196158	317.887	1898.67	12.438
IVGNm00089	AF047704,AK011078,AK132488,AK171705,BC019213,NM_011656	mRNA		AK039813					AK206798		2564	1170	43559	46048	12	0.054	0.44	4.71	1		3		1	1		uc008qgt.1,uc008qgu.1	NM_011656	Tuft1	tuftelin 1	1164.7	0.457	1033.35				702.731	721.399	460.359	271.039	147.977	110.506	110.573	136.389	2.27315	0.984073	0.0524174	92.3248	260.918	9.808
IVGNm00090	AK011425,AK032806,AK146034,AK167778,AK168090,AK170598,BC055369,NM_172685	mRNA		AK053531					AK168090		3424	1434	41878	45302	9	0.075	0	2.662			11		1	1		uc008rae.1	NM_172685	Slc25a24	calcium-binding transporter	1526.36	0.448	1161.74				476.173	378.957	401.041	334.494	226.912	157.461	91.6833	412.037	6.86729	0.964399	0.0316308	220.331	3171.49	7.556
IVGNm00091	AK011675	ncRNA							BC050193		744			744		1	0		1				1							151.963	0.204	-410.111				46.8822	32.0017	39.586	22.3591	16.0648	6.04105	8.55569	239.598	3.9933	0.897972	0.0827974	103.08	-738.635	5.686
IVGNm00092	AK011787,AK163433,NR_033490	ncRNA	TRUE								1363		8788	10151	2	0.089	0	2.331	1		4		2	2		uc008orj.1		2610100L16Rik,AK163433	RIKEN full-length enriched library, clone:2610100L16 product:hypothetical protein, full insert sequence.,Mus musculus 10 days embryo whole body cDNA	365.136	0.378																		6.225
IVGNm00093	AK012273,AK034783,AK083941,AK085187,BC087731,NM_173181	mRNA							NM_173181		3361	972	47062	50423	8	0.064	0	2.49	2		9		1	2		uc008oog.1	NM_173181	3110050N22Rik	hypothetical protein LOC67306	1237.55	0.371	565.397				86.3781	61.61	63.6121	36.5967	19.6689	9.06887	13.7697	180.394	3.00656	0.948558	0.0735896	95.6368	1585.72	8.28
IVGNm00094	AK012506	ncRNA									778		42218	42996	2	0.018	0	2.571					1			uc008onz.1		AK012506	RIKEN full-length enriched library, clone:2700069I18 product:unclassifiable, full insert sequence.,Mus musculus 11 days embryo whole body cDNA	166.98	0.215					62.6233	59.2072	60.8106	45.9741	40.3811	26.8235	32.1227	276.922	4.61537	0.933579	0.0581094	133.503	-3728.22	7.609
IVGNm00095	AK012510,AK135141,BC090999,NM_001013024	mRNA									4686	2577	112949	117632	20	0.04	0	4.271			3		1	1		uc008owr.1,uc008ows.1	NM_001013024	Usp13	ubiquitin specific protease 13 (isopeptidase	2918.78	0.623	1650.55
IVGNm00096	AK012857	mRNA							AK129151		2461			2461		1	0				2					uc008qri.1		AK012857	11 days embryo whole body cDNA, RIKEN full-length enriched library, clone:2810035F16 product:RIKEN cDNA 2810035F16 gene, full insert sequence.,Mus musculus 10	586.916	0.238	-190.027				736.568	666.422	439.113	294.106	181.922	112.214	81.6553	141.826	2.36376	0.99687	0.0222228	117.172	179.619	9.176
IVGNm00097	AK012857,AK019524,AK052454,AK082772	mRNA							AK129151		3748	744	7598	11349	3	0.331	0	0.8			2	1		1		uc008qri.1		AK012857	11 days embryo whole body cDNA, RIKEN full-length enriched library, clone:2810035F16 product:RIKEN cDNA 2810035F16 gene, full insert sequence.,Mus musculus 10	1689.57	0.451	1570				1050.02	1108.34	692.145	568.403	379.276	226.717	125.707	202.035	3.36725	0.972328	0.0481022	122.535	575.253
IVGNm00098	AK002818,AK003236,AK012912,AK076235,AK088555,AK150255,BC011111,NM_026155	mRNA							AK192841		2918	558	10012	12931	4	0.223	0.193	1.394			7		1	1		uc008pkn.1	NM_026155	Ssr3	gamma,signal sequence receptor	996.032	0.347	547.9				1713.72	1672.52	1630.78	1627.89	1312.69	1380.43	1020.9	1193.81	19.8968	0.907089	0.0382367	294.958	-583.09	7.392
IVGNm00099	AK005053,AK013016,AK136442,AK187627,BC006710,NM_001161774,NM_009176,X84234	mRNA									2549	1125	200580	202762	11	0.006	0.44	8.943			1		1			uc008ujk.1,uc008ujl.1,uc008ujm.1	NM_009176	St3gal3	sialyltransferase 6	1680.19	0.991	1322.71				69.5538	63.841	67.7556	48.514	42.216	27.6858	28.9306	307.647	5.12745	0.944165	0.048799	153.651	-136671	9.558
IVGNm00100	AK004742,AK013083,AK168539,AK169340,BC038303,BC043045,BC083123,NM_025822	mRNA							AK168539		3232	1014	369683	372732	9	0.008	0	2.839			4		1	1		uc008plh.1,uc008pli.1,uc008plj.1	NM_025822	Rsrc1	RIKEN full-length enriched library, clone:I920030H18 product:similar to BM-011 homolog.,17 days embryo heart cDNA,arginine/serine-rich coiled-coil 1	1133.94	0.351	1332.55				95.3976	83.7592	129.89	105.062	88.9524	57.8314	42.5625							5.338
IVGNm00101	AK013659	ncRNA	TRUE	AK145993						AK009402,AK079299,AK082783,AK144184,AK145993,AK167233,AK208595,AK213606,BC021451,BC051067,NM_028840	1075			1075		1	0				2		1	1	6					16.333	0.015					32.4061	17.2338	20.601	14.7854	22.1422	9.23554	16.207							11.656
IVGNm00102	AK013673,AK147442,BC056343,NM_019972	mRNA									6854	2574	70625	77380	20	0.087	0	2.918	2		5		1	1		uc008qyr.1,uc008qys.1	NM_019972	Sort1	sortilin 1	3543.58	0.7	2645.42				1939.2	1890.27	1691.4	1506.21	1148.27	902.625	465.686	543.425	9.05708	0.993213	0.0118444	380.097	952.873	7.254
IVGNm00103	AK013807	ncRNA	TRUE								777			777		1	0				7			1	5					116.315	0.15																		5.268
IVGNm00104	AK013824	ncRNA				AB028840,AB030836,AK034387,AK038434,AK042683,BC055737,NM_012028	AK034387	AK168666			984			985		1	0													40.931	0.042	-34.3885																	9.482
IVGNm00105	AK013842	ncRNA							X81203		393			393		1	0				1			1						25.322	0.064																		5.402
IVGNm00106	AK014086,AK078928,BC089354,NM_175193	mRNA							AK149286		4232	2049	76300	80448	15	0.052	0	3.544	2	1	7	2	1	2		uc008pnf.1,uc008png.1	NM_175193	Golim4	golgi integral membrane protein 4	2134.32	0.504	1894.28				705.132	593.961	567.131	411.177	251.873	145.007	102.046	269.508	4.4918	0.986929	0.0256279	184.455	500.109	6.163
IVGNm00107	AK014131	mRNA		BC062909						AK154521,AY007702,BC062909,NM_001122759	2072			2076		1	0				4									190.991	0.092	72.203	TRUE																9.698
IVGNm00108	AK014146	ncRNA				AK122433,BC098461,NM_001163387,NM_138666	AK122433				1205			1206		1	0				3									62.577	0.052	-11.5451																	14.026
IVGNm00109	AK014239	ncRNA				AB060081,AK053807,NM_001081277	AK053807				844			844		1	0				1									234.617	0.278																		5.105
IVGNm00110	AK014267	ncRNA				AB553633,AK173269,BC085318,NM_001004176	AB553633				995			995		1	0				1				7					41.296	0.042					47.51	32.7031	37.9256	22.1218	19.1124	11.4295	11.0467	209.961	3.49935	0.898214	0.0927518	91.2838	-699.66	13.437
IVGNm00111	AK014334	ncRNA				AJ299430,AK009983,AK011504,AK142299,AK142720,BC004640,BC014727,NM_001168281,NM_133784	NM_001168281				1987			1989		1	0				5									197.094	0.099	-37.2411																	6.6
IVGNm00112	AK014451	ncRNA	TRUE								1178			1179		1	0				1		1	1								27.2949																	7.79
IVGNm00113	AK014550	ncRNA				AF068244,BC092229,BC137668,BC140959,NM_009814,U91483	AF068244				2882			2882		1	0				3				9					320.116	0.111	1.485																	7.2
IVGNm00114	AK014580,BC037267,NR_027985	mRNA									4114			4114		1	0				9		1	1				4632415L05Rik		801.72	0.345	153.564				59.8646	35.8039	30.9349	17.2195	20.3329	16.2955	25.4818	27.4957	0.458262	0.904514	0.714793	11.8922	-88.1069	10.613
IVGNm00115	AK014609	ncRNA				AK004660,AK144060,AK153298,AK198431,BC009119,BC054446,NM_008991	BC054446				1071			1073		1	0				3				3					180.065	0.168																		6.145
IVGNm00116	AK014666	ncRNA	TRUE								2120			2121		1	0				5		1							35.268	0.017	1.9293																	6.065
IVGNm00117	AK014853,AK054449	ncRNA		AK132132							3928			3928		1	0				9		1	1						469.456	0.198	3.1099				284.698	247.97	240.613	211.73	157.961	117.294	71.6617	458.827	7.64712	0.986719	0.0179916	295.808	1022.12	9.046
IVGNm00118	AK014864	ncRNA	TRUE								1461		39532	40995	2	0.036	0	1.369			1		1	1						78.849	0.054																		6.414
IVGNm00119	AK015105	ncRNA	TRUE		AK155438						656		10659	11315	2	0.058	0	3.049			1					uc008qqt.1		AK015105	RIKEN full-length enriched library, clone:4930406D18 product:unclassifiable, full insert sequence.,Mus musculus adult male testis cDNA	18.826	0.029					53.7305	52.1005	52.517	41.4246	39.8042	25.6719	27.0422	373.002	6.2167	0.941876	0.0435057	179.039	-4475.01	6.105
IVGNm00120	AK015112	ncRNA		AK015371							1436		389	1825	1	0.787	0	0.696			3		1	2						106.866	0.074																		7.305
IVGNm00122	AK015203	ncRNA	TRUE								1418		14032	15450	3	0.092	0	2.116			2		2	3		uc008rno.1		AK015203	RIKEN full-length enriched library, clone:4930425O10 product:unclassifiable, full insert sequence.,Mus musculus adult male testis cDNA	157.724	0.111	10.7207																	6.028
IVGNm00123	AK015268	ncRNA							AK036517		579			579		1	0				2			1						39.36	0.068																		5.13
IVGNm00124	AK015298	ncRNA	TRUE								644		11547	12191	3	0.053	0	4.658			1		1	1						96.551	0.15	-138.092																	5.923
IVGNm00125	AK015371,BC147589,BC147621,BC172107,NM_029054	mRNA		AK015112							1673	1422	34566	36219	9	0.042	0.672	5.852	1		4		1	1		uc008rad.1		4930443G12Rik	RIKEN full-length enriched library, clone:4930443G12 product:weakly similar to PEROXISOMAL CA-DEPENDENT SOLUTE CARRIER.,Adult male testis cDNA	724.844	0.445	153.9																	6.199
IVGNm00126	AK015378,AK161442	mRNA		AK004953							3261	2255	35901	39162	3	0.083	0.669	1.368			4		1	1		uc008ppc.1		AK015378	RIKEN full-length enriched library, clone:4930444E23 product:unclassifiable, full insert sequence.,Mus musculus adult male testis cDNA	221.992	0.11	-72.0701																	7.373
IVGNm00127	AK015409	ncRNA						AF541937			1156		5734	6890	3	0.168	0	2.595					1			uc008rev.1		AK015409	RIKEN full-length enriched library, clone:4930447N08 product:unclassifiable, full insert sequence.,Mus musculus adult male testis cDNA	144.542	0.125	-29.2039				29.0222	14.3653	15.7999	8.12521	9.729	3.45986	4.70088	79.9415	1.33236	0.813286	0.343635	28.2088	-95.8616	7.798
IVGNm00128	AK015465	ncRNA		AK172663							1341		14799	16140	2	0.083	0	1.491			2		1	1						244.454	0.182	13.1322																	6.352
IVGNm00129	AK015502	mRNA						AK046385			643		32802	33445	4	0.019	0	6.221												170.755	0.266	60.5546																	5.555
IVGNm00130	AK015579	ncRNA	TRUE								621		244	865	1	0.718	0	1.61			2		1	1						103.548	0.167																		5.695
IVGNm00131	AK015605	mRNA		BC056943					NM_175356		1082		363	1446	1	0.749	0	0.924					1							181.102	0.167	71.8351				25.8242	18.3137	18.2568	7.68991	11.1699	9.45072	12.1387	66.4601	1.10767	0.831327	0.396996	24.0675	-87.2857	5.567
IVGNm00132	AK015610	ncRNA	TRUE								828		3338	4166	2	0.199	0	2.415			2		1	1		uc008rtv.1		AK015610	RIKEN full-length enriched library, clone:4930482G09 product:unclassifiable, full insert sequence.,Mus musculus adult male testis cDNA	37.764	0.046																		6.285
IVGNm00133	AK015651,NM_001162865	mRNA									1297	1266	11955	13251	4	0.082	0.859	3.756			1					uc008swf.1		AK015651,Cylc2	RIKEN full-length enriched library, clone:4930488P18 product:hypothetical Lysine-rich region containing protein, full insert sequence.,Mus musculus adult male testis cDNA	243.457	0.227	134.688																	9.205
IVGNm00134	AK015676	ncRNA	TRUE								948			948		1	0				2		1							99.348	0.105	-14.3592																	6.452
IVGNm00135	AK015685,BC048658,NM_029144	mRNA						AK139061			1271	705	4045	5316	1	0.2	0.536	0.986			2	1		1		uc008rrr.1	NM_029144	4930503B20Rik	RIKEN cDNA 4930503B20	616.853	0.485	-212.5																	5.317
IVGNm00136	AK015731	ncRNA						AK052409			844			844		1	0													48.804	0.058	34.697																	10.657
IVGNm00137	AK015736	ncRNA				AK036116,AK155089,AK158022,AK173030,BC094228,BC138422,NM_001025067	AK173030				1205			1215		1	0				2									150.057	0.125																		6.676
IVGNm00138	AK015762	mRNA									687		39480	40167	5	0.017	0	7.278					1			uc008qdl.1		AK015762	RIKEN full-length enriched library, clone:1700012F11 product:hypothetical protein, full insert sequence.,Mus musculus adult male testis cDNA	63.977	0.093	-12.8216																	5.187
IVGNm00140	AK015941,BC023801,NM_027927	mRNA		BC061240					NM_027927		2985	1386	16048	19033	6	0.157	0	2.01	2		7	1	1			uc008rkj.1	NM_027927	Ints12	integrator complex subunit 12	1196.41	0.401	1352.2				59.5156	38.5385	18.1529	5.5023	6.06557	4.40792	8.71387	48.6959	0.811598	0.990435	0.123152	34.7739	81.208	9.981
IVGNm00141	AK015945	ncRNA		BC051965						AB221679,AF209854,AK088686,BC051965,BC057336,BC075717,BC118948,BC118949,NM_017395	623			623		1	0				1		2	3						221.847	0.356																		6.245
IVGNm00142	AK015985	ncRNA								AK041594,AK141586	1683			1683		1	0				3									1020.69	0.606																		6.511
IVGNm00143	AK015989,NR_015460	mRNA									757		14444	15201	3	0.05	0	3.963			1		1	1				1700003H04Rik		7.57	0.01	46.1118																	5.688
IVGNm00144	AK015999,NR_030689	ncRNA	TRUE	AK153111,AK167138	AK047963						1406		1946	2443	2	0.203	0	4.024	1		3		1			uc008rlm.1		4930539J05Rik,AK015999	RIKEN full-length enriched library, clone:4930539J05 product:unclassifiable, full insert sequence.,Mus musculus adult male testis cDNA	164.654	0.331	-7.2034	TRUE			25.0261	21.61	28.1534	22.3508	27.0092	18.9183	30.4406							6.4
IVGNm00145	AK016002	ncRNA	TRUE								843		8265	9108	2	0.093	0	2.372						1		uc008oox.1		AK016002	RIKEN full-length enriched library, clone:4930539M17 product:unclassifiable, full insert sequence.,Mus musculus adult male testis cDNA	50.709	0.06	-107.112																	6.875
IVGNm00146	AK016071	ncRNA	TRUE								561		69069	69630	2	0.008	0	3.565					1			uc008sek.1		AK016071	RIKEN full-length enriched library, clone:4930548K13 product:unclassifiable, full insert sequence.,Mus musculus adult male testis cDNA	5.99	0.011																		4.924
IVGNm00147	AK016126	ncRNA	TRUE								556		745	1301	1	0.427	0	1.799			1									15.34	0.028																		6.207
IVGNm00148	AK016143	ncRNA	TRUE								891		190258	191149	6	0.005	0	6.734			2		1							268.905	0.302																		5.939
IVGNm00149	AK016162	ncRNA						AF170303			1250		16180	17430	6	0.072	0	4.8								uc008qtk.1		AK016162	RIKEN full-length enriched library, clone:4930557G23 product:homeodomain interacting protein kinase 1, full insert sequence.,Mus musculus adult male testis cDNA	696.881	0.558	22.1082																	5.551
IVGNm00150	AK016218	mRNA									737	314	11226	11963	4	0.062	0.426	5.427			1	1		2						105.363	0.143	-511.581																	8.992
IVGNm00151	AK016219	ncRNA						AK132726	NM_011342		601			601		1	0						1	1						207.874	0.346					294.169	226.393	253.758	218.308	204.303	181.096	159.926	336.323	5.60538	0.824248	0.0867881	114.061	-354.536	9.092
IVGNm00152	AK016226	ncRNA	TRUE								1112		29434	30546	3	0.036	0	2.698					1	1						76.335	0.069	-7.2175																	5.716
IVGNm00153	AK016239	mRNA						AK147253			1198	910		1199		1	0.76				3									201.397	0.168	-225.201																	5.669
IVGNm00154	AK016265	ncRNA		NM_001039094							1045		13949	14994	3	0.07	0	2.871					2	1		uc008ruy.1		AK016265	RIKEN full-length enriched library, clone:4930570G19 product:unclassifiable, full insert sequence.,Mus musculus adult male testis cDNA	77.79	0.074																		6.253
IVGNm00155	AK016297,AK017883,AK086057	mRNA						BC092057			1623	1155		1623		1	0						2	2		uc008pdu.1		AK017883	RIKEN full-length enriched library, clone:4930577N17 product:inferred: RIKEN cDNA 4930577N17 gene, full insert sequence.,Mus musculus adult male testis cDNA	941.733	0.604	143.422				28.8604	20.2157	23.6077	11.0502	12.4665	10.7247	18.8242							7.054
IVGNm00156	AK016304	mRNA					NM_001174169				523		1207	1730	1	0.302	0	1.912					1	1						154.688	0.296	-170.623
IVGNm00157	AK016304	mRNA					NM_001174169				523		1207	1730	1	0.302	0	1.912					1	1						154.688	0.296	-170.623																	6.687
IVGNm00158	AK016318,BC150693,NM_001163385,NM_001163386	mRNA									1715	975	20981	22635	7	0.067	0.363	4.679			1	1	1	1		uc008rnb.1		4930579F01Rik,AK016318	RIKEN full-length enriched library, clone:1700021A16 product:hypothetical protein, full insert sequence.,Mus musculus adult male testis cDNA	428.69	0.259	40.5796																	12.056
IVGNm00159	AK016381	ncRNA	TRUE								825		536	1362	1	0.606	0	1.212	2		1		1							7.362	0.009	-423.658				33.8665	24.4416	29.6672	21.0727	21.4676	12.2203	16.5934	251.291	4.18818	0.776973	0.126408	80.5256	-224.24	7.158
IVGNm00160	AK016393	ncRNA	TRUE								629		275	904	2	0.696	0	3.18					1			uc008paw.1		AK016393	RIKEN full-length enriched library, clone:4930594O21 product:unclassifiable, full insert sequence.,Mus musculus adult male testis cDNA	21.428	0.034	-48.8842																	6.656
IVGNm00161	AK016407	mRNA									910	699		911		1	0.768				1	1	1							16.693	0.018	-29.1033																	5.962
IVGNm00162	AK016418	ncRNA						AK146387			1003			1003		1	0		1		1		1							72.201	0.072																		6.68
IVGNm00163	AK016424	ncRNA							FJ387503		1755		3168	4926	2	0.357	0	1.14							6					310.344	0.177	-25.533	TRUE																5.988
IVGNm00164	AK016464	mRNA		X84311							972		27788	28761	7	0.034	0	7.202												116.088	0.119	53.3239																	8.944
IVGNm00165	AK016513,AK161073	mRNA		AK163347					AK170145		2430		18498	20928	3	0.054	0	3.937	2		5		1	6		uc008pkp.1,uc008pkq.1		AK016513,AK161073	RIKEN full-length enriched library, clone:4931440P22 product:unclassifiable, full insert sequence.,Mus musculus adult male testis cDNA	641.691	0.264	89.2728																	15.409
IVGNm00166	AK016589	mRNA									1041	590	23698	24740	4	0.042	0.567	3.842			1									22.089	0.021	-175.766																	4.999
IVGNm00167	AK016602	ncRNA						AK014895			1202		5367	6569	3	0.183	0	2.496			3		1	2						70.505	0.059	3.8156																	9.045
IVGNm00168	AK016661,AK045097	ncRNA		NM_024461					BC096383		1390		57997	59387	6	0.018	0	6.51			1		1		9	uc008rew.1		AK016661	RIKEN full-length enriched library, clone:4933405D12 product:unclassifiable, full insert sequence.,Mus musculus adult male testis cDNA	71.215	0.051
IVGNm00169	AK016736	mRNA								AF474247,AK139789,AK145332,BC013512,NM_001163496,NM_001163497	2198			2199		1	0				2			1						191.342	0.087	-74.3709																	8.795
IVGNm00170	AK016740	ncRNA	TRUE								1454			1454		1	0				1									253.536	0.174																		6.785
IVGNm00171	AK016844	ncRNA						NM_030595			1137			1137		1	0				1		1	1						358.123	0.315	41.0529				84.1383	92.1775	86.0509	64.0195	54.1476	21.2978	15.1427	484.236	8.07061	0.962303	0.0298712	246.348	14100.1	7.42
IVGNm00172	AK016894	ncRNA	TRUE					AK039527			2017			2017		1	0				8		1	1						193.669	0.096	-79.0657																	9.368
IVGNm00173	AK016922	ncRNA	TRUE	AK032049						AK029059,AK030588,AK147159,BC119772,BC121823,NM_177130	1544			1544		1	0						1	3						134.348	0.087																		8.596
IVGNm00174	AK016955	ncRNA							AK050048		1378		16031	17409	2	0.079	0	1.451			2		1							90.032	0.065	43.3911																	6
IVGNm00175	AK016981	mRNA		BC067202							975	427		976		1	0.438						1							171.208	0.176	55.7034																	5.863
IVGNm00176	AK017179,AK137645,NM_001161763,NM_001161765	mRNA									5285	1599	21282	26484	8	0.196	0	1.538			4		1	2				Fmo5		1659.21	0.319	1725.97																	5.5
IVGNm00177	AK017223	ncRNA							AK016659		1250			1250		1	0				7		1							636.677	0.509					261.179	205.054	182.702	103.972	65.5646	29.8878	28.5379	176.535	2.94225	0.981604	0.0441308	116.134	367.855	7.001
IVGNm00178	AK008415,AK017252,AK046697,AK155399,BC050932,BC055449,NM_026198	mRNA							BC050932		2775	366	3178	5959	2	0.442	0.08	0.796			2		1	1		uc008qzf.1,uc008qzg.1	NM_026198	2010200O16Rik	RIKEN full-length enriched library, clone:2010200O16 product:PROTEIN X 013 homolog [Homo sapiens], full insert sequence.,Mus musculus adult male small intestine cDNA,hypothetical protein LOC67495	1230.55	0.445	376.512				67.251	61.715	65.0449	47.6326	35.9318	25.0006	24.7846	300.957	5.01595	0.957054	0.0432269	161.069	2288.69	9.218
IVGNm00179	AK017252	mRNA							BC050932		1438			1438		1	0				1		1	1						318.561	0.222	-71.6942
IVGNm00180	AK017326	ncRNA				AB553633	AB553633				1790			1799		1	0				2									277.435	0.155					57.1502	57.2255	56.8141	53.0787	49.9635	24.8489	20.3194	979.875	16.3312	0.926261	0.0345402	300.623	-778.002	7.718
IVGNm00181	AK017386	ncRNA	TRUE								542			542		1	0				2		2							36.531	0.067																		5.484
IVGNm00182	AK017391	ncRNA	TRUE								1257		3712	4969	2	0.253	0	1.591			1		2	1						154.708	0.123	-14.6317																	4.631
IVGNm00183	AK017446	ncRNA							AK015888		1608			1611		1	0		1		9				4					190.014	0.118	-42.3903																	5.355
IVGNm00184	AK017534,AK049667	ncRNA		AK187884						AK013288,AK084372,AK134241,AK161063,AK161974,AK163729,AK173272,BC043695,NM_001038696,NM_026043	1431			1431		1	0				1					uc008rbi.1		AK017534	RIKEN full-length enriched library, clone:2310005E23 product:unclassifiable, full insert sequence.,Mus musculus adult male tongue cDNA	180.886	0.126	-40.8584																	6.48
IVGNm00185	AF237622,AF510858,AK017653,AK078042,BC030167,BC050017,NM_053089	mRNA							NM_053089		4010	2598	53880	57890	19	0.069	0	4.738	1		7		1			uc008pdz.1	NM_053089	Narg1	NMDA receptor-regulated gene 1	3983.41	1.001	1130.34				554.374	504.332	400.099	208.392	120.584	94.1468	79.7815	149.854	2.49756	0.987604	0.0421377	105.416	259.062	4.961
IVGNm00186	AK016297,AK017883,AK086057	mRNA						BC092057			1623	1155		1623		1	0						2	2		uc008pdu.1		AK017883	RIKEN full-length enriched library, clone:4930577N17 product:inferred: RIKEN cDNA 4930577N17 gene, full insert sequence.,Mus musculus adult male testis cDNA	941.733	0.604	143.422
IVGNm00187	AK017932	ncRNA	TRUE								1384			1384		1	0		1		1		1	2						13.347	0.01																		9.538
IVGNm00188	AK017976	ncRNA	TRUE								1379			1379		1	0				1		2	2						174.425	0.126	-58.178																	5.331
IVGNm00189	AK018038,AK029296,BC051212	mRNA		AK083328				BC057543		AK042137,AK083328,AK169530,BC038305	3065			3065		1	0		1		1		1	1		uc008rjh.1		BC051212	RIKEN full-length enriched library, clone:5830467E13 product:inferred: lymphoid enhancer binding factor 1, full insert sequence.,Mus musculus adult male thymus cDNA	1451.41	0.474	90.8564				52.4171	45.1005	27.895	14.6	16.2714	12.9239	18.3988	69.1452	1.15242	0.975396	0.13386	42.7374	180.966	6.465
IVGNm00190	AK018041	ncRNA	TRUE	AK033249							1228			1228		1	0				4		1	1						183.127	0.149																		5.964
IVGNm00191	AK018043	ncRNA				AK039176,AK053736,AK078922,AK137245,BC022932,BC042627,BC052631,BC057158,BC067040,BC067042,NM_001145919,NM_172677,NR_027375	NM_001145919				1440			1446		1	0		1		6			1						119.07	0.083
IVGNm00192	AK018133,NR_028126	mRNA									1843	441		1843		1	0		1	1	3			1				6330407A03Rik		118.501	0.065																		5.27
IVGNm00193	AK018156	mRNA	TRUE								1566		474831	476397	2	0.003	0	1.277	1							uc008vpy.1		AK018156	RIKEN full-length enriched library, clone:6330411D24 product:unclassifiable, full insert sequence.,Mus musculus adult male medulla oblongata cDNA	338.155	0.216	91.7282																	6.018
IVGNm00194	AK018164,AK039740,AK053528,AK151886,AK164801	mRNA,ncRNA			AK078608				U03279		3732			3735		1	0		1		8		1	1		uc008owe.1		AK018164	RIKEN full-length enriched library, clone:6330412C24 product:unclassifiable, full insert sequence.,Mus musculus adult male medulla oblongata cDNA	1239.74	0.553	-9.0057				280.491	234.121	207.534	140.292	101.686	49.1158	40.5759	225.902	3.76504	0.988252	0.0281724	158.542	392.785	7.854
IVGNm00195	AK018278	ncRNA							BC138668		1176			1176		1	0		1		3		1							156.293	0.133																		5.273
IVGNm00196	AK018401,NM_027808	mRNA					NM_027808				4795	3693	105423	110218	13	0.044	0	2.711			3	1				uc008rhk.1		Alpk1,mKIAA1527	RIKEN full-length enriched library, clone:8430410J10 product:LYMPHOCYTE ALPHA-KINASE homolog [Homo sapiens], full insert sequence.,Mus musculus 16 days embryo lung cDNA	1732.74	0.361	1793.08																	6.596
IVGNm00197	AK018434	ncRNA							AK155638		737			738		1	0		1		1									102.614	0.139																		5.416
IVGNm00198	AK018558,AK149452	mRNA,ncRNA					NM_001161742,NM_001161744				4843		657	4843	1	0.734	0	0.551	1		9				9					47.222	0.026																		14.026
IVGNm00199	AK018621,NM_027843	mRNA									1200	576		1200		1	0.439				1			1				Arl14		436.148	0.364	1153.71																	4.937
IVGNm00200	AK018659,AK034835	ncRNA			AK032111						2447			2449		1	0		1		1		1	2						156.964	0.069	8.6224
IVGNm00201	AK019072,NM_001166172	mRNA									791	414	785	1576	2	0.443	0.523	2.528			1		1			uc008qeh.1		AK019072,Lce6a	RIKEN full-length enriched library, clone:2210420J11 product:unclassifiable, full insert sequence.,Mus musculus adult male stomach cDNA	69.137	0.099	-126.931																	5.431
IVGNm00202	AK019103	ncRNA	TRUE								643		5628	6271	2	0.103	0	3.11					1	1						167.471	0.26		TRUE																5.586
IVGNm00203	AK019118	ncRNA		AK020982							590		14597	15187	3	0.039	0	5.085					1							34.091	0.058	-28.8805																	6.429
IVGNm00204	AK019424,BC050760,BC065065,NM_018800	mRNA									4416	1533	55634	59899	7	0.071	0	1.599			4	1	1	1		uc008qsz.1,uc008qta.1,uc008qtc.1	NM_018800	Syt6	Syt6 protein.,synaptotagmin 6	2114.94	0.888	2982.84				8802.88	7594.76	7148.12	5862.43	3735.58	2462.39	1623.41	318.056	5.30094	0.989586	0.0200793	222.986	554.441	14.198
IVGNm00205	AK012857,AK019524,AK052454,AK082772	mRNA							AK129151		3748	744	7598	11349	3	0.331	0	0.8			2	1		1		uc008qri.1		AK012857	11 days embryo whole body cDNA, RIKEN full-length enriched library, clone:2810035F16 product:RIKEN cDNA 2810035F16 gene, full insert sequence.,Mus musculus 10	1689.57	0.451	1570				1193.45	1238.45	804.224	643.215	424.923	246.058	144.166	206.018	3.43363	0.980216	0.0398093	133.127	455.31
IVGNm00206	AK012857,AK019524	mRNA							AK129151		2461			2461		1	0				2			1		uc008qri.1		AK012857	11 days embryo whole body cDNA, RIKEN full-length enriched library, clone:2810035F16 product:RIKEN cDNA 2810035F16 gene, full insert sequence.,Mus musculus 10	586.916	0.254	-190.027				962.02	962.715	576.035	382.925	226.486	143.455	92.2899	141.936	2.3656	0.986585	0.0462139	98.7104	252.512
IVGNm00207	AK019551	ncRNA	TRUE	AK017083							1665		2020	3685	1	0.452	0	0.601			2									292.411	0.176	-0.3488																	5.153
IVGNm00208	AK019631	ncRNA	TRUE								274		10469	10743	1	0.026	0	3.65			1					uc008vpq.1		AK019631	RIKEN full-length enriched library, clone:4930455G09 product:unclassifiable, full insert sequence.,Mus musculus adult male testis cDNA	11.136	0.041																		6.581
IVGNm00209	AK019678	ncRNA								AK004779,AK135865,AK158838,AK169626,BC118047,D88315,NM_008246	415			415		1	0				1		1	1						31.386	0.076																		9.323
IVGNm00210	AK019716	ncRNA	TRUE								344		415	759	1	0.453	0	2.907						1						33.948	0.099																		8.215
IVGNm00211	AK019752,NM_029937	mRNA			NR_033727						5681	5643	102205	107886	39	0.041	0.987	6.865	1		2					uc008qbk.1		AK019752,Nup210l	RIKEN full-length enriched library, clone:4930548O11 product:hypothetical protein, full insert sequence.,Mus musculus adult male testis cDNA	4873.88	0.858	2858.72
IVGNm00212	AK019767	ncRNA	TRUE								402		1937	2339	1	0.172	0	2.488			3		1							17.112	0.043																		5.156
IVGNm00213	AK019768	ncRNA	TRUE								1105			1106		1	0				1		1							148.169	0.134	-27.2486																	7.362
IVGNm00214	AK019908	ncRNA	TRUE								1027			1027		1	0				1		1	1						264.728	0.258																		15.285
IVGNm00215	AK019984	ncRNA	TRUE								2018		8011	10029	2	0.201	0	0.991			6					uc008ryr.1		AK019984	RIKEN full-length enriched library, clone:5730591J02 product:unclassifiable, full insert sequence.,Mus musculus 8 days embryo whole body cDNA	410.121	0.203	-60.0728				72.6512	69.2876	66.2216	53.046	50.4002	24.2508	29.0534	366.532	6.10887	0.940552	0.0445386	175.388	-4080.1	6.338
IVGNm00216	AK020028,AK080646	ncRNA						AK143547			1522		20	1544	1	0.987	0	0.657			4		2	1						121.54	0.084	-117.729																	5.946
IVGNm00217	AK020111	ncRNA				AK028246,AK034819,AK083328,AK131979,AK158769,BC038305,BC057543,NM_010703,X58636	BC057543				1124			1124		1	0				1			1	2					55.614	0.049	5.3583																	4.874
IVGNm00218	AK020122	ncRNA				NM_030595,Y18276.1	NM_030595				789			789		1	0				4				9					16.663	0.021																		5.114
IVGNm00219	AK020124	mRNA						AK133685	AK165084		801			802		1	0		2											94.48	0.118	25.9689				80.3486	69.313	80.3867	64.0876	60.7842	29.529	23.8797	721.327	12.0221	0.916466	0.0393258	249.271	-807.083	6.581
IVGNm00220	AK020168	ncRNA				AK050971,AK078519,AK145275,AK161904,BC030447,BC082557,NM_001005509	AK145275			AB041655,AK002653,AK032680,AK050508,AK075776,AK144732,AK148485,AK149786,AK150005,AK150025,AK150368,AK150428,AK150659,AK150714,AK150770,AK150809,AK151323,AK151384,AK151456,AK151669,AK152373,AK152383,AK152583,AK152636,AK152806,AK152882,AK152996,AK153056,AK153118,AK153138,AK153286,AK153415,AK153456,AK159271,AK161595,AK166004,AK166052,AK167482,AK167952,AK168046,AK168569,AK168734,AK168754,AK168947,AK1…	1190			1192		1	0		1		9			1						75.41	0.063																		5.264
IVGNm00221	AK020241	ncRNA				AK075573,AK144933,AK162693,AK167289,BC027770,D50464,NM_001113478,NM_009146	NM_001113478				1253			1253		1	0				3				2					137.636	0.11	-7.0799																	6.321
IVGNm00222	AK020251	ncRNA		AK038965				AF188507			1093			1093		1	0				2				9					344.936	0.316																		9.433
IVGNm00223	AK020330	ncRNA	TRUE								992			992		1	0				2			1	6					86.49	0.087	11.2055	TRUE																8.651
IVGNm00224	AK020347	ncRNA						AK038780			350		1700	2050	1	0.171	0	2.857					1	1						6.609	0.019	-142.36																	7.023
IVGNm00225	AK020350,AK122485,NM_175515	mRNA									6353	2826	62621	68974	15	0.092	0	2.362			11	2	1	1		uc008pbh.1	NM_175515	Intu	PDZ domain containing 6	2489.5	0.392	1873.8				65.7893	42.7262	45.3352	28.4825	27.1239	16.6795	24.1238	116.566	1.94276	0.864556	0.190678	46.9298	-240.925	6.397
IVGNm00226	AK020406	ncRNA		BC150160							956		8246	9202	3	0.104	0	3.138					1	1		uc008qis.1		AK020406	RIKEN full-length enriched library, clone:9430006E19 product:hypothetical protein, full insert sequence.,Mus musculus 12 days embryo embryonic body between diaphragm region and neck cDNA	232.743	0.243																		6.13
IVGNm00227	AK020412	ncRNA				AB093234,AF155819,AF155820,AK043874,AK147831,AK164993,AK199211,BC021354,BC050903,BC064783,BC133685,NM_001111053,NM_001195538,NM_019978	AK147831				1002			1002		1	0						1	2	5					65.59	0.065																		6.172
IVGNm00228	AK020429,AK036902,AK042964,NM_027462	mRNA									4388	1080	74726	79114	6	0.044	0	1.736			6	2				uc008qqk.1	NM_027462	Wars2	mitochondrial tryptophanyl tRNA synthetase 2	1108.8	0.307	2291.21																	6.111
IVGNm00229	AK020443	ncRNA							AK153100		594			594		1	0				3		1							411.32	0.692					478.542	473.484	425.366	383.708	304.584	241.434	178.115	430.945	7.18242	0.997738	0.0076387	353.302	552.326	6.731
IVGNm00230	AK020497	ncRNA							NM_007917		977		299	1276	1	0.766	0	1.024			1		1	1						92.066	0.094	-122.282																	6.014
IVGNm00231	AK020529	ncRNA				AF187731,AF188506,AF188507,AK052148,AK085208,NM_001077687,NM_001077688,NM_030695	AK052148				1018			1018		1	0				4									120.444	0.118																		5.431
IVGNm00232	AK020567	ncRNA				AJ414610,AK037348,AK087339,AK166208,AK166296,BC132533,BC145123,BC145124,NM_001165954,NM_001165955,NM_001165956,NM_153421	NM_001165954				310			310		1	0													33.143	0.107																		4.881
IVGNm00233	AK020663,AK046337,AK082270,AK141197,BC019388,BC038306,NM_010559,X51975,X53802	mRNA		AK054125							3343	1380	40499	43839	9	0.058	0.542	3.587			2	1	1		1	uc008qaf.1,uc008qag.1	NM_010559	Il6ra	alpha,interleukin 6 receptor	505.522	0.172	513.638																	6.175
IVGNm00234	AK020664	ncRNA				AF213258,AK030083,BC156417,NM_001159354,NM_133853	NM_001159354				1066			1068		1	0		1		8		1	1						230.644	0.216																		12.038
IVGNm00235	AK020735	mRNA					AK143683			AK034490,AK040071,AK049470,AK143683,AK165930,AK166103,BC044664,BC098219,NM_177662	703			703		1	0								2					62.758	0.089																		6.766
IVGNm00236	AK020793,AK044583	ncRNA	TRUE								1581		30161	31527	4	0.043	0	2.53	1		2		1	1		uc008oqu.1		AK020793	RIKEN full-length enriched library, clone:A930001A20 product:unclassifiable, full insert sequence.,Mus musculus adult retina cDNA	97.895	0.062																		7.601
IVGNm00237	AK020856	ncRNA	TRUE								330			330		1	0						1							1.688	0.005																		5.581
IVGNm00238	AK020901	ncRNA	TRUE								1108			1108		1	0				1		1	1						94.089	0.085	-69.5698	TRUE																5.955
IVGNm00239	AK020934	ncRNA				AK032060,AK036018,AK044634,AK082352,BC059251,NM_178655	AK036018				1045			1045		1	0				2									57.894	0.055	-59.2325																	9.125
IVGNm00240	AK020978	ncRNA				AK008493,AK048210,AK084881,AK088600,AK147765,AK162563,AK165916,AK166237,BC016240,NM_028097	AK048210				1144			1144		1	0				12				8					60.261	0.053																		9.737
IVGNm00241	AK020992	ncRNA				NM_030595,Y18276.1	NM_030595				905			905		1	0		1		4				1					15.07	0.017																		14.626
IVGNm00242	AK021069	mRNA					AK160522			AK003065,AK160522,BC051214,BC094635,D00208,NM_011311,X05835,X16190,Z36947	193			193		1	0								9					17.343	0.09																		6.665
IVGNm00243	AK021231,AK034616,AK084600,AK142083,NM_001101479	mRNA							NM_001101479		5218	5011	527	5745	1	0.908	0	0.192	1		18		1	2		uc008pdb.1		AK021231,Pabpc4l	RIKEN full-length enriched library, clone:C330050A14 product:unclassifiable, full insert sequence.,Mus musculus ES cells cDNA	914.562	0.175	2490.68																	5.803
IVGNm00244	AK021294	ncRNA	TRUE	NM_030732						AK029595,AK033347,AK036064,NM_030732	401			401		1	0						1	1						127.139	0.317																		9.742
IVGNm00245	AK021309	ncRNA				AF037205,AF037206,AK036591,AK050095,AK082296,AK139447,AK140682,AK158046,AK167278,BC058182,NM_001113413,NM_011883	NM_011883				770		48	818	1	0.941	0	1.299	1		2									21.34	0.028	-40.4945																	11.73
IVGNm00246	AK021311	ncRNA				BC139134,BC145544,DQ157748,NM_027770	DQ157748				1027			1027		1	0				4									84.209	0.082																		9.354
IVGNm00247	AK021356	mRNA				AK034804,BC058387,BC131987,BC132317,NM_011372,Y11342	NM_011372				866			866		1	0				1				9					448.989	0.518	271.466				29.649	26.1498	27.1777	13.3578	19.2369	5.73987	12.9372	208.415	3.47358	0.768101	0.15239	66.7933	-186.035	5.773
IVGNm00248	AK028005	ncRNA									707		751	1458	2	0.485	0	2.829			1					uc008qlw.1		AK028005	RIKEN full-length enriched library, clone:1190003I05 product:unclassifiable, full insert sequence.,Mus musculus 18-day embryo whole body cDNA	25.79	0.036	-185.997																	5.651
IVGNm00249	AK009388,AK028395,AY974584,BC016272,BC085102,BC131941,BC131943,L10666,NM_008141	mRNA									2518	1065	6590	8239	8	0.169	0	5.957			3		2	1		uc008qyc.1	NM_008141	Gnat2	alpha,guanine nucleotide binding protein	1199	1.004	1943.16				235.531	224.265	251.819	217.474	198.225	166.031	131.002	1206.24	20.1039	0.931577	0.032346	334.624	-751.667	6.977
IVGNm00250	AF062655,AK028412,AK219253,BC079542,BC094322,NM_001130477,NM_016799	mRNA									4730	2754	29014	32731	17	0.081	0	10.753			10	1	2		5	uc008vge.1,uc008vgf.1,uc008vgg.1	NM_016799	Srrm1	complete cds.,Mus musculus plenty-of-prolines-101 mRNA,serine/arginine repetitive matrix 1	4125.54	0.965	3260.89				37.902	33.9516	45.982	32.4307	26.585	18.8583	20.1733	438.192	7.30319	0.745526	0.0928652	117.9	-255.264	10.444
IVGNm00251	AK028469,AK046248,AK049713,AK083425,AK133298,AK171092,BC052073,NM_178654	mRNA		AK085299	AK035730						3796	2952	84929	88692	22	0.033	0.612	6.207			4	1	2	1		uc008rpe.1,uc008rpf.1	NM_178654	Pkn2	protein kinase N2	3432.91	0.924	1218.27				56.4149	47.9053	55.0478	32.5964	25.894	12.1918	13.6909	290.755	4.84591	0.923175	0.0604624	133.766	-1674.75	8.745
IVGNm00252	AK028548	ncRNA				AK034532,AK159126,AK159549,AK171791,AK172390,BC052079,BC095934,NM_175386	BC052079				2388		70	2458	1	0.972	0	0.419			5									107.678	0.045	-28.1653																	5.425
IVGNm00254	AK002483,AK028686,AK037969,AK075673,AK085493,AK141684,AK152624,AK169686,AK181850,AK187002,BC012522,BC057670,NM_025794	mRNA		NM_029482	NM_026352			BC107017			3736	1851	22699	24933	12	0.033	0	6.098			6	1	2	3	1	uc008pnq.1,uc008pnr.1,uc008pns.1,uc008pnt.1	NM_025794	Etfdh	MITOCHONDRIAL PRECURSOR (EC 1.5.5.1) (ETF-QO) (ETF-UBIQUINONE OXIDOREDUCTASE) (ETF DEHYDROGENASE) (ELECTRON-TRANSFERRING- FLAVOPROTEIN DEHYDROGENASE) homolog [Homo sapiens], RIKEN full-length enriched library, clone:0610010I20 product:ELECTRON TRANSFER FLAVOPROTEIN-UBIQUINONE OXIDOREDUCTASE, full insert sequence.,Mus musculus adult male kidney cDNA,electron transferring flavoprotein	1600.5	0.738	1813.94				236.676	235.631	225.82	188.528	145.303	84.0061	67.0567	449.078	7.48463	0.986154	0.0185852	288.39	1014.15	6.673
IVGNm00255	AK029013,AK030304,AK053633,AK054289	mRNA							AK154041		3906	1121	605	4511	1	0.866	0	0.256	3		8			2	3					2177.92	0.558	2315.59																	6.838
IVGNm00256	AK029132	ncRNA	TRUE								3462		4382	7844	1	0.441	0	0.289			6		1	1						117.543	0.034	8.4578																	6.172
IVGNm00257	AK029161,AK147316,AK147413,AK147422,AK147667,BC008522,NM_080793	mRNA							AK147422		7408	1098	38150	45560	7	0.158	0	0.975	2		10		1	1		uc008peb.1	NM_080793	Setd7	SET domain-containing protein 7	3372.54	0.599	1231.55				232.058	207.089	198.094	142.436	121.955	101.98	75.4704	247.622	4.12704	0.971621	0.0408239	147.846	761.599	5.532
IVGNm00258	AK029296	mRNA		AK083328						BC038305	3065			3065		1	0		1		1			1						1451.41	0.474	90.8564				25.0624	19.6371	18.789	9.73395	12.1248	12.5243	17.2073	55.8103	0.930171	0.732194	0.649996	16.3102	-39.2534	6.672
IVGNm00259	AK029363,AK036692,BC150482,NM_029885,NM_172512	mRNA		AK020406					AK087979		9400	1242	27676	36175	9	0.235	0	1.036	2	1	14	3	1	2		uc008qin.1,uc008qio.1,uc008qip.1,uc008qiq.1	NM_029885,NM_172512	Gabpb2	RIKEN full-length enriched library, beta 2, clone:1810015F01 product:unclassifiable, full insert sequence.,GA repeat binding protein,Mus musculus 10 day old male pancreas cDNA	2786.37	0.299	1814.27				555.527	526.462	378.875	278.048	189.013	153.164	119.159	156.421	2.60702	0.99569	0.0237544	125.332	208.022	9.009
IVGNm00260	AK029482,AK173172,BC057456,NM_011197	mRNA							AK173172		5786	2637	64145	69931	8	0.083	0.297	1.383	1		5	1	1			uc008qre.1	NM_011197	Ptgfrn	prostaglandin F2 receptor negative regulator	3113.52	0.565	3034.62				1263.91	1261.49	1036.35	811.64	475.807	273.424	153.949	291.027	4.85045	0.995941	0.013371	231.014	393.163	5.999
IVGNm00261	AK029582	ncRNA	TRUE								3838		548	4399	1	0.875	0	0.261			15		1							740.733	0.193	-25.8895
IVGNm00262	AK029620	ncRNA	TRUE								586		31564	32150	3	0.018	0	5.119								uc008rpk.1		AK029620	RIKEN full-length enriched library, clone:4930415B09 product:unclassifiable, full insert sequence.,Mus musculus adult male testis cDNA	128.407	0.219
IVGNm00263	AK029633	ncRNA			AK041642						445		7363	7808	1	0.057	0	2.247			1					uc008paf.1		AK029633	RIKEN full-length enriched library, clone:4930417J09 product:unclassifiable, full insert sequence.,Mus musculus adult male testis cDNA	180.049	0.405																		5.52
IVGNm00264	AK015168,AK029638	ncRNA						NM_001163516			1058		62773	63831	7	0.017	0	6.616			3		1	1		uc008owy.1		AK029638	RIKEN full-length enriched library, clone:4930419G24 product:unclassifiable, full insert sequence.,Mus musculus adult male testis cDNA	171.629	0.162	-0.3176																	10.02
IVGNm00265	AK029677	mRNA						M97013			3056		17877	20933	1	0.146	0	0.327			2									461.047	0.151	97.9882																	4.553
IVGNm00266	AF220100,AK006269,AK012070,AK014879,AK029752,AK029764,AK165415,BC013512,NM_001146001,NM_021517	mRNA		AK145332,NR_015596	NM_026229						2891	1557	38445	40801	9	0.047	0.539	4.235			2	1	1	1		uc008qoi.1,uc008qoj.1,uc008qok.1	NM_021517	Pdzk1	PDZ domain containing 1	1226.1	0.618	738.793																	7.993
IVGNm00267	AK029761	ncRNA	TRUE								3299		79814	83113	7	0.04	0	2.122			12		1							105.853	0.032	22.4766																	5.789
IVGNm00268	AK029808,AK032353,AK039158,AK043238,AK080785,AK157728,BC050200,BC117020,BC117022,BC144774,NM_177027	mRNA						BC156134			4709	1623	167976	170353	7	0.008	0.218	4.177	2		16	2	1	1	5	uc008sry.1,uc008srz.1	NM_177027	D4Wsu132e,Zcchc7	11 days embryo whole body cDNA, CCHC domain containing 7, RIKEN full-length enriched library, clone:2810427L13 product:weakly similar to HSPC086 (FRAGMENT) [Homo sapiens], full insert sequence.,Mus musculus 10,zinc finger	1619.45	0.835	588.913				111.07	99.3004	78.7865	55.1235	54.3074	46.0119	59.4182	85.9582	1.43264	0.962716	0.130405	49.1659	341.55	6.806
IVGNm00269	AK016993,AK029569,AK029938,NM_028971	mRNA			AK081042,AK157225						3990	1674	7713	11703	14	0.316	0.406	3.838	1	1	5	2				uc008psp.1		4933430H15Rik	RIKEN full-length enriched library, clone:4933430H15 product:hypothetical Leucine rich repeat, full insert sequence., ribonuclease inhibitor type containing protein,Adult male testis cDNA	1643.05	0.415	2265.11																	7.813
IVGNm00270	AK029958	ncRNA	TRUE								3135		65877	69012	18	0.045	0	5.742	1		6		1			uc008oyr.1		AK029958	RIKEN full-length enriched library, clone:4932411C10 product:unclassifiable, full insert sequence.,Mus musculus adult male testis cDNA	92.943	0.03	15.1115																	6.46
IVGNm00271	AK030060	mRNA	TRUE								3120		23	3143	1	0.993	0	0.321			5		1							392.222	0.126	51.7599																	6.214
IVGNm00272	AK030119	ncRNA	TRUE								2794		38886	41680	17	0.067	0	6.084			5		1	1						70.494	0.025	1.9621																	5.691
IVGNm00273	AK016465,AK030195,AK143401,AK162954,BC011159,BC029823,CT010373,L08431,M84487,NM_011693,U12884,X67783	mRNA									3398	2217	16271	19669	8	0.12	0.408	3.604	2		6	3	1	1		uc008rbx.1,uc008rby.1	NM_011693	Vcam1	RIKEN full-length enriched library, clone:4933416C16 product:vascular cell adhesion molecule 1, full insert sequence.,Adult male testis cDNA,vascular cell adhesion molecule 1	1597.32	0.583	917.78																	8.269
IVGNm00274	AF289486,AF289487,AK030293,AK035735,AK049506,BC167179,NM_001177849,NM_023066	mRNA			AK032549,AK084350						6652	2223	213813	220260	23	0.01	0.148	10.356			8	3	2	2		uc008ryf.1,uc008ryg.1,uc008ryh.1	NM_023066	Asph	aspartyl beta-hydroxylase isoform 1	2738.43	0.738	2077.07				25.6305	25.5843	30.8835	25.4299	23.9606	18.2959	18.2097							8.191
IVGNm00275	AK030551,AK081392	mRNA		AK075617						AK034732,AK075617,AK087551,AK087608,AK157132,AK172003,AK172105,AK172722,BC022899,BC066221,NM_178891,NR_024139	3685			3685		1	0				3		1	1						1049.12	0.316	244.761				26.5541	17.7873	25.9655	9.16039	18.558	8.31009	15.0125							13.397
IVGNm00276	AK030561	mRNA			AK016388			AK017132			2173	312	1440	3613	1	0.601	0.144	0.46			5	2	1	1		uc008pic.1		AK030561	RIKEN full-length enriched library, clone:5330432B20 product:unclassifiable, full insert sequence.,Mus musculus adult male pituitary gland cDNA	461.243	0.212	341.83																	8.936
IVGNm00277	AK030783,AK046860,NR_033498	mRNA						AK038087	BC127040		5544	420	9275	14819	1	0.374	0	0.18			21		1	1				AI504432		1782.35	0.321	-305.006																	7.186
IVGNm00278	AK014895,AK016853,AK028215,AK030918,AK089060,BC006731,NM_001135149,NM_001135150,NM_026228	mRNA									4212	1386	59802	63113	8	0.032	0.115	4.049			17	2	1	1		uc008rlz.1,uc008rmb.1,uc008rmc.1	NM_026228	AK030918,Slc39a8	RIKEN full-length enriched library, clone:5830455K23 product:BCG INDUCED INTEGRAL MEMBRANE PROTEIN BIGMO-103 (UP-REGULATED BY BCG-CWS) homolog [Homo sapiens], full insert sequence.,Mus musculus adult male thymus cDNA,solute carrier family 39 (metal ion	1446.73	0.647	1575.21																	6.207
IVGNm00279	AK030949,NR_015499	ncRNA	TRUE								3135		7691	10826	1	0.29	0	0.319			3			1				C030034L19Rik		249.705	0.08	7.3193	TRUE																9.887
IVGNm00280	AK031067	mRNA			AK087111				BC137743		3039		560	3599	1	0.844	0	0.329			8		1	1						238.399	0.078	4.8967																	8.249
IVGNm00281	AK010212,AK031123,BC048244,NM_008862	mRNA							NM_008862		3682	228	75080	78762	2	0.046	0	0.553			11	1	1			uc008oof.1	NM_008862	Pkia	alpha,protein kinase inhibitor	1487.85	0.404	161.462				180.593	152.908	169.99	147.197	128.033	137.581	130.162							6.511
IVGNm00282	AK031303	mRNA									2726			2726		1	0		1		4									664.509	0.244	14.6091																	7.465
IVGNm00283	AK031663	ncRNA						BC027267	AF065905		4794			4795		1	0		1		14		1							715.693	0.149	-18.8084																	5.423
IVGNm00284	AK031828	ncRNA									3869		6256	10125	4	0.382	0	1.034			8		1	1		uc008rik.1		AK031828	RIKEN full-length enriched library, clone:6330410L21 product:unclassifiable, full insert sequence.,Mus musculus adult male medulla oblongata cDNA	234.509	0.061	29.3648																	5.41
IVGNm00285	AK004351,AK031871,AK076611,AK122333,AK159746	mRNA									5603	1605	12935	18539	8	0.302	0.188	1.428	1		10		1			uc008qtg.1		AK031871	RIKEN full-length enriched library, clone:1110062K04 product:homeodomain interacting protein kinase 1, full insert sequence.,Mus musculus 18-day embryo whole body cDNA	4383.87	0.873	2394.35				2281.84	2227.41	1950.52	1755.11	1227.8	1036.74	658.331	379.841	6.33068	0.988773	0.0184434	258.802	713.566	9.338
IVGNm00286	AK032042,BC022753,BC040217,BC106167	mRNA,ncRNA		AK147872					NM_133665		3975			3975		1	0		1		2		1		2	uc008pud.1		Mef2d	RIKEN full-length enriched library, clone:6330559I22 product:unclassifiable, full insert sequence.,Mus musculus adult male medulla oblongata cDNA	1853.5	0.691	4.9247				2068.26	1957.3	1800.64	1593.88	1087.91	740.033	738.389	308.424	5.14039	0.985138	0.0246009	204.724	625.018	10.493
IVGNm00287	AK032066,AK144225,AK163459,BC012712,BC057002,BC110662,D49482,NM_011020,U23921	mRNA			AK132132						3662	2517	41195	44857	18	0.054	0.276	7.194	1		5	1	1	1	8	uc008pbj.1,uc008pbk.1	NM_011020	Hspa4l,apg-1b	complete cds.,Mus musculus mRNA for APG-1B,heat shock protein 4 like	3205.42	0.938	1328.52				104.055	142.986	153.639	113.19	80.298	34.695	31.5705	597.04	9.95066	0.80818	0.067302	162.128	-354.847	8.389
IVGNm00288	AK032130	mRNA							AK148840		2956			2956		1	0		2		7		2	1						681.269	0.23	1.9563																	9.289
IVGNm00289	AJ250375,AK014280,AK014889,AK021250,AK032275,AK088960,BC019566,NM_001164533,NM_022994	mRNA		AK088497							4538	1188	24942	29480	12	0.041	0.722	8.929			7	3	1	1		uc008pxg.1,uc008pxh.1	NM_022994	Dap3	death-associated protein 3	1175.27	0.721	1181.44				1443.57	1594.76	1516	1298.66	931.634	612.557	357.247	599.859	9.99765	0.968754	0.024768	301.154	73733.7	11.958
IVGNm00290	AF291875,AF291876,AF291877,AK032321,AK147614,NM_001038587,NM_001146296,NM_019655	mRNA			NM_009602			X51976	NM_001038587		5910	3534	32516	38384	14	0.153	0	3.008			3		1	1		uc008pzv.1,uc008pzw.1,uc008pzx.1,uc008pzy.1,uc008pzz.1	NM_001038587,NM_019655	Adar	RNA-specific isoform 1, RNA-specific isoform 2,adenosine deaminase	2601.36	0.449	3760.85				1364.96	1097.04	772.694	533.385	352.324	264.884	213.802	119.135	1.98559	0.99325	0.0388479	91.0144	172.403	15.441
IVGNm00291	AK032496,AK136540,AK165882,BC060614,NM_001080755,NM_198416	mRNA							BC153178		7600	2730	61328	67354	13	0.089	0	1.991			11		1	1		uc008rtm.1,uc008rtn.1,uc008rto.1,uc008rtp.1	NM_001080755,NM_198416	Zzz3	ZZ domain containing 3,zinc finger	4593.17	0.608	438.773				700.178	642.499	499.507	422.519	302.662	210.81	133.489	247.906	4.13176	0.991146	0.0225559	180.518	395.573	9.354
IVGNm00292	AK028418,AK029458,AK032517,AK138011,AK160815,AK166066,AK167730,BC014763,BC023780,NM_057172	mRNA		AK160761	NM_199465						6491	2100	21781	26373	21	0.111	0.297	9.795	2		12	2	2	4		uc008rst.1,uc008rsu.1,uc008rsv.1,uc008rsw.1,uc008rsx.1,uc008rsy.1,uc008rsz.1,uc008rta.1	NM_057172	Fubp1	far upstream element (FUSE) binding protein 1	5789.16	0.984	685.126				867.157	1341.25	1026.11	964.616	620.166	282.015	169.552	577.364	9.62274	0.853316	0.0579907	178.462	-467.418	12.732
IVGNm00293	AF060178,AK032527,AK088698,AK165112,BC025443,BC059008,NM_011828	mRNA		NM_053102					AK215582		4715	1068	134299	139027	6	0.015	0.253	2.948	1		10	1	1	2		uc008rpp.1	NM_011828	Hs2st1	heparan sulfate 2-O-sulfotransferase 1	2772.95	0.765	1472.13				692.896	673.742	553.191	495.49	298.179	218.774	168.147	281.628	4.69379	0.991395	0.0200242	204.6	451.674	9.794
IVGNm00294	AK004586,AK032688,AK075859,AK135235,AK136108,AK152444,AK159554,AK166645,AK191801,BC024891,NM_025813	mRNA									2982	1392	19084	21468	15	0.06	0.273	12.407			3	1	1	1		uc008plp.1	NM_025813	Mfsd1	major facilitator superfamily domain containing	1238.12	0.782	1198.58				2428.38	2281.76	2396.98	2364.31	1929.48	1618.73	758.203	1400.61	23.3434	0.978643	3.44386	1715.23	1183.52	11.994
IVGNm00295	AF475086,AK030819,AK033008,AK035029,AY083531,BC106856,BC106857,NM_134160	mRNA									2985	1662	17144	20129	11	0.088	0.556	6.619			6	1	1	1		uc008rqx.1	NM_134160	Mcoln3	mucolipin 3	1499.6	0.873	451.359				65.1632	49.6722	85.7436	67.307	63.9987	46.3116	33.1636							8.808
IVGNm00296	AK033022	ncRNA				AK088000,AK137001,AK147554,AK159279,AK159306,BC021496,BC023794,BC023964,BC025618,BC025627,BC025811,BC032187,BC033435,BC033471,BC042435,NM_144900	BC033435			AK181228,BC010319,BC034177,BC035352	1320			1321		1	0				4									187.829	0.142	22.1109																	6.611
IVGNm00297	AK033061	ncRNA	TRUE								638		8365	9003	1	0.071	0	1.567			2					uc008osu.1		AK033061	RIKEN full-length enriched library, clone:7530428D23 product:weakly similar to EPHRIN TYPE-A RECEPTOR 5 PRECURSOR (EC 2.7.1.112) (TYROSINE-PROTEIN KINASE RECEPTOR EHK-1) (EPH HOMOLOGY KINASE-1) (BRAIN-SPECIFIC KINASE) (CEK-7) [Mus musculus], full insert sequence.,Mus musculus adult male eyeball cDNA	6.326	0.01																		5.822
IVGNm00298	AF315511,AK033214,BC013093,BC031772,NM_138591	mRNA									2589	2256	42356	44945	17	0.057	0.852	6.685			4	1	1	3		uc008plm.1	NM_138591	Gfm1	mitochondrial 1,G elongation factor	1964.11	0.764	1661.34				393.174	422.172	480.198	461.522	349.868	212.004	78.7954	1123.86	18.731	0.902992	1.75965	1895.13	798.779	9.766
IVGNm00299	AK033215,BC059088	ncRNA				AK031655,AK034558,AK035038,AK141181,AK142411,AK142974,AK164239,BC115772,NM_009472,U72634	AK035038				2516			2517		1	0		1		4		2	2	4					438.025	0.174																		6.476
IVGNm00300	AK033312	ncRNA	TRUE								2763		12580	15343	5	0.18	0	1.81			9		1	1						214.838	0.078	-18.0545																	5.027
IVGNm00301	AF121344,AK013350,AK015705,AK033543,BC046784,BC058695,NM_019571	mRNA									3172	804	159122	162230	7	0.019	0.186	6.289			3		2	1		uc008rnp.1,uc008rnq.1	NM_019571	Tspan5	complete cds.,Mus musculus tetraspanin Tspan-5 (Tspan5) mRNA,tetraspanin 5	1395.43	0.707	1244.08																	7.87
IVGNm00302	AB017156,AK007466,AK008659,AK033560,AK136476,BC028343,BC116318,BC116319,NM_017474	mRNA									3655	2742	25305	28960	13	0.101	0.749	4.557	1		4		1	2		uc008rqf.1	NM_017474	Clca3	chloride channel calcium activated 3	1830.71	0.628	2504.33																	7.945
IVGNm00303	AK033932	ncRNA				AF357241,AK137738,BC106769,BC106770,NM_080466	AK137738	X51976			2437			2437		1	0		1		1				9					76.075	0.031	19.4858																	8.101
IVGNm00304	AK034327	ncRNA	TRUE								3451		28788	32239	4	0.107	0	1.159			14		1	1						756.295	0.219	15.8135
IVGNm00305	AK034351	ncRNA	TRUE								4824		2901	7725	1	0.624	0	0.207			3		1	1						677.775	0.141	21.5074																	4.726
IVGNm00306	AK034424,BC115867,NM_001110240	mRNA									10502	2136	234336	244838	9	0.015	0.203	1.278	3		13		1	5		uc008tmj.1,uc008tmm.1	NM_172426	Slc24a2	solute carrier family 24	3498.34	0.491	1782.38																	7.984
IVGNm00307	AK034478	ncRNA	TRUE								3515		17396	20911	4	0.168	0	1.138			4									150.863	0.043	8.6436																	7.736
IVGNm00308	AK034582	ncRNA				AB038662,AB038663,AB038664,AB038665,AB038666,AB038667,AF475069,AF475070,AF475071,AF475072,AF475073,AF475074,AF475075,AF475076,AF475077,AF475078,AK034465,AK048796,AK134467,AK173075,BC079881,NM_001163348,NM_001163349,NM_001163350,NM_001163351,NM_030699,NM_133488	AK173075				2838			2838		1	0		1		9									373.513	0.132	-80.3811																	5.439
IVGNm00309	AK021231,AK034616,AK084600,AK142083,NM_001101479	mRNA							NM_001101479		5218	5011	527	5745	1	0.908	0	0.192	1		18		1	2		uc008pdb.1		AK021231,Pabpc4l	RIKEN full-length enriched library, clone:C330050A14 product:unclassifiable, full insert sequence.,Mus musculus ES cells cDNA	914.562	0.175	2490.68																	7.905
IVGNm00310	AB093234,AF155819,AF155821,AK018970,AK032424,AK034632,AY968047,AY968048,BC133685,NM_001111051,NM_001111052,NM_001195538,NM_001195539,NM_019978	mRNA									7803	2271	288743	296543	16	0.018	0	3.048			7	1	1	3		uc008pgl.1,uc008pgm.1,uc008pgp.1,uc008pgq.1,uc008pgr.1,uc008pgs.1	NM_019978	Dcamkl1,Dclk1,mKIAA0369	CLICK-I.,Mus musculus mRNA for mKIAA0369 protein.,doublecortin-like kinase 1	4565.26	0.62	3625.26				101.997	84.0962	99.5162	85.2615	65.7245	29.9721	22.7148	641.12	10.6853	0.926271	0.0380391	243.948	-1020.73	10.126
IVGNm00311	AK034632,NM_001111051,NM_001111052,NM_001195538,NM_001195539	mRNA									7803	2220	288740	296543	16	0.026	0	2.05			7	1		3				Dclk1		4565.26	0.585	3625.26
IVGNm00312	AK034693	ncRNA						BC046995	BC024111	AK012316	1495			1496		1	0													439.442	0.294																		6.172
IVGNm00313	AK014202,AK034783,AK083941,AK085187,BC044809,BC087731,NM_173181	mRNA									3361	972	47062	50423	8	0.025	0	6.7	2		9		1	2	2	uc008oog.1	NM_173181	3110050N22Rik	hypothetical protein LOC67306	1237.55	0.799	565.397				544.826	497.025	291.559	119.866	64.1869	44.8838	39.9338	105.979	1.76632	0.992705	0.0455221	80.1614	156.329	9.096
IVGNm00314	AK018659,AK034835	ncRNA			AK032111						2447			2449		1	0		1		1		1	2						156.964	0.069	8.6224																	11.327
IVGNm00315	AK034850,AK051772	ncRNA				AK031655,AK034558,AK035038,AK141181,AK142411,AK142974,AK164239,BC115772,NM_009472,U72634	AK035038				4687			4687		1	0				12		1		3					749.18	0.16	-0.634																	4.708
IVGNm00316	AF326561,AF326562,AK035210,AK044370,AK134970,AK139337,BC018385,NM_019535,U58886	mRNA									2806	1293	192118	194404	11	0.006	0.376	7.168	1		4	1	1	1		uc008tlo.1	NM_019535	Sh3gl2	SH3-domain GRB2-like 2	1895.63	0.971	1799.9																	10.62
IVGNm00317	AK035353,NR_030693	ncRNA	TRUE								3969		48858	52827	3	0.075	0	0.756			7		1	2		uc008ryq.1		4930412C18Rik,AK035353	RIKEN full-length enriched library, clone:9530021J03 product:unclassifiable, full insert sequence.,Mus musculus adult male urinary bladder cDNA	373.955	0.094	-67.9909																	8.758
IVGNm00318	AK035376	ncRNA	TRUE								1569		2093	3662	1	0.428	0	0.637	1		4		1	1						57.561	0.037																		5.739
IVGNm00319	AK035404	ncRNA									2074		8363	10437	2	0.199	0	0.964	1		4		1							103.018	0.05	3.0159																	10.598
IVGNm00320	AK035416	ncRNA						AK133986			1966		3213	5179	1	0.38	0	0.509			2		1							154.434	0.079	10.7052																	5.896
IVGNm00321	AK035453,BC063049	mRNA		NM_027315							4663			4663		1	0				11		1	1						766.143	0.179	32.46																	5.249
IVGNm00322	AK035466,AK085299	ncRNA		AK133298							3095		9055	12150	1	0.255	0	0.323			11		1			uc008rph.1		AK035466	RIKEN full-length enriched library, clone:9530052C20 product:unclassifiable, full insert sequence.,Mus musculus adult male urinary bladder cDNA	650.383	0.21	-26.0593																	6.104
IVGNm00323	AF422243,AF487898,AK030414,AK035481,AK087083,BC058555,NM_153564	mRNA									3961	2172	30244	32828	11	0.079	0.121	5.447	2	2	6	6	1	1	3	uc008rop.1,uc008roq.1	NM_153564	Gbp5	complete cds.,Mus musculus guanylate binding protein 5 (Gbp5) mRNA,guanylate-binding protein 5	711.371	0.327	688.762																	5.445
IVGNm00324	AK035802	ncRNA		U72634							2418		4940	7358	1	0.329	0	0.414			5		1	1						150.064	0.062	-45.1683																	6.175
IVGNm00325	AK035866	ncRNA						NM_177274			2293		14625	16918	1	0.136	0	0.436			5		2	1						644.145	0.281	-22.1942																	5.809
IVGNm00326	AK035881,AY454345,NM_010657	mRNA					NM_010657				9021	7044	311713	320734	8	0.009	0.421	0.893	1	1	3	1			9	uc008una.1	NM_010657	Hivep3	human immunodeficiency virus type I enhancer	5932.48	0.658	5889.19				27.1669	21.3747	26.4377	19.7167	24.5714	13.8884	17.6459							8.576
IVGNm00329	AK029239,AK035928,AK035981,AK047075,AK163889	mRNA,ncRNA		BC014750		AK043125,NM_030595,Y18276.1	NM_030595			AF040945,AF228913,AK032114,AK043552,BC014750,NM_010750	5575		4507	9016	1	0.5	0	0.222	2		22		2	3						1582.03	0.41	56.1624																	5.531
IVGNm00330	AK035963,AK082782,AK086251,AK086677,BC031117,NM_001082414	mRNA							AK050185		6407	2370	39675	46088	14	0.134	0	2.278	1		10	1	1	1		uc008pra.1,uc008prb.1	NM_001082414	Sh3d19	SH3 domain protein D19	2859.46	0.457	1373.03																	5.907
IVGNm00331	AK029239,AK035981,AK163889	mRNA,ncRNA				AK043125,NM_030595,Y18276.1	NM_030595				5575		4507	9016	1	0.5	0	0.222	2		22		2	3						1272.05	0.338	56.1624																	5.593
IVGNm00332	AK036289,AK041117,AK078047,AK078291,AK081779	mRNA,ncRNA							BC049121		2478			2478		1	0				5		1	1	3	uc008qqv.1		AK036289	RIKEN full-length enriched library, clone:9630053P20 product:unclassifiable, full insert sequence.,Mus musculus 16 days neonate cerebellum cDNA	609.072	0.269	-188.823	TRUE																9.027
IVGNm00333	AK036382,AK139055	ncRNA							NM_025679		2317			2317		1	0				3		1	2						341.384	0.199	-21.7047				110.952	82.6558	98.2369	74.7249	79.3758	53.5758	46.9509	484.596	8.07659	0.823532	0.0698377	148.679	-384.801	5.767
IVGNm00334	AK036601	ncRNA	TRUE	AK084825							2969		29610	32579	5	0.091	0	1.684			6		1							537.051	0.181	2.2287																	7.426
IVGNm00335	AK037085	mRNA						X51976	BC106770		3446			3446		1	0				5		2							865.553	0.251	-146.82				171.39	124.037	108.978	62.4706	52.3217	26.6851	22.9454	147.615	2.46024	0.960906	0.0769671	83.9442	611.201	5.845
IVGNm00336	AK037135	mRNA				BC172642,D32210,NM_010928,X68279	D32210				3063			3063		1	0				3				1					576.01	0.188	50.3765																	6.215
IVGNm00337	AK037334	ncRNA				AK122433,BC005523,BC098461,NM_001163387,NM_138666	AK122433				3721			3722		1	0		2		11									395.791	0.106	-16.4351																	5.218
IVGNm00338	AB022345,AK037490,AK037742,AK076322,AK089202,AK162233,AK163168,AK165599,AK171192,AK171252,AY766236,AY766237,BC141402,BC141408,NM_011990	mRNA									9227	1506	548670	551056	11	0.004	0.163	5.667	3	1	12	3	1	1		uc008pdi.1,uc008pdj.1	NM_011990	Slc7a11	solute carrier family 7 (cationic amino acid	1995.39	0.744	1768.06				29.9681	23.7941	36.756	23.9398	19.2149	8.27698	9.61921	509.875	8.49791	0.758784	0.0830531	133.23	-279.072	6.598
IVGNm00339	AB004665,AK004974,AK038231,AK087967,AK144706,AK159674,AK163783,AK170483,AK201575,BC065076,NM_016858	mRNA		AK143171,AK163877					BC065076		3472	687	8775	12247	1	0.237	0	0.366			6	2	3	3	7	uc008pea.1	NM_016858	Rab33b	member of RAS oncogene family,RAB33B	1042.03	0.353	1344.97				51.6036	29.8314	21.2843	9.94103	14.042	11.3354	25.0865	24.4362	0.407271	0.869793	0.940665	9.64124	-45.7135	6.076
IVGNm00340	AK014113,AK014247,AK017452,AK017694,AK019264,AK033553,AK035590,AK038295,AK134305,BC004090,NM_025679	mRNA									2798	624	5377	8175	4	0.15	0	4.251	1		5	3		2		uc008qsf.1	NM_025679	5730470L24Rik	hypothetical protein LOC66641	881.899	0.709	1091.72				833.463	831.134	643.306	544.786	379.979	230.612	141.526	300.128	5.00213	0.994562	0.0151218	230.338	430.591	8.779
IVGNm00341	AK038322	mRNA		NM_007901							1578	308		1579		1	0.195				3			1						185.883	0.118	-263.351																	5.172
IVGNm00342	AK038444	ncRNA	TRUE								1747		24503	26250	3	0.067	0	1.717			2									351.606	0.201																		6.49
IVGNm00343	AK038550,AK136882	ncRNA		AK034523							4401		83515	87916	1	0.049	0	0.233			10			1		uc008rkt.1		AK136882	RIKEN full-length enriched library, clone:9330210C06 product:unclassifiable, full insert sequence.,Mus musculus adult male diencephalon cDNA	313.6	0.071	12.453																	5.298
IVGNm00344	AK008013,AK038560,AK083264,BC119043,NM_028808	mRNA						AK047743			2524	2460	463	2987	1	0.767	0.96	0.657	1		7	1	1	2		uc008piq.1	NM_028808	P2ry13	purinergic receptor P2Y13	433.775	0.273	2880.64																	9.276
IVGNm00345	AK039154	ncRNA				AK018543,AK049892,BC104490,BC104733,BC104734,D86238,NM_001205099,NM_008731	D86238				2164			2164		1	0				4									92.546	0.043																		5.077
IVGNm00346	AK039352	ncRNA	TRUE								2402		1205	3607	2	0.666	0	0.833	2		7		1	2						514.661	0.214	0.504				48.3083	39.5486	47.6426	38.6389	37.7657	22.7921	20.7829	681.03	11.3505	0.869501	0.0512749	204.438	-511.582	9.297
IVGNm00347	AK039415	ncRNA				AB032591,AK039764,AK044552,AK083141,NM_001163516,NM_021483	NM_001163516	AK015168			2827			2827		1	0		1		3									110.357	0.039	-50.4448																	8.322
IVGNm00348	AK039433,AK157633,NM_009425	mRNA									4944	873	17645	22589	4	0.219	0	0.811			8		1	2		uc008otm.1	NM_009425	Tnfsf10	tumor necrosis factor (ligand) superfamily	591.012	0.12	421.493																	4.789
IVGNm00349	AK039443,AK039581	ncRNA				AK158073,BC024837,NM_145922	BC024837				2636			2636		1	0				1				2					535.143	0.203	24.6567																	6.548
IVGNm00350	AK039598	ncRNA							NM_011443		917			917		1	0				2				7					600.67	0.655	-349.772			Sox2ot														5.175
IVGNm00351	AK039770	ncRNA				AK122433,BC005523,BC098461,NM_001163387,NM_138666	AK122433				3798			3798		1	0		3		14									142.47	0.038	6.8218																	7.994
IVGNm00352	AK037741,AK039918,AK053975,AK081263	ncRNA	TRUE								3921		31357	34170	3	0.082	0	1.018			6		1	1		uc008ooz.1		AK039918	RIKEN full-length enriched library, clone:5830468H01 product:unclassifiable, full insert sequence.,Mus musculus adult male thymus cDNA	213.291	0.075	-0.153	TRUE
IVGNm00353	AK030783,AK040017,AK046860,NR_033498	mRNA						AK038087	BC127040		5544	420	9275	14819	1	0.374	0	0.18			21		1	2				AI504432		1782.35	0.355	-305.006																	5.799
IVGNm00354	AK040146,AK049332,AK129445,AK147466,NM_001130184,NM_001130185,NM_001130186,NM_172303	mRNA							BC026471		5558	2502	55653	61131	10	0.09	0	1.83			14	3	1			uc008pcj.1,uc008pck.1,uc008pcl.1,uc008pcm.1	NM_172303	Phf17	PHD zinc finger protein Jade1	4614.66	0.832	2591.84				317.879	208.488	119.845	47.6263	32.1695	18.3825	20.4022	67.478	1.12463	0.988341	0.0940941	47.3904	117.124	8.475
IVGNm00355	AK016619,AK030203,AK031605,AK031885,AK040315,AK049520,AK173315,BC054094,NM_025978,NM_027619	mRNA						NM_026222	AK173315		11314	2298	7166	16444	11	0.564	0	1.169	3		25		1	1	5	uc008oxa.1,uc008oxc.1,uc008oxd.1,uc008oxe.1,uc008oxf.1,uc008oxg.1	NM_025978,NM_027619	Ttc14	Tetratricopeptide repeat protein 14 (TPR repeat protein 14).,tetratricopeptide repeat domain 14 isoform a,tetratricopeptide repeat domain 14 isoform b	3582.72	0.323	963.734																	8.773
IVGNm00356	AK031548,AK040377,AK166470,BC023786,BC026832,BC029977,BC036128,NM_146150	mRNA			AK131984						4155	3486	56944	60967	30	0.058	0.543	10.09			6	3	1	1		uc008ubw.1,uc008uby.1	NM_146150	Nrd1	N-arginine dibasic convertase, NRD,nardilysin	3632.34	0.995	2420.36																	8.599
IVGNm00357	AK040387	ncRNA		AJ132394							941		7693	8634	2	0.109	0	2.125							1	uc008qfx.1		AK040387	RIKEN full-length enriched library, clone:A430090J22 product:unclassifiable, full insert sequence.,Mus musculus 0 day neonate thymus cDNA	158.107	0.168	6.9354																	10.8
IVGNm00358	AK040671	ncRNA	TRUE								1128		32128	33256	4	0.034	0	3.546			2					uc008pej.1		AK040671	RIKEN full-length enriched library, clone:A530012F11 product:unclassifiable, full insert sequence.,Mus musculus adult male aorta and vein cDNA	86.603	0.077	-47.2665																	5.528
IVGNm00359	AK040695	ncRNA				AK050337,AK052200,BC099977,M99492,NM_009738	BC099977				1180			1180		1	0		1		5									64.017	0.054																		7.169
IVGNm00360	AK040707,NR_038079	mRNA									1805	387	35126	36931	3	0.049	0.214	1.662	1	1	2				7	uc008pek.1		AK040707,Gm2447	RIKEN full-length enriched library, clone:A530017F20 product:unclassifiable, full insert sequence.,Mus musculus adult male aorta and vein cDNA	310.949	0.172	-181.713																	6.198
IVGNm00361	AK040741,AK040882,AK047674,AK048101,AK084338,AK164170,AK169469,BC063049,BC080683	mRNA		NM_027315		X51976	X51976			AK146707,AY112699,AY945937,BC082275,NM_027315	4663			4663		1	0				11		1	2		uc008qac.1		AK040741	RIKEN full-length enriched library, clone:A530022C24 product:unclassifiable, full insert sequence.,Mus musculus adult male aorta and vein cDNA	766.143	0.164	57.3332	TRUE			35.3458	21.5718	25.2051	15.1191	18.6286	9.82813	16.1594	89.33	1.48883	0.720089	0.396364	26.5566	-65.5026	7.152
IVGNm00362	AK040828	ncRNA							AK087979		2076			2076		1	0		1		3									240.521	0.116	36.1967																	9.071
IVGNm00363	AK040843,FJ422280	mRNA		NM_010516							1320	688	462	1782	1	0.738	0.528	0.768			3	1	1	1						720.543	0.546	-87.8566	TRUE																7.119
IVGNm00364	AK040865	ncRNA							AK210723		1157		3757	4914	3	0.235	0	2.593			2					uc008phc.1		AK040865	RIKEN full-length enriched library, clone:A530031L11 product:unclassifiable, full insert sequence.,Mus musculus adult male aorta and vein cDNA	136.091	0.118	-25.7596																	5.779
IVGNm00365	AK040741,AK040882,AK047674,AK048101,AK084338,AK164170,AK169469,BC063049,BC080683	mRNA		NM_027315		X51976	X51976			AK146707,AY112699,AY945937,BC082275,NM_027315	4663			4663		1	0				11		1	2		uc008qac.1		AK040741	RIKEN full-length enriched library, clone:A530022C24 product:unclassifiable, full insert sequence.,Mus musculus adult male aorta and vein cDNA	766.143	0.164	57.3332	TRUE			25.0393	17.2465	24.9308	12.4443	12.2663	6.42187	14.4054							9.698
IVGNm00366	AK040725,AK040960	ncRNA		BC010552							2838		928	3766	3	0.754	0	1.057			4					uc008rea.1		AK040960	RIKEN full-length enriched library, clone:A530051K04 product:unclassifiable, full insert sequence.,Mus musculus adult male aorta and vein cDNA	265.033	0.096	17.5032																	5.434
IVGNm00367	AB109404,AB112023,AB112025,AK036935,AK040982,AK041165,AK054545,AK154879,AK155731,AK170671,BC145417,BC145418,DQ055453,NM_001173459,NM_001173460,NM_178792	mRNA						AK089558			2484	1191	244116	245386	5	0.005	0.472	4.058			3	1	1	3		uc008oqy.1,uc008ora.1,uc008orb.2,uc008orc.2,uc008ord.2,uc008ore.2	NM_178792	LOC100038947,Sirpb1,Sirpb1b	signal-regulatory protein beta 1 isoform 1	276.846	0.255	88.3335																	5.683
IVGNm00368	AK041239	ncRNA				AK031655,AK034558,AK035038,AK141181,AK142411,AK142974,AK164239,BC115772,NM_009472,U72634	AK035038				2351			2351		1	0				5									263.353	0.112	-98.9805																	9.362
IVGNm00369	AK041310	ncRNA						AK020214			517		1181	1698	1	0.304	0	1.934			1		2	1		uc008rgq.1		AK041310	RIKEN full-length enriched library, clone:A530098K19 product:unclassifiable, full insert sequence.,Mus musculus adult male aorta and vein cDNA	22.915	0.044	41.5565																	6.043
IVGNm00370	AK041359,AK148254,AK148289,NM_198664	mRNA									4305	2766	41505	45810	12	0.058	0.371	4.027			1		1	2		uc008suf.1	NM_198664	Tbc1d2	member 2,TBC1 domain family	2161.81	0.689	3784.76				120.673	121.323	76.5114	61.2223	51.2889	40.8575	38.7119	116.71	1.94517	0.975117	0.0768587	72.9967	290.937	11.55
IVGNm00372	AK039588,AK041636,AK163561,BC127174,NM_030016	mRNA		NM_028349	AK052179,AK079125			AK138965			3159	1446	30093	33252	11	0.095	0.34	4.693			2	2				uc008rcj.1,uc008rck.1,uc008rcl.1	NM_030016	A930028L21Rik,Ccdc76	CLONE PLACE1008122 homolog [Homo sapiens], RIKEN full-length enriched library, clone:A330067P21 product:CDNA FLJ11219 FIS, clone:A630026F18 product:hypothetical protein, full insert sequence.,3 days neonate thymus cDNA,Mus musculus adult male spinal cord cDNA,coiled-coil domain containing 76	1682.06	0.613	162.8																	8.14
IVGNm00373	AK041681	ncRNA				AB093240,AF231110,AK038242,AK153827,AK153848,BC060031,BC096600,NM_020007	AK153827				3374			3374		1	0				6									95.295	0.028	-42.7121																	5.629
IVGNm00374	AK041754,AK129359,NM_001163332,NM_001163333	mRNA							AK051259		4838	1914	46209	51039	5	0.095	0	1.035			4		1					Cttnbp2nl		2939.9	0.608	3599.07				3342.35	2431.18	869.291	378.881	259.904	234.081	195.837	54.8965	0.914942	0.99923	0.0303963	49.3941	61.7786	7.045
IVGNm00375	AF156598,AK011197,AK012815,AK012895,AK017302,AK041835,AK167415,BC019165,NM_001190161,NM_019976	mRNA		AK144267							1742	990	2686	4428	7	0.342	0	5.087					2	3		uc008qyv.1,uc008qyw.1	NM_019976	Psrc1	proline/serine-rich coiled-coil 1	839.387	0.523	1650.96				179.172	163.584	152.175	93.4014	78.916	64.6118	86.0702	139.595	2.32658	0.936857	0.104566	70.6996	5470.05	9.531
IVGNm00376	AK041988	ncRNA				AK006478,NM_027287	NM_027287				3017			3017		1	0		1		8		1	1						268.761	0.089	14.028																	4.758
IVGNm00377	AK042235	mRNA									829		10853	11682	1	0.071	0	1.206			3		1	1		uc008owz.1		AK042235	RIKEN full-length enriched library, clone:A630073M21 product:unclassifiable, full insert sequence.,Mus musculus 3 days neonate thymus cDNA	175.573	0.212	-273.096																	6.06
IVGNm00378	AK042263	ncRNA						BC151102			4512		537	5049	1	0.894	0	0.222			3									984.74	0.218	24.4389																	5.396
IVGNm00379	AK042628	ncRNA				AK031655,AK034558,AK035038,AK141181,AK142411,AK142974,AK164239,BC115772,NM_009472,U72634	AK035038				2098			2098		1	0				7									89.002	0.042																		7.953
IVGNm00380	AK042714	ncRNA	TRUE								2546		209	2755	1	0.924	0	0.393			10					uc008pnb.1		AK042714	RIKEN full-length enriched library, clone:A730018D18 product:unclassifiable, full insert sequence.,Mus musculus 7 days neonate cerebellum cDNA	252.059	0.099	-23.6723																	6.667
IVGNm00381	AK042781	ncRNA				AK031655,AK141181,AK142411,AK142974,AK164239,BC115772,NM_009472,U72634	AK142974				2340			2340		1	0		1		7									205.943	0.088	-177.126																	6.733
IVGNm00382	AK042906	ncRNA				AK031655,AK034558,AK035038,AK141181,AK142411,AK142974,AK164239,BC115772,NM_009472,U72634	AK035038				469			469		1	0								2					147.951	0.315	18.1189				179.178	103.507	105.771	73.4736	51.1284	12.5526	10.7221	207.169	3.45282	0.900004	0.0929392	90.6492	-725.902	9.672
IVGNm00383	AB101658,AK042965,AK087685,AK122577,BC094667,NM_172684	mRNA			AK037774,AK046443						6727	2385	47732	52501	7	0.091	0	1.61	2		13	1	1	1		uc008qtw.1,uc008qtx.1	NM_172684	Rsbn1	round spermatid basic protein 1,rosbin	6101.66	0.947	1108.47				115.343	69.3136	44.3269	21.1529	22.3652	17.3757	26.6755	41.7494	0.695823	0.972332	0.249883	24.6096	137.544	13.995
IVGNm00384	AF012923,AK043009,NM_009517	mRNA		AK018559,NR_027966					NM_009517		7782	870	23153	30872	6	0.249	0	0.784	4		10	1	1			uc008owc.1	NM_009517	Zmat3	wild-type p53-induced gene 1	2228.57	0.287	1033.15				36.3604	27.7998	46.5057	37.339	32.4079	13.225	11.5407							9.414
IVGNm00385	AK043022	ncRNA				AK122433,BC005523,BC098461,NM_001163387,NM_138666	AK122433				3476			3476		1	0		3		16			1						179.202	0.052	-31.7015																	4.829
IVGNm00386	AK016716,AK043194,AK212331,BC147485,BC151028,NM_028925	mRNA		NM_026406							2199	1602	13749	15948	14	0.064	0.396	10.989			1		1	1		uc008qoa.1,uc008qob.1		Polr3c	RIKEN full-length enriched library, clone:4933407E01 product:SIMILAR TO POLYMERASE (RNA) III (DNA DIRECTED) (62KD) homolog [Homo sapiens], full insert sequence.,DNA-directed RNA polymerase III subunit C (EC 2.7.7.6) (DNA-directed III 62 kDa polypeptide) (RNA polymerase III C62 subunit) (RPC3).,Mus musculus adult male testis cDNA	1624.23	0.968	2240.47				211.982	217.661	244.394	178.953	116.136	62.2369	54.3479	437.742	7.29571	0.913775	0.0488546	180.312	-1023.48	8.413
IVGNm00387	AK043341	ncRNA				AK122433,BC098461,NM_001163387,NM_138666	AK122433				3534			3534		1	0		1		10				1					505.607	0.143	-1.6658																	8.224
IVGNm00388	AK043384,AK085325	ncRNA						AF033003			1383		24027	25410	3	0.054	0	2.169			1		1	3		uc008pkm.1		AK085325	RIKEN full-length enriched library, clone:A730090N16 product:unclassifiable, full insert sequence.,Mus musculus 7 days neonate cerebellum cDNA	231.038	0.191	-74.9966				73.7415	71.1368	63.6697	50.3715	46.3906	28.3127	25.5276	332.217	5.53694	0.983057	0.0248918	214.048	741.662	6.301
IVGNm00389	AF326561,AF326562,AK035210,AK043424,AK044370,AK134970,AK139337,BC018385,NM_019535,U58886	mRNA									3231	1293	430496	433727	11	0.006	0.227	7.168	1		8	1	1	1		uc008tlo.1	NM_019535	Sh3gl2	SH3-domain GRB2-like 2	1895.63	0.971	1799.9																	5.33
IVGNm00390	AK043496	ncRNA	TRUE								1909		482585	484494	10	0.004	0	5.238			4		1	1						87.407	0.046																		15.822
IVGNm00391	AK043613	ncRNA	TRUE								921		40331	41252	2	0.022	0	2.172			2		1	1		uc008rpj.1		AK043613	RIKEN full-length enriched library, clone:A830012D13 product:unclassifiable, full insert sequence.,Mus musculus 10 days neonate cortex cDNA	443.67	0.482	2.2305																	5.742
IVGNm00392	AK043679,AK086499	ncRNA	TRUE								3540		13290	16830	3	0.193	0	0.847			6		1	1		uc008rpi.1		AK043679	RIKEN full-length enriched library, clone:A830019L24 product:unclassifiable, full insert sequence.,Mus musculus 10 days neonate cortex cDNA	460.797	0.13	-24.2476
IVGNm00393	AK043701	ncRNA				AF190645,AK032317,AK080619,BC108988,BC108989,FJ207475,FJ207476,NM_019510	AK032317				1134			1134		1	0				5									160.208	0.141	-148.117																	8.116
IVGNm00394	AK043872	ncRNA	TRUE								2833			2833		1	0		1		4		1	1						813.805	0.287	-167.673			Sox2ot														4.413
IVGNm00395	AK043943,AK129248,BC026986,BC076603,NM_029570	mRNA									4864	3525	97275	102139	29	0.046	0.612	6.126			16	2	1			uc008oyt.1,uc008oyu.1	NM_029570	Atp11b	Class VI, type 11B,ATPase	4059.17	0.836	1306.88				57.182	50.807	75.8638	65.0666	65.178	42.2607	48.188							11.517
IVGNm00396	AK044064	ncRNA	TRUE								2195		3534	5732	2	0.383	0	0.911			5									635.616	0.29	-74.3745																	5.911
IVGNm00397	AK017931,AK044073,AK052584,AK153576,BC092543,NM_029086	mRNA		AK087220							2129	1467	10891	12916	5	0.125	0.585	3.209			5	1		1		uc008stp.1,uc008stq.1	NM_029086	5830415F09Rik	hypothetical protein LOC74753	663.222	0.429	530.123				308.222	274.337	89.1994	35.631	23.9124	19.6384	22.4456	66.161	1.10268	0.982593	0.117906	43.5048	138.059	9.466
IVGNm00398	AK044373	ncRNA	TRUE					AK054291			2306			2310		1	0		2		5				5					122.066	0.053	-22.3524																	12.905
IVGNm00399	AK044441	mRNA		AK012829							1975	1626	90942	92917	9	0.021	0.823	4.557			2									1114.01	0.564	389.153				54.5022	48.2233	51.7069	35.5916	33.5675	22.0073	21.2343	311.75	5.19583	0.936026	0.0519399	149.809	-3849.43	8.878
IVGNm00400	AK044447	ncRNA		AK008265							1726		15846	17572	3	0.098	0	1.738					1	1		uc008qlk.1		AK044447	RIKEN full-length enriched library, clone:A930013N02 product:hypothetical protein, full insert sequence.,Mus musculus adult retina cDNA	207.155	0.12	3.1735																	6.901
IVGNm00401	AK044509,AK147615	mRNA	TRUE	AK015763						AK015763	6841			6844		1	0				9		1	1						760.068	0.14	119.802																	5.176
IVGNm00402	AK020793,AK044583	ncRNA	TRUE								1581		30161	31527	4	0.043	0	2.53	1		2		1	1		uc008oqu.1		AK020793	RIKEN full-length enriched library, clone:A930001A20 product:unclassifiable, full insert sequence.,Mus musculus adult retina cDNA	97.895	0.062
IVGNm00403	AK044625	ncRNA				AK122433,BC098461,NM_001163387,NM_138666	AK122433				1794			1794		1	0				4									159.177	0.089																		5.938
IVGNm00404	AK044927,AK050520,AK146815,AK150687,AK152084,AK199670,BC002051,NM_011317,U17046,U17961	mRNA									3738	1332	36534	38546	11	0.052	0.324	5.467	2	1	5	1	2	1		uc008uyc.1,uc008uyd.1	NM_011317	Khdrbs1	RNA binding, signal,KH domain containing	3264.57	1.004	1135.98				330.175	289.307	366.207	282.675	142.902	56.5289	45.8544	457.556	7.62593	0.891234	0.054254	172.191	-696.165	10.451
IVGNm00405	AK045011	mRNA									3289	845		3291		1	0.257		1	1	3		1							393.742	0.12	166.8
IVGNm00406	AK030251,AK036227,AK045063,AK134641,AK147824,BC060136,NR_015459	mRNA		AK002750,AK028098				AK136584			5407	1858	1970	7364	3	0.658	0	0.785	1		8	5				uc008qxp.1,uc008qxq.1,uc008qxr.1		4933431E20Rik,AK030251,AK036227,BC060136	RIKEN full-length enriched library, clone:4933431E20 product:unclassifiable, full insert sequence.,Mus musculus adult male testis cDNA	511.464	0.166	45.5396																	9.995
IVGNm00407	AK006827,AK045082,AK137080,AK137471,AK164465,BC026785,BC057940,L29479,L29480,NM_011495	mRNA									3547	2775	13467	16933	15	0.189	0.397	4.82	1	1	9	3	2	4	8	uc008pbm.1,uc008pbn.1,uc008pbo.1	NM_011495	Plk4	Serine/threonine-protein kinase PLK4 (EC 2.7.11.21) (Polo-like kinase 4) (PLK-4) (Serine/threonine-protein kinase Sak) (Serine/threonine- protein kinase 18).,polo-like kinase 4	2487.09	0.806	-9.5797				171.604	149.686	105.261	53.795	45.0294	25.7235	32.9502	113.704	1.89507	0.989702	0.0503962	82.2425	184.151	7.713
IVGNm00408	AK045085,NM_029967	mRNA									7839	5259	366629	374468	27	0.016	0.389	3.444			9	2			6	uc008tlr.1		Adamtsl1	ADAMTS-like protein 1 precursor (Punctin-1).	5312.08	0.678	4867.86																	5.825
IVGNm00409	AK016661,AK045097	ncRNA		NM_024461					BC096383		1390		57997	59387	6	0.018	0	6.51			1		1		9	uc008rew.1		AK016661	RIKEN full-length enriched library, clone:4933405D12 product:unclassifiable, full insert sequence.,Mus musculus adult male testis cDNA	71.215	0.051					27.5921	21.0983	26.9381	13.1114	16.8294	8.29752	13.9943							6.691
IVGNm00410	AK045570,AK134772,AK162580,AK163906,BC066193,NM_001083806,NM_013540	mRNA							BC048248		6997	2649	111015	117856	17	0.055	0.012	2.43	3		19		1	1		uc008pnz.1,uc008poa.1,uc008pob.1,uc008poc.1	NM_001039195,NM_001083806,NM_013540	Gria2	AMPA 2 isoform, ionotropic,glutamate receptor	4878.99	0.697	2219.86																	5.276
IVGNm00411	AK034145,AK045658,AK086248	mRNA		AK043640,AK045513			AK034145				3711	699	2070042	2072514	14	0.001	0	6.079	1	1	7	4	1	1		uc008tjp.1		Ptprd	D., receptor type,Protein tyrosine phosphatase	1809.29	0.732	549.558																	5.921
IVGNm00412	AK045938,AK163199	ncRNA				AK031655,AK034558,AK035038,AK141181,AK142411,AK142974,AK164239,BC115772,NM_009472,U72634	AK035038				2249			2249		1	0		1		6									59.07	0.048	10.748
IVGNm00413	AK032443,AK046405	ncRNA	TRUE								2094			2094		1	0		1		5				9					186.493	0.089	31.7551																	4.502
IVGNm00414	AK046449,AK081215	ncRNA			AK135894				NM_001163455		2762			2765		1	0		1		5		1							245.117	0.099	40.252				92.4638	65.8573	62.8992	33.9756	26.1595	14.3758	14.4832	152.176	2.53627	0.953979	0.0814021	83.2938	879.519
IVGNm00415	AK046489	ncRNA			BC118949						1958		1057	3015	2	0.649	0	1.021												392.635	0.201	13.9649																	5.87
IVGNm00416	AK047109	ncRNA				AK122433,BC005523,BC098461,NM_001163387,NM_138666	AK122433				3614			3614		1	0				6									133.596	0.037	-132.333																	5.316
IVGNm00417	AK047191	mRNA		AK140446							2551		140	2691	1	0.948	0	0.392			4									969.875	0.38	6.5218																	6.068
IVGNm00418	AJ505005,AK009584,AK047257,AK165758,AK209549,AK216260,AK220227,BC004769,BC059089,BC067250,NM_001163570,NM_027148	mRNA		NM_025442	AK171787		AK009584			AK003818,AK005296,AK006206,AK011159,AK030567,AK161187,BC027160,NM_025442	2315	840	5416	6714	10	0.144	0	18.692			11	3	1	1		uc008pfq.1	NM_027148	Exosc8	CBP-interacting protein 3	1027.83	1.026	652.499				1616.94	1964.51	1329.38	1001.11	510.42	315.334	322.408	210.742	3.51237	0.948247	0.0641576	110.763	2164.46	9.993
IVGNm00419	AK047315	ncRNA			AK135395			AK142974			1159		18853	20012	2	0.058	0	1.726			3									359.903	0.311																		8.089
IVGNm00420	AK035904,AK047534	ncRNA						AY792594			3221		2993	6214	2	0.518	0	0.82			4		1	1		uc008qqn.1		AK047534	RIKEN full-length enriched library, clone:9630016K09 product:unclassifiable, full insert sequence.,Mus musculus 16 days neonate cerebellum cDNA	167.043	0.052	21.4416																	5.553
IVGNm00421	AK047601,BC037070,NM_153158	mRNA									3205	2211	91954	95159	2	0.028	0.69	0.764			5	3	1	1		uc008taa.1	NM_153158	E130308A19Rik	hypothetical protein LOC230259 isoform 1	2517.26	0.897	5881.76				40.1283	36.5418	28.7667	19.0511	18.15	11.2489	14.5143	133.788	2.22981	0.975588	0.0664176	83.9737	328.894	8.099
IVGNm00422	AK047642	ncRNA	TRUE								2742		1829	4571	1	0.6	0	0.365			5									129.452	0.047	18.0496																	7.381
IVGNm00423	AK047699	ncRNA				AK122433,BC005523,BC098461,NM_001163387,NM_138666	AK122433				1965			1966		1	0				5				2					733.56	0.373	-180.201																	5.911
IVGNm00424	AK040741,AK047674,AK048101,AK084338,AK164170,AK169469,BC063049,BC080683	mRNA		NM_027315		X51976	X51976			AK146707,AY112699,AY945937,BC082275,NM_027315	4663			4663		1	0				11		1	2		uc008qac.1		AK040741	RIKEN full-length enriched library, clone:A530022C24 product:unclassifiable, full insert sequence.,Mus musculus adult male aorta and vein cDNA	766.143	0.164	57.3332	TRUE
IVGNm00425	AK048145	ncRNA				AK031655,AK141181,AK142411,AK142974,AK164239,BC115772,NM_009472,U72634	AK142974				2612			2612		1	0		1		7			1						278.141	0.106	-36.9017																	6.21
IVGNm00426	AK048157,NM_030595,Y18276.2	mRNA									10983	8808	547521	558504	57	0.02	0.165	5.19	3	1	17	4	1	1		uc008pgw.1,uc008pgx.1		Nbea,nbea	RIKEN full-length enriched library, clone:C130038A22 product:neurobeachin, full insert sequence.,Mus musculus 16 days embryo head cDNA	10319.8	0.94	589.087				34.3809	78.2997	85.7104	78.8463	58.7903	24.3906	30.2558							7.971
IVGNm00427	AK048372	ncRNA				AK122433,BC005523,BC098461,NM_001163387,NM_138666	AK122433				3122			3122		1	0		3		23									240.154	0.077	-4.5507																	5.855
IVGNm00428	AK048436	ncRNA				AB032591,AK039764,AK044552,AK083141,NM_001163516,NM_021483	NM_001163516	AK015168			3801			3803		1	0				7				7					462.624	0.122	8.0787																	5.306
IVGNm00429	AK048445	ncRNA				AB016795,AK135092,AK144703,BC005616,BC054395,BC063104,NM_015728	BC063104				2225		3849	6074	1	0.366	0	0.449			5			1						211.298	0.095	-12.986																	8.557
IVGNm00430	AK048575,AK083909,AK157801,BC098205,NM_001162375,NM_174868	mRNA							AK044739		5162	1800	61786	66948	15	0.074	0.38	3.032	1		9		1	1		uc008rte.1	NM_174868	C030011O14Rik,Fam73a	hypothetical protein LOC215708	2167.39	0.457	1108.84
IVGNm00431	AK045030,AK048795,NM_028712	mRNA		AK046664					NM_028712		4197	1012		4197		1	0				5		1	1		uc008pjl.1	NM_028712	Rap2b	member of RAS oncogene family,RAP2B	2148.69	0.533	827.407																	8.487
IVGNm00432	AK048871	ncRNA	TRUE								1512		516	2028	1	0.746	0	0.661			3		1							115.186	0.076	-56.9532																	6.249
IVGNm00433	AK043761,AK049102	ncRNA	TRUE								1194		1943	3137	1	0.193	0	2.151	1		3		1			uc008pol.1		AK049102	RIKEN full-length enriched library, clone:A830029E22 product:unclassifiable, full insert sequence.,Mus musculus 10 days neonate cortex cDNA	19.084	0.029	-35.8244																	7.051
IVGNm00434	AK033169,AK049273,NM_001079830,NM_053170	mRNA									8868	3420	70659	79476	19	0.111	0	2.143	3	1	21	3	1			uc008qsv.1,uc008qsw.1	NM_001079830,NM_053170	Trim33	tripartite motif protein 33 isoform 1,tripartite motif protein 33 isoform 2	6079.79	0.686	1629.33				56.678	31.7125	28.2395	13.5251	12.6129	5.12494	7.71081	79.5678	1.32613	0.914386	0.220584	36.6381	-463.353	5.231
IVGNm00435	AK049712	ncRNA	TRUE								3976			3980		1	0		1		4		1							1042.65	0.262	21.7006	TRUE																5.703
IVGNm00436	AK031616,AK034655,AK050064,AK083882,AK084838,AK144209,AK150350,AK150669,AK151392,AK151862,AK159548,NM_145393	mRNA									2937	1752	23263	26200	4	0.053	0.6	1.467			4		1	1		uc008vas.1	NM_145393	Ythdf2	high glucose-regulated protein 8	2878.42	0.985	773.597				1273.28	997.32	311.772	186.309	154.71	135.774	124.605	52.6774	0.877956	0.991935	0.103467	38.6237	82.808	7.879
IVGNm00437	AK050194,AK149452	ncRNA				BC089581,M77015,NM_001012306,NM_001161742,NM_001161743,NM_001161744,NM_001161745	NM_001161744				4843			4843		1	0		1		9									47.187	0.01																		14.16
IVGNm00438	AK050308,AK050357,NM_145368	mRNA									1659	1263	26648	28307	4	0.056	0.759	2.538								uc008svq.1	NM_145368	C730036D15Rik	hypothetical protein LOC209186	363.254	0.228	394.874																	7.334
IVGNm00439	AK050308,AK050357,BC010829,DQ469311,EU564338,NM_001164565,NM_145368	mRNA									5048	1263	26648	28307	4	0.056	0.247	2.538			4		1	1		uc008svq.1,uc008svr.1	NM_145368	Acnat1,C730036D15Rik	Acyl-CoA:N-acyltransferase 1 (EC 2.3.1.-).,hypothetical protein LOC209186	437.81	0.34	1267.93
IVGNm00440	AK050456,AK088719,AK146458,BC023934,NM_001172092,NM_001172093,NM_029523	mRNA									3323	2418	32031	34523	11	0.057	0.637	5.208	1		10	1	1			uc008rvy.1,uc008rvz.1,uc008rwa.1	NM_029523	Depdc1a	DEP domain containing 1a	2151.31	0.816	346.083				100.494	56.2979	74.0369	37.793	22.7134	11.1311	13.0834	183.089	3.05149	0.862347	0.124546	72.5877	-350.531	5.646
IVGNm00441	AK050464	ncRNA	TRUE					AK034519			1957		11196	13153	2	0.149	0	1.022			2		1	2		uc008rku.1		AK050464	RIKEN full-length enriched library, clone:C820001A03 product:unclassifiable, full insert sequence.,Mus musculus adult pancreas islet cells cDNA	20.609	0.011	-253.549																	7.152
IVGNm00442	AK050480,AK050510	ncRNA							AK132634		2312		13908	16220	1	0.143	0	0.433			4			1		uc008pez.1		AK050510	RIKEN full-length enriched library, clone:C820002H21 product:unclassifiable, full insert sequence.,Mus musculus adult pancreas islet cells cDNA	179.84	0.078	-11.9623																	5.67
IVGNm00443	AF095718,AK041655,AK050624,AK050650,AK135738,AK137348,BC010255,NM_019550	mRNA									3427	1596	61286	64713	13	0.039	0.419	5.227			13	1	1	2		uc008rdj.1,uc008rdk.1,uc008rdl.1	NM_019550	Ptbp2	polypyrimidine tract binding protein 2	3400.25	0.993	821.703				69.3136	46.081	70.6451	59.8848	50.9918	32.4362	41.6983							7.512
IVGNm00444	AK050678,AK161914,BC050266,NM_001165954,NM_001165955,NM_001165956	mRNA							AK166296		11051	2979	59196	70121	15	0.156	0	1.373			17		1	1				Phc3		4499.09	0.998	2181.09				275.058	222.984	160.261	101.569	71.9075	50.0929	41.7899	120.738	2.0123	0.993914	0.0363843	93.3587	170.841
IVGNm00445	AF217000,AF220454,AJ250027,AK050950,AK154518,BC125471,BC137721,NM_017397	mRNA									2895	2478	6400	9296	10	0.297	0.442	3.69			7		1	1		uc008qva.1,uc008qvb.1	NM_017397	Ddx20	DEAD (Asp-Glu-Ala-Asp) box polypeptide 20	2074.58	0.74	851.871				239.135	213.702	98.8626	35.8656	21.5714	11.4518	15.5919	84.2946	1.40491	0.991386	0.0630895	62.2085	130.696	6.548
IVGNm00446	AK051109	mRNA									2573	492	262642	265215	3	0.01	0.191	1.166	1		11	2								419.411	0.163	-138.263																	7.232
IVGNm00447	AK051240,AK171126	mRNA					AK052409				2759		634	2988	1	0.788	0	0.426			2									754.105	0.273	105.94				2195.66	2077.02	1932.46	1672.24	1261.27	996.23	1049.36	253.951	4.23251	0.986107	0.0277594	172.683	479.715	5.511
IVGNm00448	AK029901,AK030438,AK051259,AK129359,AK145085,BC003236,BC006952,EF410090,NM_001163332,NM_001163333,NM_030249	mRNA									4838	1914	46286	51039	5	0.05	0.139	5.391	1		9		1			uc008quu.1,uc008quv.1	NM_030249	Cttnbp2nl	CTTNBP2 N-terminal like	2939.9	0.965	3748.86				49.2121	59.3297	29.8411	17.3333	16.1464	16.6073	17.4687	89.6481	1.49414	0.889967	0.222687	38.4302	-269.416	7.956
IVGNm00449	AK041160,AK051472,AK172987,NM_207109	mRNA									4831	4056	1018930	1023681	23	0.004	0.465	5.402			7	1	1		4	uc008thn.1,uc008thp.1,uc008tht.1	NM_207109	Astn2	astrotactin 2 isoform b	4327.14	0.938	4906.65				57.5708	53.1061	52.4322	35.0234	20.6288	23.6242	16.965	207.264	3.4544	0.940816	0.069904	105.357	6328.45	6.475
IVGNm00450	AK051554	ncRNA							AK051312		3049			3052		1	0				9				9					557.234	0.183					39.1034	25.1699	21.6861	10.9605	10.6291	5.66494	10.7985	78.1711	1.30285	0.928265	0.204345	37.8295	-1177.14	7.041
IVGNm00451	AK051588	ncRNA				AB093234,AF155819,AF155820,AF155821,AK032424,AK047716,AK081200,AY968047,AY968048,BC133685,NM_001111051,NM_001111052,NM_001195538,NM_001195539,NM_019978	NM_001195538				1527			1528		1	0				4			1						270.017	0.177																		6.767
IVGNm00452	AK051772	ncRNA				AK031655,AK034558,AK035038,AK141181,AK142411,AK142974,AK164239,BC115772,NM_009472,U72634	AK035038				4687			4687		1	0				12									749.18	0.16	-0.634																	15.143
IVGNm00453	AK051799	ncRNA				AK122433,BC005523,BC098461,NM_001163387,NM_138666	AK122433				1486			1488		1	0		1		1			1						343.656	0.231	10.1737																	5.314
IVGNm00454	AK020473,AK051836,AK122286,BC033477,BC034266,BC050783,NM_178080	mRNA									6200	3354	22971	29171	16	0.175	0.542	3.292			4	1	2	2		uc008qpg.1	NM_178080	Pde4dip	phosphodiesterase 4D interacting protein isoform	3383.13	0.547	4446.35				349.136	306.59	240	148.748	104.581	60.4313	57.0535	161.82	2.697	0.995527	0.0234367	129.127	216.681	6.716
IVGNm00455	AF472514,AK029694,AK038671,AK051947,AK133397,AK161578,AK161718,BC080732,NM_145711	mRNA									2780	1578	300486	303266	8	0.006	0.183	4.77	1		7	2	1	4	6	uc008rxs.1,uc008rxt.1,uc008rxu.1	NM_145711	Tox	complete cds.,Mus musculus thymus high mobility group box protein TOX (Tox) mRNA,thymocyte selection-associated HMG box	2653.79	0.958	2330.52				43.6132	40.1415	51.5758	33.8916	30.643	16.9778	11.6562	654.057	10.901	0.873263	0.0510398	202.581	-532.349	7.91
IVGNm00456	AK052098	ncRNA				AK043424,AK044374	AK043424				2162		79072	81234	1	0.027	0	0.463							1					86.232	0.04																		5.516
IVGNm00457	AK052161	ncRNA							AK155517		550		3130	3680	1	0.149	0	1.818			1		1			uc008qne.1		AK052161	RIKEN full-length enriched library, clone:D330001M19 product:unclassifiable, full insert sequence.,Mus musculus 13 days embryo heart cDNA	184.062	0.335	-262.599				274.73	289.566	263.829	266.388	226.953	195.733	162.025	769.08	12.818	0.972878	0.0214031	366.42	-7775.85	6.771
IVGNm00458	AK052159,AK052179,NM_175413	mRNA			BC127174			AK163561	AK039277		3043	1011	17070	20113	8	0.151	0	2.629	1		9	1	1			uc008rci.1	NM_175413	Lrrc39	leucine rich repeat containing 39 isoform 2	1658.03	0.545	500.769																	5.369
IVGNm00459	AK040399,AK041307,AK041403,AK042009,AK052452,AK139858,AK145184,BC110553,NM_008371,X07962	mRNA		AK151815							4260	462	38876	41694	6	0.042	0.08	2.345			6	2	1	1		uc008ooh.1,uc008ooi.1,uc008ooj.1,uc008ook.1	NM_008371	Il7	RIKEN full-length enriched library, clone:A430091K05 product:interleukin 7, full insert sequence.,Mus musculus 0 day neonate thymus cDNA,interleukin 7	757.41	0.356	-219.572																	6.578
IVGNm00460	AK052668,AK086477,AK147816	mRNA					AK184553		AK011371		2386			2386		1	0				6		1	1		uc008rpu.1		AK086477	RIKEN full-length enriched library, clone:D630018A05 product:SH3-domain GRB2-like B1 (endophilin), full insert sequence.,Mus musculus 0 day neonate kidney cDNA	392.347	0.166	28.2669				78.223	66.6063	85.5425	73.0166	71.1731	57.0866	62.2451							5.928
IVGNm00461	AF263364,AF272946,AK052668,AK086477,AK147816,NM_019464	mRNA					AK184553		AK011371		4012	1158	27531	31480	10	0.125	0.277	2.493			8	1	1	1	7	uc008rpu.1,uc008rpv.1,uc008rpw.1	NM_019464	AK086477,Sh3glb1	RIKEN full-length enriched library, clone:D630018A05 product:SH3-domain GRB2-like B1 (endophilin), full insert sequence.,Mus musculus 0 day neonate kidney cDNA,SH3-domain GRB2-like B1	1685.38	0.42	570.423				319.594	294.881	315.053	268.308	240.376	233.342	168.544	864.856	14.4143	0.926339	0.0352575	284.898	-835.069
IVGNm00462	AK052681	ncRNA		AK204796							2669		2358	5027	1	0.531	0	0.375			7		1							627.873	0.235	-13.107																	9.675
IVGNm00463	AK052782	ncRNA				AK147159	AK147159				1453		35120	36574	4	0.04	0	2.753			1		1							80.216	0.055	-3.626																	12.701
IVGNm00464	AK052792	ncRNA						BC067017			1235		4075	5310	3	0.233	0	2.429			1		1	1		uc008qtn.1		AK052792	RIKEN full-length enriched library, adult female mammary gland cDNA, clone:D730005C15 product:unclassifiable, full insert sequence.,Mus musculus 10 days lactation	385.463	0.312																		6.193
IVGNm00465	AK052977	ncRNA	TRUE								1370		8246	9616	1	0.142	0	0.73			1									242.017	0.177	-21.6619																	6.55
IVGNm00466	AK053118,BC057546,NM_173347	mRNA		AK015696,AK180852							4609	1365	25263	28403	7	0.111	0	2.229	1		8		1		3	uc008qiz.1	NM_173347	Prune	PRUNEM1	1512.29	0.482	1691.03
IVGNm00467	AK020342,AK053118	mRNA		AK015696,AK180852			BC058635			AF051908,AK036838,AK087859,AK162551,AK169673,AK213681,BC094388,NM_133858,NM_199475	4609		3308	7917	1	0.582	0	0.217	1		8				3					918.066	0.226	18.9779																	6.465
IVGNm00468	AK053289	ncRNA				AK122433,BC098461,NM_001163387,NM_138666	AK122433				1214			1214		1	0													81.215	0.067																		6.899
IVGNm00469	AK053355	ncRNA				AB016795,AK144703,BC005616,BC054395,BC063104,NM_015728	BC063104				2213			2213		1	0		1		10									100.019	0.045																		9.501
IVGNm00470	AK053368	mRNA									2444	1197	82544	84988	10	0.029	0.49	4.092			2		1	1						1683.97	0.689	246.077																	5.501
IVGNm00471	AK034251,AK043762,AK047614,AK053451,AK087439,AK087514,AK160897,AK220568,AY345342,BC096762,NM_178756	mRNA									3762	975	277128	280800	7	0.005	0.238	4.749	2	1	5	2	1	1		uc008svo.1,uc008svp.1	NM_178756	E130309F12Rik,mKIAA4247	RIKEN full-length enriched library, clone:6030426F17 product:unclassifiable, full insert sequence.,Mus musculus 13 days embryo male testis cDNA,plasticity-related protein 3	1838.72	0.902	988.863																	7.732
IVGNm00472	AK053462	mRNA		NM_001142952							1408	470	32847	34255	2	0.041	0.334	1.42			1									40.747	0.029	-55.0245																	5.767
IVGNm00473	AK053466	ncRNA				AK122433,BC005523,BC098461,NM_001163387,NM_138666	AK122433				834			834		1	0				4									187.327	0.225																		6.73
IVGNm00474	AK053493	ncRNA				AK122433,BC005523,BC098461,NM_001163387,NM_138666	AK122433				3498			3498		1	0				8									647.929	0.185	-83.8562																	5.354
IVGNm00475	AK053528	ncRNA							U03279		3732			3735		1	0		1		6		1							1198.77	0.321	-9.0057
IVGNm00476	AK053539	ncRNA				AK122433,BC005523,BC098461,NM_001163387,NM_138666	AK122433				3719			3720		1	0		1		18				1					281.889	0.076	-9.6765																	7.697
IVGNm00477	AK053677	ncRNA					NM_138679	X51976			2893			2893		1	0				9									310.113	0.107	-13.724																	11.841
IVGNm00478	AK053807,NM_001081277	mRNA			AK136540						3103	1686	202223	205326	13	0.015	0.444	4.194			2	1	1	1		uc008rtq.1	NM_001081277	Ak5	adenylate kinase 5	1843.33	0.594	1330.92																	9.209
IVGNm00479	AK053821	ncRNA		AK053902			NM_001163304				3492			3497		1	0				4				8					199.192	0.057																		6.754
IVGNm00480	AK031747,AK053046,AK053837,AK079121,AK082728,AK084160,AK084308,AK140559,BC058413,NM_178777,S40532	mRNA									3943	2324	1996	5347	2	0.527	0.161	0.906	1	1	9	4	1	1		uc008qro.1,uc008qrp.1,uc008qrq.1	NM_178777	Nhlh2	nescient helix loop helix 2	2167.14	0.71	521.154																	6.747
IVGNm00481	AK054018	ncRNA									1623		5695	7318	3	0.222	0	1.848			2				6					191.524	0.118	-4.6783																	5.482
IVGNm00482	AK054525	ncRNA		BC049732					AK150089		3866		4516	8382	1	0.461	0	0.259			6			1						309.423	0.08	25.7054																	5.477
IVGNm00483	AK075734	ncRNA							AK138209		2989			2989		1	0				3		1	1	2					205.961	0.069	-18.6553																	4.787
IVGNm00484	AK075917,NM_080451	mRNA							NM_080451		7116	3771	152515	159631	4	0.045	0	0.728			7		1	1				Synpo2		2893.68	0.407	3721.63				91.5984	74.0509	73.5026	46.6696	32.9402	17.9277	24.1844	197.887	3.29812	0.961825	0.0578734	112.146	840.478	6.766
IVGNm00485	AK076046	mRNA									2194	876	18681	20877	14	0.105	0.399	6.381			2	1	1							1711.3	0.78	1771.36
IVGNm00486	AK018178,AK031683,AK032520,AK049888,AK076302,AK079560,AK160479,BC007185,NM_027533	mRNA		AK019118					BC007185		4243	663	33280	37523	7	0.082	0	2.345	2	1	12	2	1	2		uc008qrw.1	NM_027533	Tspan2	tetraspan 2	1103.01	0.35	836.121				665.533	581.232	605.805	493.806	389.208	318.326	237.175	392.258	6.53764	0.971266	0.0291731	222.375	1661.78	6.512
IVGNm00487	AK076492,BC089370	ncRNA							BC050193		1376		2711	4037	1	0.328	0	0.754			1		1	1						495.554	0.374	-152.149				222.08	192.633	196.099	160.203	119.669	72.396	49.339	427.332	7.1222	0.984156	0.0204526	269.869	1025.96	6.761
IVGNm00488	AK076759	ncRNA									353		38947	39300	2	0.009	0	5.666								uc008rde.1		AK076759	RIKEN full-length enriched library, clone:4930433N22 product:unclassifiable, full insert sequence.,Mus musculus adult male testis cDNA	197.778	0.56																		6.819
IVGNm00490	AK076817	ncRNA	TRUE								696		8874	9570	1	0.073	0	1.437			2		1			uc008sae.1		AK076817	RIKEN full-length enriched library, clone:4930483F24 product:unclassifiable, full insert sequence.,Mus musculus adult male testis cDNA	10.106	0.015																		6.723
IVGNm00491	AK076859	ncRNA	TRUE								785		41269	42054	4	0.019	0	5.096			1					uc008tss.1		AK076859	RIKEN full-length enriched library, clone:4930513I24 product:unclassifiable, full insert sequence.,Mus musculus adult male testis cDNA	41.217	0.053																		6.729
IVGNm00492	AK015673,AK076898,NM_001081096	mRNA		AK015482							1835	1428	111771	113606	3	0.008	0.516	3.155			3	1	1	1		uc008tlt.1,uc008tlu.1	NM_001081096	4930500O09Rik	RIKEN full-length enriched library, clone:4930543A14 product:RIKEN cDNA 4930500O09.,Adult male testis cDNA,hypothetical protein LOC75811	988.776	0.565	855.166				44.1454	43.7039	42.8637	34.7292	37.0002	19.3608	21.6599	475.95	7.9325	0.885641	0.0546953	173.838	-645.009
IVGNm00493	AK076898	mRNA		AK015482							634	327	76121	76755	2	0.008	0.516	3.155			1	1	1	1		uc008tlu.1		4930500O09Rik	RIKEN full-length enriched library, clone:4930543A14 product:RIKEN cDNA 4930500O09.,Adult male testis cDNA	223.551	0.353	12.8122																	5.523
IVGNm00494	AK076901	ncRNA	TRUE								914		2965	3879	2	0.236	0	2.188			1		1							148.379	0.162	-82.6718																	5.914
IVGNm00495	AK076933	ncRNA	TRUE								1068		2853	3921	3	0.272	0	2.809			1		1							245.598	0.23	12.4284																	12.781
IVGNm00496	AK076987	ncRNA		AK152536							661		5915	6576	1	0.101	0	1.513			2		1	1		uc008rvd.1		AK076987	RIKEN full-length enriched library, clone:4930592C13 product:unclassifiable, full insert sequence.,Mus musculus adult male testis cDNA	51.796	0.078																		6.068
IVGNm00497	AK077058	mRNA									3510	2196		3510		1	0.626				5	2	1	1						519.617	0.148	649.192																	4.959
IVGNm00498	AF532969,AK031356,AK043865,AK077112,AK173064,BC021749,BC031527,NM_138744	mRNA									3691	1848	32060	35496	14	0.096	0.499	4.458	1		2	1	1			uc008rrb.1,uc008rrc.1,uc008rrd.1,uc008rre.1	NM_138744	Ssx2ip	X breakpoint 2 interacting,synovial sarcoma	2410.94	0.851	1753.77				119.928	114.694	147.86	126.874	121.4	79.7954	72.5911	2094.04	34.9006	0.715781	0.0730475	186.771	-227.321	7.446
IVGNm00499	AK050545,AK077268,AK147866,BC082787,BC141404,NM_172696	mRNA									7305	5502	316473	323778	43	0.016	0.747	7.411			11	1	1	1		uc008tuc.1	NM_172696	Inadl	InaD-like protein isoform 1	4200.1	0.643	4105.72
IVGNm00500	AK077393,NM_001164763	mRNA			AK085855						1411	849	35227	36638	5	0.036	0.602	3.774			1		1	1		uc008plo.1		Rarres1	RIKEN full-length enriched library, clone:5430417P09 product:weakly similar to RETINOIC ACID RECEPTOR RESPONDER PROTEIN 1 (TAZAROTENE-INDUCED GENE 1 PROTEIN) (RAR- RESPONSIVE PROTEIN TIG1) (Fragment).,6 days neonate head cDNA	523.081	0.394	443.515																	6.514
IVGNm00501	AK077483	ncRNA				AK158073,BC024837,NM_145922	BC024837				4976			4976		1	0				6				8					411.581	0.083	-20.7146																	5.137
IVGNm00502	AK077587,AK136335	ncRNA		NM_057172		AK006478,NM_027287	NM_027287				2576			2576		1	0				8		1	2		uc008rss.1		AK077587	RIKEN full-length enriched library, clone:A630051B20 product:unclassifiable, full insert sequence.,Mus musculus 3 days neonate thymus cDNA	60.886	0.024	14.028																	6.47
IVGNm00503	AK077796,BC108990,EF494422,M55544,M63961,NM_010259	mRNA									2820	1767	115879	118614	10	0.02	0.6	3.724			1		1	1		uc008ror.1,uc008rox.1	NM_010259	Gbp1	guanylate nucleotide binding protein 1	745.107	0.302	1110.98																	6.268
IVGNm00504	AK019542,AK039832,AK077870,AK147305,BC013814,BC034101,NM_026641	mRNA		AK152804					AK129339		7614	2331	107982	112059	19	0.036	0	4.781	1		15	5	1			uc008plw.1,uc008plx.1	NM_026641	Ift80	WD repeat domain 56	2964.3	0.622	1359.3																	5.194
IVGNm00505	AK077932	ncRNA	TRUE								3110			3110		1	0				3		1	1						322.977	0.104	11.0321																	6.008
IVGNm00506	AK031446,AK033824,AK076908,AK077940,BC034092,BC066840,NM_008604	mRNA							NM_008604		4453	2253	82191	86644	22	0.043	0	5.96	1		6	1		1		uc008pjp.1,uc008pjq.1,uc008pjr.1	NM_008604	Mme	membrane metallo endopeptidase	2496.43	0.662	1652.28																	5.337
IVGNm00507	AK035918,AK077976,AK152728,AK153164,AK154392,BC025800,NM_001163489,NM_001163490,NM_001163491,NM_013658,X85991	mRNA									3211	2285	22175	25224	14	0.121	0.574	4.596	1		1	1	1			uc008pvg.1,uc008pvh.1,uc008pvi.1	NM_013658	Sema4a	(semaphorin) 4A, RIKEN full-length enriched library, clone:9630018D15 product:sema domain, full insert sequence., immunoglobulin domain (Ig), transmembrane domain (TM) and short cytoplasmic domain,Mus musculus 16 days neonate cerebellum cDNA,sema domain	1862.49	0.59	2081.21				70.4006	59.1175	73.073	71.8075	69.5466	48.2519	73.0566							10.786
IVGNm00508	AK078012	mRNA					NM_001159630				1759		41576	43335	1	0.041	0	0.569			8			2						405.655	0.231	-14.9864																	4.683
IVGNm00510	AK078227	ncRNA				AK122433,BC005523,BC098461,NM_001163387,NM_138666	AK122433				1124			1124		1	0				2			1						98.538	0.088	-21.4989																	5.977
IVGNm00511	AK078352	ncRNA									1204		170	1374	1	0.876	0	0.831			1		1			uc008pwd.1		AK078352	RIKEN full-length enriched library, clone:6530404K14 product:unclassifiable, full insert sequence.,Mus musculus 10 days neonate cerebellum cDNA	247.872	0.206	-14.5078																	5.811
IVGNm00512	AK078359	ncRNA				AK122433,BC005523,BC098461,NM_001163387,NM_138666	AK122433				1170			1170		1	0				1									43.076	0.037	-109.869																	13.138
IVGNm00513	AK078431	mRNA							NM_172525		1721			1721		1	0		1		9									531.058	0.309	-222.677																	4.771
IVGNm00514	AK078431,BC031572,BC040387,BC052858,NM_172525	mRNA							NM_172525		5090	3801	57738	62828	22	0.065	0	4.322	2	1	16			1		uc008reh.1,uc008rek.1	NM_172525	Arhgap29	Rho GTPase activating protein 29	3459.13	0.68	2657.99
IVGNm00515	AK078559	ncRNA				AB093234,AF155819,AF155820,AK043874,AK147831,AK164993,AK199211,BC021354,BC050903,BC064783,BC133685,NM_001111053,NM_001195538,NM_019978	AK147831				2270			2270		1	0				9									145.807	0.064	-23.3131																	7.466
IVGNm00516	AK078702	ncRNA	TRUE								1789		1440	3229	1	0.554	0	0.559			2									128.855	0.072	7.4462				29.9736	24.2368	27.7267	22.1161	21.0323	12.3983	12.256	461.13	7.6855	0.898386	0.0520195	177.262	-766.75	10.304
IVGNm00517	AK078983	ncRNA				AK088000,AK137001,AK147554,AK148989,AK150523,AK159279,AK159306,AK184167,AK189977,AK192395,AK197377,AK197675,AK200318,AK200443,AK201233,AK201321,AK202370,AK202506,AK203618,AK204336,AK204406,BC010319,BC021496,BC023175,BC023794,BC023867,BC023964,BC025037,BC025618,BC025627,BC025811,BC029190,BC030326,BC031176,BC031389,BC032187,BC033435,BC033471,BC034177,BC035352,BC042435,NM_144900	BC023867			AK177206	752			752		1	0													2.514	0.003	-97.9697				26.7062	9.8061	13.5343	9.7354	12.1696	7.62767	10.5849	1.05095	0.0175159	0.912879	NA	NA	NA	7.273
IVGNm00518	AK079061,AK220331,NM_001004177,NM_017392	mRNA									10543	8757	14246	24647	33	0.338	0.28	4.739	1	1	3	1				uc008qyx.1,uc008qyy.1	NM_001004177,NM_017392	Celsr2	cadherin EGF LAG seven-pass G-type receptor 2	9329.07	0.886	13590.3				105.906	77.9243	82.1051	48.9117	36.6812	19.7542	20.3353	204.364	3.40607	0.945386	0.0678345	106.137	2742.52	11.744
IVGNm00519	AK079063	mRNA	TRUE								2001		110	2112	1	0.948	0	0.5			1		2	2						201.891	0.101	72.2788																	4.764
IVGNm00520	AK079211	ncRNA									2458		4498	6956	4	0.353	0	1.627			5		1							295.14	0.12	12.9579																	5.908
IVGNm00521	AK009144,AK079266,BC002046,NM_001162425,NM_010107,U26188,U90662	mRNA									1473	618	7775	9222	4	0.103	0.294	5.405	1	1			1	1		uc008pyo.1,uc008pyp.1	NM_010107	Efna1	ephrin A1	901.553	0.825	883.02																	8.819
IVGNm00522	AB221636,AF165911,AK079817,AK149897,AK166911,BC039796,BC057116,BC059240,NM_009210	mRNA		AK042086,AK085888							4955	3012	56444	60566	24	0.051	0.166	7.973	1		13	2	2	1		uc008osl.1,uc008osm.1,uc008osn.1	NM_009210	Hltf	actin, clone:V01Y037E15., matrix associated, strain=C57BL/6J),(tissue_type=testis,Mus musculus cDNA pooled tissues:(tissue_type=brain,SWI/SNF related,dev_stage=8-12 days neonate,dev_stage=adult,strain=BALB/c)	3352.33	0.928	610.627				107.619	88.9398	115.744	83.2721	59.0177	25.9369	23.9176	471.281	7.85468	0.890534	0.0536295	175.372	-685.684	8.225
IVGNm00523	AK080198,BC004805,NM_001039090,NM_011386	mRNA							NM_001039090		6717	2025	20938	27517	6	0.239	0	0.912	3	1	18	3	1			uc008ovu.1,uc008ovv.1	NM_001039090,NM_011386	Skil	SKI-like isoform a,SKI-like isoform b	3440.39	0.525	2666.7				63.2559	47.9951	41.096	16.9438	16.0065	9.48653	11.8693	112.297	1.87161	0.961147	0.100602	64.016	456.862
IVGNm00524	AK080394	mRNA						AK047743			1499	1074	14683	16182	2	0.093	0.716	1.334	1	1	2	1	1	1		uc008pip.1	NM_032399	Gpr87	G protein-coupled receptor 87	889.059	0.593	2918.84																	5.573
IVGNm00525	AK080487	ncRNA				AK031655,AK034558,AK035038,AK141181,AK142411,AK142974,AK164239,BC115772,NM_009472,U72634	AK035038				1277			1277		1	0				1									191.487	0.15	-5.62																	6.161
IVGNm00526	AK080594,AK080691	ncRNA				AK122433,BC005523,BC098461,NM_001163387,NM_138666	AK122433				1860			1862		1	0				6				9					76.337	0.042	-8.6351																	5.258
IVGNm00527	AK033061,AK080657	ncRNA	TRUE								765		46480	47245	2	0.016	0	2.614			2					uc008osu.1,uc008osv.1		AK033061,AK080657	RIKEN full-length enriched library, clone:7530428D23 product:weakly similar to EPHRIN TYPE-A RECEPTOR 5 PRECURSOR (EC 2.7.1.112) (TYROSINE-PROTEIN KINASE RECEPTOR EHK-1) (EPH HOMOLOGY KINASE-1) (BRAIN-SPECIFIC KINASE) (CEK-7) [Mus musculus], full insert sequence.,Mus musculus adult male eyeball cDNA	6.326	0.01																		6.811
IVGNm00528	AK080704	ncRNA	TRUE								1289		118	1410	1	0.916	0	0.776						2						531.001	0.412	-241.158																	6.9
IVGNm00529	AK080727	ncRNA	TRUE								961		3375	4336	2	0.222	0	2.081			1			1						166.63	0.173					25.5989	20.1057	25.175	23.1848	19.7205	12.4479	21.638							6.575
IVGNm00530	AK016619,AK030203,AK031605,AK037723,AK081238,AK164895,AK173315,BC103802,NM_025978,NM_027619	mRNA			BC156763,NM_026222				AK173315		11314	2298	7166	16444	11	0.564	0	1.169	3	1	25	1	1	1	5	uc008oxa.1,uc008oxc.1,uc008oxd.1,uc008oxe.1,uc008oxf.1,uc008oxg.1	NM_025978,NM_027619	Ttc14	Tetratricopeptide repeat protein 14 (TPR repeat protein 14).,tetratricopeptide repeat domain 14 isoform a,tetratricopeptide repeat domain 14 isoform b	3582.72	0.323	963.734				42.9739	35.9516	44.9197	34.7639	34.5014	21.0045	22.7122	530.552	8.84254	0.796243	0.0732171	147.65	-332.989	6.437
IVGNm00531	AF089739,AF145286,AF299083,AF325349,AK049722,AK051742,AK081254,AY574267,BC065103,NM_009602	mRNA			AK032321,AY509126						5337	2181	14932	18409	5	0.157	0.282	8.929			4	2			4	uc008qaa.1	NM_009602	Chrnb2	neuronal nicotinic acetylcholine receptor beta	1554.03	0.987	2174.51																	6.039
IVGNm00532	AK039918,AK081263	ncRNA									2948		31357	34170	3	0.082	0	1.018			3		1	1		uc008ooz.1		AK039918	RIKEN full-length enriched library, clone:5830468H01 product:unclassifiable, full insert sequence.,Mus musculus adult male thymus cDNA	213.291	0.075	-0.153																	5.372
IVGNm00533	AB049055,AK081264,BC023911,BC138584,BC138585,NM_022031	mRNA									2247	1026	3707	5743	6	0.278	0	4.205			3	3	1	1		uc008ptq.1	NM_022031	Hapln2	hyaluronan and proteoglycan link protein 2	1158.83	0.697	1535.49				26.7129	21.0083	28.8678	21.4071	23.5997	15.8335	19.3678
IVGNm00534	AK081291	ncRNA	TRUE								2684		3025	5709	4	0.47	0	1.49			5		1	1						72.375	0.027	11.9379																	4.856
IVGNm00535	AK081392	mRNA		AK075617						AK034732,AK087551,AK087608,AK157132,AK172003,AK172105,AK172722,BC022899,BC066221,NM_178891,NR_024139	3685			3685		1	0				3		1	1						1049.12	0.285	244.761				27.7995	20.1416	24.6053	16.364	18.709	7.38536	13.8388	257.084	4.28474	0.705334	0.149628	72.0522	-163.954	5.247
IVGNm00536	AK081561,AK086581,NM_030708	mRNA							NM_030708		13874	10746	183428	197302	10	0.07	0	0.721	1		12		1	1		uc008ooa.1	NM_030708	Zfhx4	zinc finger homeodomain 4	12406	0.988	9078.14				105.953	75.9499	50.2074	32.4066	28.8686	13.6122	13.3195	87.8799	1.46466	0.970798	0.112217	52.9923	257.224
IVGNm00537	AK081561,AK086581,NM_030708	mRNA							NM_030708		13874	10746	183428	197302	10	0.07	0	0.721	1		12		1	1		uc008ooa.1	NM_030708	Zfhx4	zinc finger homeodomain 4	12406	0.988	9078.14				145.276	91.8287	61.7702	36.0255	33.3063	15.1695	14.9373	68.3797	1.13966	0.959643	0.175021	38.0105	340.144	6.091
IVGNm00538	AK081943,AK137339,NR_027895	mRNA		AK045127							2093	277		2094		1	0				2			1	5			A930005H10Rik		110.277	0.053		TRUE			37.4161	18.9259	21.6197	14.4338	20.4865	11.5504	28.9309							8.043
IVGNm00539	AK082149	ncRNA									1564		24051	25615	2	0.061	0	1.279	1		2		1	2						121.646	0.078	-5.0864																	6.023
IVGNm00540	AK053118,AK082182	mRNA,ncRNA		AK180852,AK195238				AK143324		AF051908,AK036838,AK081637,AK087859,AK142160,AK162551,AK169673,AK213681,BC057546,BC058635,BC094388,NM_133858,NM_173347,NM_199475	4609		3308	7917	1	0.582	0	0.217	1		8				3					918.066	0.284	18.9779				441.268	431.552	254.641	136.908	124.604	94.8997	124.578	91.706	1.52843	0.974572	0.0998452	56.9151	235.916	10.104
IVGNm00541	AK082297	ncRNA									2746		6984	9732	1	0.282	0	0.364	1		4		2	3						408.578	0.149	-15.8555																	5.205
IVGNm00542	AK032060,AK036018,AK082352,BC059251,NM_178655	mRNA									5770	4860	456832	461920	36	0.011	0.546	7.075	2		6	1	1	2		uc008rgu.1,uc008rgv.1,uc008rgw.1	NM_178655	Ank2	RIKEN full-length enriched library, brain isoform 2, clone:6330566N20 product:partly similar to ANKYRIN 2, full insert sequence.,Mus musculus adult male medulla oblongata cDNA,ankyrin 2	4603.37	0.905	5327.33																	8.454
IVGNm00543	AK082396	ncRNA				AK031655,AK034558,AK035038,AK141181,AK142411,AK142974,AK164239,BC115772,NM_009472,U72634	AK035038				3294			3296		1	0		1		7				1					587.178	0.178	-25.5638
IVGNm00544	AB010140,AK052749,AK082471,AK083422,AK162663,BC030038,NM_008596	mRNA		AK132576							4089	795	11087	15177	5	0.099	0.194	3.243			9	2	1	3		uc008qyn.1,uc008qyo.1	NM_008596	Sypl2,mitsugumin29	complete cds.,Mus musculus mRNA for mitsugumin29,synaptophysin-like 2	1996.48	0.599	813.42
IVGNm00545	AF334669,AK054141,AK082575,AK163839,AY521455,BC137995,D32137,NM_007696	mRNA		AK037892							2566	2166	22532	25098	17	0.102	0.123	8.511					1			uc008qvq.1	NM_007696	Ovgp1	oviductal glycoprotein 1	1671.81	0.652	1923.53																	9.131
IVGNm00546	AJ225124,AK032225,AK082719,BC039156,BC138319,BC138321,NM_008227	mRNA			AK149508,AK149524						4001	2340	10121	14123	7	0.228	0.584	2.343			2	2				uc008pxr.1	NM_008227	Hcn3	cyclic,hyperpolarization-activated	2387.61	0.765	3498.54
IVGNm00547	AF276966,AF276967,AK016538,AK030218,AK031934,AK048286,AK051093,AK079895,AK082804,AK088702,AK122210,BC023906,BC029075,BC050910,NM_001165983,NM_001165984,NM_001165985,NM_001165986,NM_001165987,NM_001165988,NM_028475,NM_153489	mRNA		AK151002	AK133025,AK140585,AK202962						4073	3336	48931	52326	28	0.065	0.338	7.979	3	1	9	3	1	2	2	uc008qal.1,uc008qam.1,uc008qao.1,uc008qap.1,uc008qaq.1,uc008qar.1,uc008qas.1,uc008qat.1,uc008qau.1,uc008qav.1,uc008qaw.1,uc008qax.1,uc008qay.1	NM_028475,NM_153489	Ubap2l,lig-2a	complete cds.,Mus musculus lingerer protein-2a (lig-2a) mRNA,Nice-4 protein homolog isoform 1,Nice-4 protein homolog isoform 2	4003.96	1.004	1768.11				255.034	252.386	297.362	222.393	125.299	55.1279	45.475	459.733	7.66221	0.902336	0.050967	179.285	-814.763	11.467
IVGNm00548	AK021232,AK082869,AK145605	ncRNA	TRUE								2168		3403	5519	1	0.383	0	0.474			7		1	1		uc008pch.1,uc008pci.1		AK021232,AK082869	RIKEN full-length enriched library, clone:C430002E04 product:unclassifiable, full insert sequence.,Mus musculus 7 days embryo whole body cDNA	296.165	0.14		TRUE	linc1333 alternative isoform															6.676
IVGNm00549	AK082954,BC075654	ncRNA									1856		159058	160884	3	0.011	0	1.643			4			1		uc008rse.1,uc008rsg.1		AK082954,BC075654	RIKEN full-length enriched library, clone:C530021L15 product:unclassifiable, full insert sequence.,Mus musculus 12 days embryo spinal cord cDNA	526.538	0.284	-0.6582																	5.3
IVGNm00550	AK017840,AK082993,AK086791	mRNA					BC002224				2351		27912	30263	1	0.061	0	0.556	1		2		1	2		uc008qpt.1		Zfp697	RIKEN full-length enriched library, clone:5730555N10 product:gap junction membrane channel protein alpha 5, full insert sequence.,Mus musculus 8 days embryo whole body cDNA	118.672	0.057	62.6189																	7.317
IVGNm00551	AK083098	ncRNA	TRUE								3388		46082	49473	2	0.069	0	0.59			6		1	1						130.342	0.038	-47.8155																	13.267
IVGNm00552	AK083203	ncRNA		NM_027504							3534		3607	7141	1	0.495	0	0.283			1		1	2		uc008wbz.1		AK083203	RIKEN full-length enriched library, clone:C630028A20 product:unclassifiable, full insert sequence.,Mus musculus adult male hippocampus cDNA	515.101	0.146	6.7144																	8.138
IVGNm00553	AK083219	ncRNA	TRUE								1582		6436	8018	1	0.197	0	0.632			5									77.213	0.049																		5.899
IVGNm00554	AK083287	ncRNA				AK004865,AK004902,AK098104,BC014714,BC024744,NM_008256	AK098104	BC118066			3530		151	3690	1	0.959	0	0.283			12									389.429	0.11	-26.8325																	14.132
IVGNm00555	AK083292	mRNA		AK166551			AK080805			AK014294,AK080805,AK084058,AK088320,AK166551,BC027649,BC037026,BC048352,BC055693,NM_001190258,NM_027015,NR_033727	762			762		1	0				2		1							94.743	0.124	-65.0273																	8.781
IVGNm00556	AK083619	ncRNA	TRUE	AK031826				NR_015580			631			631		1	0						1	1						100.121	0.159		TRUE			31.9251	28.8873	30.7155	19.6829	24.0016	17.4619	29.4261							8.608
IVGNm00557	AK083678,AK146190,AK168101,BC012691,BC058528,NM_013841,U66865	mRNA		AK044317	AK134221						2629	1710	55998	58584	14	0.034	0.343	7.049			2	1	3	2		uc008qly.1,uc008qlz.1	NM_013841	Vps45	RIKEN full-length enriched library, clone:D030064N02 product:vacuolar protein sorting 45 (yeast), full insert sequence.,Mus musculus 9 days embryo whole body cDNA,vacuolar protein sorting 45	1781.6	0.876	1463.18				239.608	192.936	241.186	198.795	166.171	93.1063	68.3244	747.216	12.4536	0.905469	0.0417091	242.555	-691.48	8.512
IVGNm00558	AK083889	mRNA									1132		48103	49235	3	0.023	0	2.65			2									351.413	0.31																		6.161
IVGNm00559	AK084072	ncRNA				AB093234,AF155819,AF155820,AK043874,AK147831,AK164993,AK199211,BC021354,BC050903,BC064783,BC133685,NM_001111053,NM_001195538,NM_019978	AK147831				3593			3593		1	0		1		13				1					360.105	0.1	-63.5639																	7.285
IVGNm00560	AK084077	ncRNA				AK122433,BC005523,BC098461,NM_001163387,NM_138666	AK122433				1593			1593		1	0		1		10									29.475	0.019	-138.752																	5.477
IVGNm00561	AK040741,AK047674,AK048101,AK084338,AK164170,AK169469,BC063049,BC080683	mRNA		NM_027315		X51976	X51976			AK146707,AY112699,AY945937,BC082275,NM_027315	4663			4663		1	0				11		1	2		uc008qac.1		AK040741	RIKEN full-length enriched library, clone:A530022C24 product:unclassifiable, full insert sequence.,Mus musculus adult male aorta and vein cDNA	766.143	0.164	57.3332	TRUE																12.75
IVGNm00562	AK084349	ncRNA				AB093240,AF231110,AK038242,AK153827,AK153848,BC060031,BC096600,NM_020007	AK153827				1174			1174		1	0				4		1	1						164.629	0.14																		5.296
IVGNm00563	AK084359	ncRNA				AK122433,BC005523,BC098461,NM_001163387,NM_138666	AK122433				889			889		1	0				2									3.771	0.004	-162.958																	12.989
IVGNm00564	AK084363	ncRNA				AK028246,AK034819,AK083328,AK131979,AK158769,AK169530,BC038305,BC057543,NM_010703,X58636	BC057543				3615		13303	16935	1	0.214	0	0.277			7			1						104.814	0.029	30.8034																	9.31
IVGNm00565	AK084367,AK162281	mRNA				AB085187,BC075649,BC128271,NM_145820	BC075649	NM_008987			1131			1131		1	0				1		1	1						334.379	0.296	84.1389																	9.794
IVGNm00566	AK028803,AK084815,AK086232,AK088900,AK129240,AK154818,BC023166,BC023391,BC029771,BC038316,BC056491,BC062940,NM_172681	mRNA					AK052409				4909	4794	137155	141875	34	0.03	0	7.284			3		1	1		uc008ppo.1,uc008ppp.1,uc008ppq.1,uc008ppr.1	NM_172681	D930015E06Rik	hypothetical protein LOC229473	2926.93	0.598	2832.42				623.372	611.935	426.723	226.715	150.288	108.002	97.7701	137.819	2.29699	0.986676	0.0473939	95.9706	244.386	11.858
IVGNm00567	AF000149,AK053043,AK084860,BC057853,NM_007378	mRNA									7248	6933	128354	135602	49	0.053	0.397	6.76			3	1	1	1		uc008rel.1	NM_007378	Abca4	member 4, sub-family A,ATP-binding cassette	5790.13	0.799	5992.09																	5.751
IVGNm00568	AK028611,AK030344,AK085133,NM_001168358	mRNA		S70056					NM_001168358		4270	840	16309	20579	5	0.187	0.226	1.343			3		1	1				Tyw3		707.178	0.19	432.886
IVGNm00569	AK028611,AK085133,NM_001168358	mRNA		S70056					NM_001168358		4270	501	16309	20579	4	0.207	0	0.937			3		1	1				Tyw3		628.762	0.147	432.886				32.6329	19.6536	26.1187	15.803	21.8466	14.7645	19.4446							5.398
IVGNm00570	AK085169	ncRNA						AK087467			2238		74	2312	1	0.968	0	0.447			8		2	3						385.574	0.172	-19.3517																	6.375
IVGNm00571	AK014202,AK083941,AK085187,AK170609,BC044809,BC087731,NM_173181	mRNA									3361	972	47170	50423	8	0.025	0.289	6.7	2		9		1	2	2	uc008oog.1	NM_173181	3110050N22Rik	hypothetical protein LOC67306	1237.55	0.799	565.397				114.634	91.3808	72.9569	32.7721	23.1233	17.2607	15.2854	119.894	1.99823	0.982425	0.0626285	79.8609	240.403	11.478
IVGNm00572	AK085231	ncRNA				AF107781,AF107782,AK033962,AK147574,BC141097,BC141098,NM_001039347,NM_019931	AK033962				1940			1940		1	0				1									22.763	0.012	10.4199																	4.94
IVGNm00573	AK016853,AK028215,AK030918,AK085380,AK089060,BC006731,NM_001135149,NM_001135150,NM_026228	mRNA							AK014895		4212	1386	59802	63113	8	0.049	0	2.586			17		1	1		uc008rlz.1,uc008rmb.1,uc008rmc.1	NM_026228	AK030918,Slc39a8	RIKEN full-length enriched library, clone:5830455K23 product:BCG INDUCED INTEGRAL MEMBRANE PROTEIN BIGMO-103 (UP-REGULATED BY BCG-CWS) homolog [Homo sapiens], full insert sequence.,Mus musculus adult male thymus cDNA,solute carrier family 39 (metal ion	1446.73	0.451	1575.21																	4.932
IVGNm00574	AK085621	ncRNA	TRUE								1936		16711	18647	2	0.104	0	1.033			8									140.4	0.073	-9.2507																	5.215
IVGNm00575	AK085636	ncRNA	TRUE								2527		45	2581	1	0.983	0	0.396			2									150.05	0.059	-61.2511																	6.784
IVGNm00576	AF255061,AK085922,BC037373,NM_023624	mRNA		AK161442				BC042410	AF255061		5344	693	6044	11389	1	0.469	0.13	0.187	1		13		1			uc008ppb.1	NM_023624	Lrat	lecithin-retinol acyltransferase	981.945	0.184	1401.24																	6.55
IVGNm00577	AK086005	ncRNA				AK147159	AK147159				336		8737	9073	1	0.037	0	2.976								uc008pqp.1		AK086005	RIKEN full-length enriched library, clone:D830044C03 product:unclassifiable, full insert sequence.,Mus musculus 16 days neonate heart cDNA	87.6	0.261					90.0191	72.9586	78.3237	71.1492	66.8543	42.5052	38.4031	592.626	9.8771	0.910042	0.0435505	217.637	-819.672	7.772
IVGNm00578	AK017883,AK086057	mRNA						BC092057			1623			1623		1	0						2			uc008pdu.1		AK017883	RIKEN full-length enriched library, clone:4930577N17 product:inferred: RIKEN cDNA 4930577N17 gene, full insert sequence.,Mus musculus adult male testis cDNA	941.733	0.58	143.422				38.5913	29.591	26.2553	16.8463	17.5083	10.0067	19.3762	88.7606	1.47934	0.8761	0.240723	36.5808	-208.149
IVGNm00579	AK086154	ncRNA				AK151930,AK152002,NM_001114665	NM_001114665				2491		55	2549	1	0.978	0	0.401	1		5									689.26	0.277	-11.6545																	4.816
IVGNm00581	AK086226	ncRNA				AB093234,AF155819,AF155820,AF155821,AK032424,AK047716,AY968047,AY968048,BC133685,NM_001111051,NM_001111052,NM_001195538,NM_001195539,NM_019978	NM_001195538				2018			2018		1	0				3		1	3						323.601	0.16	14.1705																	6.72
IVGNm00582	AK086354	ncRNA				AK153336,BC049121,BC068192,NM_010763,U03457,U03458	BC049121				3394		246	3648	1	0.933	0	0.295			16		1	2						283.434	0.084	-23.3799																	6.351
IVGNm00583	AK043679,AK086499	ncRNA	TRUE								3540		13290	16830	3	0.193	0	0.847			6		1	1		uc008rpi.1		AK043679	RIKEN full-length enriched library, clone:A830019L24 product:unclassifiable, full insert sequence.,Mus musculus 10 days neonate cortex cDNA	460.797	0.13	-24.2476																	9.41
IVGNm00584	AF422243,AF487898,AK030414,AK035481,AK087083,BC058555,NM_153564	mRNA									3961	2172	30244	32828	11	0.079	0.121	5.447	2	2	6	6	1	1	3	uc008rop.1,uc008roq.1	NM_153564	Gbp5	complete cds.,Mus musculus guanylate binding protein 5 (Gbp5) mRNA,guanylate-binding protein 5	711.371	0.327	688.762
IVGNm00585	AB092504,AK087454,BC018218,NM_145542	mRNA									3851	1590	29578	33429	16	0.052	0.171	9.816			2		1	1		uc008qxj.1	NM_145542	Ahcyl1	S-adenosylhomocysteine hydrolase-like 1	3084.05	1.005	982.915				97.1771	90.8379	129.08	105.708	93.3774	58.9463	55.9263							9.524
IVGNm00586	AK087613	ncRNA				AK144588,M35075,NM_001112698,NM_013609,V00836	NM_013609				2904			2904		1	0				8									206.797	0.071	-8.3087																	7.391
IVGNm00587	AK040707,AK087699,NR_038079	mRNA									1805	387	35126	36931	4	0.045	0	7.366	1	1	2				7	uc008pek.1,uc008pel.1		AK040707,AK087699,Gm2447	RIKEN full-length enriched library, clone:A530017F20 product:unclassifiable, full insert sequence.,Mus musculus adult male aorta and vein cDNA	310.949	0.172	-12.8143
IVGNm00588	AK088382	mRNA						NM_001167906			2527			2527		1	0				1		1	2						459.516	0.182	51.2503																	5.377
IVGNm00589	AK089573,AK150076,BC046776,BC057355,NM_207209,U66835	mRNA							BC046556		4702	3756	73021	77723	23	0.059	0.551	5.823	1	1	4	2	1	1		uc008rit.1	NM_207209	Sec24b	member B,SEC24 related gene family	3311.27	0.912	3950.29				2850.22	2540.3	1077.16	458.641	302.361	330.456	315.753	72.9408	1.21568	0.98818	0.0868197	51.2669	126.363
IVGNm00590	AK089573	mRNA							BC046556		806			806		1	0		1		4									374.47	0.465					105.627	78.8189	50.9893	17.8287	13.6137	8.16374	15.1418	82.1544	1.36924	0.9867	0.0808114	56.9245	147.552	5.575
IVGNm00591	AK089614	ncRNA	TRUE								1857		28	1886	1	0.985	0	0.539			2									248.849	0.134	-25.447																	8.513
IVGNm00592	AK089670,AK172351	ncRNA	TRUE								3376		25	3403	1	0.993	0	0.296			9									1712.44	0.508	-104.744																	5.597
IVGNm00593	AK089708	mRNA									940	360		940		1	0.383													40.751	0.043	34.0412																	9.625
IVGNm00594	AK003707,AK015181,AK030417,AK040909,AK047726,AK089767,AK160081,AK172334,BC026685,BC046787,BC057563,BC089357,NM_029035	mRNA									3135	822	55669	58750	2	0.039	0.254	0.895			4		1	1		uc008vxf.1,uc008vxg.1	NM_029035	Spsb1	splA/ryanodine receptor domain and SOCS box	1345.48	0.474	1849.56				34.0647	30.9514	34.1661	25.1556	21.6742	12.8457	17.5135	288.008	4.80013	0.883101	0.0768267	116.265	-603.582	9.67
IVGNm00595	AF362367,AK078275,AK090064,AK131808,BC087905,NM_145825	mRNA		NM_001008502							2974	507	2890	4682	4	0.212	0.117	5.369			3	2	1	1		uc008pam.1	NM_145825	Cetn4	centrin 4	661.303	0.588	23.1996				56.4829	71.3866	46.6368	45.0862	42.3072	44.9064	46.1817
IVGNm00596	AK090212	mRNA		BC152999							2715		11304	14019	1	0.194	0	0.368			1		1	3						333.294	0.123	88.5151																	5.949
IVGNm00597	AK090388	mRNA				AK098082,AK133820,AK134281,AK188548,AK203161,BC003800,BC043076,D78646,NM_009968,S70056	AK133820				3426		46	3476	1	0.987	0	0.292			6				9					362.149	0.106	-7.9481																	5.178
IVGNm00598	AK131816	ncRNA									1090		3676	4766	3	0.229	0	2.752					1	1						356.372	0.327																		5.555
IVGNm00599	AK131914,AY049765,AY065557,BC130015,NM_145126	mRNA									1510	1206	16479	17989	10	0.068	0.998	8.271			1		1	1		uc008qvx.1	NM_145126	Chi3l4	chitinase 3-like 4	186.613	0.146	172.2																	4.984
IVGNm00600	AK035658,AK075981,AK131984,AK172010,AK210305,AK212613,BC021507,BC023759,BC026927,BC089163,NM_001134791,NM_133885,NM_173350	mRNA			AK166470,NM_146150			AK032364			3109	2169	137786	140588	22	0.02	0	7.927	1	1	2			3		uc008ubz.1,uc008uca.1,uc008ucb.1,uc008ucc.1	NM_133885,NM_173350	Osbpl9	RIKEN full-length enriched library, clone:9530082L10 product:SIMILAR TO OXYSTEROL BINDING PROTEIN-LIKE 9 homolog [Mus musculus], full insert sequence.,Mus musculus adult male urinary bladder cDNA,oxysterol binding protein-like 9 isoform a,oxysterol binding protein-like 9 isoform b	2593.74	0.995	663.768				330.58	307.754	314.885	191.098	110.61	55.6272	48.9784	270.861	4.51435	0.961053	0.044647	149.868	1405.83	10.549
IVGNm00601	AK132084	ncRNA	TRUE								412		15535	15947	2	0.026	0	4.854			1		1			uc008pdl.1		AK132084	RIKEN full-length enriched library, clone:3010088J03 product:unclassifiable, full insert sequence.,Mus musculus 12 days embryo head cDNA	116.551	0.283																		6.085
IVGNm00602	AK132129	ncRNA				AK028275,AK032529,AK035912,AK045724,AK131646,AK142789,AK147389,AK147876,AK165160,AK220523,AY184801,BC096031,NM_178726	AK032529				1955		667	2622	1	0.746	0	0.512			7			1						72.455	0.037	2.1269																	7.777
IVGNm00603	AK132297	ncRNA				AK122433,BC005523,BC098461,NM_001163387,NM_138666	AK122433				3446			3447		1	0		2		14			1	6					499.788	0.145	-76.5805																	5.188
IVGNm00604	AK132609,AK157734,BC003994,D38162,NM_007729	mRNA						AK132829			7538	5412	182512	190060	66	0.037	0	9.379	1	1	11	6	1	1		uc008rbk.1	NM_007729	Col11a1	alpha 1, type XI,procollagen	6632.51	0.921	4421.75																	5.785
IVGNm00605	AK034365,AK131150,AK132612,AK165882,BC060614,BC148610,BC153178,NM_001080755,NM_198416	mRNA									7600	2730	61328	67354	13	0.063	0.509	4.023			11	2	1	1		uc008rtm.1,uc008rtn.1,uc008rto.1,uc008rtp.1	NM_001080755,NM_198416	Zzz3	ZZ domain containing 3,zinc finger	4593.17	0.973	438.773				122.738	105.776	94.3839	63.7014	46.7031	40.0793	36.1926	164.385	2.73974	0.986758	0.0399083	114.318	292.48
IVGNm00606	AK034365,AK131150,AK132612,AK165882,BC060614,BC148610,BC153178,NM_001080755,NM_198416	mRNA									7600	2730	61328	67354	13	0.063	0.509	4.023			11	2	1	1		uc008rtm.1,uc008rtn.1,uc008rto.1,uc008rtp.1	NM_001080755,NM_198416	Zzz3	ZZ domain containing 3,zinc finger	4593.17	0.973	438.773				82.5744	63.7215	67.2879	40.4092	33.4141	26.8875	26.2012	169.194	2.8199	0.932096	0.0905077	83.6638	-7582.93
IVGNm00607	AK005660,AK132965,BC137977,NM_027939	mRNA									2159	1635	23070	25050	11	0.069	0.756	5.889			2	1	1	1		uc008rfs.1		1700006A11Rik	RIKEN full-length enriched library, clone:4930535E05 product:hypothetical RhoGAP domain/Rho GTPase- activating proteins domain profile/Rho GTPase activation protein containing protein, full insert sequence.,Adult male testis cDNA	115.274	0.054	-184.054																	7.212
IVGNm00608	AK133008,BC165984,NM_009350,X84693	mRNA									2388	1857	45885	47857	11	0.039	0.351	5.92	1	1	9	3	1			uc008pah.1	NM_009350	Adad1	adenosine deaminase domain containing 1 (testis	1745.3	0.911	981.84
IVGNm00609	AK133178,BC050811,NM_178418	mRNA			AK032105						5929	1560	43823	46301	11	0.054	0.121	4.443			12		1	2		uc008ozd.1	NM_178418	Ccdc144b	coiled-coil domain containing 144B	235.824	0.059	35.1545																	14.234
IVGNm00610	AK028077,AK133762,BC137723,BC144857,BC144858,NM_001162980	mRNA									3136	2379	100339	103408	20	0.027	0.667	6.976	1	1	2	1	1	1		uc008tyc.1		1700024P16Rik,AK028077	RIKEN full-length enriched library, clone:1700024P16 product:hypothetical protein, full insert sequence.,Mus musculus adult male testis cDNA	979.093	0.344	-177.841																	8.025
IVGNm00611	AK133793	ncRNA	TRUE								2424		2820	5244	2	0.462	0	0.825			4		1			uc008rsd.1		AK133793	RIKEN full-length enriched library, clone:5730419E21 product:unclassifiable, full insert sequence.,Mus musculus 8 days embryo whole body cDNA	463.964	0.191	-1.1361																	5.377
IVGNm00612	AK134080	ncRNA									3143		21605	24748	1	0.127	0	0.318						1						354.246	0.113	10.2165																	7.789
IVGNm00613	AK134227	ncRNA	TRUE								2463		81171	83634	5	0.029	0	2.03			3		2							1283.38	0.521	-34.3328																	5.792
IVGNm00614	AK134322	ncRNA				AK157200,BC172642,D32210,NM_010928	D32210				5120			5121		1	0		1		6									744.119	0.145																		5.586
IVGNm00615	AK008987,AK134433	ncRNA							EU797522		1459			1462		1	0		1		9		1	1						53.07	0.036	-98.7346
IVGNm00616	AK134652	ncRNA							AK220375		1792		15289	17081	2	0.105	0	1.116								uc008pba.1		AK134652	RIKEN full-length enriched library, clone:6330514A14 product:unclassifiable, full insert sequence.,Mus musculus adult male medulla oblongata cDNA	96.139	0.054	18.369																	5.936
IVGNm00617	AK134716,NM_001111051,NM_001111052,NM_001195538,NM_001195539	mRNA							AF155820		7803	2220	288740	296543	16	0.026	0	2.05			7	1	1	1				Dclk1		4565.26	0.585	3625.26				25.8121	19.0571	26.3971	15.4456	15.8023	8.08841	10.2202	321.189	5.35315	0.767412	0.106978	97.5116	-248.242	7.958
IVGNm00618	AK134823	ncRNA	TRUE								2273			2273		1	0		1		3		1	1						184.158	0.081	-36.5746																	5.286
IVGNm00619	AK134841,BC052194,NM_138679	mRNA						X51976	NM_138679		11270	8874	102294	113564	26	0.098	0	4.056	2		5		1			uc008pxj.1	NM_138679	Ash1l	or homeotic discs 1, small,absent	10367.3	0.92	4111.99				363.036	263.559	150.282	100.272	86.6152	65.0543	54.6572	63.9041	1.06507	0.990204	0.0916437	45.9421	104.928	6.426
IVGNm00620	AK019109,AK031193,AK134929,AK141256,BC115559,NM_001162925,NM_030094	mRNA			AK040619,AK134404						2108	939	1384	2669	7	0.442	0.186	6.393			1		1	1		uc008qnx.1,uc008qny.1,uc008qnz.1		Nudt17	RIKEN full-length enriched library, clone:2410015C20 product:hypothetical NUDIX hydrolase containing protein, full insert sequence., mitochondrial precursor (EC 3.6.1.-) (Nudix motif 17).,Mus musculus ES cells cDNA,Nucleoside diphosphate-linked moiety X motif 17,Nudt17 protein.	709.179	0.556	946.806				120.64	131.269	129.963	124.521	96.0866	54.4785	38.8937	897.173	14.9529	0.93648	0.0323442	305.447	-957.246	8.29
IVGNm00621	AK134950	ncRNA				AK122433,BC005523,BC098461,NM_001163387,NM_138666	AK122433				4684			4684		1	0		1		16				2					175.845	0.038	-12.2364																	6.118
IVGNm00622	AK135029	ncRNA	TRUE								1854		247297	249151	8	0.007	0	4.315			4		3	2						160.872	0.087	7.5009																	5.36
IVGNm00623	AK135044,NM_001111053,NM_001195540	mRNA									6026	1089	222766	228792	6	0.026	0	0.996	2		8		1	1				Dclk1		3036.95	0.504	2474.55				95.321	72.6611	89.1826	74.9039	69.6025	48.244	35.999	859.086	14.3181	0.879406	0.0463598	234.798	-517.886	6.383
IVGNm00624	AK135051	mRNA									1841	1026	67585	69426	4	0.027	0.557	2.173					1	1		uc008qtd.1	NM_018800	Syt6	synaptotagmin 6	1461.08	0.794					135.897	226.862	155.925	124.804	97.9491	69.4344	63.5315	315.16	5.25266	0.73776	0.11749	90.7724	-214.106	9.036
IVGNm00625	AF481860,AK135230,AK167743,BC138519,BC138520,NM_001165951,NM_177545	mRNA									3228	1581	44580	47268	7	0.038	0.365	4.057			1	1	1	2	4	uc008qrs.1,uc008qrt.1	NM_177545	Vangl1	van gogh-like 1,vang	1574.57	0.878	3460.83																	6.716
IVGNm00626	AK135395	ncRNA			AK047315	AK031655,AK034558,AK035038,AK141181,AK142411,AK142974,AK164239,BC115772,NM_009472,U72634	AK035038				3066			3066		1	0		1		8				2					474.614	0.155	22.4385																	11.139
IVGNm00627	AK135825,BC034510,NM_001114665,NM_153118	mRNA							AK151930		5330	1827	75619	80949	15	0.066	0	2.814	1		8		1			uc008rer.1	NM_153118	Fnbp1l	formin binding protein 1-like	4203.27	0.789	1211.76				178.955	168.393	174.98	146.383	108.648	69.4384	89.0006	308.114	5.13523	0.921019	0.0586963	139.585	-1485.94	8.906
IVGNm00628	AK135877,AK162138	ncRNA									2456		28849	31305	3	0.078	0	1.221	1		4		1			uc008ovz.1		AK162138	RIKEN full-length enriched library, clone:7420431J11 product:unclassifiable, full insert sequence.,Mus musculus in vitro fertilized eggs cDNA	110.72	0.045	9.4372																	6.15
IVGNm00629	AK135894	ncRNA			AK081215				BC046642		1671		34724	36395	3	0.046	0	1.795			1					uc008rkb.1		AK135894	RIKEN full-length enriched library, clone:7420434E04 product:unclassifiable, full insert sequence.,Mus musculus in vitro fertilized eggs cDNA	114.637	0.069																		6
IVGNm00630	AK016857,AK136175	mRNA									2014	744	27097	29111	6	0.069	0.369	4.785	4	1	4	1	1	1		uc008pcc.1		4933421B21Rik	RIKEN full-length enriched library, clone:4933421B21 product:RIKEN cDNA 4933421B21 (In vitro fertilized eggs cDNA, clone:7420469I18 product:hypothetical protein, full insert sequence).,Adult male testis cDNA	1139.13	0.853	132.785																	6.416
IVGNm00631	AF157598,AK006478,AK008537,AK028049,AK136240,AK162194,BC017161,NM_025926,NM_027287	mRNA		NM_057172							2379	1014	23643	25988	3	0.057	0.281	2.111	1	1	5	2	2	2		uc008rsq.1,uc008rsr.1	NM_025926,NM_027287	Dnajb4	member 4, subfamily B,DnaJ (Hsp40) homolog	1894.59	0.871	937.67				219.85	162.888	122.849	75.3741	66.5727	52.6045	59.6577	81.563	1.35938	0.982007	0.0949667	53.7623	168.903	7.718
IVGNm00632	AK136278,AK146553,BC012686,EU553486,L47970,NM_001163457,NM_008642	mRNA		AK089967							4272	2727	49262	53534	19	0.056	0.638	6.243			10	5	1	1		uc008rmw.1,uc008rmx.1	NM_008642	Mttp	microsomal triglyceride transfer protein	2254.33	0.779	2200.4				28.4842	24.3581	37.168	30.507	33.7135	26.8133	32.3458							8.198
IVGNm00633	AK136342	ncRNA									4361		60895	65262	2	0.067	0	0.459	1		10				4					507.531	0.116	49.8886																	12.804
IVGNm00634	AK043956,AK048250,AK052560,AK136546,AK142294,BC072644,NM_001080818,NM_001173553	mRNA,ncRNA				AK043956,AK048250,AK052560,AK142294,BC072644,NM_001080818,NM_001173553	BC072644				4577	1809	147142	151480	15	0.021	0	4.714	3	2	11	4	2	2	4	uc008rca.1,uc008rcb.1	NM_001080818	Cdc14a	CDC14 cell division cycle 14 homolog A	3068.97	0.775	904.379																	6.74
IVGNm00635	AK136654	ncRNA						X51976			925		3565	4490	1	0.206	0	1.081	1		5		1	2		uc008pzf.1		AK136654	RIKEN full-length enriched library, clone:9230018K07 product:hypothetical protein, full insert sequence.,Mus musculus adult male epididymis cDNA	116.898	0.126																		6.698
IVGNm00636	AK136913	ncRNA				AK122433,BC005523,BC098461,NM_001163387,NM_138666	AK122433				2246			2246		1	0				13									394.114	0.175																		14.119
IVGNm00637	AK137033	ncRNA			AK138252						1082		15022	16104	2	0.067	0	1.848			1				6	uc008ppm.1		AK137033	RIKEN full-length enriched library, clone:9430045E21 product:unclassifiable, full insert sequence.,Mus musculus 12 days embryo embryonic body between diaphragm region and neck cDNA	205.239	0.19	-36.0673																	5.579
IVGNm00638	AK077448,AK137044,AK156624,AK161348,AK168265,AK168340,BC008241,NM_008945,U65636	mRNA			NM_001165948						1155	797	1686	2841	6	0.346	0.686	6.726			2	1	1	1		uc008qhe.1	NM_008945	Psmb4	proteasome beta 4 subunit	778.435	0.842	1294.23				25551.9	29217.4	23498.2	21517.3	14710.9	5120.52	1564.03	474.844	7.91407	0.972288	0.0262202	259.309	2812.86	15.133
IVGNm00639	AK137145	ncRNA		AK196497				BC043029	BC055879		2139		638	2777	2	0.77	0	0.935			1		2	4	9					604.716	0.283	-3.7264																	6.345
IVGNm00640	AK137339	mRNA		AK045127							2093	277		2094		1	0.132				2			1	5					110.277	0.053	-169.128	TRUE																8.983
IVGNm00641	AK049115,AK051104,AK084347,AK134324,AK137495,AK138568,AK154124,BC011094,BC067017,BC125277,NM_001025312,NM_133865	mRNA		NM_001163553				AK052792			4288	1623	4661	8783	3	0.274	0.302	1.468			4	2	1	1		uc008qtl.1,uc008qtm.1	NM_001025312,NM_133865	Dclre1b	PSO2 homolog isoform,DNA cross-link repair 1B	1348.67	0.51	569.604				47.2728	38.8159	22.7705	13.0163	15.633	9.26942	11.8876	68.4175	1.14029	0.982088	0.115189	44.8308	144.38	12.294
IVGNm00642	AK137696	ncRNA	TRUE								4809		2878	7687	3	0.626	0	0.624	1		3			1		uc008qdo.1		AK137696	RIKEN full-length enriched library, clone:9930038G15 product:unclassifiable, full insert sequence.,Mus musculus adult female vagina cDNA	260.29	0.054	25.2408																	5.129
IVGNm00643	AK016321,AK137776,BC052483,BC096378,NM_029482	mRNA		AK043363,AK152624							3004	336	1772	4777	1	0.338	0.111	1.106	1		8	2	1	1		uc008pnu.1		4930579G24Rik	RIKEN full-length enriched library, clone:A130004M03 product:survivor of motor neuron protein interacting protein 1, full insert sequence (Hypothetical protein).,16 days neonate thymus cDNA	421.255	0.249	338.058				101.034	83.4449	81.4856	46.6618	27.8709	12.2151	12.0245	216.385	3.60642	0.974308	0.0435676	132.803	583.825	6.598
IVGNm00644	AK137804	ncRNA						AK147159			1266			1266		1	0		1		3		1	1						106.645	0.084																		5.884
IVGNm00645	AK138111	ncRNA				AK035255,AK086062,AK161889,BC065134,BC085188,BC139432,BC139433,NM_001165948,NM_172683	NM_001165948				2517		172	2691	1	0.936	0	0.397	1		5									413.586	0.164	-13.814																	5.648
IVGNm00646	AK138141	ncRNA				AB093234,AF155819,AF155820,AK043874,AK147831,AK164993,AK199211,BC021354,BC050903,BC064783,BC133685,NM_001111053,NM_001195538,NM_019978	AK147831				1600			1600		1	0				6									116.556	0.073	-14.0465																	5.434
IVGNm00647	AK138153	ncRNA				AK083116,AK122433,NM_138666	AK122433				2782			2784		1	0		1		3									159.577	0.057																		4.948
IVGNm00648	AK138397,BC022612,NM_029431	mRNA									1730	693	20671	22401	5	0.077	0.333	2.89			2	1	1	1		uc008qfu.1	NM_029431	Them4	thioesterase superfamily member 4	429.868	0.252	-89.0588				154.083	139.269	110.07	77.3673	57.2213	27.2846	28.6073	199.024	3.31707	0.994724	0.0210483	155.528	276.293	10.497
IVGNm00649	AK082737,AK085534,AK138439,BC031708,NM_001113412,NM_029347	mRNA									3037	1656	367542	369433	15	0.005	0.254	7.932			6	3	1	1		uc008tsv.1,uc008tsw.1,uc008tsx.1	NM_029347	2310009E04Rik,Fggy	CLONE PLACE1001869, RIKEN full-length enriched library, WEAKLY SIMILAR TO L- RIBULOKINASE (EC 2.7.1.16) (HYPOTHETICAL 27.5 KDA PROTEIN) homolog [Homo sapiens], clone:2310009E04 product:CDNA FLJ10986 FIS, full insert sequence.,Mus musculus adult male tongue cDNA,hypothetical protein LOC75578	1529.57	0.809	2044.53				173.956	186.102	205.439	175.474	147.832	72.5173	40.4979	858.683	14.3114	0.91514	0.0389658	265.54	-696.011	7.625
IVGNm00650	AK138462	ncRNA	TRUE								1505		89319	90824	4	0.017	0	2.658	1				2	5		uc008pdk.1		AK138462	RIKEN full-length enriched library, clone:A330016C21 product:unclassifiable, full insert sequence.,Mus musculus adult male spinal cord cDNA	55.93	0.037	16.7633																	5.584
IVGNm00651	AK029402,AK138534	ncRNA						AK036018			1834		5220	6984	3	0.253	0	1.636			4		1			uc008rhc.1		AK029402	RIKEN full-length enriched library, clone:4833430L01 product:unclassifiable, full insert sequence.,Mus musculus 0 day neonate head cDNA	146.155	0.08	-21.8492				55.3227	50.1056	49.3047	38.5245	38.3251	26.791	28.869	262.08	4.368	0.942585	0.0562322	132.106	16231.6	6.165
IVGNm00652	AK138691	ncRNA	TRUE								449		1334	1783	2	0.252	0	4.454			1		1	1		uc008qvf.1		AK138691	RIKEN full-length enriched library, clone:A430013M15 product:unclassifiable, full insert sequence.,Mus musculus 0 day neonate thymus cDNA	8.329	0.019																		5.681
IVGNm00653	AF065906,AF065907,AF065908,AF065909,AF306543,AK138728,BC053731,M18934,NM_013486,X06143,Y00023	mRNA									1144	1035	11119	12032	4	0.075	0.888	3.62			1	1	1	1		uc008qrf.1	NM_013486	Cd2	CD2 antigen	197.29	0.201	-80.966
IVGNm00654	AK138914	ncRNA				AK031655,AK141181,AK142411,AK142974,AK164239,BC115772,NM_009472,U72634	AK142974				3207			3207		1	0				6									596.555	0.186	18.0428																	10.479
IVGNm00655	AK139055	ncRNA							NM_025679		2317			2317		1	0				3		1	2						341.384	0.147	-21.7047																	5.618
IVGNm00656	AK139061	ncRNA							NM_009474		3174		6610	9784	3	0.324	0	0.945			3									684.326	0.216	27.4964																	5.955
IVGNm00657	AK139134	ncRNA				AB038662,AB038663,AB038664,AB038665,AB038666,AB038667,AF475069,AF475070,AF475071,AF475072,AF475073,AF475074,AF475075,AF475076,AF475077,AF475078,AK034465,AK048796,AK134467,AK173075,BC079881,NM_001163348,NM_001163349,NM_001163350,NM_001163351,NM_030699,NM_133488	AK173075				3401			3405		1	0				14									206.926	0.061	-20.4882																	5.02
IVGNm00658	AK139135	ncRNA	TRUE								2202		2088	4290	1	0.513	0	0.454			6			2						285.758	0.13	16.8727																	4.842
IVGNm00660	AK139864	ncRNA	TRUE								1411		96102	97513	5	0.014	0	3.544			1					uc008rsh.1		AK139864	RIKEN full-length enriched library, clone:B020030O10 product:unclassifiable, full insert sequence.,Mus musculus 2 cells egg cDNA	25.848	0.018	-76.9194				94.7165	122.84	86.1651	77.5395	79.6744	56.0115	46.5114	1596.75	26.6125	0.702195	0.529235	8343.11	882.857	6.795
IVGNm00661	AK139930	ncRNA	TRUE								2475		5584	8059	3	0.307	0	1.212			6		2							104.758	0.042	6.2374																	7.786
IVGNm00662	AK139932	ncRNA	TRUE								2306		1961	4267	1	0.54	0	0.434			4									12.015	0.005	27.9029																	8.304
IVGNm00663	AK139969	ncRNA				AK122433,BC098461,NM_001163387,NM_138666	AK122433				1610			1610		1	0				3									166.483	0.103	-14.6407																	5.418
IVGNm00664	AK014543,AK140064,AK184727,AX775753,BC044759,NM_027558	mRNA									3007	654	13714	16721	2	0.176	0	2.439	1		2		1			uc008pce.1		Pgrmc2	Membrane-associated progesterone receptor component 2.	1846.29	0.986	773.239				106.833	91.1459	114.13	79.2961	48.3875	23.1556	25.2525	369.335	6.15558	0.895331	0.0602691	148.564	-759.903	11.963
IVGNm00665	AK140446	mRNA		AK047191							876	240	514	1390	1	0.63	0.274	1.142					2	2		uc008oqa.1		AK140446	RIKEN full-length enriched library, clone:B830027N01 product:unclassifiable, full insert sequence.,Mus musculus 10 days neonate medulla oblongata cDNA	340.415	0.389	-131.744																	5.486
IVGNm00666	AK037552,AK047147,AK047149,AK140556,BC060175,NM_025662,NM_178016	mRNA									4865	1326	70190	74914	11	0.063	0	2.261	1		4		1			uc008rts.1,uc008rtt.1	NM_025662,NM_178016	Pigk	phosphatidylinositol glycan anchor biosynthesis	1227.76	0.259	1038.72				60.6982	48.0903	67.5201	50.972	43.1746	20.3456	18.3234	686.414	11.4402	0.828906	0.0599945	183.082	-392.411	5.622
IVGNm00667	AK140585	ncRNA		AK088746	AF276966			AK164224			640		1926	2566	3	0.249	0	4.688			1									114.768	0.179	0.3096																	6.669
IVGNm00668	AF037205,AF037206,AK034135,AK036591,AK050095,AK082296,AK139447,AK140682,AK158046,AK167278,BC058182,NM_001113413,NM_011883	mRNA									3291	1143	96579	99355	9	0.011	0.147	7.641	1	1	5	2	1	4		uc008phh.1,uc008phi.1,uc008phj.1,uc008phk.1,uc008phl.1	NM_011883	Rnf13,Rzf	RIKEN full-length enriched library, clone:9830138I04 product:ring finger protein 13, clone:F930021D16 product:ring finger protein 13, complete cds., full insert sequence)., full insert sequence.,Adult male bone cDNA,Mus musculus RING zinc finger protein (Rzf) mRNA,Rnf13 protein (Adult inner ear cDNA,ring finger protein 13	1611.95	0.783	926.688				286.327	270.746	296.573	263.196	228.364	188.275	133.309	1282.76	21.3793	0.962876	0.0233037	428.209	-1288.37	10.356
IVGNm00669	AK140730	ncRNA						AK136409	AK019775		4580		1702	6282	3	0.729	0	0.655	2		6									571.887	0.125	3.7279	TRUE																5.662
IVGNm00670	AK140844	ncRNA	TRUE					AK015762			809		5317	6126	1	0.132	0	1.236												11.849	0.015	26.3597																	5.158
IVGNm00671	AK140958	ncRNA				AK122433,BC005523,BC098461,NM_001163387,NM_138666	AK122433				3563			3564		1	0		2		20									52.136	0.015	-4.921																	7.769
IVGNm00672	AF310338,AK007782,AK031072,AK032203,AK141040,AK168589,BC021382,NM_023644	mRNA,ncRNA				AF310338,AK007782,AK031072,AK032203,AK168589,BC021382,NM_023644	AK032203				6748	2154	38391	41298	18	0.057	0	7.715	1		11	1		2	4	uc008oyy.1	NM_023644	Mccc1	methylcrotonoyl-Coenzyme A carboxylase 1	1730.69	0.722	1788.59				516.926	543.311	531.407	516.506	446.229	371.199	221.058	1608.19	26.8032	0.984805	0.558911	1901.46	1393.3	7.79
IVGNm00673	AK017449,AK141192,AK170983,BC058221,EU004151,NM_001081229	mRNA							BC117998		8916	2307	42342	51099	3	0.171	0	0.34			17		2	2		uc008php.1,uc008phq.1,uc008phr.1	NM_001081229	Tsc22d2	TSC22 domain family 2	4112.82	0.461	2015.21																	7.477
IVGNm00674	AK141561	ncRNA				AK031655,AK034558,AK035038,AK141181,AK142411,AK142974,AK164239,BC115772,NM_009472,U72634	AK035038				3306			3306		1	0				12				7					483.395	0.146	-53.6729																	9.917
IVGNm00675	AF411837,AK041594,AK141586,AK173113,NM_139304	mRNA									4679	1782	61628	64753	9	0.033	0.228	4.727	1		1	1		1	2	uc008qca.1,uc008qcb.1	NM_139304	Gatad2b	transcription repressor p66 component of the	3072.91	0.992	2139.79				61.8311	67.6802	64.7478	42.7571	39.1354	22.0859	26.5515	287.031	4.78384	0.911952	0.0657882	126.969	-1101.28	10.032
IVGNm00676	AK141977	ncRNA				AK031655,AK034558,AK035038,AK141181,AK142411,AK142974,AK164239,BC115772,NM_009472,U72634	AK035038				5627			5627		1	0		1		16				1					680.318	0.121	-0.4595																	9.448
IVGNm00677	AK142074	ncRNA		AJ000338							2164		1703	3867	2	0.56	0	0.924			3		1			uc008run.1		AK142074	RIKEN full-length enriched library, clone:D230021C23 product:unclassifiable, full insert sequence.,Mus musculus 12 days embryo eyeball cDNA	592.614	0.274	27.4281																	13.871
IVGNm00678	AK021231,AK084600,AK142083,NM_001101479	mRNA							NM_001101479		5218	5011	527	5745	1	0.908	0	0.192	1		18		1	2		uc008pdb.1		AK021231,Pabpc4l	RIKEN full-length enriched library, clone:C330050A14 product:unclassifiable, full insert sequence.,Mus musculus ES cells cDNA	914.562	0.175	2490.68																	5.339
IVGNm00679	AK142469	ncRNA	TRUE								1997		2504	4501	1	0.444	0	0.501			6		1							437.086	0.219	-58.976																	5.06
IVGNm00680	AK142519	ncRNA	TRUE								1931		308	2239	1	0.862	0	0.518			3									328.216	0.17	-41.3296																	5.587
IVGNm00681	AK012195,AK142604,BC160329,NM_007910,U90663	mRNA		AK132440				AK181344			1596	618	3040	4636	3	0.169	0.387	4.847					1	3	4	uc008pys.1	NM_007910	Efna4	ephrin A4	770.208	0.816	1253.5																	8.829
IVGNm00682	AK142740	mRNA									2331	1590	10406	12737	4	0.183	0.682	1.716			1					uc008rjn.1		Cyp2u1	RIKEN full-length enriched library, clone:8430436A10 product:weakly similar to RAT CYTOCHROME P-450B TYPE E (FRAGMENT) [Rattus norvegicus], full insert sequence.,Mus musculus 16 days embryo lung cDNA	940.8	0.404	1613.08																	5.542
IVGNm00683	AK086423,AK142756	ncRNA							AK054129		2125			2125		1	0		1		3		1							296.517	0.14	9.7163																	10.412
IVGNm00684	AK142784	ncRNA				AK083116,AK122433,NM_138666	AK122433				4350			4350		1	0		1		12									229.056	0.053	20.2527																	5.179
IVGNm00685	AK143050	ncRNA						AK147159			1299		46372	47671	2	0.027	0	1.54			2									3.162	0.002	43.789																	5.617
IVGNm00686	AK143053	ncRNA				AK122433,BC005523,BC098461,NM_001163387,NM_138666	AK122433				2558			2559		1	0		1		16									98.767	0.039	-19.9225																	5.542
IVGNm00687	AK047898,AK081345,AK143270	mRNA						X51976	AK159448		1803		407	2210	1	0.816	0	0.555			1									161.999	0.09	56.333				51.9139	50.459	60.2996	48.2395	46.9712	28.7034	27.3566	855.284	14.2547	0.827578	0.0571925	200.508	-377.511	6.814
IVGNm00688	AK143350	ncRNA	TRUE								702		3702	4404	2	0.159	0	2.849			1		1							198.436	0.283	37.1431																	4.76
IVGNm00689	AK002518,AK076084,AK131879,AK143728,BC005485,NM_133859	mRNA									3381	1218	872	4253	2	0.658	0.36	1.192			1	1	1	1		uc008qte.1,uc008qtf.1	NM_133859	Olfml3	RIKEN full-length enriched library, clone:0610011B12 product:SIMILAR TO HNOEL-ISO PROTEIN homolog [Mus musculus], full insert sequence.,Mus musculus adult male kidney cDNA,olfactomedin-like 3	1421.22	0.678	3899.33				52.136	46.0668	60.3862	48.1005	42.3495	25.9447	21.4557	941.409	15.6902	0.837917	0.0541771	213.718	-391.452	9.928
IVGNm00690	AK143764,NR_033591	ncRNA	TRUE								14357		8906	14357	2	0.199	0	0.902	4		50			2				Gm6300		1009.29	0.075																		6.384
IVGNm00691	AK143784	mRNA									1673		9361	11034	3	0.152	0	1.793			2		1	1		uc008qnb.1		AK143784	RIKEN full-length enriched library, clone:E330010G22 product:hypothetical protein, full insert sequence.,Mus musculus 2 days pregnant adult female ovary cDNA	571.37	0.342	32.5714																	6.02
IVGNm00692	AK144373	mRNA		AK031216				AF188507			3217	651		3218		1	0.202				9	6	1	2						1906.31	0.593	1556.22																	5.692
IVGNm00693	AK144477	ncRNA							AK136208		808		108881	109689	3	0.007	0	3.713			3		1	1		uc008txr.1		AK144477	RIKEN full-length enriched library, clone:G630076E19 product:unclassifiable, full insert sequence.,Mus musculus adult male gall bladder cDNA	72.695	0.09																		6.461
IVGNm00694	AK144572	ncRNA	TRUE								2094		335357	337451	5	0.006	0	2.388	1		5		1							204.871	0.098	29.7189																	5.496
IVGNm00696	AK144724	ncRNA	TRUE								1804		33109	34913	3	0.052	0	1.663			3		1	1		uc008pmp.1		AK144724	RIKEN full-length enriched library, clone:G730027E08 product:unclassifiable, full insert sequence.,Mus musculus lung RCB-0558 LLC cDNA	136.514	0.076	-4.9065																	9.682
IVGNm00697	AK144834	ncRNA	TRUE								2540		5270	7810	1	0.325	0	0.394			9		2	2		uc008peh.1		AK144834	RIKEN full-length enriched library, clone:G730040D10 product:unclassifiable, full insert sequence.,Mus musculus lung RCB-0558 LLC cDNA	295.439	0.116	3.8126				62.8088	53.0159	46.7191	31.022	32.155	19.2412	27.1372	131.825	2.19708	0.937107	0.110368	66.8721	4592.46	7.203
IVGNm00698	AK144882	ncRNA	TRUE								902		78396	79298	2	0.011	0	2.217			1		1			uc008say.1		AK144882	RIKEN full-length enriched library, clone:G730046M21 product:unclassifiable, full insert sequence.,Mus musculus lung RCB-0558 LLC cDNA	23.612	0.026	22.2318																	5.564
IVGNm00699	AK144940	ncRNA		AK160166				NM_001163457			1640		10105	11749	1	0.14	0	0.61			2									273.863	0.167	18.356																	5.559
IVGNm00700	AK013338,AK145076,AK165224,BC050110,NM_028349	mRNA		AK041636	NM_008246						4262	1962	31797	35915	17	0.07	0.394	6.959	1	1	7	1	1		2	uc008rcm.1,uc008rcn.1	NM_028349	Sass6	spindle assembly 6	2047.63	0.87	1135.29				100.307	109.759	92.1987	52.3988	34.3896	20.5216	24.64	201.526	3.35877	0.952481	0.0638318	108.419	1427.01
IVGNm00701	AK053582,AK145309	mRNA							AK146387		2087			2097		1	0				7		1	1						1563.43	0.749	-8.4488				105.784	69.4954	80.8864	48.9692	38.6949	15.9278	16.5075	238.976	3.98294	0.90758	0.0785582	106.056	-943.415	15.896
IVGNm00702	AF220434,AF486579,AK145342,BC066157,NM_147221	mRNA									2904	2367	197437	200341	10	0.014	0.33	4.905	1	1			1			uc008tzv.1,uc008tzw.1	NM_147221	Glis1	GLIS family zinc finger 1	1918.84	0.688	2944.09																	7.257
IVGNm00703	AF042730,AK011770,AK078406,AK083238,AK145472,AK147778,AK152774,AK153457,AK160203,AK160467,AK165977,AK168457,BC049080,BC055722,NM_018864	mRNA									4121	834	15299	19420	8	0.116	0.202	3.988			6	2	1	1		uc008opo.1,uc008opp.1	NM_018864	Impa1	inositol (myo)-1(or 4)-monophosphatase 1	925.133	0.382	973.97				205.904	186.368	225.708	188.687	145.263	79.5872	47.7369	828.666	13.8111	0.923391	0.0364666	274.631	-814.511	9.202
IVGNm00704	AK021232,AK082869,AK145605	ncRNA	TRUE								2168		3403	5519	1	0.383	0	0.474			7		1	1		uc008pch.1,uc008pci.1		AK021232,AK082869	RIKEN full-length enriched library, clone:C430002E04 product:unclassifiable, full insert sequence.,Mus musculus 7 days embryo whole body cDNA	296.165	0.14		TRUE	linc1333 alternative isoform															6.608
IVGNm00705	AB034693,AK029348,AK145825,BC003706,NM_001163522	mRNA									3468	783	88531	91075	11	0.01	0.171	11.123			5	1		1	9	uc008rmj.1,uc008rml.1	NM_016885	Emcn	RIKEN full-length enriched library, clone:I530003F17 product:endomucin, full insert sequence.,11 days pregnant adult female placenta cDNA,endomucin	422.817	0.319	-494.363																	5.688
IVGNm00706	AB049637,AK040055,AK046099,AK146237,AK161563,AK162023,BC116385,BC116386,NM_030116	mRNA									1657	804	6137	7794	6	0.21	0.174	5.988			1		3	3		uc008qgj.1	NM_030116	Mrpl9	mitochondrial ribosomal protein L9	666.159	0.628	1050.13				1430	1767.77	1485.48	1221.77	774.498	334.386	175.497	449.884	7.49807	0.951218	0.0354856	217.78	-6839.66	11.715
IVGNm00708	AK147007	ncRNA	TRUE								1168			1168		1	0				1				9					51.656	0.044	-8.1364																	6.786
IVGNm00709	AK147070	ncRNA	TRUE								1435		31740	33175	1	0.043	0	0.697			1		1			uc008oul.1		AK147070	RIKEN full-length enriched library, clone:I920096M23 product:unclassifiable, full insert sequence.,Mus musculus 17 days embryo stomach cDNA	16.474	0.011	-123.086	TRUE			32.3924	28.4034	27.2244	15.5807	13.4359	8.04992	9.01182	191.288	3.18813	0.960627	0.0606402	107.805	847.875	7.098
IVGNm00710	AF321909,AK122205,AK141921,AK147185,AK154059,AK161135,AK162742,AK163977,BC048174,BC050747,NM_001159603,NM_001159604,NM_001159605,NM_001159606,NM_030722	mRNA									5348	3570	113590	118206	21	0.033	0.614	5.375	1		2				1	uc008uzk.1,uc008uzm.1,uc008uzn.1,uc008uzo.1,uc008uzp.1,uc008uzq.1	NM_030722	Pum1	pumilio 1	5115.97	0.977	2454.66				49.512	41.7905	37.7635	17.5626	17.0751	11.7331	16.457	122.112	2.03519	0.940914	0.115199	62.9729	2005.52
IVGNm00711	AF175279,AK147442,BC034129,BC056343,BC099700,NM_019972	mRNA									6854	2574	70625	77380	20	0.034	0.036	7.302	2	2	7	1	1	1		uc008qyr.1,uc008qys.1	NM_019972	Sort1	sortilin 1	3543.58	0.933	2645.42				308.463	290.041	348.397	334.257	319.372	328.907	323.345
IVGNm00712	AK147615	mRNA		AK015763							6841			6844		1	0				9		1	1						760.068	0.111	119.802
IVGNm00713	AK028358,AK075827,AK077309,AK082793,AK147825,AK152150,AK153158,BC008612,BC031932,M74012,NM_001204979,NM_011319	mRNA		BC152373							3632	1611	16764	20396	11	0.055	0.172	6.944			5	1	1			uc008qza.1,uc008qzb.1,uc008qzc.1	NM_011319	Sars	RIKEN full-length enriched library, clone:2310047B07 product:seryl-aminoacyl-tRNA synthetase 1, full insert sequence.,Mus musculus adult male tongue cDNA,seryl-aminoacyl-tRNA synthetase	1692.32	0.914	2497.19				199.962	207.875	242.601	208.28	132.671	65.8338	48.4426	683.689	11.3948	0.881547	0.0484614	212.861	-564.143	13.533
IVGNm00714	AK148003	ncRNA						AB553633			2083		7051	9135	1	0.228	0	0.48			5		1	1						257.375	0.124	-10.3392																	5.809
IVGNm00715	AK148220	ncRNA						NM_001170985			3694		1063	4763	1	0.777	0	0.271			3		1	1						502.439	0.136	13.4102	TRUE			187.229	175.413	155.261	131.028	100.287	68.0215	69.4408	262.19	4.36983	0.995301	0.0156499	205.812	361.108	5.982
IVGNm00716	AK148321	ncRNA		NM_009877							2069		242160	244229	9	0.008	0	4.35			5		1	1		uc008toj.1		AK148321	RIKEN full-length enriched library, clone:G370089A13 product:unclassifiable, full insert sequence.,Mus musculus B16 F10Y cells cDNA	433.515	0.21	37.4711																	6.036
IVGNm00717	AK075609,AK132260,AK148481,AK148486,AK167024,AK168238,AK168877,AK169261,BC028833,BC064712,D29639,NM_008212	mRNA			AK213488			BC038703			3764	945	36894	38615	7	0.037	0.121	4.982			7		2	1		uc008rjl.1,uc008rjm.1	NM_008212	Hadh	L-3-hydroxyacyl-Coenzyme A dehydrogenase	772.167	0.541	1586.07				339.291	259.457	359.282	326.646	273.694	237.212	114.866	1527.1	25.4517	0.827521	1.32752	3525.73	974.62	10.705
IVGNm00718	AK148484,AK165731,BC010814,NM_145539,Z47778	mRNA									1359	609	14868	16228	4	0.055	0	4.673	1	1	1		2	2		uc008pha.1	NM_145539	Tm4sf4	transmembrane 4 superfamily member 4	474.961	0.676	829.054																	8.792
IVGNm00719	AK148512	mRNA									2334	204	4989	7327	5	0.319	0.087	2.142			1	1	2	4						568.904	0.244	377.382				33.0837	24.3439	28.2602	19.7137	22.2947	11.6866	17.606	220.689	3.67815	0.728709	0.160901	65.4754	-161.021	6.506
IVGNm00720	AK034261,AK083167,AK084941,AK087480,AK145267,AK146480,AK148573,AY035852,AY035853,BC014290,BC023366,BC062908,NM_001113209,NM_001113210,NM_008687,U57634,Y07685,Y07686,Y07687	mRNA									8770	1710	206704	215136	11	0.007	0.192	5.674	2		20	5	1		4	uc008tka.1,uc008tkb.1,uc008tkc.1,uc008tkd.1,uc008tke.1,uc008tkf.1,uc008tkg.1,uc008tkh.1	NM_008687	Nfib	RIKEN full-length enriched library, clone:9330170D16 product:nuclear factor I/B, full insert sequence.,Mus musculus adult male diencephalon cDNA,Nuclear factor 1 B-type (Nuclear factor 1/B) (NF1-B) (NFI-B) (NF-I/B) (CCAAT-box-binding transcription factor) (CTF) (TGGCA-binding protein).,nuclear factor I/B	7788.83	1.005	881.626				181.91	162.931	183.925	159.476	143.942	89.8273	65.5307	994.178	16.5696	0.943049	0.0300194	332.233	-1001.78	9.365
IVGNm00721	AK010555,AK148729,AK167835,AK168844,BC147498,BC150966,BC150967,BC151198,NM_001081094	mRNA									2813	1383	26849	29038	10	0.037	0.392	9.083			6	1	1	1		uc008rqo.1,uc008rqp.1	NM_001081094	2410019A14Rik	hypothetical protein LOC229937	1163.31	0.734	512.017				3709.55	3602.7	2532.02	1259.01	440.093	302.923	225.263	149.975	2.49958	0.988261	0.0409591	106.358	254.235	13.163
IVGNm00722	AK085005,AK148836	ncRNA				AK082867,AK146757,AK167097,BC010759,BC085087,M61731,NM_007917	NM_007917				2180		47	2180	1	0.976	0	0.534	1		4				6					209.918	0.096	3.0733																	7.027
IVGNm00723	AK149010	mRNA									1905	354	5675	7580	3	0.251	0.186	1.575			2									863.033	0.453	456.536				65.2359	50.4378	61.6441	39.0315	38.36	16.4358	21.1542	328.574	5.47623	0.863878	0.0758653	123.332	-494.74	7.209
IVGNm00724	AK149150	mRNA									2347	498	467510	469857	6	0.005	0.212	2.556			6					uc008twi.1		Pde4b	complete cds.,Mus musculus cAMP-specific phosphodiesterase (Pde4b) mRNA	705.221	0.3	988.453				109.248	108.492	99.1193	80.9362	59.9236	36.7319	34.3156	330.622	5.51037	0.989909	0.0192099	232.178	574.001	6.839
IVGNm00725	AK149164	ncRNA				AB038662,AB038663,AB038664,AB038665,AB038666,AB038667,AF475069,AF475070,AF475071,AF475072,AF475073,AF475074,AF475075,AF475076,AF475077,AF475078,AK034465,AK048796,AK134467,AK173075,BC079881,NM_001163348,NM_001163349,NM_001163350,NM_001163351,NM_030699,NM_133488	AK173075				3750			3751		1	0				3									726.122	0.194	-7.247																	6.366
IVGNm00726	AK009919,AK033430,AK081236,AK150620,AK153354	mRNA						AK138965	AK082040		3474	188		3474		1	0.126		2		22			2						700.869	0.249	-66.5903				462.094	412.889	401.755	361.205	282.512	245.313	200.251	351.075	5.85125	0.982443	0.0243815	223.41	819.202	5.396
IVGNm00727	AK033430,AK049484,AK081236,AK150620,AK153354,AK161317,NM_144902	mRNA						AK138965			4027	981	37456	41483	7	0.089	0.126	1.91	2		22	2		2		uc008rcp.1	NM_144902	Slc35a3	solute carrier family 35	1684.66	0.43	415.163				78.3979	57.3655	81.9617	57.6003	55.8417	37.3032	38.0439	463.583	7.72638	0.716343	0.0970662	115.778	-231.322
IVGNm00728	AB261159,AK005479,AK136131,AK150377,AK150892,AK153075,BC011072,NM_028053	mRNA									2838	879	33113	35951	5	0.026	0.309	5.688	1		5		2	1		uc008sxh.1	NM_028053	Tmem38b	transmembrane protein 38B	939.402	0.678	353.23				169.512	153.102	178.184	143.042	117.644	78.1385	60.495	624.012	10.4002	0.93402	0.0361556	248.988	-1232.75	10.542
IVGNm00729	AF439557,AK151329,AK151467,AK153551	mRNA									1583	1041	14478	15508	4	0.066	0.492	3.883	1	1	1					uc008rdr.1	NM_028456	Rwdd3	RWD domain containing 3	680.555	0.661	343.925
IVGNm00730	AK133866,AK141210,AK143650,AK148521,AK152128,BC024100,BC031297,NM_146145,S63728	mRNA			AK029114,AK029232,NM_183024						5299	3459	108011	113309	24	0.029	0.543	6.285			5	3	1		6	uc008tvk.1	NM_146145	Jak1	Janus kinase 1	3557.23	0.875	4254.18				227.738	205.225	245.809	257.907	228.709	139.575	66.3381	1336.88	22.2813	0.855813	1.00916	2726.42	885.552
IVGNm00731	AF038546,AJ002386,AJ223208,AK028366,AK150274,AK150758,AK150842,AK152191,AK152618,AK153540,BC002125,BC011104,NM_021281	mRNA									1352	1029	28263	29615	7	0.043	0	5.56					1	1		uc008qjz.1,uc008qka.1	NM_021281	Ctss	cathepsin S preproprotein	755.316	0.607	750.682																	6.464
IVGNm00732	AK153710	ncRNA				AB093240,AK088871,AK153827,AK153848,BC060031,BC096600,NM_020007	AK153827				2811			2811		1	0				7				4					99.468	0.035	25.2862																	12.618
IVGNm00733	AK020402,AK028914,AK153760,BC167247,NM_001081326	mRNA						AK138965			9625	4596	58543	68168	33	0.074	0.333	6.958	2		11		1	1	6	uc008rcq.1,uc008rcr.1	NM_001081326	Agl	6-glucosidase,amylo-1	4973.16	0.949	3135.48				192.737	197.647	194.362	174.128	121.316	55.0307	34.6501	601.901	10.0317	0.966012	0.025837	295.311	-15758.4
IVGNm00734	AK153812,BC055377,M90388,NM_008979	mRNA									2760	2409	49693	52453	22	0.051	0.777	7.971			3		1			uc008qtu.1,uc008qtv.1	NM_008979	Ptpn22	RIKEN full-length enriched library, clone:C920004C21 product:protein tyrosine phosphatase, full insert sequence., non-receptor type, non-receptor type 8,Mus musculus 2 days neonate thymus thymic cells cDNA,protein tyrosine phosphatase	1631.66	0.6	-54.3835																	11.435
IVGNm00735	AF163668,AJ132394,AK137866,AK153941,AK160122,BC014804,NM_011281,U39071,U43508	mRNA		AK040387							2892	1548	22911	25803	10	0.076	0.355	5.305	1	1	1		1	2		uc008qfy.1,uc008qfz.1	NM_011281	Rorc	RAR-related orphan receptor gamma	1609.54	0.739	2071.01																	6.449
IVGNm00736	AK043943,AK129248,AK154156,AK155372,BC026986,BC076603,NM_029570	mRNA									4864	3525	97275	102139	29	0.04	0.612	6.944			16	2	1	1		uc008oys.1,uc008oyt.1,uc008oyu.1	NM_029570	Atp11b	Class VI, type 11B,ATPase	4059.17	0.869	1306.88				36.9242	28.1738	44.9552	36.861	36.6699	24.2405	30.6002
IVGNm00737	AK154541	mRNA									1829	443		1830		1	0.242				9									105.716	0.058	-964.432																	6.86
IVGNm00738	AK154852,AK155793,AK160989,AK164159,AK166315,AK172052,NM_001040690	mRNA									3663	1821	145654	149294	15	0.015	0.497	6.17	1		5	2	2	3	9	uc008rnr.1,uc008rnt.1,uc008rnu.1	NM_001040690	Rap1gds1	GTP-GDP DISSOCIATION STIMULATOR 1 homolog [Mus musculus], GTP-GDP dissociation stimulator 1 isoform, RIKEN full-length enriched library, clone:D230048N11 product:SIMILAR TO RAP1, full insert sequence.,Mus musculus 12 days embryo eyeball cDNA,RAP1	2592.07	0.952	1135.72				66.5243	54.8396	79.3496	68.114	56.0129	35.6013	33.2987	1091.82	18.197	0.704671	0.0781067	163.125	-232.642	10.309
IVGNm00739	AK028258,AK155456,BC057893,NM_173033	mRNA		NM_001033201	AK137060,BC106850						3725	1485	20717	23729	10	0.119	0.399	3.393			5		1	1		uc008stg.1,uc008sth.1	NM_173033	BC057893	hypothetical protein LOC272027	1425.5	0.487	1719.59				30.3869	22.0283	38.1068	23.5837	19.789	13.1442	16.7515							7.814
IVGNm00740	AK155776	mRNA									726	351	30120	30846	2	0.024	0.483	2.755					1	1						217.487	0.3	-436.974																	6.952
IVGNm00741	AK155784,AK171443	mRNA						AK181344			4331	1821	5896	10026	3	0.412	0.395	0.693	2	1	3	3		6		uc008pza.1,uc008pzb.1	NM_009565	Zbtb7b	RIKEN full-length enriched library, clone:G530111D19 product:zinc finger protein 67, full insert sequence.,Mus musculus bone marrow macrophage cDNA,zinc finger and BTB domain containing 7B	3255.66	0.764	2616.3
IVGNm00742	AK155936,AK156150	ncRNA				AB093240,AF231110,AK038242,AK153827,AK153848,BC060031,BC096600,NM_020007	AK153827				3980			3994		1	0		4		15			1						235.603	0.084																		6.229
IVGNm00743	AB246709,AB246710,AK156101,AK163844,AK180196,AK209108,AK213242,AK217766,AK219535,BC003294,BC013058,NM_001160016,NM_001160017,NM_008142,U29055	mRNA			AK186182						3140	1020	90685	93441	11	0.023	0.582	7.371			8	2	3	2		uc008wdp.1,uc008wdq.1,uc008wdr.1,uc008wds.1	NM_008142	Gnb1	beta-1,guanine nucleotide-binding protein	2151.75	0.99	1721.52				14703	15904.3	16078.3	17222	12545.7	9201.19	3582.59	1215.01	20.2502	0.928831	49.985	1851.31	904.228
IVGNm00744	AK156121	ncRNA	TRUE								4216		20	4240	1	0.995	0	0.237			8		1							349.971	0.083	-24.0678																	5.616
IVGNm00745	AK156275	ncRNA									3892		883134	887026	2	0.004	0	0.514			6									102.203	0.026	-3.5781																	4.786
IVGNm00746	AK156639	ncRNA	TRUE								870			871		1	0				1									42.674	0.049																		5.139
IVGNm00747	AK156763	ncRNA	TRUE								3506			3507		1	0		1		13									88.396	0.025	-8.9245																	6.005
IVGNm00749	AK157171	ncRNA	TRUE								2352		24	2377	1	0.99	0	0.425			6									139.769	0.059	17.0513																	11.13
IVGNm00750	AK157319	ncRNA	TRUE								3286		471	3782	1	0.875	0	0.304	2		16									82.89	0.025	-0.7844																	6.699
IVGNm00751	AK036438,AK036476,AK038141,AK089812,AK155902,AK157640,AK171824,BC057863,NM_010208,X16440,X52191	mRNA						AK089106			4121	1551	24446	28572	12	0.071	0.376	6.469			3	1	2	1	2	uc008vcb.1	NM_010208	Fgr	proto-oncogene tyrosine-protein kinase Fgr	1553.76	0.752	2104.62																	5.641
IVGNm00752	AK158013	mRNA					AK006330				3108		59	3172	1	0.981	0	0.322			3									479.768	0.154	-61.9688																	5.488
IVGNm00753	AK158189	ncRNA		AK166231		AK147159	AK147159				1519		16381	17900	1	0.085	0	0.658			2				9	uc008pqq.1		AK158189	RIKEN full-length enriched library, clone:F930039H20 product:unclassifiable, full insert sequence.,Mus musculus adult inner ear cDNA	173.204	0.114	13.3741																	5.959
IVGNm00754	AK010697,AK141298,AK155934,AK158314,AK169982,BC021369,NM_021461,Y11091	mRNA					AK141298				4353	1263	37510	40028	14	0.04	0.478	7.412			3	1	1	3		uc008ufl.1,uc008ufm.1,uc008ufn.1	NM_021461	Mknk1	MAP kinase-interacting serine/threonine kinase	1682.98	0.748	1599.07																	8.338
IVGNm00755	AK158454,BC150904,DQ002405,NM_001018031	mRNA									2157	1449	18935	21092	4	0.1	0.67	1.905			6		1	1		uc008pmo.1	NM_001018031	Gm414	otolin-1	791.801	0.384	1378.83																	8.254
IVGNm00756	AK158508	ncRNA				AK083116,AK122433,NM_138666	AK122433			BC098461,NM_001163387	501			501		1	0													358.438	0.715																		5.349
IVGNm00757	AK158510	ncRNA				AK031655,AK138987,AK141181,AK142411,AK142974,AK164239,BC115772,NM_009472,U72634	AK142974				2797			2797		1	0		1		4				1					315.768	0.113	-80.6938																	15.004
IVGNm00758	AF034860,AJ010902,AK041671,AK144794,AK158766,BC126929,NM_010569	mRNA		AK151497	AK047651						5858	3186	146582	152152	19	0.022	0.147	4.029			3	2	1	1		uc008sva.1,uc008svb.1,uc008svc.1	NM_010569	Invs	RIKEN full-length enriched library, clone:K230320F07 product:inversin, full insert sequence.,Invs protein.,Visual cortex cDNA,inversin	2759.01	0.641	1366.39																	6.002
IVGNm00759	AK075863,AK158914,BC031720,NM_172702	mRNA									1880	1500	20214	22090	9	0.083	0.63	4.899					1			uc008uzc.1	NM_172702	Serinc2	tumor differentially expressed 2-like	1138.22	0.619	1550.66				60.2971	59.1342	77.353	52.8295	46.8109	25.9482	22.951	655.793	10.9299	0.813195	0.0641606	172.17	-362.522	9.625
IVGNm00760	AK158936	mRNA						AK080525	BC117094		4004		6702	10707	11	0.374	0	2.747			1									2978.18	0.744	203.921																	6.332
IVGNm00761	AK014835,AK043248,AK160035,BC062957,DQ336396,NM_001042611,NM_007752,U49430	mRNA									4564	3258	47985	51739	19	0.073	0.386	5.378			6	1	1	1	3	uc008orz.1,uc008osa.1,uc008osb.1,uc008osc.1,uc008osd.1	NM_001042611,NM_007752	Cp	ceruloplasmin isoform a,ceruloplasmin isoform b	2575.72	0.694	1583.26																	7.63
IVGNm00762	AK009762,AK160178,AK160512,AK167006,AY221962,BC020031,NM_026416	mRNA									1061	375	4768	5776	2	0.173	0.351	2.584					1	1		uc008qcw.1,uc008qcx.1	NM_026416	S100a16	S100 calcium binding protein A16	440.859	0.834	768.245				113.992	81.5061	120.95	100.418	102.635	80.324	69.0521							10.802
IVGNm00763	AK160761	mRNA		NM_057172							1581		30188	31769	1	0.05	0	0.633			4		1	1						117.554	0.074	-17.8754																	14.683
IVGNm00764	AK053989,AK160805,BC111898,BC113188,NM_001165965,NM_177091	mRNA									4864	2214	31467	36331	12	0.087	0.539	3.679	1		2		3	3		uc008qzu.1,uc008qzv.1	NM_177091	Fndc7	RIKEN full-length enriched library, clone:E230011A21 product:hypothetical Fibronectin type III domain/ATP/GTP-binding site motif A (P-loop) containing protein, full insert sequence.,Mus musculus 2 days pregnant adult female oviduct cDNA,fibronectin type III domain containing 7	1984.11	0.582	1639.06																	6.019
IVGNm00765	AK017735,AK139489,AK160961,BC117717,BC117718,NM_001033155	mRNA									3577	1140	39406	41257	7	0.023	0.133	5.891	1	1	4	1	1	2		uc008rmq.1,uc008rmr.1		Dnajb14	RIKEN full-length enriched library, clone:4022416A05 product:weakly similar to BA265F14.5 (Novel protein similar to DNAJ)., member 14., subfamily B,15 days embryo head cDNA,DnaJ (Hsp40) homolog	1407.17	0.851	2244.42				42.3362	42.5472	49.3355	32.7134	29.4171	16.2212	20.2107	364.824	6.08041	0.838828	0.0778959	125.923	-406.63	9.955
IVGNm00766	AK134241,AK161063,AK161974,AK163729,AK173272,BC016603,BC043695,NM_001038696,NM_026043	mRNA		AK009169							4928	1542	22847	25083	14	0.073	0.313	8.13	1	1	16	1	1	1		uc008rbd.1,uc008rbe.1,uc008rbf.1,uc008rbg.1	NM_001038696,NM_026043	Rnpc3	RRM) containing 3,RNA-binding region (RNP1	1769.02	0.865	1272.28				1039.57	941.548	804.364	555.646	260.623	178.388	121.964	215.621	3.59368	0.99194	0.0242599	159.812	331.323	9.69
IVGNm00767	AK016513,AK161073	mRNA		AK163347					AK170145		2430		18498	20928	3	0.054	0	3.937	2		5		1	6		uc008pkp.1,uc008pkq.1		AK016513,AK161073	RIKEN full-length enriched library, clone:4931440P22 product:unclassifiable, full insert sequence.,Mus musculus adult male testis cDNA	641.691	0.264	89.2728																	7.209
IVGNm00768	AK004938,AK028181,AK043260,AK050234,AK075725,AK150784,AK161041,AK161084,AK166161,AK169740,AK212728,BC004053,BC020024,BC107687,NM_001122896,NM_001122897,NM_010470,X99642	mRNA									3444	1662	23470	26544	12	0.068	0.162	7.101	1	1	19	1	1			uc008vkg.1,uc008vkh.1,uc008vki.1,uc008vkj.1,uc008vkk.1,uc008vkl.1	NM_010470	Hp1bp3	binding protein 3,heterochromatin protein 1	2675.59	1.003	1522.05				85.4356	112.544	102.496	89.9383	75.7713	49.0812	39.8721	739.644	12.3274	0.865355	0.0510489	210.084	-486.384	9.987
IVGNm00769	AK029552,AK135678,AK161171,AK164420,NM_177859	mRNA									6142	2025	40049	42652	11	0.048	0.213	6.949			10	2	3	2		uc008qzp.1,uc008qzq.1		4921525H12Rik,AK164420,Aknad1	RIKEN full-length enriched library, clone:4921525H12 product:weakly similar to HYPOTHETICAL 44.5 KDA PROTEIN [Macaca fascicularis], clone:4921525H12 product:weakly similar to HYPOTHETICAL 44.5 kDa PROTEIN., full insert sequence.,Adult male testis cDNA,Mus musculus adult male testis cDNA	878.522	0.267	-327.303																	7.006
IVGNm00770	AK015018,AK161421,BC107404,BC107405,NM_001163494,NM_027612	mRNA		AK015480							2447	1338	58063	60418	8	0.031	0.439	4.698			6	4	1	2		uc008txp.1		4921539E11Rik	RIKEN full-length enriched library, clone:4921539E11 product:hypothetical protein, full insert sequence.,Adult male testis cDNA	276.896	0.123	-664.106																	7.856
IVGNm00771	AK034174,AK038404,AK087909,AK161440,BC086674,NM_173382	mRNA		AK162824							4472	2742	13618	18090	12	0.104	0.339	6.656	2		7	2	1	1		uc008peu.1,uc008pev.1	NM_173382	2810046L04Rik	RIKEN full-length enriched library, clone:4930591M24 product:Similar to NT2RM4002189 protein homolog.,Adult male testis cDNA,hypothetical protein LOC212127	1986.38	0.668	3222.1																	6.755
IVGNm00772	AK019784,AK161442	mRNA		AK004953,NM_001146328							3261	2255	63682	64364	3	0.011	0.463	4.399			4	1	2	2						221.992	0.068	-72.0701
IVGNm00773	AB041655,AK002653,AK007387,AK032680,AK050508,AK075776,AK144732,AK148485,AK149786,AK150005,AK150025,AK150368,AK150428,AK150659,AK150714,AK150770,AK150809,AK151323,AK151384,AK151456,AK151669,AK151853,AK152373,AK152383,AK152583,AK152636,AK152806,AK152882,AK152996,AK153056,AK153118,AK153138,AK153286,AK153415,AK153456,AK159271,AK161595,AK166004,AK166052,AK167482,AK167952,AK168046,AK168569,AK168734,AK1…	mRNA		AK145275							2545	211	1465	4010	2	0.15	0.346	7.752	1		5	2	2	1		uc008phs.1	NM_030685	D3Ucla1	stress-associated endoplasmic reticulum protein	1339.77	1.004	269.777				2485.95	2886.58	2180.76	2114.91	1415.79	614.692	254.248	502.309	8.37182	0.967381	0.0272352	262.535	5793.66	12.407
IVGNm00774	AK161599	mRNA		AK149976				X51976			1464		5452	6916	1	0.212	0	0.683	1		5		1	2		uc008pze.1		AK161599	RIKEN full-length enriched library, clone:9230018K07 product:hypothetical protein, full insert sequence.,Mus musculus adult male epididymis cDNA	524.076	0.358	85.5293				122.78	153.922	119.625	105.808	89.2817	69.249	79.8254	237.442	3.95737	0.8458	0.105693	88.7504	-351.561	8.589
IVGNm00775	AK161785,AY324187,BC050848,NM_175554	mRNA									4937	3945	31942	36879	25	0.111	0.511	6.293			3	1	1	1		uc008utn.1	NM_175554	Clspn	claspin	3266.88	0.662	2682.41				295.01	282.667	195.614	97.2011	56.3505	41.1	41.7157	131.451	2.19084	0.988328	0.0464267	93.3982	221.828	7.235
IVGNm00776	AK141181,AK161806,NM_009472,U72634	mRNA		AK035802							9353	2850	360081	369359	16	0.025	0.3	1.725			17	3	1	1		uc008roe.1,uc008rof.1	NM_009472	Unc5c	unc-5 homolog C	3759.41	0.402	3851.63				1795.79	1558.12	1259.78	898.761	490.488	253.64	153.586	213.672	3.5612	0.997995	0.0121586	182.091	258.506	9.283
IVGNm00777	AK003811,AK006133,AK009030,AK009524,AK161818,AK167461,AK186646,AK202605,AK216861,BC011065,BC028257,NM_025500	mRNA		AK042316							1486	1272	9497	10983	6	0.077	0.617	5.797			1	1	1	1		uc008tza.1	NM_025500	Mrpl37	mitochondrial ribosomal protein L37	959.752	0.727	2103.49				878.463	1059.83	1113.81	1013.29	663.173	302.14	174.081	703.37	11.7228	0.877939	0.0498919	210.416	-523.826	10.998
IVGNm00778	AK161849,AK165224	mRNA		AK041636	NM_008246				BC050110		4262	1680	31653	35915	17	0.119	0	3.989	1	1	7	1	1	1						2047.63	0.48	968.025				63.1767	48.0787	41.7129	20.9937	14.049	8.41441	10.6942	132.199	2.20332	0.974452	0.0687894	82.2592	336.472	5.705
IVGNm00779	AB093240,AF231110,AK038242,AK162039,BC060031,NM_020007	mRNA				AK153827	AK153827				5580	1143	122994	128497	9	0.03	0.189	1.727	2	1	19	5	1	2	8	uc008pjc.1,uc008pje.1,uc008pjg.1,uc008pjh.1	NM_020007	Mbnl1	Muscleblind-like protein (Triplet-expansion RNA-binding protein).,muscleblind-like 1	5350.04	0.973	863.319				33.3196	23.1812	38.7673	22.6237	20.6862	15.2102	18.6739							9.178
IVGNm00780	AF095718,AK041655,AK050624,AK050650,AK135738,AK137348,AK162210,AK207246,BC010255,NM_019550	mRNA									3427	1596	61286	64713	13	0.013	0.199	10.076			13	1	1	2		uc008rdj.1,uc008rdk.1,uc008rdl.1	NM_019550	Ptbp2	polypyrimidine tract binding protein 2	3400.25	1.012	821.703				39.7812	34.4385	44.1382	36.9115	36.8595	22.6906	31.3427							9.175
IVGNm00781	AK162420	mRNA						BC051576			1577	393	25033	26610	1	0.059	0.249	0.634			4									527.362	0.334	240.018				27.4809	23.483	23.9013	19.5604	16.56	11.46	15.9648	204.296	3.40494	0.894207	0.0971051	87.8925	-629.792	6.328
IVGNm00782	AB075603,AK036838,AK087859,AK162551,AK169673,AK208613,BC019507,BC039762,BC051048,BC057901,BC094388,BC132301,BC144749,NM_133858,NM_199475	mRNA		AK053118,AK188185	AK003395,NM_023628						2846	1407	10423	13242	9	0.066	0.323	11.765					1	1	5	uc008qjc.1,uc008qjd.1,uc008qje.1	NM_133858	4930504E06Rik,Fam63a	hypothetical protein LOC75007	1442.16	0.977	1662.13				151.485	149.849	159.607	99.8146	58.9365	29.4032	27.068	311.061	5.18435	0.939261	0.0506065	151.67	-6110.36
IVGNm00783	AB093240,AF231110,AK149405,AK153827,AK153848,AK162986,BC060031,BC096600,NM_020007	mRNA			BC037510		AK153827				5580	1143	152216	156639	9	0.012	0	1.989	2	1	11	3	1	1	8	uc008pjb.1,uc008pjc.1,uc008pjd.1,uc008pje.1,uc008pjf.1,uc008pjh.1	NM_020007	Mbnl1	Mbnl1 protein.,Muscleblind-like protein (Triplet-expansion RNA-binding protein).,muscleblind-like 1	5350.04	0.973	863.319				104.932	82.4268	114.737	72.8727	64.1864	43.2264	37.5138	433.427	7.22378	0.810043	0.0774407	133.742	-349.321	10.954
IVGNm00784	AK163154	ncRNA				AB221627,AF247132,NM_138679	NM_138679	X51976			3766		2825	6592	1	0.571	0	0.266	2		7		1		2					512.429	0.136	-0.3643																	5.132
IVGNm00785	AK006668,AK043853,AK049010,AK078362,AK163185,AK224940,AK224959,AK224961,BC114436,NM_029286	mRNA									2623	1962	89162	91683	14	0.026	0.603	5.885			3	1	4	4		uc008uma.1,uc008umb.1,uc008umc.1,uc008umd.1,uc008ume.1	NM_029286	1700041C02Rik	RIKEN full-length enriched library, clone:1700041C02 product:RIKEN cDNA 1700041C02.,Adult male testis cDNA,hypothetical protein LOC73332	1023.93	0.643	349.876																	6.473
IVGNm00786	AK045938,AK163199	ncRNA				AK031655,AK034558,AK035038,AK141181,AK142411,AK142974,AK164239,BC115772,NM_009472,U72634	AK035038				2249			2249		1	0		1		6									59.07	0.048	10.748				62.773	23.0321	24.3169	15.3035	10.4535	6.42236	5.5593	13.8834	0.231391	0.900578	1.47805	5.85817	-37.5302	14.48
IVGNm00787	AK044448,AK163358,AK173217,BC061928,NM_172861	mRNA									8762	2316	98624	107386	7	0.028	0.264	2.472			10	3	2	4		uc008ovx.1,uc008ovy.1	NM_172861	Slc7a14	member 14,solute carrier family 7	2968	0.829	2705.74				71.7542	80.3452	84.3348	60.8614	44.403	17.8003	16.8418	464.445	7.74076	0.916154	0.0466203	189.917	-1042.5	8.002
IVGNm00788	AK048319,AK139419,AK148728,AK150122,AK150134,AK163585,AK193506,AK204631,AK216103,BC054533,J02626,NM_001164198,NM_001164199,NM_001164200,NM_011100	mRNA									4324	1197	79040	83352	9	0.005	0.235	9.317	1		9	1	1	1	3	uc008rrs.1,uc008rrt.1,uc008rru.1,uc008rrv.1	NM_011100	Prkacb	beta, beta-catalytic subunit (EC 2.7.11.11) (PKA C-beta)., cAMP dependent, catalytic,cAMP-dependent protein kinase,protein kinase	2755.27	1.013	983.378				108.444	115.183	110.383	117.584	110.811	69.4676	53.5521	1694.94	28.2489	0.87703	0.344701	3167.75	1157
IVGNm00789	AK163839,AY521455,BC137995,D32137,NM_007696	mRNA		AK037892							2566	2166	22532	25098	17	0.102	0.4	6.625					1			uc008qvq.1	NM_007696	Ovgp1	oviductal glycoprotein 1	1671.81	0.652	1923.53				44.9886	43.448	52.6647	41.527	53.551	40.6179	57.0535							6.602
IVGNm00790	AK164224	mRNA									2124		36905	39029	1	0.054	0	0.471			2				4					336.484	0.158	-5.1872																	4.978
IVGNm00791	AB026808,AK133414,AK144169,AK158745,AK164082,AK164368,BC054526,NM_018804	mRNA		AK005385.2							4993	1290	25445	30438	4	0.05	0.258	2.461	1	1	1		2		11	uc008pwk.1,uc008pwl.1,uc008pwm.1	NM_018804	Syt11	synaptotagmin XI	2523.42	0.944	2430.93				83.8259	90.2646	82.028	54.1215	43.8559	20.7275	24.7541	281.317	4.68862	0.952279	0.0481585	147.716	2943.96	7.721
IVGNm00792	AF177211,AK039791,AK140301,AK155035,AK164982,BC028995,BC058558,NM_001008497,NM_133200	mRNA						AK047743			1992	1415	37253	38868	2	0.042	0.709	1.238			3	2	1			uc008pik.1,uc008pil.1,uc008pim.1,uc008pin.1	NM_001008497,NM_133200	P2ry14	P2Y14 receptor	604.087	0.312	2048.68																	6.485
IVGNm00793	AK077694,AK152138,AK153231,AK153944,AK165034,BC096469,NM_175224	mRNA									3692	1161	27874	30430	10	0.048	0.115	7.179	1		9		1			uc008rnl.1,uc008rnm.1	NM_175224	Metap1	RIKEN full-length enriched library, clone:5730526L06 product:methionyl aminopeptidase 1, full insert sequence.,Mus musculus 8 days embryo whole body cDNA,methionyl aminopeptidase 1	1640.43	0.893	876.338				33.4282	27.4763	37.019	16.2205	14.9153	7.58484	9.84083	254.574	4.2429	0.801628	0.116103	85.6231	-261.586	9.022
IVGNm00794	AF179566,AK143894,AK158241,AK165396,AK167578,BC023930,NM_013867	mRNA									3278	2460	107103	110381	11	0.026	0.491	3.822	2	2	3	3		3		uc008req.1	NM_013867	Bcar3	breast cancer anti-estrogen resistance 3	2311.47	0.76	3177.3				99.5666	70.3373	39.079	19.2304	14.7268	12.3863	13.056	64.0703	1.06784	0.99592	0.0588029	51.1941	85.6002
IVGNm00795	AJ000338,AK160121,AK165733,BC125281,BC125283,BC144768,D49658,NM_010713	mRNA		AK142074							1977	1104	22290	24267	8	0.053	0.311	6.462	1	1	3	1	1			uc008rum.1	NM_010713	Lhx8	LIM homeobox protein 8	1843.83	0.939	910.534																	6.218
IVGNm00796	AK034365,AK131150,AK132612,AK165882,BC060614,BC148610,BC153178,NM_001080755,NM_198416	mRNA									7600	2730	61328	67354	13	0.063	0.509	4.023			11	2	1	1		uc008rtm.1,uc008rtn.1,uc008rto.1,uc008rtp.1	NM_001080755,NM_198416	Zzz3	ZZ domain containing 3,zinc finger	4593.17	0.973	438.773				79.5229	63.6765	59.4032	36.2144	34.0383	23.02	29.2083	133.79	2.22983	0.950142	0.0961796	71.9668	949.199
IVGNm00797	AK034365,AK131150,AK132612,AK165882,BC060614,BC148610,BC153178,NM_001080755,NM_198416	mRNA									7600	2730	61328	67354	13	0.063	0.509	4.023			11	2	1	1		uc008rtm.1,uc008rtn.1,uc008rto.1,uc008rtp.1	NM_001080755,NM_198416	Zzz3	ZZ domain containing 3,zinc finger	4593.17	0.973	438.773				104.605	85.9886	78.0696	51.9062	40.9365	33.5923	32.7042	150.328	2.50546	0.979353	0.0544453	97.2113	331.411
IVGNm00798	AK086135,AK159316,AK163982,AK165547,AK165923,AX775987,BC023071,L36962,NM_001161824,NM_013604	mRNA		AK147184	BC006663						1519	1380	3736	5255	7	0.224	0.861	6.494			1		1			uc008pye.1,uc008pyf.1	NM_013604	Mtx1	metaxin 1	1005.05	0.863	2027.48				2015.03	2167.21	1942.68	1658.79	1208.88	604.88	394.733	487.48	8.12466	0.981957	0.0203918	293.022	1449.23	11.703
IVGNm00799	AK148321,AK166205	ncRNA	TRUE	NM_009877							2069		242160	244229	9	0.008	0	4.35			5		1	1		uc008toj.1		AK148321	RIKEN full-length enriched library, clone:G370089A13 product:unclassifiable, full insert sequence.,Mus musculus B16 F10Y cells cDNA	433.515	0.21	37.4711
IVGNm00800	AJ414610,AK037348,AK087339,AK166208,BC132533,BC145123,NM_001165954,NM_001165955,NM_001165956,NM_153421	mRNA									11051	2979	59266	70121	15	0.047	0.259	5.187			17	2	1	1		uc008ovl.1,uc008ovm.1,uc008ovn.1,uc008ovo.1,uc008ovp.1	NM_153421	Phc3	Mus musculus mRNA for polyhomeotic 3 protein (Phc3 gene).,polyhomeotic-like 3	4499.09	0.965	2189.03				27.986	16.5168	16.6886	9.98565	11.1956	8.76704	14.1462	18.2777	0.304629	0.839738	1.38709	6.78828	-26.3921	7.305
IVGNm00801	AK015872,AK032055,AK043975,AK166422,AK183064,AK183359,AK215008,BC019424,BC070431,NM_001127191,NM_029068	mRNA		AK084799				AK030650			2534	1035	20080	22308	7	0.021	0	9.259	1		5	2	1	1	6	uc008opw.1,uc008opx.1,uc008opy.1	NM_029068	Snx16	RIKEN full-length enriched library, clone:A830062B14 product:weakly similar to SORTING NEXIN 16.,10 days neonate cortex cDNA,sorting nexin 16	1307.87	0.905	680.648				515.819	496.511	293.5	161.814	87.9075	60.8477	65.294	116.571	1.94286	0.991484	0.0446454	86.5131	178.637	15.857
IVGNm00802	AK075573,AK144933,AK162693,AK167289,BC027770,D50464,NM_001113478,NM_009146	mRNA									2607	1776	41638	44184	17	0.053	0.567	6.92			6	1		1	11	uc008rcv.1,uc008rcw.1	NM_009146	Frrs1	ferric-chelate reductase 1	1405.38	0.618	375.646				248.335	235.93	226.198	197.913	176.583	126.27	95.8111	553.335	9.22225	0.994873	0.0102098	401.797	888.394	7.806
IVGNm00803	AK003362,AK008117,AK008961,AK013394,AK016190,AK019976,AK020157,AK167623,BC004736,BC025506,BC031730,NM_026591	mRNA			AK201266,BC023814						1180	653	2995	4121	5	0.23	0.377	5.599			3	2	1	1		uc008ptd.1,uc008pte.1,uc008ptf.1,uc008ptg.1	NM_026591	Mrpl24	mitochondrial ribosomal protein L24	670.081	0.73	1575.33				5375.18	6037.35	4765.5	3468.18	1848.09	1319.64	1317.01	224.706	3.7451	0.963593	0.0504581	127.897	924.469	13.318
IVGNm00804	AK032415,AK122383,AK132560,AK147482,AK168378,BC150740,NM_001081557,NM_001081558	mRNA		AK020331	AK046277						8448	5046	794207	802246	23	0.006	0.087	4.553	3		11	1	1	1	5	uc008vyk.1,uc008vyl.1,uc008vym.1,uc008vyn.1	NM_001081558	Camta1,mKIAA0833	RIKEN full-length enriched library, clone:6430540E03 product:MSTP023 homolog [Homo sapiens], full insert sequence.,Mus musculus adult male olfactory brain cDNA,calmodulin binding transcription activator 1	7555.11	0.917	4294.13																	8.278
IVGNm00805	AK028246,AK034819,AK083328,AK131979,AK158769,AK169530,BC038305,BC057543,NM_010703,X58636	mRNA		BC051212							3665	1191	111139	114034	11	0.012	0.142	8.641	1		10	3	1	1		uc008rjf.1,uc008rjg.1,uc008rjj.1,uc008rjk.1	NM_010703	Lef1	RIKEN full-length enriched library, clone:A630081F01 product:lymphoid enhancer binding factor 1, full insert sequence.,3 days neonate thymus cDNA,lymphoid enhancer binding factor 1	2445.99	0.943	1132.47				171.677	179.632	178.663	158.007	132.98	84.6813	70.0418	654.842	10.914	0.96165	0.026745	301.881	-3870.05	8.026
IVGNm00806	AF152841,AF152842,AK010253,AK011636,AK076096,AK083794,AK169568,BC005622,BC052156,BC158075,NM_019393	mRNA			AK135861,X75483						2479	1314	11507	13374	11	0.096	0.203	8.244	2	1	3	2	1	2	2	uc008ozl.1,uc008ozm.1,uc008ozn.1	NM_019393	Exosc9	complete cds.,Mus musculus strain BALB/c polymyositis scleroderma overlap syndrome (PM-SCL) antigen 1 a mRNA,exosome component 9	1314.99	0.92	1477.75				705.47	712.878	621.332	429.476	163.217	47.1376	37.8202	266.251	4.43752	0.978088	0.0336636	166.578	662.914	9.143
IVGNm00807	AK035136,AK081836,AK082594,AK170695,BC034119,BC040744,BC094598,BC140958,BC144807,NM_177462	mRNA									4914	3747	43054	46977	15	0.08	0.288	4.088			8	3	2	2	4	uc008uui.1,uc008uuj.1,uc008uuk.1,uc008uul.1	NM_177462	Zmym6	MYM-type 6, RIKEN full-length enriched library, clone:9430092L12 product:weakly similar to ZNF258 [Homo sapiens], full insert sequence.,Mus musculus 12 days embryo embryonic body between diaphragm region and neck cDNA,zinc finger	3153.35	0.802	693.95
IVGNm00808	AK171113,NR_027955	mRNA									1859		71	1930	1	0.963	0	0.538			2		1	1	3			4931440P22Rik		389.532	0.21																		15.578
IVGNm00809	AK152380,AK171765,NM_001083312,NM_145545	mRNA									5552	1914	14212	19746	10	0.28	0	1.807	1		7		1	1		uc008ros.1,uc008rot.1	NM_001083312,NM_145545	Gbp6	guanylate binding protein 7	1041.29	0.188	500.355																	13.987
IVGNm00810	AF393747,AF393780,AK034377,AK036663,AK155497,AK157953,AK169855,AK170581,AK171997,BC020105,BC038087,BC049350,BC058235,NM_001146323,NM_080634	mRNA									4075	3009	35751	39366	17	0.083	0.479	4.905	1	1	9	4	1	1		uc008ose.1,uc008osf.1,uc008osg.1	NM_080634	Hps3	complete cds.,Hermansky-Pudlak syndrome 3 homolog,Mus musculus Hermansky-Pudlak syndrome type-3 protein (Hps3) mRNA	2394.52	0.724	2829.68				47.2996	33.1334	54.285	37.5378	27.4009	18.2052	20.9503
IVGNm00811	AK035953,AK171857,AK172025	mRNA									4953	2064	92741	95358	2	0.024	0.375	0.872			5				6	uc008rxy.1,uc008rxz.1		Chd7	RIKEN full-length enriched library, clone:A730019I05 product:hypothetical protein, clone:F830031E22 product:hypothetical Proline-rich region profile/Glutamine-rich region profile containing protein, full insert sequence., full insert sequence. (Fragment).,7 days neonate cerebellum cDNA,Activated spleen cDNA	2358.9	0.921	2434.51				59.3349	94.7631	64.1446	58.014	68.0074	46.2994	82.2853							7.938
IVGNm00812	AF277893,AF501886,AK036816,AK098139,AK152227,AK155309,AK158965,AK167416,AK168302,AK169752,AK172147,AK195471,AK211063,BC028753,M63658,M87286,NM_013531,S86124	mRNA			AK133685						2896	1023	30257	33008	10	0.038	0	8.811	2	1	3	1				uc008owl.1,uc008owm.1	NM_013531	Gnb4	beta-4, complete cds.,Mus musculus G-protein beta-4 subunit mRNA,guanine nucleotide-binding protein	1199.06	0.981	1388.26				979.907	1031.69	1013.74	914.979	752.902	429.468	222.16	855.422	14.257	0.974712	0.0203936	395.182	-5196.17
IVGNm00813	AB117644,AK017887,AK133220,AK148837,AK172159,AK172895,BC116738,BC119130,NM_029077	mRNA		AK040634,AK164782							3176	1323	27866	31042	5	0.044	0.274	4.129			3	1	1	1		uc008stw.1,uc008stx.1,uc008sty.1	NM_029077	Trim14	PU.1 binding protein Pub	991.305	0.605	1341.35																	8.035
IVGNm00814	AK172188,NM_057172	mRNA		AK160761	NM_199465				AK028418		6491	1926	19882	26373	19	0.246	0	2.927	2		12		2	4		uc008rta.1	NM_057172	Fubp1	far upstream element (FUSE) binding protein 1	5789.16	0.892	422.533				283.912	274.249	258.061	225.247	170.182	140.187	106.871	386.092	6.43486	0.993089	0.0142899	282.163	611.221
IVGNm00815	AK160815,AK172188,NM_057172	mRNA		AK160761	NM_199465				AK028418		6491	1926	21781	26373	21	0.174	0	4.577	2		12		2	4		uc008rsz.1,uc008rta.1	NM_057172	Fubp1	far upstream element (FUSE) binding protein 1	5789.16	0.972	422.533				1725.82	1586.21	1653.43	1384.46	1114.39	942.248	602.704	597.781	9.96301	0.974443	0.0223624	315.881	5556.91	8.485
IVGNm00816	AK089650,AK172422	ncRNA				AK079224,NM_019957	AK079224	AK050425			2363			2364		1	0				4									421.204	0.178	-7.2934																	5.027
IVGNm00817	AK172492	mRNA					NM_001111096				3331		8085	11432	1	0.293	0	0.3			8									345.268	0.104	27.18																	6.354
IVGNm00819	AK012246,AK015308,AK016619,AK017763,AK030130,AK030203,AK031605,AK034346,AK035570,AK041095,AK044266,AK134539,AK173315,BC021448,BC024847,BC138212,BC145944,NM_025978,NM_027619	mRNA									11314	2298	7166	16444	11	0.167	0.106	7.241	3		25	1	1	2	5	uc008oxa.1,uc008oxc.1,uc008oxd.1,uc008oxe.1,uc008oxf.1,uc008oxg.1,uc008oxh.1	NM_025978,NM_027619	Ttc14	Tetratricopeptide repeat protein 14 (TPR repeat protein 14).,tetratricopeptide repeat domain 14 isoform a,tetratricopeptide repeat domain 14 isoform b	3582.72	0.917	1068.89				204.551	257.063	246.423	201.839	194.207	132.228	140.954	509.889	8.49815	0.774657	0.0794462	137.646	-299.171	10.741
IVGNm00820	AK028361,AK083176,AY190610,BC048783,L21768,NM_001159964,NM_007943	mRNA									4990	2691	102422	107352	24	0.028	0.292	8.103	1		10	3	1	2		uc008ucf.1,uc008ucg.1	NM_007943	Eps15	epidermal growth factor receptor pathway	3871.03	0.924	688.057				123.917	99.8575	141.199	121.594	109.768	75.1959	65.155	1836.49	30.6082	0.713559	0.0736254	183.16	-228.798	6.955
IVGNm00821	AY351591	mRNA									2533	762	20311	22844	12	0.111	0.301	4.737			3	1	1	2		uc008ruc.1	NM_031870	Msh4	mutS homolog 4	1604.06	0.633	379.316																	5.436
IVGNm00822	AY512952	mRNA									3420	319	1777	5199	2	0.658	0.093	0.585			19	3	5	5						404.754	0.118																		14.07
IVGNm00823	AK129405,AK138876,AK143201,AK168693,AY769435,AY769436,AY769437,AY769438,BC043930,BC108273,BC130227,NM_001039081,NM_027696	mRNA		AK043370,AK078168							4758	1668	46530	51285	14	0.029	0.239	9.756	3	2	7	1	1	4	5	uc008txd.1,uc008txe.1,uc008txf.1,uc008txg.1,uc008txh.1,uc008txi.1	NM_001039081,NM_027696	Mier1	mesoderm induction early response 1 isoform a,mesoderm induction early response 1 isoform b	3344.21	0.994	942.085				61.3949	70.6303	54.4317	35.2983	36.2591	18.8046	24.9497	201.594	3.35991	0.90802	0.0909283	90.6554	-901.01
IVGNm00824	AF005036,AF295403,AK135335,AK146204,AK160549,BC002021,EU599046,EU599047,NM_011886	mRNA						X51976			2687	2298	15126	17725	19	0.147	0.621	7.449			1	1	1	1		uc008pxw.1,uc008pxx.1	NM_011886	Scamp3	secretory carrier membrane protein 3	2333.65	0.868	1679.04				999.992	1141.78	1130.99	1092.11	779.857	362.101	205.601	755.082	12.5847	0.916094	0.0397161	251.523	-753.544	13.772
IVGNm00825	BC002148	mRNA									2071	345		2071		1	0.167				2	1								399.476	0.193	-445.185																	9.517
IVGNm00826	AK011726,AK017814,AK034978,AK148748,AK152244,AK163288,AK170052,BC002279,NM_024194	mRNA		AK040467	AK032571			BC051584			4092	1806	27940	31776	14	0.068	0.3	6.917			10	2	1	1		uc008rvu.1,uc008rvv.1	NM_024194	Lrrc40	RIKEN full-length enriched library, clone:F630013B15 product:hypothetical protein, clone:I830057H11 product:hypothetical Leucine-rich repeat containing protein, full insert sequence) (Bone marrow macrophage cDNA, full insert sequence).,Lrrc40 protein (NOD-derived CD11c +ve dendritic cells cDNA,leucine rich repeat containing 40	2657.04	0.76	1413.08				299.36	268.034	293.863	250.875	151.072	85.7114	60.7275	470.711	7.84519	0.950125	0.0350674	223.938	-4616.14
IVGNm00827	AK142472,BC005659,BC006585,NM_001168356,NM_134253	mRNA			AK007306						1697	1068	8341	9901	9	0.15	0.538	6.72			1			1		uc008qix.1,uc008qiy.1	NM_134253	Bnipl	BCL2/adenovirus E1B 19kD interacting protein	875.127	0.685	984.28																	6.44
IVGNm00828	AK032897,AK048488,AK050391,AK078856,AK082575,AK131608,AK161812,AK163839,AK168006,AK168752,AK169128,BC005755,NM_027432	mRNA		AK037892,NM_009725							4286	1029	22532	25098	17	0.102	0.123	6.625	1	1	2		1	1		uc008qvp.1	NM_027432	Wdr77	WD repeat domain 77	1671.81	0.652	1923.53				1594.98	1697.36	1418.97	1126.93	590.591	302.032	242.106	297.905	4.96508	0.980297	0.0291583	188.559	709.127
IVGNm00829	AK011540,AK080690,AK088675,AK142685,AK164825,AK168075,BC008995,BC067392,BC147501,NM_001163617,NM_001163618,NM_027931	mRNA									3614	2172	12879	15004	17	0.135	0.286	7.515					1	1		uc008qkq.1,uc008qkr.1,uc008qks.1,uc008qkt.1,uc008qku.1	NM_027931	Tars2	RIKEN full-length enriched library, clone:2610024N01 product:similar to THREONYL-TRNA SYNTHETASE (HYPOTHETICAL 81.0 KDA PROTEIN) [Homo sapiens], full insert sequence.,Mus musculus 10 days embryo whole body cDNA,threonyl-tRNA synthetase-like 1	1587.04	0.7	3486.51				860.866	981.581	880.229	762.04	548.618	278.913	205.855	502.249	8.37082	0.96174	0.029584	252.14	62373.3	10.268
IVGNm00830	AF061743,AK032958,AK087137,AK151419,BC008980,BC010972,BC013540,NM_001172424,NM_011303,X95281	mRNA									2492	906	33590	35383	6	0.039	0.285	4.448			2		1	1		uc008vrm.1,uc008vrn.1,uc008vro.1	NM_011303	Dhrs3	complete cds.,Mus musculus retinal short-chain dehydrogenase/reductase retSDR1 mRNA,dehydrogenase/reductase (SDR family) member 3	1221.95	0.757	1976.98																	8.108
IVGNm00831	AK005825,AK018786,AK020098,AK048527,AK050256,AK153513,AK166967,AY043239,BC013627,BC023382,BC037062,NM_026602	mRNA									3878	680	6031	7444	6	0.125	0.108	6.961	1		3		3	3		uc008qsu.1	NM_026602	Bcas2	breast carcinoma amplified sequence 2	878.539	0.726	1177.17				2722.92	3023.63	2574.46	2269.06	1468.83	964.452	480.748	467.527	7.79212	0.978325	0.0228608	272.845	1632.02	10.873
IVGNm00832	AB009459,AK050052,AK149421,BC013893,NM_001003893	mRNA			AK032199,AK083312						3112	2055	9878	12937	10	0.173	0.316	4.38			2	2	1	1		uc008vuy.1,uc008vuz.1	NM_001003893	Masp2	mannan-binding lectin serine protease 2 isoform	1114.95	0.495	1854.97				58.6448	55.5116	94.7724	76.8609	93.6666	68.2353	76.1162							6.823
IVGNm00833	AK155481,AY158701,BC016215,BC117925,NM_144899	mRNA									3974	3111	7799	11655	17	0.331	0.511	4.458			1	1	1			uc008qkm.1,uc008qkn.1	NM_144899	Adamtsl4	ADAMTS-like 4	2121.77	0.564	2948.29																	7.055
IVGNm00834	AK085707,AK142666,BC017681,BC060741,BC092277,J00380,NM_010113,V00741	mRNA									4748	3654	73042	77739	24	0.053	0.767	5.643	1		5	5	1	1		uc008rih.1	NM_010113	Egf	epidermal growth factor	1699.47	0.398	-57.09																	5.982
IVGNm00835	AK002300,AK032908,AK167673,AK168119,AK168132,BC018236,BC055930,NM_008525,U89407,X13752	mRNA		AK044938							1770	993	9544	10894	11	0.11	0.324	11.438			1			1		uc008tez.1,uc008tfa.1	NM_008525	Alad	dehydratase, delta-,aminolevulinate	973.269	0.917	2393.72				5746.34	6141	5951.88	4802.46	2484.66	676.595	361.229	399.017	6.65028	0.954925	0.0371322	200.598	36711.7	13.52
IVGNm00836	AF335512,AK077640,AK087489,AK144633,BC019935,BC047123,NM_133231	mRNA									2162	612	2515	4677	2	0.292	0.569	1.932			1	1	2	1		uc008pfw.1	NM_133231	Rfxap	regulatory factor X-associated protein	756.616	0.548	1255.45				1147.8	1205.1	605.555	255.225	114.578	90.5152	102.086	105.459	1.75765	0.97091	0.0923869	63.8974	301.688	8.196
IVGNm00837	AK021256,AK075923,AK167001,BC021873,BC048685,NM_026578	mRNA									1190	696	5250	6410	7	0.161	0.576	6.189					1	1		uc008rim.1	NM_026578	Nola1	member 1,nucleolar protein family A	717.841	0.694	575.029				2366.19	2352.39	1974.26	1431.18	821.609	418.367	296.786	266.38	4.43966	0.993895	0.0176194	202.827	387.931	8.665
IVGNm00838	AJ557515,AK014082,BC022603,NM_027126	mRNA									2021	1260	2011	4032	3	0.5	0.324	1.49			2	1	1			uc008qna.1		Hfe2	Hemojuvelin precursor (Hemochromatosis type 2 protein homolog) (RGM domain family member C).	1287.25	0.639	1859.7																	9.846
IVGNm00839	AF228502,AK006339,AK016342,AK151401,BC012511,BC022740,BC049556,NM_026358,NR_028121	mRNA									1429	852	6905	8135	3	0.147	0.577	2.523			3	3	1	1		uc008pdw.1,uc008pdx.1	NM_026358	4930583H14Rik	4930583H14Rik protein.,ovary-specific acidic protein	288.696	0.235	422.322				196.869	188.868	200.37	162.287	129.133	89.7601	62.2183	569.083	9.48472	0.972272	0.0237516	299.146	5828.46	8.606
IVGNm00840	AB221661,AF265229,AF438610,AK005270,AK012055,AK136976,BC002321,BC023257,BC045160,NM_023178	mRNA			BC027139			AF177147.2			1862	1407	6027	7573	10	0.138	0.158	7.084	1	1						uc008uiw.1	NM_023178	Dmap1	DNMT1 associated protein-1	1456.38	0.978	2833.82				587.419	614.534	481.875	303.028	121.072	64.8217	58.864	207.586	3.45977	0.979645	0.040119	133.412	467.518	10.292
IVGNm00841	AF480411,AK158381,AY017368,AY243095,BC023765,NM_001170985,NM_130867	mRNA									7287	2367	88872	96156	15	0.024	0.325	6.334			5	1	1	1		uc008prv.1,uc008prw.1,uc008prx.1	NM_130867	Kirrel	X kin of IRRE like 1	3209.89	0.904	939.909
IVGNm00842	BC024335	mRNA									1759	390	2134	3893	4	0.452	0.222	2.274			4		1	1		uc008oxp.1		Dnajc19	Mitochondrial import inner membrane translocase subunit TIM14 (DnaJ homolog subfamily C member 19).	503.066	0.286	-26.0107																	12.932
IVGNm00843	AK007064,AK015318,AK016883,AK016917,AK029525,BC025002,EU846100,NM_028946	mRNA									2221	1695	47546	49767	12	0.036	0.215	6.194	1	1	3	2	1	1	2	uc008rlf.1,uc008rlg.1,uc008rlh.1,uc008rli.1,uc008rlj.1	NM_028946	4933425K02Rik,Nhedc1	RIKEN full-length enriched library, clone:1700094G20 product:hypothetical Glutamic acid-rich region profile containing protein, clone:4921513J18 product:hypothetical Glutamic acid-rich region/Na+/H+ exchanger containing protein, clone:4930434P15 product:hypothetical Glutamic acid-rich region profile containing protein, full insert sequence (Adult male testis cDNA, full insert sequence)., full ins…	725.463	0.393	331.796
IVGNm00844	AK012269,AK016642,BC006700,BC025430,NM_025863	mRNA			BC005507						2840	2034	6538	9378	2	0.197	0.673	1.288	2		3	1	1	1		uc008pmc.1,uc008pmd.1	NM_025863	Trim59	mouse RING finger 1	1276.85	0.713	1041.31				178.466	208.248	92.0341	61.8762	50.0413	39.237	42.3015	94.2328	1.57055	0.919594	0.177572	44.5105	-804.792	8.336
IVGNm00845	AK076732,AK160155,BC025528,NM_001040399	mRNA									1705	1008	25458	27163	9	0.058	0.589	5.758	1		2	1	1	2		uc008pca.1	NM_001040399	Larp2	member 2,La ribonucleoprotein domain family	1510.34	0.944	709.931				303.457	340.135	365.553	249.478	155.49	60.7791	43.7104	440.808	7.34681	0.915779	0.0480461	182.612	-1065	8.569
IVGNm00846	AK132759,AK202945,AK205505,AK208605,AK209495,AK212661,AK216309,AY486147,BC025640,NM_026869	mRNA						X51976			3198	1218	1670	4868	2	0.131	0.953	5.208					1	1		uc008pzo.1,uc008pzp.1,uc008pzq.1	NM_026869	Pygo2	pygopus 2	1584.72	0.988	1609.35																	8.567
IVGNm00847	AK030480,BC026153,NM_010141,X79082,X81466	mRNA									4306	2994	147635	151929	16	0.023	0.695	5.736	1	1	7	2			6	uc008sen.1	NM_010141	Epha7	Eph receptor A7	4137.04	0.991	2676.31				121.345	118.284	73.8809	72.112	87.5408	64.6115	139.58							7.218
IVGNm00848	AF009515,AF100171,AK007292,AK133448,BC027526,NM_001039543,NM_010801	mRNA									1161	846	24788	25904	7	0.034	0.601	6.936					1	1		uc008plk.1,uc008pll.1	NM_001039543,NM_010801	Mlf1	myeloid leukemia factor 1 isoform a,myeloid leukemia factor 1 isoform b	835.77	0.774	369.809				34.7544	28.5791	35.7115	22.8584	16.778	11.5342	11.3736	305.703	5.09505	0.882186	0.0736866	122.094	-606.749	7.948
IVGNm00849	BC027582	mRNA									875	507		876		1	0.579				2	2		1	4					118.351	0.135	-4.9423																	9.239
IVGNm00850	AK003607,AK013477,AK150483,AK168358,BC028659,NM_026784,NM_027348	mRNA						X51976			1159	579	13491	14466	4	0.067	0.36	4.044			2		1	1		uc008pzs.1,uc008pzt.1	NM_026784	Pmvk	phosphomevalonate kinase	456.194	0.461	1219.5				3564.8	3647.1	3357.62	2955.51	2173.27	1513.93	820.606	567.599	9.45999	0.993411	0.0114659	395.685	1003.66	9.378
IVGNm00851	AK013948,BC028867,NM_001163573,NM_027013	mRNA		NM_153121	AF177174						862	684	3617	4294	6	0.158	0.647	7.386			1		1	1		uc008qid.1	NM_027013	Scnm1	sodium channel modifier 1	549.059	0.701	909.684				422.771	387.968	267.821	139.617	97.371	68.9883	65.7858	123.498	2.0583	0.992937	0.0383369	93.8382	180.572	11.038
IVGNm00852	AK015177,AK046429,AK156938,BC030185,BC079891,BC082599,NM_197997	mRNA		NM_138593							8081	5589	57487	64535	25	0.109	0	4.237			17	4	1	2		uc008rhf.1,uc008rhg.1,uc008rhh.1		4930422G04Rik	RIKEN full-length enriched library, clone:4930422G04 product:RIKEN cDNA 4930422G04 gene, full insert sequence.,Mus musculus adult male testis cDNA	2466.63	0.56	1435.52				734.041	575.338	475.999	389.631	324.459	252.069	164.555	176.534	2.94223	0.950546	0.0735291	94.577	1322.98	8.152
IVGNm00853	AF003234,AK050185,BC028254,BC031117,D89677,NM_001082414	mRNA									6407	2370	82855	87632	20	0.055	0.264	4.19	1		10	5	1	1		uc008pra.1,uc008prb.1	NM_001082414	Sh3d19	SH3 domain protein D19	2928.3	0.614	1373.03
IVGNm00854	AK040867,AK149935,AK153304,AK171025,AK172222,BC035203,CT010349,NM_001029837,NM_001164049,NM_001164050,NM_001164051,NM_001164052,NM_008840,U86587	mRNA			BC031629						5068	3141	47589	52430	24	0.092	0.585	6.692			4	1	1	1		uc008vwq.1,uc008vwr.1,uc008vws.1,uc008vwt.1,uc008vwu.1,uc008vwv.1,uc008vww.1	NM_001029837,NM_008840	Pik3cd	phosphatidylinositol 3-kinase catalytic delta	3220.95	0.914	5042.82				31.3235	25.6123	31.3936	16.0351	14.4264	11.9176	15.9302							6.786
IVGNm00855	AK034956,AK048561,AK079349,BC037727,BC112419,BC113795,BC118964,NM_001163732,NM_172869	mRNA									3787	1788	186568	188612	14	0.01	0.45	7.172			7		1	1	3	uc008tjg.1,uc008tjh.1	NM_172869	Frmd3	FERM domain containing 3	2274.83	0.892	718.367																	8.104
IVGNm00858	AK005419,AK087683,AK164441,BC043107,BC060107,BC137590,NM_001081320,NM_028061	mRNA									4677	687	1006	5442	2	0.644	0.11	1.098			2		1	1		uc008qyi.1,uc008qyj.1,uc008qyk.1	NM_001081320,NM_028061	Cyb561d1	cytochrome b-561 domain containing 1 isoform 1,cytochrome b-561 domain containing 1 isoform 2	1539.89	0.35	1029.87				25.0484	23.2569	26.8586	17.8539	19.1918	10.8528	12.8458	370.66	6.17766	0.818939	0.082688	121.683	-354.32	6.96
IVGNm00859	AB154826,AB286960,AK077467,AK077909,BC045150,NM_172701	mRNA									2182	1167	28618	30770	10	0.047	0.528	6.316					1	1		uc008ush.1,uc008usi.1	NM_172701	1810007P19Rik	oxidored-nitro domain-containing protein	1149.06	0.679	1482.09				193.064	188.405	188.559	136.342	77.4847	37.4489	28.5985	340.896	5.6816	0.969291	0.0331352	194.343	1386.28	8.444
IVGNm00860	AK044501,AK161929,BC009152,BC025817,BC046769,NM_177041	mRNA									3000	1554	7860	10860	8	0.198	0.225	4.042					1	1	6	uc008pzh.1,uc008pzi.1,uc008pzj.1	NM_177041	Flad1	FAD-synthetase	1384.44	0.721	1939.99				700.239	796.653	649.026	418.138	188.391	111.388	115.773	228.45	3.80751	0.955484	0.0552339	123.997	1449.41	10.387
IVGNm00861	AK007060,AK148512,BC048560,NM_028567	mRNA									3097	318	4989	7327	5	0.203	0.087	4.8			3	1	2	4		uc008qbe.1		1700094D03Rik	Uncharacterized protein C1orf189 homolog.	568.904	0.379	377.382				193.871	172.808	201.964	167.173	163.743	141.06	154.549							8.348
IVGNm00862	AB060589,AF202896,AK028321,AK045420,BC048789,BC079630,NM_019967	mRNA									4090	2280	189672	193026	7	0.016	0.235	2.634	1		7	1	1	1		uc008thw.1,uc008thx.1	NM_019967	Dbc1	deleted in bladder cancer chromosome region	3087.86	0.992	3901.84																	6.958
IVGNm00863	AK039325,AK049513,AK140829,AK164951,AK169552,BC024524,BC049092,BC050192,BC057618,BC060149,NM_001159595,NM_178112	mRNA			AF106691,AK167428,BC053727						4676	2988	51668	55072	27	0.05	0.13	10.638	4	2	12	5	2	2	7	uc008rzg.1,uc008rzh.1	NM_178112	Ints8	integrator complex subunit 8	3912.69	0.998	2305.43				2271.87	2339.57	1742.34	1038.21	395.645	234.765	182.663	186.145	3.10241	0.983822	0.0393746	124.988	364.493	11.641
IVGNm00864	AK006492,AK011690,AK014770,AK053369,BC005798,BC023760,BC049156,NM_026319	mRNA									2114	1800	76600	78714	19	0.019	0.61	11.06			7	2	1	1		uc008tsg.1	NM_026319	Ift74	coiled-coil domain containing 2	1770.58	0.913	909.119				160.356	192.46	159.572	98.7372	62.5627	25.2004	26.6049	266.883	4.44805	0.94415	0.0545952	135.287	9783.22	10.071
IVGNm00865	AK013032,AK018492,AK150724,AK150995,AK151201,AK151915,AK152326,AK154338,BC049571,NM_025779	mRNA						BC038176			1298	1040	54090	55227	7	0.021	0.665	5.988			1		1	1		uc008rir.1,uc008ris.1	NM_025779	Ccdc109b	11 days embryo whole body cDNA, CLONE KAT02147 (HYPOTHETICAL 28.8 KDA PROTEIN) [Homo sapiens], RIKEN full-length enriched library, clone:2810407G08 product:weakly similar to CDNA FLJ20647 FIS, full insert sequence.,Mus musculus 10,coiled-coil domain containing 109B	451.867	0.412	558.565				2198.17	2371.78	1885.98	1633.41	1009.02	585.804	373.346	341.462	5.69103	0.985443	0.0225994	225.362	704.293	12.102
IVGNm00866	BC050824,D13738,NM_013690,S67051,X67553,X71426	mRNA									4654	3369	131139	135643	22	0.026	0.616	6.304	2		8	3	1			uc008tsj.1,uc008tsk.1	NM_013690	Tek	endothelial-specific receptor tyrosine kinase	3690.23	0.927	513.464				38.0564	29.7287	45.2348	35.5345	34.4012	18.126	14.7534	1300.31	21.6718	0.723462	0.0739717	175.212	-239.851	6.615
IVGNm00867	AF020339,AF297083,AK139406,AK147128,BC050945,BC056995,NM_001161796,NM_017469	mRNA									3234	1860	39474	42708	13	0.048	0.565	6.26	1		5	2	1	1		uc008por.1,uc008pos.1	NM_017469	Gucy1b3	beta 3, soluble,Gucy1b3 protein.,guanylate cyclase 1	1999.02	0.891	2468.18				76.6161	70.2257	97.6081	71.6139	53.9259	24.6665	19.4511	722.683	12.0447	0.828751	0.0591823	187.452	-389.523	6.597
IVGNm00868	AF034080,AK040619,AK077551,AK085503,AK134404,AK188604,BC023128,BC050988,BC051252,NM_001165949,NM_018812,NM_146135	mRNA		AK086824	AK031193,NM_030094						2938	1884	6752	9538	14	0.199	0	12.987	1		4		1		2	uc008qnt.1,uc008qnu.1,uc008qnv.1,uc008qnw.1	NM_018812,NM_146135	Pias3	protein inhibitor of activated STAT 3 isoform 1,protein inhibitor of activated STAT 3 isoform 2	2157.83	0.974	2246.03				70.9037	59.4778	78.6122	58.1572	49.2446	28.8634	31.6042	473.256	7.8876	0.815439	0.072619	143.657	-365.634	6.776
IVGNm00869	AK019076,AK172955,BC052065,NM_001081155	mRNA		AK007899							3218	2187	61894	65100	24	0.049	0.481	7.509			2	1	1	1		uc008vjm.1,uc008vjn.1,uc008vjo.1	NM_001081155	Rap1gap	Rap1 GTPase-activating protein,Rap1gap protein.	2428.16	0.756	2282.47																	7.164
IVGNm00870	AF140786,AF367244,AF387811,AK031367,AK035944,AK147153,AK165168,BC035529,BC052387,NM_026079	mRNA		NM_001081420							5032	3999	46502	51524	36	0.079	0.417	8.439			3	2	1	1		uc008sxr.1	NM_026079	Ikbkap	inhibitor of kappa light polypeptide enhancer in	3210.61	0.754	2336.01				151.142	186.869	190.436	165.22	129.977	58.107	35.605	781.886	13.0314	0.888017	0.0461466	229.375	-555.013	9.223
IVGNm00871	AK150135,AK154857,BC051431,BC052708,NM_016981,U51112	mRNA									4606	2469	49924	53927	12	0.072	0.534	3.087			1		1	1		uc008vcs.1	NM_016981	Slc9a1	solute carrier family 9 (sodium/hydrogen	3031.71	0.705	3124.72				46.3658	40.8048	51.4402	33.0367	30.3744	17.3877	23.5702	314.054	5.23423	0.790783	0.101629	100.312	-277.737	9.519
IVGNm00872	AK032960,AK044648,AK046586,AK079532,AK083273,AK083470,AK134914,AK144731,AK166011,AK166331,AK168955,AK169886,BC012234,BC052771,NM_001145876,NM_178696,NR_027357	mRNA									3577	999	11182	14644	3	0.176	0.216	1.269			1		1	1	3	uc008pvc.1,uc008pvd.1,uc008pve.1	NM_178696	Slc25a44	member 44,solute carrier family 25	1205.22	0.446	1717.94				29.4679	26.7683	32.2134	17.632	15.2583	11.1918	13.3829							9.019
IVGNm00873	AK043637,AK044979,AK132716,AK139908,BC040387,BC052858,NM_172525	mRNA									5090	3801	57738	62828	22	0.059	0.57	7.594	2	1	16	2		1		uc008reh.1,uc008rei.1,uc008rej.1	NM_172525	Arhgap29	RIKEN full-length enriched library, clone:A830014I19 product:weakly similar to PTPL1-ASSOCIATED RHOGAP [Homo sapiens], full insert sequence.,Mus musculus 10 days neonate cortex cDNA,Rho GTPase activating protein 29	3459.13	0.917	2761.76																	13.999
IVGNm00874	AK131721,AK132970,AK154393,AK167322,AK214993,BC053006,D00314,J03880,NM_022305	mRNA						BC029303			3976	1200	45421	49397	5	0.023	0.301	5.865			1	1	1	1		uc008shw.1	NM_022305	B4galt1	4-,UDP-Gal:betaGlcNAc beta 1	1755.18	0.944	1361.86				27.6107	18.4969	22.1475	10.8498	13.3634	6.81589	8.36317	171.235	2.85391	0.815204	0.157881	61.0501	-212.761	6.168
IVGNm00875	AK015003,BC028997,BC042647,BC055056,BC139279,BC139280,BC171970,NM_027617	mRNA		NM_010318							2681	1335	40631	42551	14	0.043	0.128	8.414			7	1	1	1	11	uc008rri.1,uc008rrj.1	NM_027617	Spata1	Spata1 protein.,spermatogenesis associated 1	1199.56	0.681	56.461																	7.814
IVGNm00876	AK016436,AK172415,BC034875,BC056359,BC058415,NM_025739	mRNA						AF177147.2			2891	1701	222561	225452	14	0.013	0.399	6.08	2				1			uc008uim.1,uc008uin.1,uc008uio.1,uc008uip.1	NM_025739	4931406I20Rik	hypothetical protein LOC66743	2571.91	0.89	1523.3				1154.04	1293.9	1173.49	856.425	435.63	253.868	210.349	308.649	5.14416	0.9514	0.0452428	159.737	4554.98	11.532
IVGNm00877	AF285091,AK052367,AK143522,AK195202,BC056975,EU797522,NM_133187	mRNA		AK132613							3980	1572	53722	57702	3	0.053	0	3.968	1		10	1	1	1		uc008pny.1	NM_133187	1110032E23Rik	hypothetical protein LOC68659	1189.68	0.921	899.622																	7.245
IVGNm00878	AK019578,AK030259,AK044506,AK087536,AY165052,BC031740,BC057553,NM_172434	mRNA									3351	1482	11445	13861	13	0.174	0.281	5.257	1	1	1	1	1	1		uc008qgl.1,uc008qgm.1,uc008qgo.1,uc008qgp.1,uc008qgq.1	NM_172434	Celf3,Tnrc4	RIKEN full-length enriched library, clone:4930415M08 product:RNA-BINDING PROTEIN BRUNOL1 (FRAGMENT) homolog [Homo sapiens], full insert sequence.,CUG-BP and ETR-3 like factor 3,Mus musculus adult male testis cDNA	2283.1	0.834	1535.08				155.965	147.218	195.731	158.139	111.423	79.7787	77.3997	593.594	9.89323	0.759951	0.0778042	145.374	-284.94
IVGNm00879	AF231926,AK159902,BC003948,BC057661,BC145323,BC145325,BC145326,NR_028094,NR_028095,NR_028096,NR_028097	mRNA									1992	471	4258	5678	9	0.25	0.199	7.086			4	4	1	1		uc008ruf.1,uc008ruh.1,uc008rui.1		Rabggtb	alternatively spliced, beta subunit (Rabggtb) mRNA, complete cds.,Mus musculus Rab geranylgeranyl transferase	1237.2	0.898	619.655				726.414	477.28	366.798	338.76	310.068	328.358	370.434	20.5812	0.34302	0.981728	0.385675	13.4525	43.7817	13.381
IVGNm00880	AF024621,AK132642,AK160446,BC057957,NM_008076	mRNA									1931	1470	30934	32867	8	0.055	0.701	4.432			2		1	1		uc008sfq.1	NM_008076	Gabrr2	gamma-aminobutyric acid (GABA-C) receptor	1344.93	0.724	2702.06																	5.5
IVGNm00881	AB085692,BC058224,BC080859,BC138667,BC138668,BC140135,BC140175,BC143035,BC143150,NM_153156	mRNA									1762	864	17996	19758	6	0.046	0.997	6.961			3		1	1		uc008pew.1	NM_153156	Stoml3	stomatin (Epb7.2)-like 3	735.305	0.791	1557.93																	5.754
IVGNm00882	AK010412,AK011704,AK150357,AK165960,BC014704,BC051443,BC058755,CT010359,NM_010937,X13664	mRNA									4470	579	7255	9630	8	0.125	0.127	5.319	1		5	1	1	2		uc008qsm.1,uc008qsn.1	NM_010937	Nras	RIKEN full-length enriched library, clone:2410005F23 product:NEUROBLASTOMA RAS ONCOGENE homolog [Mus musculus], full insert sequence.,Mus musculus ES cells cDNA,neuroblastoma ras oncogene	1704.42	1.006	859.967				1225	1408.9	1226.35	1162.22	940.431	701.343	460.433	778.259	12.971	0.963924	0.0247305	340.61	-2731.72
IVGNm00883	AJ005985,AK006149,AK011334,AK019170,AK149726,AK161290,BC020533,BC058802,BC059724,NM_001026212,NM_019561	mRNA									2276	363	5962	7138	3	0.058	0.154	8.197	2		2	1	1	1		uc008qki.1,uc008qkj.1,uc008qkk.1	NM_001026212,NM_019561	Ensa	Ensa protein.,endosulfine alpha isoform a,endosulfine alpha isoform b	1106.87	1.008	445.054				207.843	212.075	237.986	211.736	202.595	177.245	132.184	2417.53	40.2922	0.891269	0.430269	4268.9	1686.23	10.772
IVGNm00884	AB078338,AK017846,AK083829,AK152396,AK153563,AK173230,BC053082,BC059838,NM_001177995,NM_027504	mRNA		AK083203,AK140029							8605	3825	312316	320749	16	0.014	0.048	4.003	3	1	6	1	1	1	5	uc008wbs.1,uc008wbt.1,uc008wbu.1,uc008wbv.1,uc008wbw.1,uc008wbx.1	NM_027504	Prdm16,mel1	complete cds.,Mus musculus mel1 mRNA for transcription factor MEL1,Prdm16 protein.,transcription factor MEL1	3953.6	0.676	2986.77
IVGNm00885	AK034533,AK041928,AK052841,BC060502,NM_001163455,NM_173032	mRNA		NM_007926							3396	2679	150967	154363	25	0.022	0.092	9.071			7	2	1	1		uc008rjy.1,uc008rjz.1	NM_173032	A630047E20Rik,Tbck	A630047E20Rik protein.,hypothetical protein LOC271981	2566.79	0.863	2096.5																	7.25
IVGNm00886	AK032420,BC061098,NM_001177856	mRNA									2954	636	37564	40518	4	0.062	0.215	1.603	1		3		1			uc008ryo.1		Asph	Asph protein.	1223.53	0.436	700.554				125.144	108.761	128.684	100.83	87.6291	57.7252	44.8266	623.901	10.3984	0.926605	0.0382875	240.45	-1049.06
IVGNm00887	AJ401160,AK003395,AK010128,BC062140,NM_001085383,NM_023628	mRNA			BC008112,BC144749						1874	1035	9230	11083	13	0.153	0.552	8.07					2	3		uc008qjg.1,uc008qjh.1	NM_001085383,NM_023628	Anxa9	annexin A9	871.753	0.483	776.278				32.8762	31.8093	51.5636	39.5141	47.9864	30.2227	38.8684							7.992
IVGNm00888	AK015146,AK138405,BC062244,NM_027271,NM_028667	mRNA		NM_001081411							4128	576	13000	16772	7	0.036	0.06	8.13	2		9	1	1	2		uc008pcr.1,uc008pct.1,uc008pcw.1	NM_027271,NM_028667	D3Ertd751e	hypothetical protein LOC73852 isoform a,hypothetical protein LOC73852 isoform b	921.869	0.591	217.713																	5.812
IVGNm00889	AK012700,AK015146,AK039725,AK044548,AK045813,AK085404,AK138405,AK144064,BC062244,NM_001099785,NM_027271,NM_028667	mRNA		NM_001081411							4128	576	15275	16772	7	0.036	0.06	8.13	2		9	2	1	2		uc008pcr.1,uc008pcs.1,uc008pct.1,uc008pcu.1,uc008pcv.1,uc008pcw.1	NM_001099785,NM_027271,NM_028667	D3Ertd751e	hypothetical protein LOC73852 isoform a,hypothetical protein LOC73852 isoform b	921.869	0.591	217.713
IVGNm00890	BC063104	mRNA									2619	1650	28606	31225	6	0.084	0.63	2.291			2	1	1	1		uc008pkc.1	NM_015728	Slc33a1	solute carrier family 33 (acetyl-CoA	1629.01	0.622	2515.7				110.76	73.9119	62.3069	23.2249	12.5082	11.5961	13.3968	98.4322	1.64054	0.960379	0.11649	55.7536	419.727
IVGNm00891	AK075609,AK132260,AK148486,AK167024,AK168238,AK168877,AK169238,AK169261,AK208263,BC028833,BC064712,D29639,NM_008212	mRNA			AK206850,AK213488			BC038703			1721	945	36894	38615	7	0.035	0.356	10.309					2	1		uc008rjl.1	NM_008212	Hadh	L-3-hydroxyacyl-Coenzyme A dehydrogenase	772.167	0.685	1586.07				1035.38	938.309	1098.4	1026.02	935.403	746.327	382.281	1551.13	25.8522	0.934884	2.42893	2307.19	1168.29	10.423
IVGNm00892	AK135906,AK157542,BC065088,BC138991,BC138992,NM_001013806	mRNA						BC051584			4848	1623	57230	60106	13	0.029	0.168	7.558	1		16	8	1	1		uc008rvk.1,uc008rvl.1	NM_001013806	Ankrd13c	RIKEN full-length enriched library, clone:7420436A04 product:hypothetical Ankyrin containing protein, full insert sequence.,Mus musculus in vitro fertilized eggs cDNA,ankyrin repeat domain 13c	2520.91	0.938	1248.3				895.632	947.092	888.337	748.397	618.666	434.185	302.849	549.844	9.16407	0.985431	0.017337	336.01	1512.2	9.409
IVGNm00893	AF275549,AK028477,AK028670,AK030370,AK033121,AK051346,AK076078,BC065996,NM_023305	mRNA			NM_024241						2697	1506	38074	40771	6	0.049	0.292	3.079			2	1	1	1		uc008sin.1	NM_023305	Ubap1	ubiquitin-associated protein 1	2224.6	0.919	1130.22				169.569	140.067	73.4031	41.6294	39.5262	30.3646	37.5904	66.9496	1.11583	0.995183	0.0608087	52.6422	91.9366	10.524
IVGNm00894	AK146507,AK153296,AK160875,AK168982,AK169117,AK169124,AK169204,BC066055,NM_011863,U34883	mRNA									2762	1877	76304	78778	13	0.031	0.603	4.707			4	2	1	1		uc008rjr.1,uc008rjs.1,uc008rjt.1,uc008rju.1	NM_011863	Papss1	3'-phosphoadenosine 5'-phosphosulfate synthase	1796.63	0.729	2775.42				1510.75	1536.52	1541.1	1433.78	954.812	578.526	252.25	709.553	11.8259	0.968294	0.0238765	332.965	-5415.85
IVGNm00895	AK037355,AK083674,AK129150,AK134893,BC067054,NM_001081293	mRNA									8419	4407	50794	59081	10	0.113	0.305	1.551	2		13		1	1		uc008qkx.1,uc008qky.1,uc008qkz.1,uc008qla.1	NM_001081293	4930535B03Rik	RIKEN full-length enriched library, clone:6430510H01 product:hypothetical protein, full insert sequence. (Fragment).,Adult male olfactory brain cDNA,hypothetical protein LOC75137	5829.4	0.737	2120.11				34.4663	25.5001	34.4133	20.0999	24.3682	16.7237	17.3623							8.909
IVGNm00896	AK088093,AK090078,BC023720,BC053504,BC067202,BC071243,NM_027016	mRNA		AK016981							3966	1194	24422	28388	7	0.087	0.301	3.015	1		9	2	2	4		uc008ovh.1	NM_027016	Tloc1	translocation protein 1	2400.74	0.887	1069.18				740.939	555.301	636.598	406.942	184.645	92.8115	54.5172	273.445	4.55741	0.943775	0.053718	138.06	14110.9	10.672
IVGNm00897	AB221628,AF191211,BC068150,BC128307,BC128308,BC148436,BC156736,NM_015743	mRNA									2549	1881	35573	38122	7	0.059	0.953	2.746								uc008suu.1,uc008suw.1	NM_015743	Nr4a3	group A, member 3,nuclear receptor subfamily 4	2241.37	0.884	2327.57																	6.947
IVGNm00898	AK019886,AK029053,AK029104,AK029315,AK031444,AK044810,AK049842,AK077407,AK128912,AK159207,AK159977,BC018381,BC075615,NM_026582,NR_037590	mRNA									3303	1626	92793	96097	12	0.019	0.406	6.557	1	1	5	2	1		9	uc008rwc.1,uc008rwd.1,uc008rwe.1,uc008rwf.1	NM_026582	Gpr177,Wls	RIKEN full-length enriched library, clone:5031439A09 product:hypothetical protein, full insert sequence.,G protein-coupled receptor 177,Mus musculus 11 days pregnant adult female ovary and uterus cDNA	2233.6	0.931	2650.41				90.815	67.5628	103.672	84.5096	85.5087	75.0928	65.3356							11.192
IVGNm00899	AF326553,AF326554,AK052204,AK054310,AK137731,AK139357,AK173173,BC075702,BC122878,BC122880,D90172,D90173,D90174,D90175,D90176,NM_001122952,NM_001122953,NM_010905,U57633,Y07690,Y07691	mRNA		AK086199							9384	1596	527660	536934	12	0.005	0.149	6.215	2	1	8	1	1	1		uc008ttq.1,uc008tts.1,uc008ttt.1,uc008ttu.1,uc008ttv.1,uc008ttw.1	NM_010905	Nfia	nuclear factor I/A	7091.92	1	2093.37
IVGNm00900	BC075717	mRNA		AK015945							4450	909	2730	7180	9	0.62	0.204	2.022	1		5					uc008qhh.1		Rfx5	Rfx5 protein.	1942.95	0.437	563.877
IVGNm00901	AK014175,AK154817,AK167354,BC026738,BC076612,NM_001081343	mRNA		AK045932							3413	1443	31904	34839	10	0.077	0.36	3.404			6		1			uc008sgv.1,uc008sgw.1	NM_001081343	3110043O21Rik	Uncharacterized protein C9orf72 homolog.,hypothetical protein LOC73205	1989.77	0.627	1736.2				47.8756	31.6147	48.9385	31.4707	25.5397	12.5339	11.4796	441.889	7.36482	0.800397	0.0790122	132.664	-332.028	9.484
IVGNm00903	BC087882,NM_009725	mRNA		AK191398							1456	771	15930	17386	8	0.084	0.527	5.495			1	1				uc008qvm.1	NM_009725	Atp5f1	H+ transporting, mitochondrial F0,ATP synthase	898.41	0.617	562.594																	13.111
IVGNm00904	AB075603,AK036838,AK087859,AK162551,AK169673,AK208613,BC019507,BC039762,BC051048,BC057901,BC094388,BC132301,BC144749,NM_133858,NM_199475	mRNA		AK053118,AK188185	AK003395,NM_023628						2846	1407	10423	13242	9	0.066	0.323	11.765					1	1	5	uc008qjc.1,uc008qjd.1,uc008qje.1	NM_133858	4930504E06Rik,Fam63a	hypothetical protein LOC75007	1442.16	0.977	1662.13				152.634	154.295	157.071	102.947	61.5607	29.9617	29.9373	307.304	5.12173	0.949729	0.0462073	157.757	5905.34	9.72
IVGNm00905	AF200973,AK019370,AK028677,AK032016,AK159281,AK161866,BC031438,BC094444,NM_001163514,NM_001163515,NM_021388	mRNA		AK010008							2937	993	18631	21568	4	0.11	0.323	1.741			2	1	1	2		uc008rbu.1,uc008rbv.1,uc008rbw.1	NM_021388	Extl2	exotoses (multiple)-like 2	1228.51	0.494	1909.94				118.683	98.5813	67.2139	19.2007	11.5763	4.58377	10.4712	104.743	1.74572	0.98345	0.0697297	70.4113	204.413	7.774
IVGNm00906	AK005946,BC049763,BC100493,BC116222,BC116223,NM_029314	mRNA									653	504	6522	7175	4	0.083	0.772	6.757					1			uc008qze.1		1700013F07Rik	RIKEN full-length enriched library, clone:1700013F07 product:hypothetical protein, full insert sequence (RIKEN cDNA 1700013F07 gene).,Adult male testis cDNA	336.664	0.558	277.42				62.8431	64.0972	62.0524	48.8292	42.1535	24.7577	24.5983	389.001	6.48335	0.965184	0.032381	211.308	2445.29	6.962
IVGNm00907	AK005720,BC100519,BC116419,BC116420,NM_027941	mRNA		AK015024,BC145806							1882	1248	21712	23594	10	0.06	0.662	7.252			3	1	1	1		uc008ovb.1	NM_027941	Lrrc34	leucine rich repeat containing 34	847.1	0.649	316.767																	5.991
IVGNm00908	BC100538,NM_001039594	mRNA									549	505	395	944	1	0.582	0.92	1.821					1			uc008qev.1	NM_001039594	Lce3a	late cornified envelope 3A	162.687	0.296	84.4319				34.4188	28.4766	33.5612	26.8539	26.4196	14.2811	14.1315	586.065	9.76775	0.873421	0.0529483	190.8	-546.896	6.878
IVGNm00909	AJ245750,AK132994,BC100729,BC100730,BC100736,NM_011996	mRNA									1312	1134	14084	15396	8	0.079	0.862	6.65			3					uc008rnj.1	NM_011996	Adh4	pi,alcohol dehydrogenase 4 (class II)	759.631	0.625	561.729																	5.103
IVGNm00910	AK018621,BC104368,BC104369,NM_027843	mRNA									1200	579		1200		1	0.439				1			1				Arl14		436.148	0.481	1153.71																	6.722
IVGNm00911	AY158996,BC107019,NM_173070	mRNA									231	228		231		1	0.987									uc008qee.1	NM_173070	Sprr4	small proline-rich protein 4	144.349	0.625	-58.78																	11.453
IVGNm00912	BC107298	mRNA		AK031293							447	372	13659	14106	3	0.032	0.832	6.711						1		uc008puk.1	NM_029801	1700021C14Rik	SSTK-interacting protein	273.034	0.611	34.804				55.8669	60.277	58.1628	42.7965	45.6358	29.1359	46.6974
IVGNm00913	AK085699,BC107364,BC107365	mRNA									1634	420	17454	18791	5	0.058	0.171	3.06			4	1	1			uc008qmz.1		BC107364	BC107364 protein.	114.423	0.08	34.851																	8.848
IVGNm00914	AJ276067,AK028640,AK045369,BC110551,BC110552,NM_029330	mRNA		NM_028938							3492	1770	4968	8460	3	0.27	0.507	1.629			5		1	1		uc008ruu.1	NM_029330	Fpgt	fucose-1-phosphate guanylyltransferase	1490.15	0.771	644.649				45.9171	33.4041	26.7404	15.4643	15.4712	7.74839	13.753	89.5269	1.49212	0.949504	0.146263	47.7687	711.528	8.954
IVGNm00915	BC115807	mRNA			AK191418						559	417	4374	4933	3	0.113	0.746	5.367	1				1			uc008oql.1		1810022K09Rik	RIKEN cDNA 1810022K09 gene.	286.797	0.513	-33.2292				43.6381	41.9373	49.756	41.9801	44.4949	28.3189	34.4028							9.663
IVGNm00916	AK017735,BC117717,BC117718,NM_001033155	mRNA									1851	1140	39406	41257	7	0.032	0.279	5.364	1	1	1	1	1			uc008rmr.1		Dnajb14	member 14., subfamily B,DnaJ (Hsp40) homolog	1407.17	0.851	2244.42				158.333	143.718	154.625	114.937	89.2029	48.9304	40.5553	410.815	6.84691	0.964122	0.0318142	219.39	3222.79	11.6
IVGNm00917	AF014453,BC027668,BC031477,BC052523,BC117780,BC117781,BC128505,BC128506,BC129973,NM_001142959,NM_001142960	mRNA		AK138568							3144	1989	25932	29076	13	0.09	0	5.226	1		6		1	1		uc008qts.1,uc008qtt.1		Bcl2l15,Gm566	Gm566 protein (Fragment).,Gm566 protein.	2019.9	0.642	3407.33				29.7439	23.645	32.0435	23.21	31.7034	23.4846	30.4118
IVGNm00918	AK007760,BC058221,BC117998,EU004151,NM_001081229	mRNA									8916	2307	42715	51099	3	0.047	0.177	1.395			17	3	2	2		uc008php.1,uc008phq.1,uc008phr.1	NM_001081229	Tsc22d2	TSC22 domain family 2	4112.82	0.968	2015.21				77.1136	65.1569	45.5641	34.8589	35.4842	31.6068	36.8407	59.8322	0.997203	0.989415	0.10271	42.4263	101.455
IVGNm00919	AK041026,AY027660,BC118008,NM_133698	mRNA						AK144002			10658	9702	6569	13824	3	0.342	0.767	1.009			4		2			uc008qfg.1		Hrnr	RIKEN full-length enriched library, SIMILAR TO TRICHOHYALIN) (FRAGMENT) [Homo sapiens], clone:A530063N20 product:weakly similar to DJ14N1.2 (NOVEL S-100/ICABP TYPE CALCIUM BINDING DOMAIN PROTEIN, full insert sequence.,Mus musculus adult male aorta and vein cDNA	461.507	0.186	-168.053																	5.705
IVGNm00920	D10204	mRNA									2107	1098	75760	77867	3	0.027	0.521	1.424			1		1	2		uc008rvi.1		Ptger3	EP3 subtype (Prostanoid EP3 receptor) (PGE receptor, EP3 subtype).,Prostaglandin E2 receptor	1088.39	0.517	1120.48																	5.723
IVGNm00921	AF150755,AK122291,BC043319,DQ067088.2,NM_001199136,NM_001199137	mRNA									23495	22065	317314	334728	97	0.052	0.597	5.316	1	1	12	7	1			uc008upj.1,uc008upk.1,uc008upl.1		Macf,Macf1	complete cds.,MKIAA0465 protein (Fragment).,Macf1 protein (Fragment).,Mus musculus microtubule-actin crosslinking factor (Macf) mRNA	19790.1	0.978	17773.5				28.5033	23.4292	35.8991	28.0199	23.6155	18.7657	11.8346	1559.37	25.9896	0.726799	0.154737	6531.92	885.369
IVGNm00922	AK016704,BC120917,BC120918,DQ086115,NM_028937	mRNA									2341	1404	25574	27907	10	0.074	0.556	4.866					1	1		uc008pgi.1,uc008pgj.1	NM_028937	Sohlh2	spermatogenesis and oogenesis specific basic	756.843	0.333	452.502				1869.25	1658.94	1570.4	1350.46	1034.98	659.664	674.357	304.435	5.07391	0.984007	0.0257879	199.746	639.715	8.108
IVGNm00923	AK077172,BC055104,BC061167,M29603,NM_008574,S49659,S49660	mRNA									889	673	4270	5159	1	0.033	0	6.757			1	1	2	2		uc008qeg.1	NM_008574	Smcp	sperm mitochondria-associated cysteine-rich	149.302	0.273	235.358																	5.575
IVGNm00924	BC036291,BC085618,BC094353,M77174,NM_008305	mRNA			NM_001033979						14177	13149	87651	101828	96	0.139	0.556	6.772					1	1		uc008vjf.1		Hspg2	RIKEN full-length enriched library, clone:M5C1009L04 product:perlecan (heparan sulfate proteoglycan 2), full insert sequence.,Mus musculus 14 days pregnant adult female placenta cDNA	10929	0.771	15251.3				50.7693	37.0859	48.0612	36.2902	42.164	27.9124	37.8195							8.054
IVGNm00925	BC138538,BC138539,NM_177259,Y08379,Y08380	mRNA									5306	1665	371977	377283	15	0.006	0.314	6.303	1		3		1	1	2	uc008txw.1	NM_177259	Dab1	disabled homolog 1 isoform 2	3842.53	0.947	1723.66
IVGNm00926	AK144170,BC012252,NM_011895,Z71268	mRNA			AK028606						2028	1008	22143	24172	7	0.05	0.345	5.988			3	1	1			uc008sgh.1	NM_011895	Slc35a1	solute carrier family 35 (CMP-sialic acid	1430.15	0.868	1015.73				576.744	531.021	513.492	476.634	319.401	201.552	113.029	536.971	8.94951	0.986128	0.0170789	333.058	1384.8	8.726
IVGNm00927	AB050742,AB057754,AB057755,AB057756,AB057760,AB057761,AK051653,AK173212,BC145398,NM_001040085,NM_001040086,NM_001040087	mRNA									4823	3840	57984	61741	18	0.054	0.36	6.855			4	1	1			uc009iha.1,uc009ihc.1,uc009ihe.1,uc009ihg.1,uc009ihi.1,uc009ihj.1	NM_001040085,NM_001040086,NM_001040087	Sytl2	synaptotagmin-like 2 isoform 1,synaptotagmin-like 2 isoform 2,synaptotagmin-like 2 isoform 4	2431.89	0.965	1226.58
IVGNm00928	AF025310,BC118618,BC121827,NM_001077591,NM_011651	mRNA			AK087747						1830	1755	12971	14796	10	0.115	0.861	5.952					1			uc009gry.1,uc009grz.1	NM_001077591,NM_011651	Stk22s1	serine/threonine kinase 22 substrate 1 isoform	1512.63	0.832	2014.53																	6.451
IVGNm00929	AB019505,AF110802,AF110803,AF122907,AK003370,AK008452,AK009721,BC018332,CT010164,CT010334,NM_010531	mRNA			BC004667						2596	582	1704	3376	6	0.371	0.997	6.885			2	1	1	1		uc009iqd.1,uc009iqe.1,uc009iqf.1	NM_010531	Il18bp	interleukin 18 binding protein	336.137	0.429	63.9796				27.3871	21.2132	37.754	28.4089	35.4663	24.652	29.4416							6.469
IVGNm00930	AF132218,AF158597,BC141121,BC167249,NM_010473	mRNA			EU568871			AK137126			2430	2214	1310	3704	6	0.63	0.911	2.72			1		1			uc009gur.1	NM_010473	Hrc	histidine rich calcium binding protein	589.423	0.247	908.47																	8.929
IVGNm00931	AF294329,AK010805,AK012386,AK031778,AK088385,AK162240,AK168179,BC055325,NM_133692	mRNA									3007	1386	36386	39393	11	0.045	0.532	6.486			1		1	2		uc009imj.1,uc009imk.1	NM_133692	Pold3	delta 3,polymerase (DNA directed)	1625.38	0.83	844.869				701.35	666.639	526.485	337.633	241.535	194.253	213.965	146.046	2.43411	0.989839	0.0390613	105.766	235.881	9.544
IVGNm00932	AF149050,AF408398,BC051589,NM_145151	mRNA									4939	1074	1047	4939	1	0.411	0.217	1.37	2		13	1	1			uc009ihl.1,uc009ihm.1	NM_145151	BC051589,Crebzf	HCF-binding transcription factor Zhangfei,Mus musculus cDNA clone IMAGE:5255639.	4086.54	0.983	821.541				121.705	105.548	178.678	154.707	158.396	180.686	220.44							6.593
IVGNm00933	AJ537610,AK148342,BC019545,NM_001037957,NM_010092,Y18280	mRNA									2520	2067	5412	7812	10	0.253	0.736	5.45			1	1		1		uc009fxz.1,uc009fya.1,uc009fyb.1	NM_001037957,NM_010092	Dyrk1b	dual-specificity tyrosine-(Y)-phosphorylation	2460.44	0.987	2331.1																	7.043
IVGNm00934	AK002217,AK085337	mRNA			NM_025330						2434		6467	7363	3	0.122	0	3.348			1		1	1	7	uc009gwb.1		AK085337	RIKEN full-length enriched library, clone:0610005C13 product:unclassifiable, full insert sequence.,Mus musculus adult male kidney cDNA	232.132	0.095	60.1168																	6.107
IVGNm00935	AK002619,AK079366,BC013485,BC083324,BC093498,NM_133770	mRNA						AK135796			2190	1599	22747	24937	14	0.073	0.459	6.437					1			uc009fvm.1,uc009fvn.1,uc009fvp.1	NM_133770	Adck4	aarF domain containing kinase 4	1459.46	0.685	2021				40.8374	40.5911	55.1179	40.4629	39.8039	24.2068	30.298							8.567
IVGNm00936	AF150103,AK003368,AK003421,AK010994,AK131168,AK166190,BC009158,NM_019502	mRNA		AK154772							3817	3039	40083	43900	16	0.087	0.301	5.357			1	1	1	1		uc009iys.1,uc009iyt.1,uc009iyu.1,uc009iyv.1	NM_019502	8030491N06Rik,Fxc1,Tim9b	complete cds.,MFLJ00251 protein (Fragment).,Mus musculus small zinc finger-like protein (Tim9b) mRNA,fractured callus expressed transcript 1	1842.31	0.697	1295.23				2110.85	2317.6	1689.89	1398.04	972.504	648.789	510.621	250.41	4.1735	0.977421	0.035966	156.384	627.99	12.018
IVGNm00937	AK003029,BC101944,BC103521,BC103522,BC103523,M31811,NM_010758	mRNA									2427	1881	13223	15650	12	0.077	0	13.1			1	1	1	1		uc009ggz.1,uc009gha.1,uc009ghb.1	NM_010758	Mag	myelin-associated glycoprotein	2039.33	0.896	3497.25																	5.871
IVGNm00938	AK003184,AK011508,AK158871,AK161239,NM_018742	mRNA		AK167746							2251	555	1448	3699	3	0.493	0.148	2.134			3			1		uc009kii.1	NM_018742	Bet1l	15 kD,golgi SNARE	412.533	0.233	644.962				75.7703	37.5765	26.1395	14.5248	15.0207	11.12	18.5581	22.3545	0.372575	0.964001	0.506625	12.7298	91.6443	9.548
IVGNm00939	AK003339,AK077948,AK151495,AK154811,BC025090,BC038524,BC115797,NM_026549	mRNA									1283	1092	10868	12151	6	0.074	0.657	5.231			2	2	1	2		uc009giw.1	NM_026549	Pdcd2l	programmed cell death 2-like	666.685	0.716	1262.69				6298.16	7356.65	4039.19	2105.04	710.08	361.809	318.867	142.274	2.37124	0.957634	0.0831673	79.4858	677.287	12.791
IVGNm00940	AK003497	ncRNA		AK030713				NM_001025559			420		152	572	1	0.734	0	2.381												152.738	0.364																		6.303
IVGNm00941	AB074008,AJ278263,AK003503,BC079872,NM_001199227,NM_024289	mRNA		AK188989							3994	2694	49208	53202	21	0.073	0	5.563			3		1	1		uc009kpw.1,uc009kpx.1	NM_024289	Osbpl5	oxysterol-binding protein-like protein 5	2005	0.516	2654.01				4311.42	3894.75	2936.54	1911.67	1308.49	896.695	739.324	157.507	2.62512	0.997674	0.0173168	133.245	192.572	11.014
IVGNm00942	AF089734,AK002585,AK003504,BC024671,NM_019503,NM_052991,NM_052992,NM_194321	mRNA									645	285	3420	3976	7	0.137	0.442	14.228			1		1	1		uc009ght.1,uc009ghu.1,uc009ghv.1,uc009ghw.1,uc009ghx.1,uc009ghy.1	NM_019503,NM_052991,NM_052992,NM_194321	Fxyd1	complete cds., mRNA,Mus musculus phospholemman precursor,phospholemman precursor	354.884	0.637	265.4				37.0797	33.1532	41.4969	35.7249	37.9776	26.6767	42.6134
IVGNm00943	AK003625,AK017371,NM_023140	mRNA							AK152634		1651	1014	29296	30947	10	0.053	0	6.057			1	1				uc009kex.1	NM_023140	Glrx3	glutaredoxin 3	1005.69	0.609	941.579				260.25	273.797	241.597	219.645	188.291	117.914	75.0592	671.503	11.1917	0.989702	0.013557	417.667	1711.91	7.932
IVGNm00944	AK003632,NM_001164086,NM_001164087	mRNA		AK133275							10982	1029	95479	106445	8	0.103	0.079	0.73			11		2	2				Homer2		1962.48	0.371	1435.54				43.4496	31.5441	37.8904	28.7757	31.5963	16.6228	19.411	394.536	6.5756	0.768675	0.0927114	114.627	-273.618	5.593
IVGNm00945	AK003696	mRNA					AK008788				992		622	1614	1	0.615	0	1.008			4		1							216.998	0.219	20.451																	6.001
IVGNm00946	AK003756,AK135483,AK158674	mRNA							AK037090		2140	705	51026	52505	4	0.028	0.21	2.705			2	1								687.734	0.465	645.825				2163.68	2213.04	927.626	437.951	223.936	189.351	202.862	89.143	1.48572	0.969691	0.112647	53.3669	270.441	10.113
IVGNm00947	AK002443,AK003803,BC043447,NM_026384	mRNA							AK002443		2260	1164	26800	29060	7	0.077	0.515	3.112			2		1	1		uc009ile.1	NM_026384	Dgat2	diacylglycerol O-acyltransferase 2	1339.81	0.596	1348.2				1075.58	1207.32	921.715	839.402	657.788	418.891	158.673	558.53	9.30883	0.973977	0.0231597	299.711	4093.56	10.892
IVGNm00948	AK003910,AK037147,AK049852	ncRNA			BC028444			AK156602	AK033520		1535		1544	3079	1	0.411	0	0.928			1			1		uc009gwj.1		AK049852	RIKEN full-length enriched library, clone:1110025D03 product:unclassifiable, full insert sequence.,Mus musculus 18-day embryo whole body cDNA	616.021	0.457																		6.395
IVGNm00949	AK003959,AK077844,NM_001161624,NM_009876,U20553	mRNA		EF437331					AK132278		1942	1044	808	2712	3	0.696	0	1.622			3		1	1		uc009kpd.1,uc009kpe.1	NM_009876	Cdkn1c	cyclin-dependent kinase inhibitor 1C (P57)	933.851	0.591	1043.46																	5.323
IVGNm00950	AJ575814,AK003969,AK044094,BC046472,BC046537,BC049165,BC049993,BC058632,BC096475,NM_175130	mRNA									4730	3639	26822	31111	24	0.132	0.872	5.972			1		1	1		uc009gun.1,uc009guo.1,uc009gup.1	NM_175130	Trpm4	complete cds.,Mus musculus Trpm4 mRNA for transient receptor potential cation channel subfamily M member 4 isoform b,Transient receptor potential cation channel subfamily M member 4 (Long transient receptor potential channel 4) (Calcium-activated non- selective cation channel 1).,transient receptor potential cation channel	2746.7	0.627	2996.09				530.663	578.908	464.133	450.303	433.317	402.841	663.542							9.496
IVGNm00951	AK003973,AK153779,AK163709,NR_033446	mRNA		BC061197					U89399		3640	606	3217	6857	4	0.531	0	1.099	1				1	1				Slx1b		826.745	0.227	915.183																	10.916
IVGNm00952	AK003996,BC139475,BC139478,NM_026806	mRNA									1239	882	7674	8913	4	0.135	0.709	3.328			1	1	1	1		uc009gnx.1	NM_026806	Klk5	kallikrein related-peptidase 5	271.877	0.224	204.893																	6.854
IVGNm00953	AK004038	ncRNA	TRUE					AK050668			384			384		1	0						1							14.527	0.038																		12.564
IVGNm00954	AK004085,NM_145151	mRNA							NM_145151		4939	1074		4939		1	0		2		13	1	1	1		uc009ihl.1	NM_145151	Crebzf	HCF-binding transcription factor Zhangfei	4086.54	0.827	816.514																	7.54
IVGNm00955	AK004106,AK162414	mRNA,ncRNA				BC042662	BC042662	AK135796			3801			3802		1	0				4		1	1						593.791	0.156	81.7122	TRUE			983.325	1519.36	1012.89	910.74	555.629	337.537	226.969	367.446	6.1241	0.84689	0.0752027	129.166	-434.973	10.705
IVGNm00956	AK004182,AK004726,AK160857,NM_053247	mRNA							AK141821		2607	957	9740	12347	5	0.211	0	1.918	1		3	1	1	1		uc009jfr.1	NM_053247	Lyve1	lymphatic vessel endothelial hyaluronan receptor	715.423	0.274	417.213																	4.932
IVGNm00957	AK004275,BC002151,BC038876,BC039798,BC050781,NM_133700	mRNA									2563	1428	51133	53696	10	0.048	0.148	3.902			9	6	1	1		uc009jhl.1	NM_133700	Btbd10	K+ channel tetramerization protein	2201.1	0.876	1155.88				877.288	883.612	660.478	426.75	207.524	143.104	116.883	183.73	3.06217	0.989618	0.0318276	132.143	301.389	5.264
IVGNm00958	AK004587,AK143639,AK155861,AK170418,BC049358,BC100306,BC129919,NM_010194,X12616	mRNA									4403	2466	7427	10189	18	0.266	0.118	6.679			4	2	1	1		uc009ias.1,uc009iat.1	NM_010194	Fes	feline sarcoma oncogene	2253.81	0.806	3483.87				654.173	731.735	699.357	568.958	402.056	326.948	315.863	330.804	5.5134	0.92424	0.0544518	150.193	-1633.37	7.848
IVGNm00959	AK004614,AK147508,AK147566,NM_177231,NM_178220	mRNA							AK165514		7132	1257	64198	71306	15	0.099	0	2.109			1		1			uc009ilu.1,uc009ilv.1	NM_177231,NM_178220	Arrb1	beta 1 isoform A, beta 1 isoform B,arrestin	1958.42	0.275	1667.09																	6.93
IVGNm00960	AJ245569,AK005224,AK048609,BC022119,BC060230,NM_021494	mRNA							AK084641		4955	3864	61759	66642	22	0.073	0.648	4.994			5	3	1	1		uc009jek.1,uc009jel.1	NM_021494	Rab6ip1	Rab6 interacting protein 1	4572.39	0.923	3696.88				2877.26	2975.28	2695.62	2701.81	2172.03	1626.84	1044.23	951.224	15.8537	0.987119	0.0140479	502.739	8814.46	5.241
IVGNm00962	AK005366	ncRNA				AK053830,BC028668,BC078445,BC152824,BC156585,NM_001081292	BC078445	BC042662			851			851		1	0				1									136.493	0.16																		10.546
IVGNm00963	AK005578,AK015302,AK017025	ncRNA	TRUE	AK006348							2311		119744	120993	5	0.01	0	4.003			4		1	1		uc009jns.1,uc009jnt.1		AK005578,AK017025	RIKEN full-length enriched library, clone:1700001C18 product:unclassifiable, full insert sequence.,Mus musculus adult male testis cDNA	224.399	0.18		TRUE			87.9631	87.682	82.2093	71.9002	75.9565	60.538	71.6653	177.273	2.95456	0.796821	0.162155	60.7299	-192.888	7.177
IVGNm00964	AK005686	ncRNA						AK005531			893		26069	26962	5	0.033	0	5.599	1		2			2		uc009jhr.1		AK005686	RIKEN full-length enriched library, clone:1700006P19 product:unclassifiable, full insert sequence.,Mus musculus adult male testis cDNA	206.096	0.231	14.3212																	5.393
IVGNm00965	AK005692,NM_027943	mRNA									2139	1812	34757	36896	11	0.058	0.826	5.143			2		1			uc009jld.1		1700007B13Rik,Pdilt	RIKEN full-length enriched library, clone:1700007B13 product:hypothetical Thioredoxin-like structure containing protein, full insert sequence.,Adult male testis cDNA	929.264	0.434	1144.97																	5.857
IVGNm00966	AK005840	ncRNA	TRUE					AK076849			784		2810	3596	3	0.219	0	3.827			1		1							31.989	0.041
IVGNm00967	AK005859	ncRNA	TRUE	AK011666						AK011666,BC031930,NM_029585	270			270		1	0						1							23.707	0.088					55.3126	50.612	60.6533	50.0644	50.4518	36.3382	48.9197							5.802
IVGNm00968	AB067773,AK005883,BC104105,BC104106,BC106806,NM_027019	mRNA									1124	765	2086	3210	6	0.307	0.678	6.494					2	1		uc009kih.1	NM_027019	Odf3	shippo 1	764.272	0.774	1922.41				53.2935	62.2013	52.56	55.6909	66.0279	44.4478	79.0572							7.891
IVGNm00969	AK005898,NR_015573	ncRNA	TRUE								629		4374	5003	2	0.126	0	3.18					1	1		uc009jga.1		1700012D14Rik,AK005898	RIKEN full-length enriched library, clone:1700012D14 product:unclassifiable, full insert sequence.,Mus musculus adult male testis cDNA	500.029	0.795																		6.277
IVGNm00970	AK005910	ncRNA		NM_011121				AK141202	AK139291		973		19421	20394	3	0.048	0	3.083						1						110.202	0.113	-33.3672				64.805	37.2709	30.4248	20.0752	25.3303	19.3333	25.8146	20.0173	0.333621	0.948364	0.67704	10.5091	210.168	7.294
IVGNm00971	AK005994,NM_001195601	mRNA									388	201	3649	4037	3	0.095	0.518	7.874					1	1		uc009hco.1		1700015G11Rik,AK005994	RIKEN full-length enriched library, clone:1700015G11 product:unclassifiable, full insert sequence.,Mus musculus adult male testis cDNA	29.107	0.075	43.2035																	5.046
IVGNm00972	AK006046	ncRNA	TRUE								254			254		1	0													30.535	0.12																		7.945
IVGNm00973	AK006119,AK131801	mRNA						AK034439			1362		135	1362	1	0.712	0	3.003			2		1	1		uc009igb.1		AK006119	RIKEN full-length enriched library, clone:1700019G06 product:hypothetical protein, full insert sequence.,Mus musculus adult male testis cDNA	715.613	0.935	319.922																	6.733
IVGNm00974	AK006131	ncRNA	TRUE								630		124303	124933	3	0.005	0	4.762					1			uc009lrx.1		AK006131	RIKEN full-length enriched library, clone:1700019L22 product:unclassifiable, full insert sequence.,Mus musculus adult male testis cDNA	58.251	0.092																		6.788
IVGNm00975	AK006140,NM_001163703	mRNA		AK157931	AK040871				NM_001163703		5618	912	36965	42583	2	0.132	0	0.356	2		13		1					Dcun1d3		3224.25	0.574	1198.29				38.5305	28.1448	21.4061	8.24574	10.996	5.54848	10.8844	74.8758	1.24793	0.945398	0.185288	38.8724	1014.48	6.316
IVGNm00976	AK006173	mRNA		BC054747							1184	375	8960	10144	2	0.117	0.317	1.689								uc009gdz.1		AK006173	RIKEN full-length enriched library, clone:1700020L13 product:hypothetical protein, full insert sequence.,Mus musculus adult male testis cDNA	250.186	0.211	-420.844																	6.73
IVGNm00977	AK006254	mRNA					AB055618	BC042662			369		195	564	1	0.654	0	2.71					1							85.089	0.231					888.856	1259.37	736.227	840.786	937.211	731.269	1122.48							9.013
IVGNm00978	AK006266	ncRNA		AK148238						AF067806,AK148238,AK149561,BC125578,BC132145,NM_008803	986			986		1	0													87.749	0.089																		5.793
IVGNm00979	AK006276	ncRNA							AK145411		567			567		1	0								3					110.073	0.194	-264.019																	6.439
IVGNm00980	AK006424,AK016760	ncRNA						M64837			1903			1904		1	0				1		1	1						515.654	0.271																		7.719
IVGNm00981	AK006722	ncRNA						BC050948			302			302		1	0				1		1	1						27.853	0.092																		9.838
IVGNm00982	AK006911,AK039202,AK077059,AK133307,AK138347,BC144969,BC172039,GQ225581,NM_001039721,NM_001164658,NM_029714	mRNA									4455	3435	28936	32502	27	0.078	0.359	8.019			2		1	1		uc009gbd.1,uc009gby.1	NM_001039721,NM_029714	1700067C01Rik,A230107C01Rik,Catsperg1	hypothetical protein LOC320225,hypothetical protein LOC76718	1273.28	0.391	2613.55																	6.059
IVGNm00983	AK006929,BC128277,NM_028849	mRNA									658	504	1889	2547	4	0.246	0.761	6.494			1		1			uc009gms.1	NM_028849	Cldnd2	claudin domain containing 2	312.07	0.49	374.203																	4.95
IVGNm00984	AK007003	ncRNA		BC042901						AF297221,AK002834,AK014214,BC011488,BC042901,NM_022024,NM_175021	348			348		1	0						1							125.351	0.36					30.7051	27.9202	34.7353	27.9213	39.2917	27.814	31.6878							6.747
IVGNm00985	AK007016,AK018960,AK018969,NR_027915	mRNA		BC028646	AK042654			AK144911			543	339		543		1	0.608									uc009jwf.1		1700120K04Rik	RIKEN full- length enriched library, RIKEN full-length enriched library, clone:1700086F19 product:hypothetical protein, clone:1700109M05 product:RIKEN cDNA 1700120K04) (Adult male testis cDNA, clone:1700113F03 product:hypothetical protein, clone:1700120K04 product:RIKEN cDNA 1700120K04 (Adult male testis cDNA, full insert sequence) (Adult male testis cDNA, full insert sequence).,Adult male testis…	38.4	0.072	265.07																	8.903
IVGNm00986	AK007160	ncRNA						BC119562			726		28501	29227	3	0.025	0	4.132					1							10.216	0.014																		6.647
IVGNm00987	AK007167	mRNA						BC157095			380			380		1	0													96.131	0.253																		6.939
IVGNm00988	AK007216	ncRNA	TRUE								884		3354	4238	3	0.209	0	3.394			2			1		uc009kea.1		AK007216	RIKEN full-length enriched library, clone:1700120G07 product:unclassifiable, full insert sequence.,Mus musculus adult male testis cDNA	43.975	0.05	-87.4914																	5.032
IVGNm00989	AK007376,AK050412	ncRNA	TRUE								2414		1481	2415	1	0.318	0	1.447			6		4	4		uc009hgv.1		AK007376	RIKEN full-length enriched library, clone:1810008I18 product:unclassifiable, full insert sequence.,Mus musculus 10 day old male pancreas cDNA	82.43	0.101	32.1467																	7.532
IVGNm00990	AK007426	mRNA									250			250		1	0													75.894	0.304																		7.703
IVGNm00991	AK007845	ncRNA	TRUE								453		160	613	1	0.739	0	2.208					1			uc009hgn.1		AK007845	RIKEN full-length enriched library, clone:1810049I09 product:unclassifiable, full insert sequence.,Mus musculus 10 day old male pancreas cDNA			34.1422																	5.472
IVGNm00992	AK007962,AK010006,AK076736,BC089029,NM_001163684,NM_025533	mRNA		AK005453	AK214413						2059	903	14016	16075	8	0.061	0.373	8.811			3	2	1	1		uc009gsx.1,uc009gsy.1	NM_025533	Nosip	nitric oxide synthase interacting protein	824.055	0.836	2440.73				296.322	334.539	325.17	252.072	147.064	71.2107	57.3843	406.985	6.78309	0.939965	0.041912	190.291	-2933.19
IVGNm00993	AK008102	ncRNA	TRUE								611			611		1	0						1							34.839	0.057	-12.3514	TRUE			182.929	157.698	135.971	112.72	90.478	54.4734	50.1393	253.949	4.23249	0.9866	0.0272563	173.689	472.103	8.626
IVGNm00994	AK008219,BC031742,NM_146198	mRNA									2393	2019	56045	58437	17	0.04	0.43	7.104			1		1			uc009jph.1	NM_146198	Slc5a11	sodium/glucose cotransporter KST1	1627.62	0.692	579.87																	6.108
IVGNm00995	AK008271,AK011395,NM_001136270	mRNA							BC021915		1680	390		1680		1	0						1	1				Prr24		234.458	0.14	350.48				934.133	928.145	678.061	476.531	384.238	277.448	270.98	154.469	2.57449	0.988822	0.0388463	110.288	257.704	10.324
IVGNm00996	AK008330	ncRNA				AB232626,AF399756,AK017185,AK142206,BC017550,NM_029494	AK142206			AB232626,AF399756,AK017185	211			211		1	0								1					17.351	0.082																		6.165
IVGNm00997	AK008392,BC119202,BC119204,NM_027363	mRNA									1288	591	1873	3162	6	0.385	0.457	5.124			1					uc009jos.1	NM_027363	2010110P09Rik	calcineurin B homologous protein 2	549.814	0.47	673.681				59.8079	36.7875	28.4682	19.2693	16.8815	9.06151	11.8984	67.0263	1.11711	0.936331	0.227634	33.2047	-3607.88	6.032
IVGNm00998	AB019505,AF110802,AF110803,AF122907,AK003370,AK008452,AK009721,AK009877,BC018332,CT010164,CT010334,NM_010531	mRNA			BC004667						2596	582	1704	3376	6	0.371	0.997	6.885			2	1	1	1		uc009iqd.1,uc009iqe.1,uc009iqf.1	NM_010531	Il18bp	interleukin 18 binding protein	336.137	0.448	63.9796				67.0821	69.7979	95.6004	76.762	94.6294	80.3299	91.658							8.146
IVGNm00999	AF148511,AK008497,AK079238,BC030397,NM_019733	mRNA									2547	591	144785	147198	8	0.008	0.232	7.776			2		1	3		uc009lkk.1,uc009lkm.1	NM_019733	Rbpms	complete cds.,Mus musculus hermes mRNA,RNA binding protein gene with multiple splicing	1255.87	0.875	774.467				447.365	535.397	456.067	413.546	294.086	188.354	173.191	417.073	6.95122	0.934601	0.0432406	189.237	-2044.76	9.314
IVGNm01000	AK008599,AK083848,AK147327,BC023872,BC026849,NM_144925	mRNA									8479	5688	62933	71412	23	0.011	0.963	9.346	1		5	1	1	1	1	uc009jpb.1,uc009jpc.1	NM_144925	Tnrc6a	RIKEN full-length enriched library, clone:2010321I05 product:unclassifiable, full insert sequence.,Mus musculus adult male small intestine cDNA,trinucleotide repeat containing 6A	7983.26	1.009	2330.01				1641.96	2089.64	758.392	639.014	726.154	561.383	516.936	75.8946	1.26491	0.817382	0.358997	26.9232	-92.6761	11.739
IVGNm01001	AK008654,BC107186,BC107187,BC119485,BC119486,NM_029806	mRNA									1351	771	3675	5026	4	0.203	0.568	4.278								uc009fpj.1	NM_029806	Lypd5	Ly6/Plaur domain containing 5	449.899	0.371	654.34																	6.076
IVGNm01002	AK008705	ncRNA							AK040457		627		586	1213	2	0.517	0	3.19					1	2		uc009mlp.1		AK008705	RIKEN full-length enriched library, clone:2210011C24 product:hypothetical protein, full insert sequence.,Mus musculus adult male stomach cDNA	173.624	0.277		TRUE			36.6294	30.8632	36.4802	21.5821	18.7052	11.6676	11.6521	283.494	4.72489	0.897515	0.072251	119.748	-771.593	7.425
IVGNm01003	AK008788,AK011302,AK018688,NM_028177	mRNA									2002	471	13005	15011	4	0.053	0.234	5.533			2					uc009joh.1	NM_028177	Ndufab1	alpha/beta,NADH dehydrogenase (ubiquinone) 1	521.383	0.554	489.59				204.749	221.673	202.938	183.954	139.94	70.9877	35.2483	684.161	11.4027	0.978881	0.0194784	362.056	6200.37	6.482
IVGNm01004	AK008836	ncRNA						AJ278576	AK040569		1094			1094		1	0						1							30.526	0.028	-14.3297																	7.594
IVGNm01005	AK008890,NM_023750	mRNA									5711	1677	7157	12868	4	0.444	0	0.7	1		11			1		uc009gbz.1	NM_023750	Zfp84	zinc finger protein 84	428.857	0.12	769.516				518.044	335.437	121.297	51.6823	53.7834	41.611	39.4679	44.187	0.73645	0.999191	0.0396598	39.5589	50.0415	5.534
IVGNm01006	AK008906,BC018511,NM_133722	mRNA		AK132723					BC018511		2235	960	40300	42535	2	0.053	0	0.895	1		6		1			uc009ied.1	NM_133722	2210412D01Rik	hypothetical protein LOC70178	1386.15	0.62	947.544				1359.05	1150.18	770.911	475.798	283.186	194.998	181.546	119.816	1.99694	0.999401	0.0114756	109.743	131.926	6.228
IVGNm01007	AK008908	ncRNA		AK211480	NM_001164518				BC112410		956			956		1	0		1		1		1							59.178	0.062	-16.5305				57.2115	50.5108	51.5	32.9836	31.4382	15.8574	24.7034	215.984	3.59974	0.907084	0.086009	96.4147	-899.326	6.012
IVGNm01008	AK008910,AK049406,AK152192,NM_009982,U74683	mRNA							NM_009982		2443	1389	30311	32754	6	0.061	0	3.06			4	1	1	1		uc009ifu.1	NM_009982	Ctsc	cathepsin C preproprotein	1015.91	0.498	1214.23																	15.798
IVGNm01009	AF245448,AK004951,AK009037,AK016616,AK146414,AK151990,AK154321,AK198375,AK202851,BC006941,BC053737,BC092084,NM_001172561,NM_020011,NM_203280	mRNA		AK145649,AK178971,BC072558	AK140243,BC084676			AK191941	AF478566		3481	1854	5059	8540	6	0.339	0.771	2.266			3	1	1			uc009gwt.1,uc009gwu.1,uc009gwv.1	NM_020011,NM_203280	Sphk2	sphingosine kinase 2	1998.93	0.633	3598.46				2235.92	2157.72	858.078	339.26	194.605	149.523	133.153	81.9318	1.36553	0.978296	0.103984	52.2269	189.994	12.663
IVGNm01010	AK009069	ncRNA				AK052433,DQ867033,FN429927,NM_001199224,NM_172902	FN429927				951			951		1	0				3		1							108.724	0.114	-72.7853																	8.26
IVGNm01011	AK009091,AK086402	ncRNA	TRUE								1993		7917	8910	2	0.111	0	2.014			3		1	1	2					73.745	0.074	-24.925																	4.636
IVGNm01012	AK009284,AK009902	mRNA									2341	975	9850	12191	6	0.123	0.247	4.075			3					uc009iqv.1	NM_009710	Art1	ADP-ribosyltransferase 1	1201.71	0.513	1500.6				54.1084	47.0941	43.0121	24.3076	26.3048	21.4779	26.857	104.576	1.74293	0.919499	0.159306	49.5108	-932.176	11.183
IVGNm01013	AK009294	ncRNA							BC107187		216			216		1	0						1							19.687	0.091																		5.56
IVGNm01014	AK009387	mRNA									881	521	390	1271	1	0.693	0.591	1.135					1	1						59.44	0.067	-110.323																	6.073
IVGNm01015	AK009391,AK077451,BC058431,BC116934,BC116936,NM_025518	mRNA		BC120582							1860	1482	40497	42313	15	0.037	0.628	9.579					1			uc009nfa.1,uc009nfb.1	NM_025518	Dus2l	RIKEN full-length enriched library, clone:2310016K04 product:hypothetical FMN-linked oxidoreductases structure containing protein, full insert sequence.,Mus musculus adult male tongue cDNA,dihydrouridine synthase 2-like	1400.48	0.868	1612.73				343.175	362.34	296.87	190.969	99.9268	63.7887	61.8544	213.749	3.56249	0.975448	0.0430277	132.435	553.748	10.208
IVGNm01016	AK009476,AK088692,AK153920,BC048724,BC085484,BC089002,BC118934,BC118935,NM_027999	mRNA			AK131900						3853	1857	20116	23969	24	0.125	0.243	9.399			2	2	1			uc009gfo.1,uc009gfs.1	NM_133693	3100004P22Rik,Haus5,Kiaa0841	Protein KIAA0841.,hypothetical protein LOC68035	2681.19	0.825	2756.14				630.293	698.2	755.533	556.323	569.012	339.254	270.843	1428.57	23.8095	0.829652	2.85782	3266.29	914.208	9.959
IVGNm01017	AK009564,AK153883,BC048183,BC058537,NM_175115	mRNA		BC054428	BC110381				BC048183		4390	1260	17440	21830	3	0.189	0.309	0.737			16		1	1	3	uc009kbj.1	NM_175115	Ikzf5	IKAROS family zinc finger 5	2420.75	0.551	2229.1				52.4771	44.7414	33.4666	19.191	19.3706	12.5224	17.547	97.5668	1.62611	0.975343	0.0920379	60.9987	243.606	6.407
IVGNm01018	AK009626	ncRNA		NM_030705						AK036338,AK084510,AK089082,AK162446,AY007813,BC018326,NM_030705	283			283		1	0						1	1						7.612	0.027																		6.693
IVGNm01019	AK009725,AK083802,AK145004,AK154182,BC066115,BC085472	mRNA							NM_001045486		3888	1965	22085	25777	4	0.143	0	1.039			3	1	1							1208.26	0.311	1174.65				3763.88	3633.89	2246.24	1737.56	1384.59	1294.98	1115.16	100.103	1.66838	0.984362	0.0710222	67.8834	190.536	6.567
IVGNm01020	AK007753,AK008089,AK010168,AK160267,BC035323,BC046908,BC147300,BC147301,NM_027215	mRNA		AK049951							868	675	1033	1834	6	0.437	0.419	7.742						1		uc009gga.1,uc009ggb.1	NM_027215	Tmem147	RIKEN full-length enriched library, clone:1810042M06 product:SEVEN TRANSMEMBRANE DOMAIN PROTEIN homolog [Homo sapiens], full insert sequence.,Mus musculus 10 day old male pancreas cDNA,transmembrane protein 147	745.88	0.894	1356.96				3795.14	4504.93	4021.05	3917.8	3086.32	2120.74	1422.96	923.351	15.3892	0.940205	0.0311641	316.105	-1002.52	12.972
IVGNm01021	AK010278,AY205605,AY363100,BC040821,BC041796,BC054465,EF602040,NM_028021	mRNA						BC156432			6498	6099	58584	65024	41	0.089	0.493	6.366			1		1	1		uc009gqi.1,uc009gqj.1	NM_028021	Myh14	heavy polypeptide 14,myosin	5332.81	0.824	9473.82
IVGNm01022	AK010280,AK010589,AK131968,AY606111,BC138841,BC138842,D31647,NM_009482	mRNA						AK198428			1224	1020	97	1321	1	0.92	0.657	0.898					1	1		uc009kgf.1	NM_009482	Utf1	undifferentiated embryonic cell transcription	428.224	0.381	1152.22				51.1611	40.554	39.2113	24.5901	26.8383	17.8168	21.4384	131.181	2.18635	0.913193	0.131986	60.8482	-841.566	6.576
IVGNm01023	AK010602,AK019119,BC011191,NM_133686	mRNA									1209	900	13063	14273	3	0.084	0.33	2.506						1		uc009jug.1	NM_133686	Qprt	quinolinate phosphoribosyltransferase	562.477	0.47	1412.65				26.3167	23.0251	28.3292	19.1713	24.209	12.1354	16.4385							6.658
IVGNm01024	AK010671	mRNA									1342	621	18515	19873	9	0.068	0.463	6.706			1		1	1						1028.71	0.767	372.438				57.1652	60.2738	72.4744	67.1041	70.5871	74.2463	86.94							12.58
IVGNm01025	AK010751,AK035668,AK122565,AK146784,AY151083,BC058355,BC156720,NM_172279	mRNA			BC051595						3561	2256	30161	33688	17	0.07	0.999	7.204	1	1	1		1			uc009flw.1,uc009flx.1,uc009fly.1	NM_172279	Mark4,mKIAA1860	RIKEN full-length enriched library, clone:2410090P21 product:SIMILAR TO MAP/MICROTUBULE AFFINITY-REGULATING KINASE LIKE 1 homolog [Homo sapiens], full insert sequence.,MAP/microtubule affinity-regulating kinase 4,Mus musculus ES cells cDNA	2653.26	0.931	2152.75
IVGNm01026	AB516303,AK010782,AK169883,BC058404,EU568871,NM_029741	mRNA		U88401	AF158597						4843	3582	23481	27805	29	0.151	0.175	6.47			2	1	1			uc009gus.1,uc009gut.1	NM_029741	Ppfia3	RIKEN full-length enriched library, clone:2410127E16 product:Liprin-alpha3 (Fragment) homolog [Homo sapiens], f, full insert sequence., receptor type,Mus musculus ES cells cDNA,protein tyrosine phosphatase	4373.11	0.933	5244				38.9587	32.6233	44.0465	28.6264	28.5642	16.7557	19.7483	403.803	6.73005	0.740956	0.0985214	110.452	-243.856	6.387
IVGNm01027	AK010844,BC030492,BC038522	mRNA			AK032249				BC017150		2423	624	11735	14158	8	0.171	0	3.302	1	1	6	4	1	1						2328.27	0.961	465.334				431.2	267.433	79.6309	38.5911	37.2736	34.8228	30.0916	38.8548	0.64758	0.999809	0.0220663	36.7512	41.2138	6.44
IVGNm01028	AK010974	ncRNA	TRUE	AK140426						AK140426,AK163589	1658			1658		1	0				3		1							193.612	0.117	-28.94																	15.816
IVGNm01029	AK011106,AK020571	ncRNA		AK006287					BC005413	AK006287,AK139102,AK169898,BC026784,NM_029339	1030			1030		1	0				3		1	1						135.807	0.148					73.1477	58.4625	56.8127	42.0343	39.999	24.6068	43.9205	123.486	2.05809	0.821155	0.212149	44.9216	-164.886	6.103
IVGNm01030	AK011173,NR_030674	mRNA		AK049208							713	309		713		1	0.433						1					Gm4532		105.767	0.148	-193.587																	6.695
IVGNm01031	AK011370	ncRNA		AK089938					AK132537	AK089938,AK144836,AK157832,BC004088,BC015287,NM_030566	550			550		1	0													71.201	0.129					43.0618	42.1006	39.6405	27.9704	22.6796	14.7818	29.3074	154.768	2.57947	0.798446	0.183234	53.4935	-173.272	6.923
IVGNm01032	AK011807	ncRNA			AK084269			NM_001168475	NM_183312		909		62695	63604	7	0.014	0	7.701												405.659	0.446																		5.522
IVGNm01033	AK011112,AK011816,AK051677,AK054462,AK166282,BC026424,BC055022,BC089575,NM_028243	mRNA									2542	1473	56638	59180	9	0.027	0.397	5.145			3	1	1	1		uc009iij.1,uc009iik.1	NM_028243	Prcp	RIKEN full-length enriched library, clone:2610104A14 product:hypothetical protein, full insert sequence.,10 days embryo whole body cDNA,angiotensinase C like	1481.35	0.63	850.969																	6.286
IVGNm01034	AK012000	ncRNA				AB041583,AF130471,AK007414,AK016510,AK036675,AK171734,BC145765,NM_013863	AB041583			AJ250687,AK214932	612			612		1	0													25.671	0.042	-31.0561																	5.882
IVGNm01035	AK012016,NM_173863	mRNA							NM_173863		5110	1857	97136	102246	14	0.05	0	2.74			1		1	1		uc009iaz.1	NM_173863	Crtc3	transducer of regulated CREB protein 3	1733.3	0.339	1109.83				404.287	352.145	203.649	124.342	82.9334	61.1321	57.5441	97.5193	1.62532	0.997804	0.0271703	82.8621	118.476	6.946
IVGNm01036	AK012020	ncRNA		AK003415						AB025407,AK003415,AK144059,AK167571,AK168206,AK169309,AK170172,AK180958,BC072575,NM_019772	1203			1203		1	0						3	3						36.142	0.03	-5.5385																	8.203
IVGNm01037	AK012507,AK012542	ncRNA		NM_010320					AK183974	AK144609,NM_010320	1662			1662		1	0				5		2	5						272.093	0.164	29.9304																	6.466
IVGNm01038	AK012570,AK032355,BC100339,NM_018791	mRNA									2631	1926	5020	7651	3	0.338	0.732	1.171			1	1	1	1		uc009fpc.2	NM_018791	Zfp108	zinc finger protein 108	252.018	0.098	934.056				38.3768	25.6516	17.0778	7.52216	11.396	7.40683	13.1264	44.3854	0.739756	0.948126	0.324535	22.6266	1157.16	6.841
IVGNm01039	AK012322,AK012573	mRNA						AK051651			1093	326		1094		1	0.313				1			1	6					987.748	0.904	-132.658																	6.943
IVGNm01040	AK012685,AK041070,AK050422,BC031851,EU486166,EU486167,NM_001199306,NM_175250	mRNA									2146	849	33850	35902	6	0.057	0.4	2.976			4	2	1	1		uc009fgb.1,uc009fgc.1	NM_175250	2810007J24Rik	hypothetical protein LOC76971	194.457	0.096	-36.8195																	10.263
IVGNm01041	AK012947,BC050048,NM_178384	mRNA									3711	2040	15392	19103	4	0.194	0.549	1.078			5	1	1	1		uc009gcr.1	NM_178384	Zfp74	zinc finger protein 74	867.063	0.234	1057.76				62.7166	30.1961	17.1574	11.1552	12.9596	7.50746	14.9809	20.884	0.348067	0.978393	0.4145	13.2353	49.4762	8.801
IVGNm01042	AK012966,AK014405,AK033674,NM_026143,NM_027379	mRNA							AK005531		3972	1545	52716	56597	12	0.06	0	3.572	1	1	8	1	1	2		uc009jho.1,uc009jhp.1,uc009jhq.1	NM_026143,NM_027379	Mlstd2	Fatty acyl-CoA reductase 1 (EC 1.2.1.-) (Male sterility domain- containing protein 2).,male sterility domain containing 2	2883.68	0.819	1039.72				44.7772	23.8761	35.1872	17.9331	16.8255	10.0789	12.597	168.997	2.81662	0.746759	0.195486	52.721	-140.188	6.292
IVGNm01043	AK012967,AK143086,AK180977,BC011221,BC022600,BC022930,NM_001122780,NM_029652	mRNA		AK183825	AK193010						3385	1778	22419	25793	2	0.129	0.622	0.661					1	1		uc009hwy.1,uc009hxa.1	NM_182782	Klhl25	kelch-like 25	1688.01	0.5	3574.68				68.2668	52.0292	24.6739	17.4732	25.2403	17.254	28.7299	37.8787	0.631312	0.946789	0.388259	19.1132	2082.79	7.063
IVGNm01044	AK012985	ncRNA						AF358728			1244		217691	218936	5	0.006	0	4.019			2		1							123.48	0.099	-19.8374																	5.919
IVGNm01045	AK013067	ncRNA	TRUE	AK156835						AJ002198,AK090112,AK156835,BC089018,NM_008672	571			571		1	0						1	1						162.818	0.285	-59.0984				35.8496	25.989	31.4899	22.7222	30.1982	15.6507	27.4187							6.739
IVGNm01046	AK013081,BC053039,NM_001048167	mRNA		BC050000							4962	1707	47944	52906	2	0.094	0	0.403			2		1	1		uc009ilg.1	NM_001048167	Mtap6	microtubule-associated protein 6 isoform 2	1744.54	0.458	1653.48				227.528	228.396	211.671	165.467	112.375	52.5022	44.3443	361.431	6.02385	0.984863	0.0221696	235.471	777.15	9.079
IVGNm01047	AK013113	ncRNA						NM_026545	NM_182694		315		1808	2123	2	0.148	0	6.349												315.143	1																		6.283
IVGNm01048	AK003611,AK012276,AK013143,BC031521,NM_025948	mRNA		AK044863							2723	1389	42098	44821	10	0.061	0.457	4.587	1		2	1	1	1		uc009gjc.1,uc009gjd.1	NM_025948	Lsm14a	RIKEN full-length enriched library, clone:1110011H05 product:hypothetical Glycine-rich region containing protein, full insert sequence.,LSM14 homolog A,Mus musculus 18-day embryo whole body cDNA	2477.97	0.958	1016.36				999.278	1052.05	876.561	732.33	493.314	375.664	255.201	318.075	5.30125	0.986898	0.022551	215.081	610.343	7.945
IVGNm01049	AK013458	ncRNA	TRUE					AK016032			411			411		1	0				1									16.335	0.04																		5.107
IVGNm01050	AB175685,AK013527,BC024988,NM_173739	mRNA									2575	1869	305787	308317	10	0.008	0	3.953	2	1	1	1	1			uc009jgc.1,uc009jgd.1	NM_173739	Galntl4	UDP-N-acetyl-alpha-D-galactosamine:polypeptide	2234.84	0.879	2329.6																	8.52
IVGNm01051	AK013616,AK032244	ncRNA							M36515		2433			2433		1	0				4		2	3						66.537	0.04	34.4095																	5.496
IVGNm01052	AK004043,AK013646,AK152526,BC023442,BC046763,NM_026827,NM_028389	mRNA									1097	816	11119	12060	5	0.075	0.347	5.537					1	1		uc009jti.1,uc009jtj.1,uc009jtk.1,uc009jtl.1	NM_026827,NM_028389	1110032O16Rik	RIKEN full-length enriched library, clone:1110032O16 product:hypothetical protein, full insert sequence.,Mus musculus 18-day embryo whole body cDNA,hypothetical protein LOC68742	700.045	0.742	830.251				312.115	334.679	339.919	254.745	148.269	65.7915	51.7147	406.068	6.76781	0.944352	0.0403123	194.029	-4374.75	7.177
IVGNm01053	AK013772,AK045409,BC038375,NM_080853	mRNA							AF324864		4076	1746	44977	49053	11	0.076	0	2.988			11	2	1	1		uc009hcf.1	NM_080853	Slc17a6	solute carrier family 17 (sodium-dependent	3414.32	0.868	1866.27																	9.554
IVGNm01054	AK013794	ncRNA	TRUE								720		1987	2707	3	0.266	0	4.167			3		1	1		uc009icc.1		AK013794	RIKEN full-length enriched library, clone:2900076A07 product:unclassifiable, full insert sequence.,Mus musculus adult male hippocampus cDNA	86.318	0.12		TRUE	linc1572		604.787	576.13	488.588	448.783	394.748	326.706	322.425	208.552	3.47586	0.990248	0.0275065	150.8	337.992	7.117
IVGNm01055	AK013840,AK082775,BC003932,BC054744,NM_030240	mRNA									4366	2177	890	5263	2	0.553	0.499	1.817			1		1	1		uc009jtx.1	NM_030240	2900092E17Rik	hypothetical protein LOC67278	2435.46	0.558	1658.23				3743.9	4217.61	1962.53	934.255	522.259	498.002	500.604	100.951	1.68251	0.948107	0.13067	53.6789	845.759	11.347
IVGNm01056	AK013926	ncRNA	TRUE								664		82602	83267	3	0.008	0	4.518	1				1	1						95.648	0.144																		10.276
IVGNm01057	AK014034	ncRNA							AK036338		949			950		1	0				1		1	1						2.401	0.003					2461.22	2235.45	925.124	515.42	262.451	198.688	185.568	81.1294	1.35216	0.988035	0.0776557	57.1094	140.022	6.65
IVGNm01058	AK014059	ncRNA	TRUE								734			734		1	0		1											20.905	0.028																		6.094
IVGNm01059	AK014156,AK076241	mRNA,ncRNA				AK019097,AK088850,AK148008,BC044749,BC052432,NM_026655	AK148008			AK163875	2966			2966		1	0		3		6		1	2						222.441	0.075	14.1151																	6.865
IVGNm01060	AK014157,AK019505,AK051992,AK084084,AK145781	mRNA		AK142206							3811	272		3811		1	0				9				1					297.821	0.078	-34.1155	TRUE			43.2159	23.0937	28.4651	16.8399	16.1719	8.85755	13.6297	112.357	1.87262	0.780302	0.265359	37.5723	-113.443	11.964
IVGNm01061	AF217090,AK006415,AK014205,BC061094,NM_023331	mRNA		NM_026498							1103	852	6720	7831	3	0.106	0.587	3.058			1	1	1	1		uc009hxl.1	NM_023331	Mrpl46	mitochondrial ribosomal protein L46	527.578	0.573	1493.8				2917.13	2811.38	1910.57	996.614	399.073	214.635	187.087	147.925	2.46542	0.992549	0.0329942	111.572	219.419	11.142
IVGNm01062	AK014218,AK044679,AK138426,NM_144925	mRNA							BC005741		8479	5688	62933	71412	23	0.119	0	2.867	1		5	1	1	1		uc009jpc.1,uc009jpe.1,uc009jpf.1	NM_144925	Tnrc6a	trinucleotide repeat containing 6A	7983.26	0.947	1178.01				1477.94	995.184	407.822	322.082	285.263	224.22	173.217	42.8488	0.714146	0.993081	0.120281	31.8798	65.3253	8.907
IVGNm01063	AK014683	ncRNA	TRUE								896		17876	18772	2	0.048	0	2.232			1		1	1		uc009hiz.1		AK014683	RIKEN full-length enriched library, clone:4833412C05 product:unclassifiable, full insert sequence.,Mus musculus 0 day neonate head cDNA	40.573	0.045	-18.5979																	4.955
IVGNm01064	AK014710	mRNA				AK135576,AY033771,NM_029332	NM_029332			AK037815,AK133803	2061			2061		1	0				2				3					322.451	0.156																		5.899
IVGNm01065	AK014760,AK158574,AK173268,AY660739,BC046808,BC056498,NM_029426	mRNA									4145	2022	50447	54493	19	0.074	0	4.584	1		5		1	1		uc009kmg.1,uc009kmh.1,uc009kmi.1	NM_001009930,NM_029426	Brsk2,mKIAA4256	RIKEN full-length enriched library, clone:K230015H09 product:Non receptor serine/threonine kinase (Fragment) homolog [Dugesia japonica], full insert sequence.,Mus musculus visual cortex cDNA,brain-selective kinase 2 isoform alpha,brain-selective kinase 2 isoform gamma	2707.27	0.653	1868.57				64.5584	58.2177	63.7219	47.6832	42.1792	27.721	31.3287	316.798	5.27997	0.918636	0.0584222	141.707	-1344.73	7.017
IVGNm01066	AK014796	ncRNA				AK089490,AK090059	AK090059		AK089490		1641			1646		1	0		1											132.272	0.081	16.8809																	6.974
IVGNm01067	AK014833	ncRNA	TRUE								1727			1732		1	0				2									131.347	0.076	-50.8981																	5.756
IVGNm01068	AK014876,AK029544,BC127049,BC152307,BC152308,NM_001162979	mRNA									2691	1962	34791	37482	15	0.059	0.523	6.375			5	3	1	1		uc009igf.1,uc009igg.1		Ccdc81	RIKEN full-length enriched library, clone:4921513D09 product:hypothetical protein, full insert sequence.,Adult male testis cDNA,Mus musculus adult male testis cDNA	909.247	0.37	720.62																	6.196
IVGNm01069	AK014883	ncRNA						NM_008746			1096		260	1356	1	0.808	0	0.912			5		1							26.72	0.024	-2.7306																	6.464
IVGNm01070	AK014928	ncRNA		L10427				BC152918		AB221612,BC146323,BC148751,L10427,NM_007959	1784			1784		1	0		1		6									298.496	0.167																		14.118
IVGNm01071	AK014930	ncRNA		AB041583						AB041583,AF130471,AK007414,AK016510,AK036675,AK171734,BC145765,NM_013863	586			586		1	0						2							27.018	0.046																		7.736
IVGNm01073	AK015048	ncRNA	TRUE								1000		2596	3596	2	0.278	0	2			7		1							54.379	0.054																		4.627
IVGNm01074	AK015097	ncRNA						BC039209			1060			1060		1	0				2			1						116.996	0.11	-24.1547																	5.775
IVGNm01075	AK015130,AK161332	ncRNA		NM_011247						AK045635,AK081261,BC025874,NM_011247,NM_175023	993			993		1	0				3		2	5						278.127	0.28	32.7885																	6.411
IVGNm01076	AK015215	ncRNA							NM_001081007		834			834		1	0						1	1						66.764	0.08	-8.8078				53.0699	35.049	32.7977	15.1518	18.7877	12.4484	16.0834	76.8932	1.28155	0.906704	0.240126	34.4403	-330.507	11.226
IVGNm01077	AK015274	mRNA				AK080614,BC111102,GU220061,NM_175032	GU220061				882		198835	199717	5	0.004	0	5.669					1	1						372.165	0.422																		11.916
IVGNm01078	AK015472	ncRNA		AK084800					AK153135	AK084800,AK155062,BC054483,NM_183020	1727			1727		1	0				3		1	1	4					260.561	0.151	-65.061																	7.357
IVGNm01079	AK015477	ncRNA		AK051007		AK009135,AK015083,AK157931,NM_029610	AK015083			AK029043,AK155160,BC030335,NM_001163703,NM_173408	1676			1680		1	0				4				1					190.525	0.114	-46.2553																	5.892
IVGNm01080	AK015483,AK016243	ncRNA		AK017036							754		3418	4172	1	0.178	0	1.351			1		1	1		uc009jad.1		AK016243	RIKEN full-length enriched library, clone:4930458B22 product:unclassifiable, full insert sequence.,Mus musculus adult male testis cDNA	41.084	0.056	-27.39				40.0571	36.121	42.5085	31.2884	26.0443	14.5281	16.5879	396.98	6.61633	0.890738	0.0589661	154.905	-705.457	7.488
IVGNm01081	AK015592,AK131801	ncRNA						AK034439			1362			1362		1	0				2		1	1						715.613	0.54	-280.109																	5.285
IVGNm01082	AK015636	ncRNA	TRUE								632			632		1	0						1	1						39.078	0.062																		12.439
IVGNm01083	AK015704	ncRNA	TRUE								546		9340	9886	2	0.055	0	3.663												56.208	0.103																		6.946
IVGNm01084	AK015707,AK019701	ncRNA						AK122270			1169		1261	2430	1	0.481	0	0.855					1			uc009gkn.1		AK019701	RIKEN full-length enriched library, clone:4930505M18 product:unclassifiable, full insert sequence.,Mus musculus adult male testis cDNA	198.044	0.169	-3.0374																	6.151
IVGNm01085	AK015712	ncRNA						AK019476			971		52498	53469	3	0.018	0	3.09			1					uc009nga.1		AK015712	RIKEN full-length enriched library, clone:4930506A18 product:unclassifiable, full insert sequence.,Mus musculus adult male testis cDNA	164.179	0.169	-59.2276																	5.96
IVGNm01086	AK015741	ncRNA						BC026599	BC023784		644		6608	7252	3	0.089	0	4.658			1					uc009lwi.1		AK015741	RIKEN full-length enriched library, clone:1700125H03 product:unclassifiable, full insert sequence.,Mus musculus adult male testis cDNA	6.38	0.01																		5.096
IVGNm01087	AK015783	ncRNA	TRUE								1317			1318		1	0				2		1							136.911	0.104	-4.5822																	6.796
IVGNm01088	AK015786	ncRNA						AY177410			1263			1263		1	0				3		1	1						86.738	0.069	-59.5019																	5.363
IVGNm01089	AK006215,AK015826,AK016879,GU220061	mRNA		NM_173411							1806	1803	1132487	1134293	11	0.002	0.998	6.091			1		1	1		uc009ltb.1		AK015826	RIKEN full-length enriched library, clone:1700021K10 product:unclassifiable, full insert sequence.,Mus musculus adult male testis cDNA	1786.02	0.989	1731.39																	5.727
IVGNm01090	AK015830	ncRNA	TRUE								571		18774	19345	2	0.03	0	3.503					1	1						14.855	0.026																		5.349
IVGNm01091	AK015957	mRNA						AK050668			1159	455		1160		1	0.393							1						14.02	0.012	-383.478																	6.209
IVGNm01092	AK016032	ncRNA	TRUE								1117		11636	12753	4	0.088	0	3.581	1							uc009kfa.1		AK016032	RIKEN full-length enriched library, clone:4930543N07 product:unclassifiable, full insert sequence.,Mus musculus adult male testis cDNA	49.609	0.044	-13.5849																	6.456
IVGNm01094	AK016181,BC025039	ncRNA	TRUE	AK032985,AK137691						AK032985,AK137691,BC039956,BC066050,BC089304,NM_172280	1624			1632		1	0				1									425.209	0.262	33.9077				44.651	32.0119	39.8442	19.9347	28.9569	23.8072	28.6233							6.381
IVGNm01095	AK016186	mRNA		AK177436				AK167135	BC071183	AK078811,AK080630,AK087074,AK142240,AK150434,AK158048,AK158249,AK158250,AK167192,AK171378,BC006689,NM_145586	1589			1595		1	0				2		1	1						28.735	0.018	106.552																	11.101
IVGNm01096	AK016228,AK053947	mRNA		AK077664							2066	502		2066		1	0				3		3	3						290.42	0.2	32.2615																	6.159
IVGNm01097	AK016242	ncRNA						NM_011807			1280		26025	27306	6	0.047	0	4.688			3		1							89.516	0.07																		5.721
IVGNm01098	AK016262	ncRNA	TRUE					M64837			1246			1247		1	0						2	2						60.215	0.048	-28.322																	7.562
IVGNm01099	AK016274,NM_001145759	mRNA						AK050668	NM_001145759		2153	459		2153		1	0						1					4930571K23Rik		195.603	0.091	-69.0102																	6.266
IVGNm01100	AK016366	ncRNA		BC172089							1474		4133	5607	3	0.263	0	2.035			1		1	1						129.013	0.088	-12.6458																	5.399
IVGNm01101	AK015992,AK016431,AK030125,BC132158,BC145054,NM_028737	mRNA									3970	1104	9925	13895	8	0.158	0.277	4.141			3	1	1	1		uc009gmw.1	NM_028737	4931406B18Rik	hypothetical protein LOC74054	408.388	0.116	80.4286																	5.409
IVGNm01102	AK016451	ncRNA						NM_011807			1448			1448		1	0				3		2	1						91.14	0.063																		6.052
IVGNm01103	AK016494	ncRNA						AK132915	NM_009943		1135		97	1232	1	0.921	0	0.881	1				2	3						151.361	0.133	23.4045																	5.728
IVGNm01104	AK016552	ncRNA						AK139798	AJ250693		2599			2599		1	0				1		2	2						169.829	0.065	47.9895																	6.755
IVGNm01105	AK016571,AK142950	mRNA									3579	2904	63427	67006	21	0.053	0.264	5.868			2					uc009jeh.1,uc009jej.1	NM_020052	Scube2	RIKEN full-length enriched library, clone:4932442O19 product:CUB domain and EGF-like repeat containing 1, full insert sequence.,Cegp1 protein,Mus musculus adult male testis cDNA	2873.89	0.803	2300.05																	6.317
IVGNm01106	AK016594	ncRNA	TRUE								868		75716	76584	4	0.011	0	4.608			2		1	2		uc009mzw.1		AK016594	RIKEN full-length enriched library, clone:4933400L20 product:unclassifiable, full insert sequence.,Mus musculus adult male testis cDNA	222.808	0.257	17.3185																	5.808
IVGNm01107	AK016610	ncRNA	TRUE								1000		15524	16524	3	0.061	0	3			1									24.534	0.025	40.3412																	9.159
IVGNm01108	AK016650	ncRNA	TRUE								1202		5847	7049	1	0.171	0	0.832	1				1	1		uc009glf.1		AK016650	RIKEN full-length enriched library, clone:4933404I11 product:unclassifiable, full insert sequence.,Mus musculus adult male testis cDNA	193.093	0.161	-46.0897																	8.062
IVGNm01109	AK016694,NM_001143765	mRNA									1462	987	9164	10626	12	0.137	0.675	8.247			2	1	1	1		uc009kid.1		Syce1	Synaptonemal complex central element protein 1.	569.216	0.389	363.341																	9.276
IVGNm01110	AK016697	ncRNA						NM_001159672			963		11314	12277	3	0.078	0	3.115												19.081	0.02																		6.39
IVGNm01111	AK016760	ncRNA						M64837			1903			1904		1	0				1		1							515.654	0.271	-76.7896																	5.397
IVGNm01112	AK016847,AK029511,AK029888,AK133339,BC030885,BC100433	mRNA		AK131858	BC115973						2739	1581	52592	55313	12	0.035	0.349	5.639			4	3	1	4		uc009ihx.1,uc009ihy.1,uc009ihz.1		Ankrd42	Ankyrin repeat domain-containing protein 42.	1521.65	0.684	940.174				188.74	172.015	158.892	109.521	67.8891	40.4389	35.1734	246.349	4.10581	0.988939	0.0253729	173.817	422.76	8.246
IVGNm01113	AK016851	mRNA						NM_008434			1523		6353	7876	2	0.193	0	1.313			1		2	2						42.891	0.028	56.5827																	6.399
IVGNm01114	AK016874	ncRNA				NM_011247	NM_011247			U83913	1957			1959		1	0		1		3		2	2						1129.78	0.577	-44.5102																	12.127
IVGNm01116	AK016962	ncRNA		AK147559				NM_001170912		AK147559,NM_001170913,NM_181853	1017			1017		1	0						1							125.987	0.124	13.1884																	6.239
IVGNm01117	AK016998	ncRNA		AF543541				X53654			1193		369	1563	1	0.764	0	0.838			2									195.319	0.164	35.6412																	6.303
IVGNm01118	AK017069	ncRNA	TRUE								1793			1794		1	0						1	1						432.622	0.241	-14.0987																	10.208
IVGNm01119	AK017082	ncRNA	TRUE								1531		7177	8708	2	0.176	0	1.306	1					1						148.755	0.097	3.6113																	6.191
IVGNm01120	AK017175	ncRNA				BC166020,D50411,NM_007400	NM_007400				1250		18	1269	1	0.986	0	0.8			1				1					239.598	0.192	-2.6981																	5.934
IVGNm01121	AK017240	ncRNA							AK002993		1540		835	2379	1	0.649	0	0.649			4			1						124.05	0.081	-23.9211																	11.497
IVGNm01122	AK017243	ncRNA		AK150085	AK035146						1658		109	1767	1	0.938	0	0.603			5		1	1		uc009hzg.1		AK017243	RIKEN full-length enriched library, clone:5430400D12 product:unclassifiable, full insert sequence.,Mus musculus 6 days neonate head cDNA	165.572	0.1	21.9988																	6.122
IVGNm01123	AK017263	ncRNA	TRUE								1143		28168	29311	1	0.039	0	0.875			1				1					278.42	0.244	-30.599																	6.3
IVGNm01124	AK017272	mRNA									1900	1422	24994	26894	10	0.071	0.748	5.263			3					uc009lwr.1	NM_008509	Lpl	lipoprotein lipase	1275.55	0.671	2654.08
IVGNm01125	AK017368	mRNA									795	351	102	897	1	0.886	0.442	1.258			1		1	1		uc009gpo.1		AK017368	RIKEN full-length enriched library, clone:5430431A17 product:unclassifiable, full insert sequence.,Mus musculus 6 days neonate head cDNA	29.092	0.037	-67.1009				47.9779	40.7855	41.8121	31.6468	34.2416	21.8542	27.7804	216.14	3.60233	0.841785	0.116432	80.6479	-317.834	8.788
IVGNm01126	AK017413,AK036958	ncRNA									2112			2112		1	0				4		1	1						342.1	0.174	-64.9789																	7.151
IVGNm01127	AK017419	mRNA									1186	320		1186		1	0.27				2		1	1						291.523	0.246	-488.659				48.4776	25.9544	27.9121	14.2192	14.2019	7.25006	13.6628	74.2592	1.23765	0.841948	0.337134	27.7985	-110.613	7.282
IVGNm01128	AK017469,AK032988	ncRNA							AK132861		2175			2175		1	0		1		1		1							441.119	0.254	-55.093				266.937	167.715	94.6787	57.0066	54.8815	38.1177	31.4981	47.7581	0.795968	0.981907	0.173822	30.7285	107.128	9.622
IVGNm01129	AK017823	mRNA									1384			1386		1	0						1	1						194.956	0.141					144.781	98.8935	23.0393	11.5966	13.4489	10.9637	14.2687	40.9492	0.682486	0.99464	0.110981	31.4173	58.7839	7.39
IVGNm01130	AK017962,AK020025,AK088640,NR_015548	ncRNA		U36758				D83484			2428		2364	3858	2	0.387	0	1.34					1	1		uc009kei.1		5830432E09Rik,AK020025	RIKEN full-length enriched library, clone:5830432E09 product:unclassifiable, full insert sequence.,Mus musculus adult male thymus cDNA	201.607	0.126	30.7782																	6.323
IVGNm01131	AK018023	mRNA									1454			1455		1	0		1		1				8					274.724	0.189																		9.816
IVGNm01132	AK018109	ncRNA				AK047578,BC157095	BC157095	AK081506	AK200002		1189		700	1889	1	0.629	0	0.841			2		1	1						19.154	0.016	7.0438																	6.598
IVGNm01133	AK018131	ncRNA							X56314		1295			1296		1	0				1		1	1						214.11	0.165																		4.651
IVGNm01134	AK018216,BC094367	mRNA									1224	473		1225		1	0				3	1	1							79.838	0.083	-88.6082																	5.817
IVGNm01135	AK018340	ncRNA							AK216298		1735			1736		1	0				3		1	3						171.429	0.099	-7.3674				98.4885	65.1408	82.4485	49.994	43.8747	22.0753	19.2788	289.25	4.82083	0.875591	0.0793268	114.246	-543.897	6.377
IVGNm01136	AK014157,AK018467,AK019505,AK051992,AK084084,AK084903,AK145781,NR_015510	mRNA		AK142206							3811	272	735	3811	1	0.807	0	1.495			9				1			4632427E13Rik		297.821	0.078	-422.289	TRUE			235.872	205.941	178.303	140.181	118.351	79.9926	67.555	234.005	3.90009	0.987179	0.0285642	161.804	422.568	9.939
IVGNm01137	AF016462,AF016464,AK018555,BC120753,NM_007490,NR_033804,S79913,X52991	mRNA									1257	858	27522	28386	3	0.03	0.556	2.387			3	2	1	1		uc009iov.1,uc009iow.1	NM_007490	Art2a,Art2a-ps	complete cds.,ADP-ribosyltransferase 2a,Mus musculus ADP-ribosyltransferase (Art2a) mRNA	99.907	0.079	131.361																	5.348
IVGNm01138	AK018603	ncRNA				AK028676,AK031647,BC031852,BC045616,NM_001159672,NM_175317	NM_001159672				1239			1239		1	0		2		3				4					45.53	0.037																		8.986
IVGNm01139	AK018838,AK018890	ncRNA						BC152918	BC065044		196			196		1	0						1							72.363	0.369																		5.362
IVGNm01140	AK007016,AK007155,AK018960,AK018969,BC049550,NR_027915	mRNA		BC028646	AK042654			AK144911			543	339		543		1	0.608									uc009jwf.1		1700120K04Rik	RIKEN full- length enriched library, RIKEN full-length enriched library, clone:1700086F19 product:hypothetical protein, clone:1700109M05 product:RIKEN cDNA 1700120K04) (Adult male testis cDNA, clone:1700113F03 product:hypothetical protein, clone:1700120K04 product:RIKEN cDNA 1700120K04 (Adult male testis cDNA, full insert sequence) (Adult male testis cDNA, full insert sequence).,Adult male testis…	38.4	0.08	265.07																	6.006
IVGNm01141	AK007016,AK018960,AK018969,NR_027915	mRNA		BC028646	AK042654			AK144911			543	339		543		1	0.608									uc009jwf.1		1700120K04Rik	RIKEN full- length enriched library, RIKEN full-length enriched library, clone:1700086F19 product:hypothetical protein, clone:1700109M05 product:RIKEN cDNA 1700120K04) (Adult male testis cDNA, clone:1700113F03 product:hypothetical protein, clone:1700120K04 product:RIKEN cDNA 1700120K04 (Adult male testis cDNA, full insert sequence) (Adult male testis cDNA, full insert sequence).,Adult male testis…	38.4	0.072	265.07																	8.902
IVGNm01142	AK019022,BC037083,NM_008260,X74938	mRNA		NM_026605				AK084119			2039	1504	8342	10258	2	0.187	0.519	1.044					1			uc009fkd.1,uc009fke.1	NM_008260	Foxa3	RIKEN full-length enriched library, clone:1810021N14 product:forkhead box A3, full insert sequence.,Mus musculus 10 day old male pancreas cDNA,forkhead box A3	1067.53	0.528	1714.32																	6.496
IVGNm01143	AK019048	ncRNA							NM_133743		238			238		1	0						2	6						20.832	0.088																		6.418
IVGNm01144	AK019327	ncRNA	TRUE					M36400			337			337		1	0													23.633	0.07		TRUE																6.141
IVGNm01145	AK019330,BC052191,NM_198190	mRNA						AK137126			1963	641	1522	3485	2	0.563	0	1.019					2	2		uc009gva.1	NM_198190	Ntf5	neurotrophin 5	848.289	0.432	1705.38				74.3695	68.7689	52.909	25.5627	20.304	8.06856	15.6183	140.871	2.34785	0.974839	0.0641383	87.8693	355.005	6.171
IVGNm01146	AK019505,AK051992,AK084084,AK145781	mRNA		AK142206							3811	272		3811		1	0				9									297.821	0.078	-34.1155	TRUE																15.726
IVGNm01147	AK019606	ncRNA	TRUE								499		28998	29497	2	0.017	0	4.008					1							89.363	0.179																		6.735
IVGNm01148	AK019619	mRNA									2310		149781	152091	7	0.015	0	3.03			2		1	1						510.662	0.221	210.943																	6.588
IVGNm01149	AK019648	ncRNA							AK040916		292		5385	5677	1	0.051	0	3.425												26.259	0.09	-71.0642																	6.479
IVGNm01150	AK019737,AK133210,AK133230	mRNA									3210	317		3210		1	0.099		1		6	3	2	1		uc009keb.1		AK019737	RIKEN full-length enriched library, clone:4930544L04 product:unclassifiable, full insert sequence.,Mus musculus adult male testis cDNA	265.024	0.083	12.5556																	8.62
IVGNm01151	AK019758	ncRNA	TRUE	AK076904							400			400		1	0													18.875	0.047																		4.837
IVGNm01152	AK019937	ncRNA		NM_133711					NM_001172152		1117		31321	32438	1	0.034	0	0.895	1		5		1	1						100.935	0.09	-48.8503																	5.475
IVGNm01153	AK019944	ncRNA				AK010534,AK031738,AK086646,AK155236,BC008128,NM_133740	AK010534				752			752		1	0				2		1							34.612	0.046	-29.6292																	9.399
IVGNm01154	AK019946	mRNA									1119	600		1120		1	0.536				1				4					79.736	0.071	-1014.12																	15.445
IVGNm01155	AK020101	ncRNA				BC156432	BC156432	NM_153679			773		3102	3875	3	0.199	0	3.881			1		1			uc009gse.1		AK020101	RIKEN full-length enriched library, clone:6530437J22 product:unclassifiable, full insert sequence.,Mus musculus 10 days neonate cerebellum cDNA	317.493	0.411																		6.954
IVGNm01156	AK020153	ncRNA				AK042625,AK042860	AK042625				710			710		1	0				1									77.943	0.11	-0.5745																	4.969
IVGNm01157	AK020189	ncRNA				BC042662	BC042662				1224			1224		1	0				1		1	1						74.386	0.061	-14.2186	TRUE	linc1563		25.0299	22.6175	15.9052	10.7258	12.8067	6.57835	11.6708	84.3366	1.40561	0.911837	0.210344	38.6105	-457.627	6.444
IVGNm01158	AK020195	ncRNA				AB025413,AF059485,AK147329,AK147579,NM_011858	AK147329				1097			1097		1	0				1				5					65.612	0.06																		5.155
IVGNm01159	AK020218,AK054473,AK077348,AK079363,AK132677,BC010496,NM_009383	mRNA							AK054473		4301	1176	17496	21737	12	0.195	0.062	2.79	1		3	1	1			uc009jyy.1,uc009jyz.1,uc009jza.1	NM_009383	Tial1	Tial1 cytotoxic granule-associated RNA binding	3293.17	0.766	1206.41				276.01	294.416	239.858	175.732	124.231	89.2514	68.8869	249.675	4.16125	0.982421	0.0317322	163.302	530.003	7.76
IVGNm01160	AK020221	ncRNA				AK128914,AK145877,AK146413,AK168851,BC008119,NM_016978	NM_016978	AK212323			973			973		1	0				5			1						99.287	0.102																		5.554
IVGNm01161	AK020245	mRNA									1156		124821	125977	1	0.009	0	0.865			2		1	1						260.671	0.225	12.4441																	6.001
IVGNm01162	AK020274	ncRNA	TRUE					AK136817			543			543		1	0		1				2	1						19.679	0.036	-84.9821																	10.759
IVGNm01163	AK020294	mRNA						AK079271			241			241		1	0													10.696	0.044																		5.426
IVGNm01164	AK020324,DQ227499,DQ664198,NM_001080942	mRNA									530	396	15730	16202	4	0.029	0	8.475			1		1	1		uc009ffx.1	NM_001080942	9230107M04Rik	bovine seminal plasma protein-like 2	135.775	0.268	-31.7097				29.8969	26.5897	25.8942	20.4453	25.6415	12.6686	17.8313							5.757
IVGNm01165	AK007112,AK020344	ncRNA	TRUE								801		4857	5614	2	0.135	0	2.642					1	1		uc009jzq.1		AK007112	RIKEN full-length enriched library, clone:1700102J08 product:unclassifiable, full insert sequence.,Mus musculus adult male testis cDNA	100.436	0.133	-10.502																	5.368
IVGNm01166	AK020358	ncRNA				AK004602,AK132455,BC024631,D83484,NM_011212,U35368,U62387	D83484				1268			1270		1	0				1									16.525	0.013	-22.3071																	5.489
IVGNm01167	AK020387	ncRNA							NM_133740		1129		3983	5112	1	0.221	0	0.886			2		1	4						12.684	0.011	-2.1591																	5.152
IVGNm01168	AK020472	ncRNA		NM_001172100				AK208491	AK036368	AK145173,NM_001172100	1146			1146		1	0						2	2						195.64	0.171	3.9991																	7.925
IVGNm01169	AK020523	ncRNA					NM_172482			AK044684,AK083143,BC081548,NM_172482	706			706		1	0				3									203.771	0.289	-11.7782																	6.277
IVGNm01170	AK020593	ncRNA				BC042662	BC042662	AK135796			948			948		1	0				1			1						104.446	0.11	-97.778				57.0386	43.83	45.1046	31.3199	25.5119	12.305	19.2615	207.68	3.46133	0.928074	0.0774519	100.143	-2812.68	7.502
IVGNm01171	AK020651	ncRNA				AK011112,AK051677,AK054462,AK166282,BC026424,BC055022,BC089575,NM_028243	AK011112				694			694		1	0				2		1	4						30.071	0.043																		5.245
IVGNm01172	AK014218,AK020685,AK044679,AK138426,NM_144925	mRNA							BC005741		8479	5688	62933	71412	23	0.119	0	2.867	1		5	1	1	3		uc009jpc.1,uc009jpe.1,uc009jpf.1	NM_144925	Tnrc6a	trinucleotide repeat containing 6A	7983.26	0.947	1178.01				781.903	585.386	321.246	260.68	269.957	207.542	182.589	49.2411	0.820685	0.98544	0.150451	32.9465	97.4259	9.911
IVGNm01173	AK020687	mRNA					BC044761			AK030993,BC044761,BC046530,NM_177158	611			611		1	0				1									60.526	0.099	-58.3259																	6.019
IVGNm01174	AK020709	ncRNA	TRUE								699			699		1	0				1				1																								10.576
IVGNm01175	AK020732,AK051086,AK054320,AK087668,AK155884,BC027571,BC062186,NM_010513	mRNA		AK040698					NM_010513		11978	4107	269433	281411	20	0.043	0	1.747			15	2	4	6		uc009hja.1,uc009hjc.1	NM_010513	Igf1r	insulin-like growth factor I receptor	6844.23	0.651	7533.12				191.825	211.264	132.962	99.6652	63.211	33.5001	27.2533	188.548	3.14246	0.972659	0.0508814	114.936	524.415	6.356
IVGNm01176	AK020774	ncRNA	TRUE	AK034466						AK034466,AK042342,AK088086,AK137827,AK149603,AK149717,AK150584,AK151998,AK153186,AK159375,AK160016,BC112911,M27959,M27960,M29854,NM_001008700	289			289		1	0													34.989	0.121																		8.851
IVGNm01177	AK020799	ncRNA	TRUE								1176			1178		1	0				4									160.962	0.137	-32.8775																	8.376
IVGNm01178	AK020838	ncRNA						NM_001159672			1027			1027		1	0				7		1							22.936	0.022	-45.9667																	10.591
IVGNm01179	AK020849,AK139237	ncRNA				BC157963,BC158019,NM_001081022	NM_001081022				2470			2470		1	0				1		1	1						299.362	0.197																		6.66
IVGNm01180	AK020866	ncRNA	TRUE								880			880		1	0				5				7					142.377	0.162	-21.4585																	11.971
IVGNm01181	AK020867	mRNA						AK009950	AK179005		2560		1392	3952	3	0.648	0	1.172			1		1			uc009flv.1		AK020867	RIKEN full-length enriched library, clone:A930016O22 product:hypothetical protein, full insert sequence.,Mus musculus adult retina cDNA	569.73	0.223	112.263																	6.445
IVGNm01182	AK020892,AK048940	ncRNA				AK089115,AK156631,BC132495,BC137904,BC145024,NM_021889	AK089115				2018			2018		1	0				1		1		7					114.134	0.075	-2.964																	6.148
IVGNm01183	AK020907,AK161464	ncRNA						AK154558	AK086292		3965			3965		1	0				3			1						312.029	0.094	28.3784																	5.629
IVGNm01184	AK020990	ncRNA				AF388675,AK030221,AK039754,BC140302,BC146460,NM_011807	NM_011807				971			971		1	0				2									37.404	0.039	-89.9971																	5.804
IVGNm01185	AK021007	ncRNA									739		26930	27669	1	0.027	0	1.353								uc009ihq.1		AK021007	RIKEN full-length enriched library, clone:B230218P12 product:unclassifiable, full insert sequence.,Mus musculus adult male corpora quadrigemina cDNA	450.264	0.609																		8.534
IVGNm01186	AK021109,AK034027,AK038554	ncRNA	TRUE								2988		47909	50188	3	0.045	0	2.179			4		6	5	7	uc009keo.1,uc009kep.1		AK034027,AK038554	RIKEN full-length enriched library, clone:C030029H02 product:unclassifiable, full insert sequence.,Mus musculus adult male corpus striatum cDNA	86.368	0.032	15.6765																	6.402
IVGNm01188	AK021117	ncRNA			AK041721			AK037770			1260			1264		1	0				1		1	2						518.205	0.411					51.0614	39.2338	41.5568	26.1145	19.8385	6.9331	13.4875	218.589	3.64314	0.930703	0.0725613	106.169	-3712.7
IVGNm01189	AK021131	ncRNA				AF388675,AK046525,BC140302,BC146460,NM_011807	NM_011807				740			740		1	0				2		1	1						43.662	0.059																		9.54
IVGNm01190	AK021135,AK140966,AK141645,BC060708,NM_001112731,NM_198417	mRNA		AK043671,BC028668							4610	1947	27232	31822	5	0.144	0	1.109	1		8	1	1			uc009fwx.1,uc009fwy.1	NM_198417	C030039L03Rik	hypothetical protein LOC112415	575.069	0.131	29.1789				26.9416	16.0217	20.433	11.3368	14.5145	7.81096	15.0352							7.92
IVGNm01191	AK021146,AK039669,NM_025504	mRNA						X53654		BC024867	2389	771	3669	6058	5	0.394	0.323	2.095	1		3	1	1			uc009ftf.1	NM_025504	2310004L02Rik	hypothetical protein LOC66349	445.522	0.187	366.339																	15.439
IVGNm01192	AK021148	ncRNA				AF503502,AK035163,AK129285,BC058704,BC080277,NM_148946	AK035163				1226			1226		1	0													215.474	0.176	-47.4749																	6.616
IVGNm01193	AK021169	ncRNA	TRUE					AK210172.4			911			912		1	0							1	6					119.548	0.131																		5.477
IVGNm01194	AK021219	ncRNA		BC160337	DQ225768				NM_001127351		1077		7392	8469	3	0.127	0	2.786					1	3						196.288	0.182	12.0523																	5.523
IVGNm01195	AK021221,NM_030101	mRNA									955	390	26671	27626	3	0.034	0.408	3.148			1	1				uc009hjd.1		C330024D12Rik,Pgpep1l	RIKEN full-length enriched library, clone:C330024D12 product:hypothetical Pyrrolidone carboxyl peptidase (pyroglutamate aminopeptidase) structure containing protein, full insert sequence.,ES cells cDNA	259.587	0.272	750.992																	5.834
IVGNm01196	AK021246	ncRNA				AK049609,AK140908,AK142284,AK163446,BC096553,BC156426,NM_011083,U52193,U55772	NM_011083				955			957		1	0				2			1	3					178.052	0.186																		5.572
IVGNm01197	AK021266	ncRNA		AK171328					NM_030566	AF020526,AF380422,AF421138,AF421139,AK148085,AK154655,AK168439,AK170444,AK171328,BC051978,NM_001081459,NM_011363	1057			1058		1	0				1									125.381	0.119																		5.813
IVGNm01198	AK021305	ncRNA	TRUE	NM_001085385				AK181724.2		AK005449,AK032342,AK146474,BC010476,BC019834,BC085480,BC092099,NM_001085385,NM_028166	216			216		1	0						1							14.857	0.069																		6.134
IVGNm01199	AK021370,AK153701,NM_001040131,NM_013507	mRNA							AK195045		7760	2100	7400	15046	21	0.508	0	2.706	1		10		1	1		uc009jfy.1,uc009jfz.1	NM_001040131,NM_013507	Eif4g2	eukaryotic translation initiation factor 4	4486.48	0.578	1387.88				2345.79	2264.37	2210.13	2139.72	1792.01	2231.27	2443.89							8.192
IVGNm01200	AF462391,AK007988,AK027913,BC043336,BC054469,NM_001114322,NM_028069	mRNA									2629	2493	5559	7702	14	0.277	0.554	6.103			2		1	1		uc009kkj.1,uc009kkk.1	NM_028069	Cdhr5,Mupcdh	mucin-like protocadherin	396.359	0.175	1677.09																	6.25
IVGNm01201	AK028022,NM_001081115	mRNA									1530	873	2128	3658	5	0.356	0.243	4.266					1			uc009fzg.1	NM_001081115	1190020J12Rik	hypothetical protein LOC233038	550.236	0.433	986.682																	6.855
IVGNm01202	AF011758,AK028056,AK029078,AK029926,BC037658,NM_009281	mRNA		AK132253				AK005418			3016	1914	30899	33691	15	0.079	0.626	5.701	1	1	6	2	2	1		uc009jew.1,uc009jex.1	NM_009281	Zfp143	zinc finger protein 143	2651.28	0.926	2717.5				49.2973	31.2315	23.164	9.01229	8.57455	5.85244	13.0902	60.3453	1.00576	0.94572	0.235594	30.9603	1186.01	8.787
IVGNm01203	AK028238,BC009652,BC039140,NM_011322,U85786	mRNA									1515	657	8994	10500	6	0.13	0.407	3.984					1	1		uc009gie.1	NM_011322	Scn1b	beta, type I, voltage-gated,sodium channel	1308.6	0.864	891.931				944.147	1052.89	827.273	704.208	520.982	447.283	273.035	331.501	5.52502	0.961437	0.0380321	179.999	2093.88	6.772
IVGNm01204	AK016573,AK028404,AY236495,AY263159,BC046390,BC108382,NM_001105252,NM_028930	mRNA									3883	2901	74015	77789	22	0.047	0.747	7.303					1			uc009jke.1,uc009jkf.1,uc009jkg.1	NM_028930	Tmc5	Tmc5 protein,Tmc5 protein.	1829.77	0.654	1398.27																	7.388
IVGNm01205	AK028520	ncRNA						BC048183	NM_001039534		3578			3578		1	0				15		1	1						1571.34	0.439	29.3067																	10.473
IVGNm01206	AK028547	ncRNA	TRUE								2761		522	3285	1	0.841	0	0.362			1		1									15.6964																	5.847
IVGNm01207	AK014654,AK029357	ncRNA						NM_001162950		AF060194,BC120587,NM_016868	905			905		1	0						2	2						81.16	0.09																		10.557
IVGNm01208	AK016371,AK016625,AK029607,AK161407,BC115646,BC115647,NM_173409	mRNA		BC048662							1822	990	6776	8598	2	0.102	0.542	2.587					1	1		uc009kay.1	NM_173409	4933402N03Rik	hypothetical protein LOC233918	196.364	0.134	300.029																	7.628
IVGNm01209	AK029729,AK042481,AK147860,AK161453,NR_015574	mRNA		BC172105							3726	582	12096	14899	3	0.188	0.156	1.07			7			1	7	uc009mzf.1		4930513N10Rik,AK147860	RIKEN full-length enriched library, clone:G270070H02 product:unclassifiable, full insert sequence.,Mus musculus melanocyte cDNA	768.582	0.23	8.2716
IVGNm01210	AK029736,AK043830,AK122359,AK139478,AK140104,AK147261,AK159028,BC060224,BC079568,NM_001109753,NM_153579	mRNA		AK035406							5523	2049	188845	194368	12	0.02	0.371	3.179	2	2	8	3	1	1		uc009hwj.1,uc009hwk.1,uc009hwl.1	NM_153579	Sv2b	synaptic vesicle glycoprotein 2 b	2471.47	0.583	2784.9																	7.248
IVGNm01211	AK030228	ncRNA	TRUE								2715		25394	28113	5	0.097	0	1.842	1		7									275.452	0.101	-30.2737																	6.069
IVGNm01212	AK030232,AK044981,AK132409,BC067407,D61689,NM_001025559,NM_001025560,NM_011445	mRNA		AK030226,AK190283,AK205049					D61689		8231	2481	559322	567401	16	0.014	0.287	1.945	3	1	18		1	1		uc009jin.1,uc009jio.1,uc009jip.1,uc009jiq.1,uc009jir.1,uc009jis.1	NM_001025559,NM_001025560,NM_011445	Sox6	SRY (sex determining region Y)-box 6 isoform 1,SRY (sex determining region Y)-box 6 isoform 2,SRY (sex determining region Y)-box 6 isoform 3	6263.64	0.761	2155.08																	6.345
IVGNm01213	AK030246	mRNA									2467	1167	14247	16714	3	0.148	0.473	1.216					1	1		uc009gwo.1	NM_019934	Sec1	secretory blood group 1	736.738	0.299	1468.42																	6.808
IVGNm01214	AK030497	mRNA									3397	661		3399		1	0.195		1		5									344.993	0.102	-423.152																	7.232
IVGNm01215	AK031173	ncRNA						NM_001145937			2728		16335	19063	4	0.143	0	1.466			3			2						1166.56	0.428	17.4809																	5.539
IVGNm01216	AK018258,AK031224,NM_001145880	mRNA							NM_146185		4435	2337	11536	15971	4	0.278	0	0.902			9		1	1				Zfp790		278.579	0.063	422.605																	13.371
IVGNm01217	AB041581,AK008106,AK012859,AK028734,AK031255,AK041427,AK076051,AK076184,AK154755,AK183552,AK196701,BC038499,NM_023647	mRNA		AK140288	AK052509,AK213711						3625	1077	27993	31207	6	0.021	0.419	7.481	2	1	8	5	1	1		uc009hdp.1,uc009hdq.1	NM_023647	Nipa2	non-imprinted in Prader-Willi/Angelman syndrome	1357.9	0.868	978.46				352.166	307.294	276.996	185.951	106.712	67.7944	60.0343	212.447	3.54079	0.989827	0.0276439	152.613	349.46	8.751
IVGNm01218	AK031403	mRNA					AK013524				2656		468	3125	1	0.85	0	0.377			1		1	1						398.627	0.15																		6.234
IVGNm01219	AK031468,AK047116,AK087602	mRNA	TRUE								3444			3444		1	0		1		9		2	3		uc009jgb.1		AK031468	RIKEN full-length enriched library, clone:6030437H22 product:unclassifiable, full insert sequence.,Mus musculus 13 days embryo male testis cDNA	967.486	0.281	99.1406				27.4143	13.3573	19.8514	13.384	16.6226	12.2696	28.8084							6.055
IVGNm01220	AK031772,BC082606,NM_001167872,NM_001167873	mRNA							NM_001033355		7183	2013	37148	44328	9	0.16	0	1.253			10	1	1	2				Zfp568		1138.31	0.164	819.321				717.937	449.832	192.154	134.439	120.948	98.3427	76.1864	39.4893	0.658155	0.994402	0.117785	30.1327	57.2735	6.472
IVGNm01221	AK031745,AK031995,AK122324	mRNA		AK042978				AK212323	AK122324		5038	1683	75894	80932	7	0.062	0	1.456	1		3	3	1	3						1478.39	0.293	2349.18				609.194	481.369	158.564	94.9569	82.594	73.9015	70.0388	53.0171	0.883618	0.991905	0.10291	38.8621	83.3914	8.537
IVGNm01222	AK032194	mRNA		AK050718							2882	273	1427	4309	1	0.669	0.095	0.347			2					uc009iiv.1		AK032194	RIKEN full-length enriched library, clone:6430411D10 product:unclassifiable, full insert sequence.,Mus musculus adult male olfactory brain cDNA	470.322	0.163	-116.048																	5.904
IVGNm01223	AK032244	ncRNA							M36515		2433			2433		1	0				4		2	3						66.537	0.027	34.4095
IVGNm01224	AK032343	ncRNA	TRUE					M36400			3412		30875	34287	2	0.1	0	0.586	1		3		1	1		uc009hyl.1		AK032343	RIKEN full-length enriched library, clone:6430523C15 product:unclassifiable, full insert sequence.,Mus musculus adult male olfactory brain cDNA	514.838	0.151	-38.0955																	5.218
IVGNm01225	AK032433	ncRNA				AF035399,AF035400,AY336094,BC139764,NM_008746,NM_182809	NM_008746				3706		95	3802	1	0.975	0	0.27	2		9				7					474.169	0.128	-43.2755																	7.367
IVGNm01226	AK017469,AK032988	ncRNA							AK132861		2175			2175		1	0		1		1		1							441.119	0.254	-55.093				2155.97	1706.32	675.869	439.063	390.404	290.417	211.885	58.6775	0.977958	0.991636	0.0932393	42.9795	92.441	5.877
IVGNm01227	AK033068,BC147245,BC147246,BC151033,BC151035,NM_001081424	mRNA			AK009284,BC063760						2513	1344	2935	5448	4	0.378	0.453	2.247					1	1		uc009iqw.1	NM_001081424	Chrna10	alpha, nicotinic,cholinergic receptor	1269.13	0.673	2110.32																	5.73
IVGNm01228	AB022340,AF068246,AK033461,AK077247,AK143946,AK165516,AY064696,BC015248,NM_016870,NM_212441,NM_212442	mRNA			AK029056,AK135821,AK160698			AK015831			3295	1866	23295	26590	16	0.094	0.4	6.301	1		6	4	2	1		uc009jlq.1,uc009jlr.1,uc009jls.1,uc009jlt.1	NM_016870,NM_212441,NM_212442	Acsm3	SA hypertension-associated homolog	1912.62	0.726	802.333																	5.483
IVGNm01229	AK029511,AK029888,AK033599,AK048925,AK133339,BC030885,BC100433,BC145456,NM_028665	mRNA		AK131858	BC115973						3542	1581	52592	55313	12	0.045	0.296	6.563			8	4	1	4		uc009ihx.1,uc009ihy.1,uc009ihz.1,uc009iia.1	NM_028665	Ankrd42	Ankyrin repeat domain-containing protein 42.,ankyrin repeat domain 42	1521.65	0.764	940.174																	6.634
IVGNm01230	AK034016	ncRNA		NM_001164580							2347		1775	4122	2	0.569	0	0.852			3		1	2		uc009jmv.1		AK034016	RIKEN full-length enriched library, clone:9030407P20 product:unclassifiable, full insert sequence.,Mus musculus adult male colon cDNA	454.487	0.194	-6.9736																	5.644
IVGNm01231	AK034027	ncRNA	TRUE								2279		47909	50188	3	0.045	0	1.316			4		6	5		uc009kep.1		AK034027	RIKEN full-length enriched library, clone:C030029H02 product:unclassifiable, full insert sequence.,Mus musculus adult male corpus striatum cDNA	41.653	0.018	15.6765																	5.526
IVGNm01232	AK034106	ncRNA	TRUE					AK077481			2720		870	3590	1	0.758	0	0.368			11		1							37.396	0.014	-14.7658
IVGNm01233	AK034107	ncRNA	TRUE								3313		39336	42650	5	0.078	0	1.509			4		1							196.074	0.059	2.9935																	6.15
IVGNm01234	AK034119,AK148518,AK148546,AK162324,AK164547,NM_001164580	mRNA		AK034016					AK148546		4842	811	52393	57235	2	0.085	0	0.473	2		10		1	1		uc009jmy.1		BC030336	RIKEN full-length enriched library, clone:D330036B13 product:hypothetical protein, full insert sequence.,Mus musculus 13 days embryo heart cDNA	3651.7	0.822	344.813				146.036	97.5788	100.275	67.7876	54.866	46.8926	43.0078	129.187	2.15311	0.907978	0.138362	58.9008	-668.349
IVGNm01235	AK034258	ncRNA									2329		122208	124538	4	0.019	0	1.717	3		4		1	3						289.284	0.124	26.6633																	7.054
IVGNm01236	AK034328	ncRNA				AK046263,BC138962,BC138963,BC148535,NM_008074,X59300	X59300				3739			3739		1	0				9									348.772	0.093	-55.7532																	4.927
IVGNm01237	AK034341	mRNA						AK084119	AK148755		3902		12889	16791	4	0.232	0	1.025			2			1		uc009fks.1		AK034341	RIKEN full-length enriched library, clone:9330180I18 product:unclassifiable, full insert sequence.,Mus musculus adult male diencephalon cDNA	331.591	0.085	57.5772																	6.15
IVGNm01238	BC070450	ncRNA							AF101042		6764		31528	38292	11	0.177	0	1.626	7		30		1			uc009heo.1		BC070450	Chr 7, ERATO Doi 715, RIKEN full-length enriched library, clone:9530058B15 product:DNA segment, expressed, full insert sequence.,Mus musculus adult male urinary bladder cDNA	511.96	0.076	-5.2854
IVGNm01239	AK034435	ncRNA	TRUE					AK139798			3916		4120	8038	1	0.487	0	0.255			1			1						231.893	0.059	21.2771																	5.674
IVGNm01240	AB206762,AK034197,AK035179,BC109163,NM_177694	mRNA							AB125740		7785	2904	80046	87681	21	0.087	0	2.698	1		6		1	1		uc009hcc.1,uc009hcd.1,uc009hce.1	NM_177694	Tmem16e	Transmembrane protein 16E (Gnathodiaphyseal dysplasia 1 protein homolog).,transmembrane protein 16E	2312.92	0.297	834.817																	14.015
IVGNm01241	AK011524,AK035191,AK045406,BC027158,NM_001166584,NM_001166585	mRNA									9962	1308	217524	227486	13	0.044	0	1.305	1		15	1	1	1		uc009jha.1		AK011524,Tead1	RIKEN full-length enriched library, clone:2610024B07 product:unclassifiable, full insert sequence.,Mus musculus 10 days embryo whole body cDNA	4714.8	0.501	1455.1				59.7032	50.953	62.9921	47.5236	43.0243	18.9278	20.083	552.327	9.20545	0.872516	0.0544029	183.742	-549.033
IVGNm01242	AK035251	ncRNA	TRUE								3815		233	4049	1	0.942	0	0.262			3									470.179	0.123	-4.283																	5.823
IVGNm01243	AK035364,AK135964,BC051202,BC086931,BC100346,NM_001163557,NM_008905,U79024	mRNA									3827	2715	146310	149620	25	0.008	0.344	7.251			2	1	1	3		uc009jbd.1,uc009jbe.1,uc009jbf.1,uc009jbg.1	NM_008905	Ppfibp2	F, F interacting protein, RIKEN full-length enriched library, binding protein 2, clone:7420442I03 product:protein tyrosine phosphatase, full insert sequence. (Fragment)., receptor-type,In vitro fertilized eggs cDNA,Liprin-beta-2 (Protein tyrosine phosphatase receptor type f polypeptide-interacting protein-binding protein 2) (PTPRF-interacting protein-binding protein 2) (Coiled-coil-like protein 1…	2704.84	0.867	2278.46				224.309	354.229	182.089	108.036	86.349	50.4623	54.2094	157.685	2.62808	0.809344	0.173896	55.7073	-189.845	8.101
IVGNm01244	AK035508,AK035645,AK078094,BC070450,NR_015456	ncRNA							AF101042		6764		31528	38292	11	0.177	0	1.626	7		30		1			uc009heo.1,uc009hep.1		AK035645,BC070450,D7Ertd715e	Chr 7, ERATO Doi 715, RIKEN full-length enriched library, clone:9530058B15 product:DNA segment, expressed, full insert sequence.,Mus musculus adult male urinary bladder cDNA	511.96	0.076	-49.4688	TRUE	linc1385		222.015	133.68	201.726	169.05	146.446	150.062	136.566							8.613
IVGNm01245	AK035526	ncRNA						U58494.5			1222		8553	9775	1	0.125	0	0.818			1		1							254.636	0.208	-232.131																	6.41
IVGNm01246	AK035596,NR_002452.2	mRNA									2106		11884	13990	2	0.15	0	0.951			1		1	1		uc009knz.1		AK035596,Nctc1	RIKEN full-length enriched library, clone:9530074L01 product:unclassifiable, full insert sequence.,Mus musculus adult male urinary bladder cDNA	101.195	0.048					44.1239	47.543	28.9246	18.7133	24.2477	13.5862	17.0054	98.7945	1.64657	0.894788	0.195903	43.1027	-338.254	9.223
IVGNm01247	AK035726	ncRNA	TRUE					AK212323			1820		2830	4650	4	0.391	0	2.198	2		5		1							251.319	0.138	-23.6318																	5.793
IVGNm01248	AK035900,AK047141	ncRNA	TRUE								3085		9033	12033	5	0.173	0	2.112			5		1			uc009kuu.1		AK047141	RIKEN full-length enriched library, clone:9630015P16 product:unclassifiable, full insert sequence.,Mus musculus 16 days neonate cerebellum cDNA	74.523	0.032	-11.9328
IVGNm01249	AK036338	mRNA		AK009626							4432	3038		4433		1	0.685		1	1	4	2	1							2112.71	0.477	1459.46																	8.759
IVGNm01250	AJ237917,AK036677,AK040866,AK045465,AK046935,AK049502,AK088881,AK129437,AK161060,AK210708,BC022222,BC057008,NM_011936	mRNA		AJ344253							4726	1506	351351	354906	8	0.006	0.244	7.874			8		2	1	6	uc009msq.1,uc009msr.1,uc009mss.1,uc009mst.1	NM_011936	Fto	similar to FTO	2751.52	0.849	2186.82				57.0819	57.7548	70.9321	50.9536	49.9568	28.0717	25.3399	779.09	12.9848	0.82038	0.0598009	189.544	-369.178	8.835
IVGNm01251	AK004733,AK036763,AK076217,AK129062,BC058370,BC080856,NM_027883	mRNA									4310	3438	21011	24812	16	0.13	0.529	5.286			1		1	1		uc009fhg.1,uc009fhh.1,uc009fhi.1,uc009fhj.1	NM_027883	Dhx34,mKIAA0134	RIKEN full-length enriched library, clone:1200013B07 product:KIAA0134 RNA HELICASE (HRH1) (FRAGMENT) homolog [Homo sapiens], full insert sequence.,DEAH (Asp-Glu-Ala-His) box polypeptide 34,Mus musculus adult male lung cDNA	2681.59	0.736	4683.47																	6.775
IVGNm01252	AF031467,AK037482,AK137049,AK145300,AK160159,BC017688,BC048072,NM_009737,U68526	mRNA		AK137126							1892	1182	17788	19358	11	0.048	0.369	9.167	1		1		1	1		uc009gwc.1,uc009gwd.1	NM_009737	Bcat2	branched chain aminotransferase 2	924.559	0.681	1998.64				31.1085	29.5417	37.4026	27.7358	27.9923	14.8407	16.7898	654.204	10.9034	0.747524	0.0778569	148.671	-272.546	9.822
IVGNm01253	AK037524	mRNA									2832	177	1159	3993	2	0.71	0.062	0.706			10		1	1						236.023	0.083	271.229																	5.497
IVGNm01254	AK037763,AK153701,NM_001040131,NM_013507	mRNA							AK195045		7760	2100	7400	15046	21	0.508	0	2.706	1		10		1	1		uc009jfy.1,uc009jfz.1	NM_001040131,NM_013507	Eif4g2	eukaryotic translation initiation factor 4	4486.48	0.578	1387.88				579.188	520.381	531.219	486.304	472.803	503.154	517.125							6.222
IVGNm01255	AK037811	ncRNA		AK154666				AK142511		AK142511,AK154666,AY165628,BC111108,BC138819,BC138820,BC152357,BC152358,NM_175649	703			703		1	0													81.377	0.116	7.8968																	5.209
IVGNm01256	AK037841	ncRNA		AK015406					AB066608		705		3574	4279	1	0.165	0	1.418					2	2		uc009mms.1		AK037841	RIKEN full-length enriched library, clone:A130053L16 product:unclassifiable, full insert sequence.,Mus musculus 16 days neonate thymus cDNA	48.458	0.069																		5.103
IVGNm01257	AK037915	ncRNA				BC052191,NM_198190	BC052191	AK137126		BC052191,NM_198190	631			631		1	0				1									221.427	0.351	-61.9274																	6.459
IVGNm01258	AK038019	ncRNA		NM_010485			AK043043			AK011870,AK034536,AK075818,AK078333,AK080365,AK148528,BC016194,NM_010485	2461			2461		1	0		1		3									311.707	0.127	-17.4143	TRUE																5.349
IVGNm01259	AK038121	ncRNA				AK040218,AK138870,AK163869,NM_001033378	AK163869				2910		740	3650	1	0.797	0	0.344			1				7					313.186	0.108	3.2803				93.2257	90.5277	77.2559	68.2482	65.9052	40.4693	50.4939	248.132	4.13553	0.928551	0.0661469	118.399	-2591.92	8.941
IVGNm01260	AK038253	ncRNA									3637			3637		1	0				6		1	1						479.215	0.132	-13.8343																	6.145
IVGNm01261	AK038722,AK078191,NR_015533	ncRNA	TRUE								3335		219721	223056	8	0.009	0	3.992	2		4		1	1		uc009hfa.1		A230057D06Rik,AK078191	RIKEN full-length enriched library, clone:4932408B14 product:unclassifiable, full insert sequence.,Mus musculus adult male testis cDNA	69.095	0.034	27.0374																	5.61
IVGNm01262	AB195430,AJ563420,AK038747,AK078344,AK080753,AK165873,BC013673,BC032283,BC138219,BC138220,NM_027514,U35836	mRNA									2857	1227	14678	17535	7	0.077	0.428	5.705			5		1	1		uc009fno.1	NM_027514	Pvr	poliovirus receptor	205.721	0.085	151.67				33.5101	25.1601	35.9018	28.3808	25.0518	14.4894	12.5046	812.821	13.547	0.795588	0.0641743	181.339	-327.444	8.28
IVGNm01263	AK038880,AK044626	ncRNA						AK077368			1503		7427	8712	4	0.147	0	3.113			1					uc009jgv.1		AK038880	RIKEN full-length enriched library, clone:A230071N21 product:unclassifiable, full insert sequence.,Mus musculus adult male hypothalamus cDNA	211.326	0.164	-75.4517				47.5845	45.5631	58.4472	41.7405	48.9489	42.3239	50.2903							6.641
IVGNm01264	AK009937,AK038968,AK049123,NM_024248	mRNA			AK217371						2010	1656	34908	36755	14	0.049	0.458	7.709			1		1			uc009kvh.1,uc009kvi.1,uc009kvj.1		AK049123,Cars2	RIKEN full-length enriched library, clone:2310051N18 product:hypothetical Cysteinyl-tRNA synthetase containing protein, full insert sequence., mitochondrial precursor (EC 6.1.1.16) (Cysteine--tRNA ligase) (CysRS).,Mus musculus adult male tongue cDNA,Probable cysteinyl-tRNA synthetase	588.645	0.319	1942.27				424.156	408.807	447.083	413.344	358.247	274.432	183.133	1535.76	25.5959	0.958818	0.0244398	438.071	-1019.95	10.546
IVGNm01265	AK039079	ncRNA	TRUE								2675			2675		1	0				13		1							49.251	0.018	-58.441				25.9376	13.6542	21.0484	9.31925	12.1711	4.70904	7.7827							5.131
IVGNm01266	AK039159,AK047741	mRNA		BC145661							2071	474	5521	7301	3	0.244	0.222	1.685			1	1	1	1		uc009mpb.1,uc009mpc.1		AK039159,AK047741	RIKEN full-length enriched library, clone:A230103J11 product:unclassifiable, full insert sequence.,Mus musculus adult male hypothalamus cDNA	789.611	0.406	-42.0515																	6.905
IVGNm01267	AK039356	mRNA									1060		62448	63508	2	0.017	0	1.887			3		1			uc009gko.1		mKIAA0390	RIKEN full-length enriched library, clone:5330440A01 product:weakly similar to KRUEPPEL PROTEIN (FRAGMENT) [Psychoda cinerea], full insert sequence.,Mus musculus adult male pituitary gland cDNA	244.661	0.231
IVGNm01268	AK039356	mRNA									1060		62448	63508	2	0.017	0	1.887			3		1			uc009gko.1		mKIAA0390	RIKEN full-length enriched library, clone:5330440A01 product:weakly similar to KRUEPPEL PROTEIN (FRAGMENT) [Psychoda cinerea], full insert sequence.,Mus musculus adult male pituitary gland cDNA	244.661	0.231																		5.003
IVGNm01269	AK039375,AK154547,AK167496,BC067015,NM_008776,U57746	mRNA			NM_001110132						870	696	2037	2907	5	0.292	0.676	5.952					1		1	uc009fsf.1,uc009fsg.1	NM_008776	Pafah1b3	RIKEN full-length enriched library, alpha1 subunit, clone:A330034H16 product:platelet-activating factor acetylhydrolase, full insert sequence., isoform 1b,Adult male spinal cord cDNA,platelet-activating factor acetylhydrolase	675.576	0.794	1364.62				2100.31	2000.58	1944.64	1462.17	850.026	373.209	238.955	354.744	5.9124	0.982557	0.0241288	225.746	827.737	10.821
IVGNm01270	AK039409	ncRNA		AK015406					AB066608		2799		11061	13860	2	0.202	0	0.715			10		1	1						980.388	0.35	13.4205																	7.605
IVGNm01271	AK035508,AK035645,AK039454,AK080843,BC070450,NR_015456	ncRNA							AF101042		6764		31528	38292	11	0.177	0	1.626	7		30		1			uc009heo.1,uc009hep.1		AK035645,BC070450,D7Ertd715e	Chr 7, ERATO Doi 715, RIKEN full-length enriched library, clone:9530058B15 product:DNA segment, expressed, full insert sequence.,Mus musculus adult male urinary bladder cDNA	511.96	0.076	-5.2854	TRUE	linc1385															4.984
IVGNm01272	AK039455,BC112432,BC165989,NM_001081151	mRNA									2652	1791	44400	47052	10	0.039	0.586	5.58			3					uc009nox.1	NM_001081151	Gan	giant axonal neuropathy	1595.61	0.836	4732.68				75.036	85.6335	75.2006	56.0431	46.776	26.2314	23.5648	360.457	6.00761	0.955229	0.0387839	186.447	5403.42	7.544
IVGNm01273	AK039482,NR_001461.2	ncRNA						NM_008434			83437			83437		1	0		16		142			1				Kcnq1ot1		5711.74	0.068	-10.3977		Kcnq1ot1	Kcnq1ot1														6.361
IVGNm01274	AK039566,AK046883,AK081318,AK083153,AK087754,AK136705,AK149917,AK153732,AK170821,BC017607,BC035449,NM_001042655	mRNA		NM_026270	AK172393,U70430			BC156432			7045	1935	5703	12750	16	0.263	0.275	7.862			2		1	1		uc009grc.1	NM_001042655	Tbc1d17	member 17,TBC1 domain family	2795.99	0.806	3044.76				706.315	795.093	728.974	537.814	285.326	133.768	130.784	323.584	5.39306	0.948938	0.0448308	164.385	10254.8	11.812
IVGNm01275	AK039636,NR_001461.2	ncRNA						NM_008434			83437			83437		1	0		16		142							Kcnq1ot1		5711.74	0.068	-57.2365		Kcnq1ot1	Kcnq1ot1
IVGNm01276	AK039657	ncRNA							AK083267		975		18090	19065	4	0.051	0	4.103								uc009kok.1		AK039657	RIKEN full-length enriched library, clone:A330079A07 product:hypothetical protein, full insert sequence.,Mus musculus adult male spinal cord cDNA	168.771	0.173	38.7941				32.4994	28.8676	33.5201	21.853	21.1235	14.9461	24.9788							6.119
IVGNm01277	AK039837	ncRNA	TRUE								847		12114	12961	2	0.065	0	2.361			1					uc009mvi.1		AK039837	RIKEN full-length enriched library, clone:A430017B15 product:unclassifiable, full insert sequence.,Mus musculus 0 day neonate thymus cDNA	125.622	0.148	-78.926																	8.993
IVGNm01278	AK014071,AK014141,AK036717,AK040002,AK050655,AK147377,AK160156,AK160200,BC006876,BC061063,NM_001142681,NM_026522	mRNA			AK206458,AK216059		NM_001142681	AK009735			6759	1188	42757	46722	12	0.031	0	8.922			5	3		1	4	uc009klp.1,uc009klq.1	NM_026522	Chid1	chitinase domain containing 1	1388.22	0.721	2095.69				41.9027	35.1898	44.8241	32.6714	32.4966	23.6383	21.345	577.913	9.63188	0.807665	0.0682307	159.099	-354.023	10.925
IVGNm01279	AK040108	mRNA									924	309	842	1766	2	0.523	0.334	2.165						1		uc009hhf.1		Lrrk1	RIKEN full-length enriched library, clone:A430062H02 product:unclassifiable, full insert sequence.,Mus musculus 0 day neonate thymus cDNA	43.936	0.048	102.955				75.3893	68.7197	70.6795	52.5416	51.2422	33.4337	38.5044	276.769	4.61282	0.923799	0.062597	128.336	-1767.36	6.563
IVGNm01280	AK040132	ncRNA				AK051862,BC127083,NM_008855,X53532,X59274	X59274				3150			3150		1	0				5									296.069	0.094	-7.3624				29.4338	22.337	30.041	22.8696	25.1264	21.7568	25.4403							5.614
IVGNm01281	AK040261,AK162418,NM_013886	mRNA		AK138678	AK172145				AK014849		5868	606	47336	53204	5	0.091	0	1.057	2		11		1			uc009icr.1	NM_013886	Hdgfrp3	related protein,hepatoma-derived growth factor	2454.35	0.452	370.043				25.4032	16.5949	29.7647	19.3095	19.1535	10.0298	13.4285							7.239
IVGNm01282	AK012735,AK040559,AK088690,AK140938,NR_037569	mRNA			AK161145	AK132638,AK133596,AK136686,BC062275	AK136686	AK133223			5143		13455	18598	4	0.276	0	0.779	1		20		1	1				1810026B05Rik		2898.43	0.889	201.138				25.7976	9.05535	15.1789	6.33893	10.5579	8.07726	14.541	1.02324	0.017054	0.756822	NA	NA	NA	4.678
IVGNm01283	AK040659	ncRNA						AK198428	BC138842		709		12223	12932	4	0.055	0	5.642			1					uc009kgg.1		AK040659	RIKEN full-length enriched library, clone:A530008G01 product:unclassifiable, full insert sequence.,Mus musculus adult male aorta and vein cDNA	61.601	0.087																		5.948
IVGNm01284	AF173829,AK040720,AK089095,AK162641,BC054789,BC056999,NM_001122818,NM_015801	mRNA									4497	4047	24446	28884	34	0.154	0.438	7.651			1		1	1		uc009krr.1,uc009krs.1,uc009krt.1,uc009kru.1	NM_015801	Pnpla6	patatin-like phospholipase domain containing 6	3660.32	0.826	6684.58				62.2341	52.8928	68.1855	54.9067	63.4404	43.6511	45.9021							9.206
IVGNm01285	AK040808	ncRNA							AK139680		2279		25825	28104	1	0.081	0	0.439			6		1			uc009imz.1		AK040808	RIKEN full-length enriched library, clone:A530026I02 product:unclassifiable, full insert sequence.,Mus musculus adult male aorta and vein cDNA	292.84	0.128	-43.8636																	6.201
IVGNm01286	AK041042	ncRNA		AK177838		AK144911	AK144911		AK144911		1142		7408	8550	1	0.134	0	0.876								uc009jvm.1		AK041042	RIKEN full-length enriched library, clone:A530067O22 product:unclassifiable, full insert sequence.,Mus musculus adult male aorta and vein cDNA	503.687	0.441																		6.604
IVGNm01287	AK041074,AK136368	mRNA,ncRNA						AK015716	U30823		2803			2804		1	0		2		10									2005.39	0.715					182.415	149.522	154.001	107.022	89.7894	60.7029	64.1097	224.155	3.73591	0.954179	0.0570074	120.963	1525.72	9.155
IVGNm01288	AK041126	ncRNA				AY336094,NM_008746	NM_008746				1090			1090		1	0				7									272.991	0.25	-21.7489																	5.002
IVGNm01289	AK041187	ncRNA						AK030814			2531		1104	3635	1	0.696	0	0.395			6		1							302.209	0.119	-14.4969				376.109	405.322	338.543	374.67	337.694	288.838	221.533	2411.9	40.1984	0.913843	0.0354294	359.731	-512.654	5.343
IVGNm01290	AK041357	ncRNA		AK152342		BC156432	BC156432				2781		1569	4350	1	0.639	0	0.36			4									219.115	0.079	19.2977				302.14	219.06	243.097	202.537	227.421	225.201	221.494	1.09896	0.018316	0.860864	NA	NA	NA	6.182
IVGNm01291	AK041454	ncRNA						AK146773	AK029568		2141		1605	3746	3	0.572	0	1.401			3									267.92	0.125	-63.1565				6203.2	5608.49	4973.08	4571.68	3583.01	4345.48	4959.05	69.3556	1.15593	0.770895	0.457906	22.2282	-61.9153	6.407
IVGNm01292	AK041488,AK162946,NM_175648	mRNA									4303	2250	9267	13570	3	0.317	0.132	0.697			12	3				uc009iwe.1,uc009iwf.1	NM_175648	A530023O14Rik	RIKEN full-length enriched library, clone:F830203J01 product:weakly similar to Tripartite motif protein TRIM12.,Activated spleen cDNA,hypothetical protein LOC244183	230.862	0.061	152.405																	5.212
IVGNm01293	AK041721	mRNA		AK133981	AK021117						3091	348	108	3199	1	0.966	0.113	0.324	1		6					uc009ijq.1		Clns1a	RIKEN full-length enriched library, clone:A630032F01 product:hypothetical protein, full insert sequence.,3 days neonate thymus cDNA	127.736	0.041	-591.896																	5.879
IVGNm01294	AK041889,NR_001461.2	ncRNA						NM_008434			83437			83437		1	0		16		142							Kcnq1ot1		5711.74	0.068			Kcnq1ot1	Kcnq1ot1														5.4
IVGNm01295	AK042026,AK083572,AK148021,AY070216,BC056924,NM_173189	mRNA			AK143974						4619	2469	203397	208016	13	0.013	0.439	5.025	1		3		1	1		uc009kzt.1	NM_173189	Mcph1	primary autosomal recessive 1,microcephaly	863.551	0.273	456.021				241.844	286.547	169.507	86.9081	65.538	41.6959	36.0694	138.948	2.3158	0.940625	0.101654	71.514	2435.59	8.664
IVGNm01296	AK042244	mRNA									1859			1859		1	0				4				1					866.565	0.466	-28.8406																	4.896
IVGNm01297	AJ305343,AK020264,AK041101,AK042389,AK045774,AK046491,BC018248,BC038016,NM_030221	mRNA		NM_007856							2639	2178	24796	27256	20	0.077	0.586	9.992			1	1	1	2		uc009kqa.1,uc009kqb.1	NM_030221	Nadsyn1	Mus musculus domesticus partial mRNA for NH3-dependent NAD+ synthetase like protein.,NAD synthetase 1	1591.8	0.728	1949.13																	8.137
IVGNm01298	AK042390	ncRNA				AK051862,BC127083,NM_008855,X53532,X59274	X59274				1349			1349		1	0				1									82.95	0.061	-11.3529																	8.003
IVGNm01299	AK042451	ncRNA	TRUE								1518		367	1885	1	0.805	0	0.659			6			1						226.248	0.149	-21.2932																	12.149
IVGNm01300	AK042514	ncRNA		BC021444							766		365	1131	1	0.677	0	1.305								uc009kbw.1		AK042514	RIKEN full-length enriched library, clone:A630098M21 product:unclassifiable, full insert sequence.,Mus musculus 3 days neonate thymus cDNA	122.769	0.16	36.1177				622.164	621.199	532.363	521.235	426.137	340.218	308.284	353.377	5.88961	0.987253	0.0206315	237.688	688.47	8.993
IVGNm01301	AK042559,NR_001461.2	ncRNA						NM_008434			83437			83437		1	0		16		142							Kcnq1ot1		5711.74	0.068			Kcnq1ot1	Kcnq1ot1														6.62
IVGNm01302	AK042586	ncRNA	TRUE					AK082314			2454		12159	14613	4	0.168	0	1.63			6				4					415.661	0.169	-112.115																	5.342
IVGNm01303	AK042676	ncRNA				AK002454,AK049406,AK146858,AK150761,AK151388,AK151861,AK152524,AK167882,BC067063,NM_009982,U74683,U89269	AK146858				1590		3188	4778	1	0.333	0	0.629			2				2					100.175	0.063	-2.2705																	5.148
IVGNm01304	AK042788	ncRNA	TRUE								3604		32011	35615	2	0.101	0	0.555			9		1							241.497	0.067	2.9265																	5.929
IVGNm01305	AK042797,AK140693	ncRNA		AK186749				BC042662			2130		6540	8670	1	0.246	0	0.469	1		2		1	1		uc009fvo.1		AK042797	RIKEN full-length enriched library, clone:A730025I02 product:unclassifiable, full insert sequence.,Mus musculus 7 days neonate cerebellum cDNA	525.797	0.247	27.6721																	8.324
IVGNm01306	AK038438,AK043162,AK048029,AK082028	ncRNA	TRUE								3874		50204	51443	4	0.024	0	3.228	3		11		1	2						182.832	0.123	7.9297	TRUE																12.055
IVGNm01307	AK043289	mRNA		AK048002							1317		163828	165145	2	0.008	0	1.519			6		1							405.153	0.308	30.0355				26.498	21.0395	21.0467	19.7755	17.3362	12.9465	15.7796	206.726	3.44543	0.851559	0.116634	79.2157	-339.086	8.646
IVGNm01308	AK043303	ncRNA	TRUE								1442		8533	9975	1	0.145	0	0.693			1			1		uc009jim.1		AK043303	RIKEN full-length enriched library, clone:A730082K24 product:unclassifiable, full insert sequence.,Mus musculus 7 days neonate cerebellum cDNA	172.423	0.12					297.794	304.661	266.151	254.326	198.924	127.517	81.346	602.511	10.0419	0.99249	0.0119779	406.611	1162.68	7.441
IVGNm01309	AK043528	ncRNA							AK079950		1106		1154	2260	1	0.489	0	0.904					1	2						125.148	0.113	-10.6143																	8.886
IVGNm01310	AK020990,AK043775	ncRNA				AF388675,AK030221,AK039754,BC140302,BC146460,NM_011807	NM_011807				971			971		1	0				2									37.404	0.043	-89.9971																	6.831
IVGNm01311	AK043814	mRNA						NM_001033419			990	561	5355	6345	3	0.156	0.567	3.03			2	1				uc009fnl.1		AK043814	RIKEN full-length enriched library, clone:A830035N18 product:unclassifiable, full insert sequence.,Mus musculus 10 days neonate cortex cDNA	287.274	0.29	83.7136																	6.498
IVGNm01312	AK043969	mRNA									1149	528	5060	6209	2	0.185	0.46	1.741								uc009jnq.1		Hs3st2	Heparan sulfate glucosamine 3-O-sulfotransferase 2 (EC 2.8.2.29) (Heparan sulfate D-glucosaminyl 3-O-sulfotransferase 2) (Heparan sulfate 3-O-sulfotransferase 2).	361.473	0.315	387																	5.492
IVGNm01313	AK044046,AK083092,AK086711,AK139334,BC057581,NM_001039154,NM_007667,X95600	mRNA		AK042807							3808	2397	388835	391987	12	0.007	0.564	3.912	1	1	8	4	2	4		uc009mzm.1,uc009mzn.1,uc009mzo.1	NM_001039154,NM_007667	Cdh8	cadherin 8 isoform 1,cadherin 8 isoform 2	3377.11	0.972	3386.27
IVGNm01314	AK044154,AK045487,AK045535	mRNA	TRUE								1384		73401	74785	3	0.019	0	2.168			7			2		uc009hez.1		AK045535	RIKEN full-length enriched library, clone:B230206L05 product:unclassifiable, full insert sequence.,Mus musculus adult male corpora quadrigemina cDNA	120.853	0.087	178.479				132.777	100.009	123.038	103.035	97.3108	90.3297	89.5512							6.418
IVGNm01315	AK029913,AK044561,AK137205,BC055006,DQ631806	mRNA									5609	3456	15725	21334	23	0.193	0.384	6.036			2	1			1	uc009iao.1,uc009iap.1,uc009iaq.1		Man2a2	RIKEN full-length enriched library, alpha 2, clone:4931438M07 product:mannosidase 2, full insert sequence.,Man2a2 protein.,Mus musculus adult male testis cDNA,N-glycan processing alpha-mannosidase IIx.	3054.4	0.836	5062.63				27.8218	23.3596	38.3701	33.6241	33.0996	25.6764	33.7705							6.884
IVGNm01316	AK009793,AK044863	ncRNA	TRUE	NM_025948							3881			3881		1	0				9									575.653	0.24	-3.5155																	4.961
IVGNm01317	AK045069	ncRNA				AB079603,AK136389,AK154244,AY331142,BC045142,BC055304,NM_008434,U70068	NM_008434				1401			1402		1	0							1						60.625	0.043	12.319																	6.115
IVGNm01318	AK045353,NR_015351,U69888	ncRNA	TRUE								3991		58987	59721	5	0.012	0	6.812			10		1	2		uc009hem.1		Ipw,U69888	RIKEN full-length enriched library, clone:B230105C16 product:Mus musculus Ipw gene, exon B, full insert sequence.,Mus musculus adult male corpora quadrigemina cDNA	928.087	0.233	14.5004			Ipw	153.212	114.872	118.221	99.2666	94.0168	67.0835	76.4135	193.317	3.22196	0.865077	0.117167	76.9538	-377.482	7.637
IVGNm01319	AK045462	ncRNA	TRUE								2989			2989		1	0				11		1	1						86.895	0.029	-38.7137																	5.168
IVGNm01320	AK045483	ncRNA				AK084063,NM_001111016	AK084063				1743		101	1844	1	0.945	0	0.574			2		1	2		uc009hbe.1		AK045483	RIKEN full-length enriched library, clone:B230206G19 product:unclassifiable, full insert sequence.,Mus musculus adult male corpora quadrigemina cDNA	53.812	0.031	-39.7027																	11.625
IVGNm01321	AK042904,AK045665	ncRNA		AB000893							2245		4689	6934	1	0.324	0	0.445	1		1		1			uc009gpg.1		AK042904	RIKEN full-length enriched library, clone:A730037D09 product:unclassifiable, full insert sequence.,Mus musculus 7 days neonate cerebellum cDNA	215.494	0.096	28.4519																	5.625
IVGNm01322	AK045719,AK047813,BC098229,BC120501,BC144742,BC144743,DQ157764,DQ208935	mRNA									2349	996	8548	10656	6	0.114	0.202	4.708			3	1	1			uc009hcz.1,uc009hdc.1	NM_178706	Siglech	RIKEN full-length enriched library, clone:B230307G20 product:weakly similar to Myeloid cell surface antigen CD33 (gp67) (Siglec-3).,Adult male corpora quadrigemina cDNA,sialic acid binding Ig-like lectin H	352.914	0.159	79.2053																	6.654
IVGNm01323	AK045786	ncRNA	TRUE								568		3733	4301	2	0.132	0	3.521					2	1		uc009jkd.1		AK045786	RIKEN full-length enriched library, clone:B230311B06 product:unclassifiable, full insert sequence.,Mus musculus adult male corpora quadrigemina cDNA	76.36	0.134	-1.7006	TRUE																6.412
IVGNm01324	AK020867,AK046115	mRNA						AK009950	AK179005		2560		1603	3952	3	0.594	0	1.172			1		1			uc009flv.1		AK020867	RIKEN full-length enriched library, clone:A930016O22 product:hypothetical protein, full insert sequence.,Mus musculus adult retina cDNA	569.73	0.223	112.263
IVGNm01325	AK046136	mRNA									2856	2232	60858	63714	5	0.045	0.782	1.751			2	1	1	1		uc009nsa.1	NM_020605	Jph3	junctophilin 3	2016.95	0.706	3306.99																	7.138
IVGNm01326	AK046356	ncRNA		AK003201							2397			2397		1	0				5		1							941.568	0.393	-656.933																	5.326
IVGNm01327	AK046611,AK155376,AK165569,AK168334,AK168727,BC055900,BC085281,NM_009532,U02887	mRNA		BC145686							2519	1896	24619	27138	18	0.08	0.215	7.659					1	1		uc009fpx.1,uc009fpy.1,uc009fpz.1	NM_009532	Xrcc1	RIKEN full-length enriched library, clone:B430205I06 product:X-ray repair complementing defective repair in Chinese hamster cells 1, full insert sequence.,4 days neonate male adipose cDNA,X-ray repair complementing defective repair in	1577.81	0.72	2238.56				97.2507	84.1188	112.426	82.223	57.0778	30.1988	29.6207	486.089	8.10149	0.850146	0.0632465	159.248	-461.881	7.892
IVGNm01328	AK046787,AK135629	ncRNA				AK137126	AK137126				2554			2555		1	0		1		4		1	1						123.553	0.066	21.4182
IVGNm01329	AK047118	ncRNA						NM_001113414			2418		821	3239	1	0.747	0	0.414			1		1	1						620.151	0.256	37.1088																	6.132
IVGNm01330	AK035900,AK047141	ncRNA	TRUE								3085		9033	12033	5	0.173	0	2.112			5		1			uc009kuu.1		AK047141	RIKEN full-length enriched library, clone:9630015P16 product:unclassifiable, full insert sequence.,Mus musculus 16 days neonate cerebellum cDNA	74.523	0.032	-11.9328																	6.194
IVGNm01331	AK042625,AK042860,AK043192,AK047202	mRNA							AK042625		6358	4140	244991	251349	3	0.021	0.326	0.472	1		5		5	5		uc009gkk.1	NM_172385	Zfp536	zinc finger protein 536	4845.95	0.762	6504.52																	5.96
IVGNm01332	AK047546	ncRNA				AF324864,AK043753,AK045409,BC038375,NM_080853	AF324864				3896			3896		1	0		2		5				2					69.139	0.018	-5.9115																	5.046
IVGNm01333	AK039159,AK047741	mRNA		BC145661							2071	474	5521	7301	3	0.244	0.222	1.685			1	1	1	1		uc009mpb.1,uc009mpc.1		AK039159,AK047741	RIKEN full-length enriched library, clone:A230103J11 product:unclassifiable, full insert sequence.,Mus musculus adult male hypothalamus cDNA	789.611	0.406	-42.0515																	7.473
IVGNm01334	AK047831,NR_001461.1,NR_001461.2	ncRNA						NM_008434			83437			83437		1	0		16		142					uc009kpc.1		Kcnq1ot1,NR_001461	RIKEN full-length enriched library, clone:C130002M05 product:Mus musculus KvLQT1-AS allele (LIT1), full insert sequence.,Mus musculus 16 days embryo head cDNA	5711.74	0.083	70.1369		Kcnq1ot1	Kcnq1ot1														8.643
IVGNm01335	AK048019	mRNA						NM_009109			1764	507	7774	9538	3	0.185	0.287	1.701			2	1			1	uc009gaq.1		AK048019	RIKEN full-length enriched library, clone:C130030J05 product:unclassifiable, full insert sequence.,Mus musculus 16 days embryo head cDNA	432.231	0.245	-128.772				25.9741	21.7835	27.0051	20.8686	22.5815	12.7112	19.5065							6.177
IVGNm01336	AK048363	mRNA				AK158380	AK158380				2733			2733		1	0		1		6				9					306.176	0.112	51.7675																	5.829
IVGNm01337	AK048719	ncRNA		AK177754	NM_032610	BC042662	BC042662	AK135796			922		962	1884	1	0.489	0	1.085			1									367.279	0.398	-119.43																	5.922
IVGNm01338	AK048929	ncRNA				AK039070,AK083051,AK083107,AK147247,BC148598,BC153159,NM_001038701,NM_008071,U14420	AK083107				884			884		1	0				2				3					40.025	0.045	-102.161																	5.198
IVGNm01339	AK016482,AK049198,AK161312,BC053515,BC062139,NM_023764	mRNA									3705	825	17117	20822	5	0.177	0.167	1.356			4	1	1	1		uc009kmd.1	NM_023764	Tollip	toll interacting protein	865.816	0.235	1955.99				1973.99	1859.2	1531.14	1311.79	875.174	580.304	354.657	306.205	5.10342	0.997569	0.00994108	254.489	384.302	8.003
IVGNm01340	AK049623	ncRNA				AF388675,AK030221,AK039754,BC140302,BC146460,NM_011807	NM_011807				2323			2323		1	0		1		5				5					302.733	0.13	10.222																	14.053
IVGNm01341	AK049871	ncRNA							AK012322		1893		63449	65342	3	0.029	0	1.585			8		1	1		uc009hnh.1		AK049871	RIKEN full-length enriched library, clone:C630005I06 product:unclassifiable, full insert sequence.,Mus musculus adult male hippocampus cDNA	555.473	0.293	-44.8614				25.7436	22.4023	23.8406	13.3446	10.0034	8.29382	9.02665							10.285
IVGNm01342	AK049950,NR_033504	mRNA		AK046483							1417	324	21253	22670	2	0.063	0.229	1.411			5		2	3				Gm9962		115.409	0.081	-24.2818																	5.132
IVGNm01343	AK050038,AK160287,NM_029332	mRNA							NM_029332		12543	8328	286533	299076	36	0.042	0	2.87			7	1	1	3				Akap13		4858.35	0.387	2710.07				656.362	569.206	312.064	140.062	84.9224	65.1992	40.5398	94.5042	1.57507	0.996172	0.0371131	76.5745	123.397	8.917
IVGNm01344	AK050132,AK050219,AK050288,AK050404,AK050458,AK149591,BC095985,NM_178758	mRNA									2885	1773	14605	17490	14	0.141	0.409	5.613			5	2	1	3		uc009jlf.1,uc009jlg.1	NM_178758	C730027J19Rik	RIKEN full-length enriched library, clone:A530006H13 product:hypothetical protein, full insert sequence.,Mus musculus adult male aorta and vein cDNA,hypothetical protein LOC272428	1513.68	0.586	1990.27																	6.426
IVGNm01345	AK050164	ncRNA									1646		62153	63799	8	0.026	0	4.86					1			uc009nyy.1		AK050164	RIKEN full-length enriched library, clone:C730024A12 product:unclassifiable, full insert sequence.,Mus musculus adult male liver tumor cDNA	186.195	0.113	-51.8492				58.7007	49.4526	52.2858	38.6229	39.931	23.485	36.0886	199.578	3.32631	0.794587	0.146574	67.587	-209.44	11.108
IVGNm01347	AK013944,AK050570,AK145977,AK146378,AK151750,AK152689,BC003233,BC023244,BC082274,NM_016849,U75839,U75840	mRNA		AK013411	BC079873			BC039807		AK013411,AK013944,AK017362,AK145977,AK146378,AK151750,AK152689,BC003233,BC023244,BC050882,BC082274,EU545481,NM_016849,NM_029410,U75839,U75840	2161	1266	3278	5189	7	0.304	0.424	4.528					1	1		uc009gsm.1,uc009gsn.1	NM_016849	Irf3	interferon regulatory factor 3	655.676	0.391	1119.6																	9.957
IVGNm01348	AK031634,AK050574,DQ717888	mRNA		AK147127							2959			2959		1	0		1		5				8	uc009jee.1		DQ717888	RIKEN full-length enriched library, clone:4930431P19 product:hypothetical protein, full insert sequence.,Mus musculus adult male testis cDNA	346.486	0.117	41.4652
IVGNm01349	AK031634,AK050574,DQ717888	mRNA		AK147127							2959			2959		1	0		1		5				8	uc009jee.1		DQ717888	RIKEN full-length enriched library, clone:4930431P19 product:hypothetical protein, full insert sequence.,Mus musculus adult male testis cDNA	346.486	0.117	41.4652																	6.234
IVGNm01350	AK050685	mRNA						AK007224			2732		170	2902	1	0.941	0	0.366												457.979	0.168	61.8136				229.597	237.142	210.275	210.739	169.015	97.6261	50.2234	845.746	14.0958	0.982602	0.0168182	433.81	16773.6	8.355
IVGNm01351	AK050715	ncRNA	TRUE								2088		20425	22513	3	0.093	0	1.437			2									225.839	0.108	43.5602				26.6881	20.1717	25.6042	16.4712	17.8783	11.0531	12.4673	302.417	5.04028	0.773723	0.109946	93.9264	-247.94	5.675
IVGNm01352	AK051041,AK087567,NM_007562	mRNA		AK080712					AF025301		4663	2970	20975	25638	4	0.181	0.637	0.861	1		10		1	1		uc009icu.1	NM_007562	Bnc1	basonuclin 1	2243.58	0.483	1770.43																	4.918
IVGNm01353	AK051224	ncRNA				AF324864,AK043753,AK045409,BC038375,NM_080853	AF324864				1472			1472		1	0				4			1						40.708	0.028																		13.935
IVGNm01354	AK051340	ncRNA				AK039070,AK083051,AK083107,AK147247,BC148598,BC153159,NM_001038701,NM_008071,U14420	AK083107				2237			2237		1	0		1		6									141.105	0.063	-27.4909																	8.369
IVGNm01355	AK051564,AK082479,AK171095,BC004764,NM_019966	mRNA									2933	1479	14097	16197	4	0.127	0.275	1.946					1			uc009npn.1	NM_019966	Mlycd	malonyl-CoA decarboxylase	1023.03	0.483	3361.31				261.948	271.958	164.649	70.6706	41.4559	25.5003	27.8304	123.046	2.05076	0.974727	0.0734608	76.7386	310.284	9.764
IVGNm01356	AK051604,NR_001461.2	ncRNA						NM_008434			83437			83437		1	0		16		142							Kcnq1ot1		5711.74	0.096	-36.211		Kcnq1ot1	Kcnq1ot1														8.893
IVGNm01357	AK051648	ncRNA						AF324864			929			929		1	0		1											68.208	0.073	-103.5																	5.41
IVGNm01358	AB050742,AB057754,AB057755,AB057756,AB057760,AB057761,AB057762,AK027924,AK051653,AK173212,BC060665,BC138714,BC145398,NM_001040085,NM_001040086,NM_001040087,NM_001040088,NM_031394	mRNA									4823	3840	58023	61741	18	0.052	0.36	6.855			4	1	1			uc009iha.1,uc009ihb.1,uc009ihc.1,uc009ihe.1,uc009ihf.1,uc009ihg.1,uc009ihh.1,uc009ihi.1,uc009ihj.1	NM_001040085,NM_001040086,NM_001040087,NM_001040088,NM_031394	Sytl2	synaptotagmin-like 2 isoform 1,synaptotagmin-like 2 isoform 2,synaptotagmin-like 2 isoform 3,synaptotagmin-like 2 isoform 4,synaptotagmin-like 2 isoform 5	2431.89	0.965	1226.58																	8.558
IVGNm01359	AK051824,AK170314,AY648976	mRNA									2320	1935	189144	191464	12	0.01	0.389	5.172			1		1	1		uc009ljp.1,uc009ljr.1,uc009ljt.1		Nrg1	RIKEN full-length enriched library, clone:D230005F13 product:neuregulin 1, clone:F630045N09 product:neuregulin 1, full insert sequence.,Mus musculus 12 days embryo eyeball cDNA,NOD-derived CD11c +ve dendritic cells cDNA,Neuregulin-1 type I beta1-a.	1832.27	0.79	2181.35																	6.95
IVGNm01360	AK019505,AK051992,AK084084,AK084903,AK145781	mRNA		AK142206							3811	272	735	3811	1	0.807	0	0.326			9									297.821	0.078	-34.1155	TRUE			34.63	21.1731	19.2312	14.0823	14.2357	5.61979	11.6835	71.9646	1.19941	0.843312	0.347363	26.9647	-107.596	9.256
IVGNm01361	AK052149	ncRNA				AB079603,AK136389,AK154244,AY331142,BC045142,BC055304,NM_008434,U70068	NM_008434	NR_001461.1			3920			3920		1	0				4			1						426.993	0.109	42.1757																	4.625
IVGNm01362	AK052215,AK137415	mRNA						AK208491	AK036368		2998	1419	22697	25695	11	0.117	0	3.669												1317.55	0.439	1065.55																	4.868
IVGNm01363	AK052509,NM_001164661,NM_001164662	mRNA			AK076051,AK187167				NM_001164661		6524	3759	84098	90563	31	0.071	0	4.752	1		12	1	1	1				Cyfip1		4027.78	0.622	5806.54
IVGNm01364	AF072697,AK028811,AK052509,AK128952,AK146613,AK152558,AK157773,AK167068,AK170572,AK195390,AK201561,AK220320,BC002174,BC047135,BC052713,BC054429,BC086625,NM_001164661,NM_001164662,NM_011370	mRNA		AK053186,AK054536	AK076051,AK187167,BC011415				NM_001164661		6524	3759	84098	90563	31	0.046	0	7.434	1		12	3	2	2		uc009hdl.1,uc009hdm.1,uc009hdn.1,uc009hdo.1	NM_011370	Cyfip1,Shyc	complete cds.,Mus musculus SHYC (Shyc) mRNA,cytoplasmic FMR1 interacting protein 1	4027.78	0.903	5806.54				300.207	307.125	250.818	212.907	155.016	88.3633	58.5047	357.066	5.95109	0.995321	0.0123616	275.797	506.238	11.703
IVGNm01365	AK052566,AK134821,AK169083,NM_001141950	mRNA		NR_027769				AK208491			1799	369	7227	9026	5	0.195	0	2.849	1		1	1	1	2				Tmem80		311.028	0.173	414.622				305.927	301.008	306.498	290.994	301.543	302.33	346.716							4.794
IVGNm01366	AJ001038,AK052683,AK142174,BC115722,BC115834,NM_008664	mRNA									5075	4389	70814	75889	36	0.064	0.165	7.412			5		1	7	2	uc009kzm.1,uc009kzn.1	NM_008664	Myom2	Mus musculus mRNA for M-protein.,myomesin 2	2784.45	0.573	5659.32																	7.729
IVGNm01367	AK053064	ncRNA				AB106878,AF308145,AK005217,AK038952,AK051290,BC051124,NM_175140	AK051290				3179			3179		1	0		1		1									698.238	0.22	49.6631																	5.851
IVGNm01368	AK053268	ncRNA		AK013663							3664			3664		1	0				5									456.799	0.125	23.1089																	6.8
IVGNm01369	AK034290,AK053329	ncRNA							BC052432		2879			2879		1	0				5		1	2						275.785	0.097	29.0289				41.0711	26.0869	21.4116	10.2183	10.8595	4.84412	9.62149	73.8121	1.2302	0.934762	0.20695	36.5447	-3732.42	5.365
IVGNm01370	AK053370,AK220353,NM_001193305	mRNA									5326	3306	124460	128140	25	0.029	0.298	6.793			4	2				uc009jgo.1,uc009jgp.1	NM_177282	Mical2	flavoprotein oxidoreductase MICAL2	2886.11	0.842	3615.41				38.2132	30.4739	38.5479	29.219	30.8158	21.7883	27.2558
IVGNm01371	AK053830,BC028668,BC078445,BC152824,BC156585,NM_001081292	mRNA		AK163543	AK013779			BC042662			3684	2826	14538	18222	9	0.157	0.529	3.323			2	2	1			uc009fwv.1,uc009fww.1	NM_001081292	Map3k10	mitogen activated protein kinase kinase kinase	3147.84	0.902	2898.24				490.483	572.694	531.902	496.709	383.886	243.775	169.384	786.988	13.1165	0.9421	0.0316101	295.776	-1191.03	10.32
IVGNm01372	AK053947	mRNA		AK077664							2066			2066		1	0				3									290.42	0.141	32.2615
IVGNm01373	AF111998,AF111999,AK035298,AK054060,AK134116,AK142687,AK165245,BC012697,BC012967,NM_011671,U69135,U94593	mRNA			AF419292						3961	927	5177	8816	8	0.229	0.234	5.014			1	1		1		uc009inb.1	NM_011671	Ucp2	proton,uncoupling protein 2 (mitochondrial	1310.45	0.864	2285.62				450.895	529.677	564.404	610.242	593.416	454.821	205.893							13.278
IVGNm01374	AK037811,AK054221,AK155734	ncRNA		AK154666				AK142511		AK142511,AK154666,AY165628,BC111108,BC138819,BC138820,BC152357,BC152358,NM_175649	1055		41486	42541	2	0.025	0	2.217					1	1		uc009kpq.1,uc009kpr.1		AK054221,AK155734	RIKEN full-length enriched library, clone:E230032D23 product:unclassifiable, full insert sequence.,Mus musculus 2 days pregnant adult female oviduct cDNA	81.377	0.128	8.4665
IVGNm01375	AK041962,AK054486	mRNA									1375	1176	27527	28892	9	0.047	0.731	6.657			1		2	2						411.594	0.302	347.531				190.443	181.743	206.077	182.417	174.991	129.808	106.664	1856.18	30.9363	0.904128	0.0378255	326.376	-503.406	12.254
IVGNm01376	AK054509,NR_001461.2	ncRNA						NM_008434			83437			83437		1	0		16		142		1					Kcnq1ot1		5711.74	0.226	-61.7064		Kcnq1ot1	Kcnq1ot1	42.3499	33.9057	26.0444	12.3122	13.7122	7.87145	10.8752	95.8479	1.59747	0.967569	0.107983	56.6826	310.145	14.312
IVGNm01377	AK076142,AK081673,AK085104,AK173319,BC062943,NM_175388	mRNA									7156	2082	53048	60204	5	0.119	0.237	0.699			6			1		uc009img.1		2900057K09Rik,Rnf169	MKIAA1991 protein (Fragment).	2498.27	0.349	827.509				274.869	213.853	113.833	78.2548	78.5399	64.0972	59.6847	57.2079	0.953464	0.995592	0.0695339	45.2035	77.8933	5.892
IVGNm01378	AK076338	ncRNA	TRUE								3001		32752	35757	2	0.084	0	0.666	4		1			2						207.001	0.069	-45.9909																	5.314
IVGNm01379	AK076358	ncRNA		AK006741							2599		681	3280	1	0.792	0	0.385			1					uc009fxk.1		AK076358	RIKEN full-length enriched library, clone:4732462M03 product:unclassifiable, full insert sequence.,Mus musculus 10 days neonate skin cDNA	152.055	0.059																		9.077
IVGNm01380	AK076372,AK161422,NR_015569	ncRNA		BC053502				X53654	AK078204		2428		169117	171004	6	0.011	0	3.18			3		1	1		uc009fso.1		4732471J01Rik,AK076372	RIKEN full-length enriched library, clone:A830014N15 product:unclassifiable, full insert sequence.,Mus musculus 10 days neonate cortex cDNA	142.916	0.059	49.3026				26.0596	22.3448	25.898	21.0466	22.6067	22.0222	20.7481							8.157
IVGNm01381	AK076452	ncRNA							EF143326		716		1764	2480	1	0.289	0	1.397						3						90.844	0.127	-85.7551																	5.753
IVGNm01382	AK005764,AK076548,BC050962,BC061058,BC147560,NM_001168369,NM_029292	mRNA									1538	1143	115551	116599	14	0.009	0.35	11.74			5	3	1			uc009oaa.1,uc009oab.1,uc009oac.1	NM_029292	1700008F21Rik	RIKEN full-length enriched library, clone:1700008F21 product:RIKEN cDNA 1700008F21 gene, full insert sequence.,Mus musculus adult male testis cDNA,hypothetical protein LOC75453	308.044	0.235	-69.1031																	5.914
IVGNm01383	AK076548,BC147560	mRNA									1498	549	114970	116468	14	0.013	0.35	9.434			5	3				uc009oaa.1		1700008F21Rik	RIKEN full-length enriched library, clone:1700008F21 product:RIKEN cDNA 1700008F21 gene, full insert sequence.,Mus musculus adult male testis cDNA	233.424	0.156	-78.763
IVGNm01384	AK076802	mRNA			AK033287			AK011807			903	345	23243	24146	5	0.037	0.382	5.537			1	1								320.361	0.355	-13.8034				1083.45	1246.74	946.348	942.058	811.18	592.939	547.35	372.941	6.21568	0.921104	0.0512608	163.84	-1349.99	7.044
IVGNm01385	AK076849	ncRNA		NM_175366							713		13869	14582	2	0.049	0	2.805			1					uc009idi.1		AK076849	RIKEN full-length enriched library, clone:4930508C19 product:unclassifiable, full insert sequence.,Mus musculus adult male testis cDNA	187.663	0.263																		6.348
IVGNm01386	AK076952,BC050982,BC100529,NR_033461	ncRNA	TRUE	AK162109							567		10605	11172	4	0.051	0	7.055						1		uc009gzv.1,uc009gzw.1		AK076952,BC050982,Gm9999	RIKEN full-length enriched library, clone:4930571K11 product:hypothetical protein, full insert sequence.,Mus musculus adult male testis cDNA	382.453	0.816	40.8531																	6.604
IVGNm01387	AK077166	ncRNA		AK146578					AK044128		1573		72137	73710	7	0.021	0	4.45			3		1			uc009mqw.1		AK077166	RIKEN full-length enriched library, clone:4933416K23 product:unclassifiable, full insert sequence.,Mus musculus adult male testis cDNA	206.722	0.131	21.068																	5.268
IVGNm01388	AK077300,BC009165,NM_009381	mRNA									1038	472	3516	4554	1	0.192	0.304	1.2								uc009ije.1	NM_009381	Thrsp	thyroid hormone-responsive protein	329.2	0.317	675.822				25.3303	20.782	22.9668	11.9489	12.3223	5.0333	7.10912	233.63	3.89383	0.895781	0.0856123	100.043	-696.791	5.749
IVGNm01389	AK020218,AK054473,AK077348,AK079363,AK132677,BC010496,NM_009383	mRNA							AK054473		4301	1176	17496	21737	12	0.195	0.062	2.79	1		3	1	1			uc009jyy.1,uc009jyz.1,uc009jza.1	NM_009383	Tial1	Tial1 cytotoxic granule-associated RNA binding	3293.17	0.766	1206.41				214.628	233.147	179.73	135.683	99.2972	65.8181	52.8608	245.787	4.09645	0.980528	0.0338737	157.979	553.349	7.704
IVGNm01390	AK077918,BC116270,BC116271,NM_177893	mRNA									3475	3060	23863	27338	13	0.127	0.446	3.741			5	1			1	uc009hgf.1		6030441H18Rik,Fan1	RIKEN full-length enriched library, clone:6030441H18 product:hypothetical Cytochrome c family heme-binding site containing protein, full insert sequence.,13 days embryo male testis cDNA	1320.17	0.38	3169.01																	6.819
IVGNm01391	AK077985	ncRNA				AK122368,AK140322,AK141949,AK156841,AK157054,AK165341,BC016532,BC060647,NM_001146010,NM_199012	AK141949				4040		51	4091	1	0.988	0	0.248	3		7			2						510.777	0.126	-6.7376
IVGNm01392	AK005372,AK078019,AK136689,NM_025898	mRNA									2332	888	17001	19333	10	0.119	0	4.34			1		1	3		uc009fgw.1	NM_025898	Napa	N-ethylmaleimide sensitive fusion protein	1095.84	0.473	1578.7				1894.45	1974.47	1669.12	1437.25	1365.89	1085.91	907.782	338.576	5.64293	0.968193	0.0339045	191.681	1449.05	13.475
IVGNm01393	AK078239	ncRNA						AK198428	BC138842		2330		26208	28538	4	0.082	0	1.717			1									241.179	0.104	19.1183																	5.396
IVGNm01394	AK078296	ncRNA						BC048183	NM_001039534		2426			2428		1	0				5		2	2						788.938	0.325	2.656																	9.95
IVGNm01395	AK078414	ncRNA			AK180445	AK135424,AK155515,AK212972,BC031433,NM_001077264,NM_007458,X14971	BC031433	BC156432			1626			1626		1	0				2		1	4						197.691	0.122																		6.459
IVGNm01396	AK078620	ncRNA				AF225980,AF325348,AK157809,AY574266,AY851289,BC172636,L37663,NM_007390	AF225980				2127			2127		1	0				1		1							122.963	0.058	10.3637																	5.191
IVGNm01397	AK046127,AK079065	mRNA							NM_001037906		4107	1107	641538	645647	14	0.006	0	3.409	1		13	4		1						2117.9	0.516	1671.44																	5.372
IVGNm01398	AK079261	mRNA									3007			3007		1	0				7		1	1						545.609	0.181	-199.53				223.821	186.815	200.244	164.962	124.995	78.2638	57.4999	443.843	7.39739	0.968863	0.0282964	241.424	2747.25	7.339
IVGNm01399	AB232600,AK009259,AK010862,AK076048,AK079306,AK080740,AK147178,AK165690,AY974570,BC019990,NM_023126,S53270	mRNA		AK076903							4403	744	18706	22571	8	0.031	0.141	11.905			3	1	1	1		uc009mfj.1,uc009mfk.1	NM_023126	Rab8A,Rab8a	complete cds.,Mus musculus mRNA for Rab8A,cell line NK14 derived transforming oncogene	1231.28	1.007	867.038				1087.84	1031.68	967.943	670.917	311.939	110.302	74.0321	289.153	4.81922	0.981269	0.0290837	185.186	659.297	11.181
IVGNm01400	AK032116,AK079387,AK147334,AK147595,AK167903,AK220570,BC031142,BC031144,NM_178633	mRNA									5020	1809	152032	155265	14	0.019	0.55	4.693			7	2	1	1		uc009luz.1,uc009lva.1	NM_178633	Klhl2	Mayven,kelch-like 2	2910.18	0.93	2376.4				435.476	355.151	300.567	213.925	140.752	113.73	113.309	150.189	2.50315	0.989505	0.0386526	108.24	245.226	5.489
IVGNm01401	AB094480,AK007494,AK042452,AK044731,AK079410,AK163708,BC028662,NM_026928	mRNA									3613	459	8422	12035	6	0.219	0.111	7.788			3		1			uc009kgu.1,uc009kgv.1,uc009kgw.1	NM_026928	1810014F10Rik,LE51	RIKEN full-length enriched library, clone:9830140K13 product:weakly similar to FUCOSE OPERON FUCU PROTEIN., complete cds.,Adult male bone cDNA,Mus musculus LE51 mRNA for hypothetical protein,hypothetical protein LOC69064	365.827	0.43	632.556				1041.08	1110.86	975.761	922.199	699.384	454.484	252.792	674.387	11.2398	0.988019	0.0146166	406.732	1972.26	10.521
IVGNm01402	AK080247	ncRNA						AK132915	NM_009943		309		771	1080	1	0.286	0	3.236								uc009jyg.1		AK080247	RIKEN full-length enriched library, clone:A530089E10 product:unclassifiable, full insert sequence.,Mus musculus adult male aorta and vein cDNA	16.538	0.054					1848.17	2395.8	1727.29	1828.81	2152.78	1705.71	2598.85							8.641
IVGNm01404	AK080501	ncRNA							U89413		1190			1191		1	0				6		1	1						769.437	0.647																		5.569
IVGNm01405	AK036297,AK038438,AK039637,AK080655,AK083195,NR_015599	ncRNA	TRUE								1889		51058	52220	5	0.022	0	4.303			7		1	2		uc009hfb.1,uc009hfc.1		A330076H08Rik,AK080655,AK083195	RIKEN full-length enriched library, clone:9630016B09 product:unclassifiable, full insert sequence.,Mus musculus 16 days neonate cerebellum cDNA	263.823	0.14	7.3581	TRUE																7.437
IVGNm01406	AK045719,AK047813,AK080658,AK139362,BC098229,BC120501,BC144741,BC144742,BC144743,DQ157764,DQ208935	mRNA									2349	996	8548	10656	6	0.084	0.202	5.631			3	1	1			uc009hcy.1,uc009hcz.1,uc009hda.1,uc009hdc.1	NM_178706	Siglech	RIKEN full-length enriched library, clone:6430529G09 product:hypothetical protein, clone:B230307G20 product:weakly similar to Myeloid cell surface antigen CD33 (gp67) (Siglec-3)., full insert sequence.,Adult male corpora quadrigemina cDNA,Mus musculus adult male olfactory brain cDNA,sialic acid binding Ig-like lectin H	352.914	0.159	165.294																	6.17
IVGNm01407	AK002630,AK004886,AK007976,AK045087,AK080831,AK140710,AK160981,AK164088,AK170717,BC072554,NM_001163662	mRNA						AK161165			2639	2438	15096	17735	12	0.075	0.522	9.868			2		1	4		uc009gvn.1,uc009gvo.1	NM_008749	Nucb1	RIKEN full-length enriched library, clone:0610014B14 product:nucleobindin, full insert sequence.,Mus musculus adult male kidney cDNA,nucleobindin 1	1363.23	0.866	2067.2				32.3164	29.2528	39.3959	30.2629	39.0265	31.1826	47.001							13.997
IVGNm01408	AK035508,AK035645,AK078094,AK080843,BC070450,NR_015456	ncRNA							AF101042		6764		31528	38292	11	0.177	0	1.626	7		30		1			uc009heo.1,uc009hep.1		AK035645,BC070450,D7Ertd715e	Chr 7, ERATO Doi 715, RIKEN full-length enriched library, clone:9530058B15 product:DNA segment, expressed, full insert sequence.,Mus musculus adult male urinary bladder cDNA	511.96	0.076	-5.2854	TRUE	linc1385															7.034
IVGNm01409	AK081131	ncRNA		BC115621		AK144911	AK144911		AK081765		1597			1598		1	0				2			1						186.429	0.117																		5.294
IVGNm01410	AK081410,AK220542,BC064016,BC067018,NM_001113414,NM_001113415,NM_010096,U92702,U92704	mRNA						M64837	NM_001113414		5023	1788	115887	120775	15	0.024	0.578	5.245			12	4	1	1		uc009ker.1,uc009kes.1	NM_010096	Ebf3	early B-cell factor 3	4085.48	0.934	1116.72				70.9716	45.6945	47.3199	21.6342	14.3913	5.94947	13.1753	131.933	2.19888	0.91981	0.125689	62.6154	-1232.6	5.253
IVGNm01411	AK081457	ncRNA				AK032853,AK146154,AK146675,BC085127,NM_001081267	NM_001081267				3320		24	3346	1	0.993	0	0.301			9			1						194.104	0.058	7.8075																	6.083
IVGNm01412	AK081705,AK081706	ncRNA	TRUE					AK084119			2545			2545		1	0				4									253.686	0.1	17.7159																	5.557
IVGNm01413	AK082077	mRNA									1316			1316		1	0				2									33.688	0.026	9.0401																	7.018
IVGNm01415	AK082314	ncRNA	TRUE								1155		438990	440145	5	0.003	0	4.329			1		1	1		uc009kuc.1		AK082314	RIKEN full-length enriched library, clone:C230037A09 product:unclassifiable, full insert sequence.,Mus musculus 0 day neonate cerebellum cDNA	267.051	0.231	25.1515																	7.936
IVGNm01416	AK082332	mRNA		NM_153591							2632		1271	3903	1	0.674	0	0.38			2									458.515	0.174	-25.2121																	5.997
IVGNm01417	AK082411	ncRNA	TRUE								3717		8574	12291	1	0.302	0	0.269	1		15									126.955	0.034	-31.9382	TRUE
IVGNm01418	AK082712	ncRNA	TRUE								4287		284	4576	1	0.938	0	0.233			11									468.451	0.109	-37.2554																	7.207
IVGNm01419	AK082843	ncRNA	TRUE								603		9139	9742	2	0.062	0	3.317					1		8					49.733	0.082	12.6993				144.789	145.083	127.217	106.17	90.2087	61.4547	56.3895	317.654	5.29424	0.992681	0.0168218	234.132	493.811	6.226
IVGNm01420	AK011453,AK082977,AK135168,AK149828,AK152222,AK161544,AK172214,BC030837,NM_033370	mRNA					BC030837				3342	2859	35807	39150	21	0.074	0	7.175			7	2	1	1		uc009jhx.1	NM_033370	Copb1	subunit beta 1,coatomer protein complex	3235.8	0.971	2415.61				983.718	1109.96	872.187	918.521	850.725	770.656	1017.3							10.82
IVGNm01421	AK083608,AK172963,BC009156,BC034512,BC091746,NM_133962	mRNA			BC024096				AK147923		5306	3063	58293	63593	19	0.083	0	3.585	2		4		1			uc009krj.1,uc009krk.1	NM_133962	Arhgef18	MKIAA0521 protein (Fragment).,rho/rac guanine nucleotide exchange factor (GEF)	1986.09	0.375	5262.19				716.347	726.835	537.139	345.227	180.622	102.249	81.0057	191.382	3.1897	0.990989	0.0285496	140.231	301.278	8.747
IVGNm01422	AK051677,AK054462,AK083719,AK166282,BC026424,BC055022,BC089575,NM_028243	mRNA							AK051677		2542	1473	56638	59180	9	0.038	0	3.636			3	1	1	1		uc009iik.1	NM_028243	Prcp	angiotensinase C like	1481.35	0.602	850.969				34.8441	27.7001	38.331	30.6884	34.9513	19.1441	19.8942							5.501
IVGNm01423	AF034580,AK009230,AK083845,BC055941,NM_001168218,NM_001168219,NM_001168220,NM_023197	mRNA		AK132322,NM_001081446	BC007154,BC025808						4900	1590	8950	13781	5	0.123	0.201	3.314	1		2		1	1		uc009jkq.1,uc009jkr.1,uc009jks.1	NM_023197	2310008H09Rik,Tsg118	RIKEN full-length enriched library, clone:2310008H09 product:weakly similar to TSG118.1., complete cds.,Adult male tongue cDNA,Mus musculus TSG118.1 (Tsg118) mRNA,hypothetical protein LOC66356	656.298	0.327	472.526				2301.8	2501.5	1901.31	1218.05	519.289	255.898	198.864	216.071	3.60118	0.977599	0.0406649	136.186	522.644	9.817
IVGNm01424	AK083876	mRNA				AK156219,BC085180,NM_011981	BC085180			D45210	1942			1945		1	0				6				2					113.509	0.058	10.7591																	4.977
IVGNm01425	AK084366	mRNA		NM_030691							3043	222		3043		1	0.073				3		1							1286.19	0.423	528.656																	9.291
IVGNm01426	AK084432	ncRNA									1493		72336	73829	2	0.02	0	1.34			2		1			uc009luj.1		AK084432	RIKEN full-length enriched library, clone:4930512H18 product:RIKEN cDNA 4930512H18 gene, full insert sequence.,Mus musculus adult male testis cDNA	135.968	0.091	19.8362																	5.896
IVGNm01427	AK084558	ncRNA	TRUE								2167		14416	16583	1	0.131	0	0.461			5			1						130.42	0.06	-26.4891																	5.008
IVGNm01428	AK084607,NM_001168218,NM_001168219,NM_001168220	mRNA		AK132322,NM_001081446	BC025808				AK006113		4900	1110	8950	13781	4	0.351	0	0.842	1		2		1	1				2310008H09Rik		656.298	0.134	441.623				3300.15	2778.53	1504.92	875.664	675.433	666.774	595.648	75.183	1.25305	0.997903	0.0351803	63.8998	91.3053	9.458
IVGNm01429	AK011486,BC053445,NM_001004187,NM_028129	mRNA		AK137621							2011	1437	52972	54812	13	0.033	0.664	6.73			2		1			uc009jlw.1,uc009jlx.1	NM_001004187,NM_028129	2610020H08Rik	exonuclease NEF-sp isoform 1,exonuclease NEF-sp isoform 2	1238.72	0.624	426.233				44.4143	39.0583	52.7011	39.5978	40.8786	28.5306	39.0231							7.383
IVGNm01430	AK084672	ncRNA						M36323			2474		93499	95973	5	0.026	0	2.021	1		7		1							359.408	0.145	-11.2119																	7.036
IVGNm01431	AK084717	mRNA							BC020531		1271			1271		1	0		1					1						250.201	0.197	-182.072																	6.31
IVGNm01432	AK084717,AK146506,BC020531,BC030339,NM_145584	mRNA							BC020531		4010	2421	271212	275222	15	0.014	0	3.776	1		2			1	5	uc009jhv.1	NM_145584	Spon1	(f-spondin) extracellular matrix,spondin 1	2705.61	0.678	2113.3
IVGNm01433	AK084816	ncRNA						NM_008434			3492			3492		1	0				6									206.333	0.059	17.1054																	5.982
IVGNm01434	AK084972	ncRNA				AK008476,BC038323,BC051506,BC096622,BC116375,NM_028095	BC096622				2521			2526		1	0		1		13									201.791	0.08	-20.9423																	4.863
IVGNm01435	AK084973	mRNA									2775			2777		1	0				1		1	1						306.94	0.111	-16.097																	9.034
IVGNm01436	AK084973,AK131157	mRNA									5942	4515		5946		1	0.76				3		1	1						919.525	0.155	2053.25
IVGNm01437	AK031949,AK085084,NM_023403	mRNA							AK076773		4235	672	5041	9276	2	0.457	0	0.472			3				7	uc009idx.1	NM_023403	Mesdc2	mesoderm development candidate 2	642.069	0.184	1010.07																	5.703
IVGNm01438	AK085155	ncRNA	TRUE								2626		8746	11372	3	0.231	0	1.142			2			1						181.699	0.069	-58.3722																	5.85
IVGNm01439	AK085431	ncRNA				AF099016,AF099019,AF099020,AK007792,BC003431,BC026419,NM_001082548,NM_011464	NM_001082548				2778			2779		1	0				5									234.708	0.084																		6.527
IVGNm01440	AK085462	ncRNA							BC059897		2683			2683		1	0				6									251.408	0.094	33.7624				124.233	97.5033	119.836	97.8868	92.1256	59.55	35.564	1105.47	18.4246	0.911212	0.0377283	292.115	-619.529	6.373
IVGNm01441	AK085632	mRNA						AK030814			1369		2247	3616	2	0.379	0	1.461	1		2		1	1		uc009ila.1		AK085632	RIKEN full-length enriched library, clone:D630049F14 product:unclassifiable, full insert sequence.,Mus musculus 0 day neonate kidney cDNA	106.16	0.078	59.0415																	9.025
IVGNm01442	AK085722,BC144932,BC144933,BC144936	ncRNA									3843		4561	8404	3	0.183	0	3.018			3									125.045	0.033	40.9112				128.556	123.368	116.529	98.9181	86.611	61.9642	70.2845	269.179	4.48632	0.969874	0.0392865	157.785	915.536	8.066
IVGNm01443	AK085792	ncRNA									688		10719	11407	3	0.06	0	4.36			2		1	1		uc009nqc.1		AK085792	RIKEN full-length enriched library, clone:D830009O14 product:unclassifiable, full insert sequence.,Mus musculus 16 days neonate heart cDNA	19.87	0.029	-27.0699																	6.76
IVGNm01444	AK085986	ncRNA		AK009769		AF220140,AF220141	AF220140	BC062252			832		8976	9808	6	0.085	0	7.212			1		2	1		uc009iwa.1		AK085986	RIKEN full-length enriched library, clone:D830038I23 product:unclassifiable, full insert sequence.,Mus musculus 16 days neonate heart cDNA	116.947	0.141																		5.68
IVGNm01445	AK081131,AK086186	ncRNA		BC115621		AK144911	AK144911	AK080153	AK081765		1597			1598		1	0				2		2	3						186.429	0.125																		5.734
IVGNm01446	AK086316,AK155884,NM_010513	mRNA		AK040698					NM_010513		11978	4107	269433	281411	20	0.043	0	1.747			15	2	1	1		uc009hja.1,uc009hjc.1	NM_010513	Igf1r	insulin-like growth factor I receptor	6844.23	0.571	7533.12																	5.453
IVGNm01447	AK086471	ncRNA				AK006287,AK139102,AK169898,BC026784,NM_029339	AK139102				1194			1194		1	0				3									194.925	0.163	17.4676																	6.365
IVGNm01448	AK086683	ncRNA	TRUE								2016		5293	7309	2	0.276	0	0.992			3									453.58	0.225	12.9057																	5.24
IVGNm01449	AK086754,BC094549	mRNA		AK196689		BC042662	BC042662	AK135796			3090			3090		1	0				1									491.934	0.216	81.7122				28.3174	21.5855	25.2262	11.0067	13.576	5.94324	11.6526	159.471	2.65785	0.795007	0.180006	54.6812	-174.023	9.126
IVGNm01451	AK040391,AK044954,AK086762,AK088018,AK167404,AK210204,BC002178,BC026722,BC033275,BC057971,BC072658,NM_053119	mRNA		BC033913							4096	873	9210	10747	7	0.108	0	6.295			3	1	1		9	uc009kgx.1,uc009kgy.1	NM_053119	Echs1	1, RIKEN full-length enriched library, clone:D930049N01 product:enoyl Coenzyme A hydratase, full insert sequence., mitochondrial, short chain,15 days embryo head cDNA,enoyl Coenzyme A hydratase	654.696	0.607	1941.48				1018.47	913.416	1045.36	952.688	859.955	636.508	282.768	1333.91	22.2318	0.964676	1.96416	1749.62	1077.82	11.527
IVGNm01452	AK038019,AK086889	ncRNA		NM_010485			AK043043			AK011870,AK034536,AK075818,AK078333,AK080365,AK148528,BC016194,NM_010485	2461			2461		1	0		1		3									311.707	0.153	-17.4143	TRUE																11.897
IVGNm01453	AK086910,AK169884	mRNA,ncRNA				AF299338,AF299339,AK075861,BC025878,CT010402,EU886466,FJ621493,NM_001127351,NM_001177804,NM_022433	NM_001127351				2513			2513		1	0		1		1									166.702	0.083	11.645																	5.322
IVGNm01454	AK086971	ncRNA	TRUE								443		3241	3684	2	0.12	0	4.515								uc009kca.1		AK086971	RIKEN full-length enriched library, clone:E030016K11 product:unclassifiable, full insert sequence.,Mus musculus 0 day neonate lung cDNA	16.834	0.038																		5.365
IVGNm01455	AK086985	ncRNA						AK002926			1015		2668	3683	2	0.276	0	1.97												120.551	0.119	-13.8521																	6.462
IVGNm01456	AK087103,AK171859,BC011319,NM_009884	mRNA							NM_009884		4702	4415	5443	10145	1	0.397	0	0.279			10	1	1	1		uc009gjk.1	NM_009884	Cebpg	CCAAT/enhancer binding protein gamma	1197.64	0.282	1386.58				5293.38	4566.84	1880.99	826.959	635.88	637.832	589.263	68.0579	1.1343	0.990607	0.0835524	49.3309	109.704	7.006
IVGNm01457	AK086010,AK087237,BC099577	ncRNA		AK076974					AK152534		2022		2569	4377	5	0.413	0	2.654			1					uc009jts.1,uc009jtt.1,uc009jtu.1		AK086010,AK087237,BC099577	RIKEN full-length enriched library, clone:D830044I16 product:unclassifiable, full insert sequence.,Mus musculus 16 days neonate heart cDNA	303.667	0.161	34.7282				56.0626	52.324	55.0261	45.7858	50.0001	24.7495	27.7994	612.768	10.2128	0.832134	0.0614792	174.33	-404.47	7.655
IVGNm01458	AK087248	ncRNA		AK152342		BC156432	BC156432				1063		6612	7675	1	0.139	0	0.941			1		2	1		uc009gsj.1		AK087248	RIKEN full-length enriched library, clone:E030038G04 product:unclassifiable, full insert sequence.,Mus musculus 0 day neonate lung cDNA	189.93	0.179	0.8571																	5.916
IVGNm01459	AK087307,NR_030681	ncRNA							NM_133743		1080		736	1816	1	0.595	0	0.926			1							Gm4598		223.754	0.207	9.5752																	6.995
IVGNm01460	AF331457,AK089282,AK154746,AY040628,NM_001174155,NM_145149	mRNA			NM_001146023						4630	2034	14411	19023	16	0.136	0.439	7.033			3					uc009gas.1	NM_145149	Rasgrp4	RAS guanyl releasing protein 4	2108.66	0.723	2668.91
IVGNm01461	AK087377	ncRNA						BC057080			1109		6108	7217	2	0.154	0	1.803			2		2	2						47.876	0.043	34.6105																	10.634
IVGNm01462	AK087515	mRNA					AK019476	AK015712			1489		49592	51081	1	0.029	0	0.672			4									297.571	0.2	4.6469				37.6866	29.4137	29.2403	16.775	29.504	12.9253	15.6512							7.055
IVGNm01463	AK087567,BC165999,NM_007562,U88064	mRNA		AK080712							4663	2970	20975	25638	4	0.124	0.637	1.346	1		10	1	1	2		uc009icu.1	NM_007562	Bnc1	basonuclin 1	2243.58	0.645	1770.43																	6.734
IVGNm01464	AK031468,AK047116,AK087602	mRNA	TRUE								3444			3444		1	0		1		9		2	3		uc009jgb.1		AK031468	RIKEN full-length enriched library, clone:6030437H22 product:unclassifiable, full insert sequence.,Mus musculus 13 days embryo male testis cDNA	967.486	0.281	99.1406																	5.309
IVGNm01465	AK048108,AK087632,AK165252,NR_015614	mRNA									3007	159	8681	11122	2	0.219	0	0.819			3				1			E230029C05Rik		437.333	0.145	1.7121																	5.514
IVGNm01466	AK020732,AK051086,AK054320,AK087668,AK155884,BC027571,BC062186,NM_010513	mRNA		AK040698					NM_010513		11978	4107	269433	281411	20	0.043	0	1.747			15	2	4	6		uc009hja.1,uc009hjc.1	NM_010513	Igf1r	insulin-like growth factor I receptor	6844.23	0.651	7533.12				343.578	356.742	232.108	170.446	114.833	61.016	37.3187	192.893	3.21488	0.982291	0.0399148	127.406	396.899
IVGNm01468	AK087777	mRNA									1729		172	1901	1	0.91	0	0.578												636.213	0.368	147.441																	6.014
IVGNm01469	AK010872,AK088383,BC055882,NM_024253	mRNA									881	495	431	1177	3	0.611	0.531	3.699					1			uc009gmq.1,uc009gmr.1	NM_024253	Nkg7	RIKEN full-length enriched library, clone:E430014G21 product:natural killer cell group 7 sequence, full insert sequence.,2 days neonate thymus thymic cells cDNA,natural killer cell group 7 sequence	151.483	0.172	662.102																	5.574
IVGNm01470	AK051862,AK088516,NM_008855,X53532	mRNA									8829	2019	336477	345277	16	0.009	0	5.504	2		5		1			uc009jou.1	NM_008855	Prkcb1	beta 1,protein kinase C	3612.51	0.829	2052.11				37.7067	26.34	38.9823	25.3276	35.6828	19.6469	26.5359							5.331
IVGNm01471	AK089370,BC026378,NM_010645	mRNA						AK089445			867	786	3701	4568	4	0.186	0.903	4.723			1		1			uc009goc.1	NM_010645	Klk1b1	kallikrein 1	50.873	0.06	150.696																	5.666
IVGNm01472	AK089445	ncRNA		BC048869							1067		37448	38515	2	0.028	0	1.874			2									165.628	0.155	-8.6647				767.632	754.914	660.107	632.581	502.689	406.181	324.947	407.531	6.79219	0.993691	0.0132041	299.823	636.01	12.082
IVGNm01473	AK052930,AK089490,AK090059,AK170863,BC025890,BC043472,BC069857,BC141195,NM_146206	mRNA									2998	2196	98214	100922	24	0.027	0.462	9.562					1			uc009kqv.1,uc009kqw.1,uc009kqx.1,uc009kqy.1	NM_146206	Tpcn2	RIKEN full-length enriched library, clone:A530030P09 product:hypothetical Calcium and sodium channel pore region (S4-S6)/Cation channels TM region (not potassium)/Cation channels (non-ligand gated) containing protein, full insert sequence.,Mus musculus adult male aorta and vein cDNA,Tpcn2 protein.,two pore segment channel 2	1247.1	0.462	2025.28				41.4937	37.6789	44.5319	32.0474	29.8317	18.0387	24.1989	320.21	5.33683	0.803209	0.0964001	104.618	-301.872	9.21
IVGNm01474	AK090234,NM_001101488	mRNA							NM_001101488		3924	966	200069	203993	6	0.019	0.246	1.529			3		1	1				Gsg1l		1376.39	0.351	944.716																	5.783
IVGNm01475	AK090265	mRNA									2134		1045	3180	2	0.671	0	0.937			4		1							413.079	0.194	196.054																	6.227
IVGNm01476	AK129235,AK204257,BC052933,BC075676,BC077714,BC085152,NM_001163774,NM_001163775	mRNA			AK135526						5249	3720	14306	19291	18	0.213	0.635	5.409			2	1	1	1		uc009jtg.1,uc009jth.1		Taok2,mKIAA0881	RIKEN full-length enriched library, clone:5930425F14 product:Serine/threonine protein kinase TAO2 homolog [Rattus norvegicus], full insert sequence.,Mus musculus 13 days embryo forelimb cDNA,Serine/threonine-protein kinase TAO2 (EC 2.7.11.1) (Thousand and one amino acid protein 2).	4492.8	0.98	4770.65				103.862	102.395	93.2147	61.6412	76.4122	63.6857	75.0387	92.5269	1.54211	0.790627	0.315088	31.4043	-97.7766	9.617
IVGNm01477	AK129467	mRNA									3516	1386	1756	5272	1	0.667	0.394	0.284			4	2	1	1						1323.82	0.377	119.808																	6.907
IVGNm01478	AK131623	ncRNA		BC156432					BC040821		1089		9568	10657	2	0.102	0	1.837	1		2		2	2						127.184	0.117	20.2335																	6.241
IVGNm01479	AK010261,AK131624,AK134921,AK148747,AK149111,AK149568,AK150834,AK159105,AK159424,AK159517,AK184330,BC028816,BC044785,BC083351,CT010212,CT010356,M12414,M73490,NM_009696	mRNA									1271	938	2241	2944	4	0.194	0	7.421					1	1		uc009fmx.1,uc009fmy.1	NM_009696	Apoe	RIKEN full-length enriched library, clone:7120484D01 product:apolipoprotein E, full insert sequence. (Fragment).,2 days neonate sympathetic ganglion cDNA,apolipoprotein E	417.04	0.53	1634.75				165.474	183.372	270.02	213.993	251.107	182.267	171.166							10.499
IVGNm01480	AF335543,AK131659,BC011091,BC096566,NM_024439	mRNA		AK080637							1191	564	9158	9757	5	0.059	0	5.263			1		1	1		uc009hha.1	NM_024439	H47	selenoprotein S	695.217	0.616	936.916				106.985	107.862	89.6543	64.2288	49.2139	25.1712	25.1477	253.217	4.22028	0.988559	0.0252212	177.527	441.418	9.777
IVGNm01481	AK131672	ncRNA		AB013468					NM_001005511	AB013466,AB013467,AF079971,AK045451,AK078067,AK143829,AK168979,AK172050,BC004662,BC088833,NM_001112701,NM_011181	898			898		1	0						1	1						330.317	0.368	-329.421																	6.074
IVGNm01482	AK131755	ncRNA						AK147329			1096		1386	2482	2	0.442	0	1.825			1			1						36.433	0.033	43.2027																	6.506
IVGNm01483	AK131801	ncRNA						AK034439			1362			1362		1	0				2		1	1						715.613	0.525	-280.109
IVGNm01484	AJ238978,AK008772,AK008808,AK008930,AK018597,AK131880,AK168715,BC125319,BC132207,NM_001136089	mRNA									1759	975	64312	66071	11	0.017	0.327	10.138			7	2	1	1		uc009lup.1,uc009luq.1	NM_011922	Anxa10	annexin A10	887.498	0.8	1339.09																	5.26
IVGNm01486	AK013998,AK046181,AK132619,AK168146,NM_028427	mRNA		AK090347							1193	798	20727	21849	5	0.05	0.649	4.575			1		1			uc009lvb.1	NM_028427	3110005G23Rik	hypothetical protein LOC73067	531.53	0.476	678.579				847.233	897.168	747.542	638.962	444.25	243.495	161.711	385.309	6.42181	0.990543	0.0167596	269.238	677.297	11.552
IVGNm01487	AK012085,AK054473,AK132677,AK216078,BC010496,BC068194,NM_009383,U55861	mRNA									4301	1176	17496	21737	12	0.076	0	12.658	1		3	1	2	1		uc009jyy.1,uc009jyz.1,uc009jza.1	NM_009383	Tial1	Tial1 cytotoxic granule-associated RNA binding	3293.17	1.003	1206.41				1023.71	1009.14	836.535	724.351	526.913	484.228	441.587	200.168	3.33613	0.99253	0.0249432	150.128	300.245	12.873
IVGNm01488	AK132765	ncRNA			AB025413				AK032194		1197		39012	40209	3	0.03	0	2.506			1					uc009iiu.1		AK132765	RIKEN full-length enriched library, clone:4922505H01 product:unclassifiable, full insert sequence.,Mus musculus adult male testis cDNA	349.228	0.292	-1.3799																	5.957
IVGNm01489	AK132834	ncRNA							AK171181		2144		367	2511	1	0.854	0	0.466	1		1									223.087	0.104	-5.5713																	6.021
IVGNm01490	AK132883	ncRNA							AK049009		1160		173	1333	1	0.87	0	0.862			1		1	1						88.593	0.076	19.4851																	5.874
IVGNm01491	AK133139	mRNA	TRUE								1818		2996	4814	2	0.378	0	1.1			2		1	1		uc009hqx.1		AK133139	RIKEN full-length enriched library, clone:4930598G03 product:unclassifiable, full insert sequence.,Mus musculus adult male testis cDNA	35.1	0.019	70.4019																	5.27
IVGNm01492	AK019737,AK133210,AK133230	mRNA									3210	317		3210		1	0.099		1		6	3	2	1		uc009keb.1		AK019737	RIKEN full-length enriched library, clone:4930544L04 product:unclassifiable, full insert sequence.,Mus musculus adult male testis cDNA	265.024	0.083	12.5556																	6.809
IVGNm01493	AK133252	mRNA		DQ695827							2695	456	5586	8282	3	0.326	0.169	1.113			1	1	1							87.037	0.032	-139.238																	5.311
IVGNm01494	AK133275	ncRNA		AK003632	AJ012076			NM_001164087	NM_001004185		3698		343	4041	1	0.915	0	0.27			5		1	2						393.396	0.106	0.2692																	6.973
IVGNm01495	AK133307,NM_001039721,NM_001164658	mRNA									3570	3294	28936	32502	27	0.11	0.672	7.572					1	1		uc009gbd.1	NM_001039721	A230107C01Rik,Catsperg1	hypothetical protein LOC320225	1273.28	0.357	2613.55
IVGNm01496	AK133320	ncRNA	TRUE					AK038939			2694		6549	9243	2	0.291	0	0.742			1									205.67	0.076	15.7063																	7.359
IVGNm01497	AK133534	mRNA					AK002306				2538			2538		1	0				6		1							218.561	0.086	-20.4717																	4.98
IVGNm01498	AK133724,BC046600,BC058228,BC148196,NM_011010	mRNA									2121	492		2121		1	0						1			uc009ike.1	NM_011010	Omp	olfactory marker protein	498.817	0.238	1163.56																	6.566
IVGNm01499	AF162853,AF200687,AF228706,AF369980,AF453571,AK134022,AY050663,BC156504,BC172709,NM_018823,NM_133957	mRNA									13039	4461	81331	85656	15	0.027	0.335	5.777	1		29	1	1	1		uc009nhk.1,uc009nhl.1,uc009nhm.1,uc009nhn.1,uc009nhp.1	NM_018823,NM_133957	Nfat5	nuclear factor of activated T-cells 5 isoform a,nuclear factor of activated T-cells 5 isoform b	8431.35	0.999	2653.65																	6.507
IVGNm01500	AK134188	ncRNA				AK051862,BC127083,NM_008855,X53532,X59274	X59274				2723			2723		1	0		1		3									32.104	0.012	18.658																	6.039
IVGNm01501	AK134263,BC151163,NM_001081007	mRNA									2193	1737	10892	13085	4	0.141	0.792	2.231			3					uc009gdf.1	NM_001081007	Zfp382	zinc finger protein 382	1228.26	0.673	302.905				25.3039	21.0978	19.9523	9.49698	13.7135	11.9267	23.4019							6.35
IVGNm01502	AK135062,D87034	ncRNA		AK186922				AK132765	NM_011858		2462			2462		1	0		3		3		1	1						581.828	1					536.632	410.312	227.287	101.219	53.7738	35.5591	25.0437	85.1446	1.41908	0.998287	0.027735	73.5494	101.08	9.003
IVGNm01503	AK135323	ncRNA				AK046622,AK048952,AK080952,AK080963,AK087396,BC067204,NM_177324	NM_177324				3450		233	3684	1	0.937	0	0.29	2		6		3	4	2					564.988	0.164	-10.0484
IVGNm01504	AB013912,AK135404,AK144156,AK159112,BC072585,BC115809,BC116693,NM_011304	mRNA		AK050813,NM_030678	NM_008497						2174	1392	14025	16199	17	0.116	0.639	9.777			1					uc009gvc.1,uc009gvd.1	NM_011304	Ruvbl2	RuvB-like protein 2	1657.7	0.941	3196.15				2195.7	2247.42	2130.69	1781.53	1330.54	656.948	353.099	550.494	9.1749	0.98696	0.0163817	343.621	1383.28	11.971
IVGNm01505	AK135599	ncRNA									2603		107120	109723	7	0.024	0	2.689	1		2		2	1		uc009mhu.1		AK135599	RIKEN full-length enriched library, clone:4933431K23 product:unclassifiable, full insert sequence.,Mus musculus adult male testis cDNA	301.295	0.116	15.001																	6.513
IVGNm01506	AK077799,AK135615,AK136088,NM_007755,Y08260	mRNA		AK207851	AK199617						2692	1683	104622	107314	11	0.024	0	4.218	1		5		1	1	5	uc009ibw.1	NM_007755	Cpeb1	cytoplasmic polyadenylation element binding	2532.57	0.956	1235.76				301.47	266.21	324.776	299.774	204.3	149.387	126.287	674.698	11.245	0.855763	0.0544867	195.326	-463.961	6.78
IVGNm01507	AK046787,AK135629	ncRNA				AK137126	AK137126				2554			2555		1	0		1		4		1	1						123.553	0.066	21.4182																	9.967
IVGNm01508	AK135654,AK144840,BC011210,NM_173863	mRNA							NM_173863		5110	1857	97136	102246	14	0.034	0.523	4.112			1		1	1		uc009iaz.1	NM_173863	Crtc3	transducer of regulated CREB protein 3	1733.3	0.454	1109.83				87.6819	105.924	60.3105	39.4373	33.9096	18.451	22.5281	140.399	2.33998	0.921498	0.116905	66.9923	-1466.39	8.242
IVGNm01509	AK135701	ncRNA	TRUE								954		47023	47977	5	0.02	0	5.241			2		1							37.174	0.039	-18.4131				32.4639	28.3537	26.1597	22.5177	20.8124	22.9358	37.5194							6.285
IVGNm01510	AK135830	ncRNA							BC148826		1691		2802	4493	1	0.376	0	0.591	1							uc009ixc.1		AK135830	RIKEN full-length enriched library, clone:7420423C01 product:unclassifiable, full insert sequence.,Mus musculus in vitro fertilized eggs cDNA	101.725	0.06	-47.7712																	11.517
IVGNm01511	AK135913	ncRNA									2719		16214	18933	7	0.144	0	2.574			4		2	2						133.275	0.049	42.4035																	5.819
IVGNm01512	AK135982,BC086658,NM_001024703	mRNA									5789	2637	222977	228766	22	0.025	0	3.8	2		19	2	1	2		uc009hnp.1	NM_001024703	Mctp2	transmembrane 2,multiple C2 domains	2703.49	0.467	2384.8																	15.29
IVGNm01513	AK135984	ncRNA		AK197529				AK010534			1349		90	1439	1	0.937	0	0.741					1	1						88.529	0.066	-23.8254																	6.802
IVGNm01514	AK028524,AK080915,AK135891,AK136015,BC003433,BC055361,NM_007908,U93848	mRNA		AK079976							3079	2172	58040	61119	17	0.043	0.705	7.764						1		uc009jnb.1,uc009jnc.1,uc009jnd.1	NM_007908	Eef2k	eukaryotic elongation factor-2 kinase	2048.49	0.858	3533.28				180.621	185.904	190.835	117.138	62.9488	33.7606	32.1436	287.905	4.79841	0.936277	0.0551038	139.82	-4870.26	8.852
IVGNm01515	AK136021	ncRNA	TRUE								688		23406	24094	3	0.029	0	4.36								uc009jil.1		AK136021	RIKEN full-length enriched library, clone:A730082K24 product:unclassifiable, full insert sequence.,Mus musculus 7 days neonate cerebellum cDNA	114.902	0.167	-95.8882																	5.703
IVGNm01516	AK030662,AK046533,AK136296,BC117761,BC127156,NM_178395	mRNA									3369	1101	58743	61899	13	0.029	0.326	7.391			9	2	1	1		uc009lmo.1,uc009lmp.1	NM_178395	Zdhhc2	DHHC domain containing 2,zinc finger	1515.35	0.665	427.826				2450.92	2334.93	2338.27	2194	2109.38	1999.13	1814.26	544.855	9.08092	0.970826	0.0248102	286.397	5585.43	15.453
IVGNm01517	AK018670,AK131860,AK136454,BC030870,NR_033217	mRNA									1480	218	42444	43924	2	0.015	0.331	3.04			3		1	2		uc009lvi.1		AK131860,BC030870	RIKEN full-length enriched library, clone:9130410O22 product:hypothetical protein, full insert sequence.,Mus musculus adult male cecum cDNA	255.267	0.238	9.4276																	6.311
IVGNm01518	AK136672	ncRNA	TRUE								2715		123822	126537	4	0.021	0	1.473			1		1	1						192.966	0.071																		5.981
IVGNm01519	AK136710	ncRNA									1184		5588	6772	4	0.175	0	3.378					1							363.246	0.307	-33.2867				53.6986	55.439	59.4574	49.1224	51.2624	39.7587	60.5529							6.769
IVGNm01520	AK136833	mRNA						NM_029609			1581		926	2507	1	0.631	0	0.633			1									214.125	0.135	50.27																	6.705
IVGNm01521	AK137196,BC094325,NM_001081021	mRNA									5511	2418	18098	20023	5	0.096	0	2.597	2		7	1	1		3	uc009fxl.1,uc009fxm.1	NM_001081021	Zfp780b	RIKEN full-length enriched library, clone:B230208L21 product:similar to finger protein mfg2 [Mus musculus], full insert sequence.,Mus musculus adult male corpora quadrigemina cDNA,zinc finger protein 780B	884.491	0.16	141.312				123.855	114.193	54.9445	34.8344	35.7567	26.2994	33.3706	68.2216	1.13703	0.97688	0.131641	42.6505	170.362	6.474
IVGNm01522	AK050985,AK137273,AK145721,AK184777	mRNA					AY177410				4321	1704	114987	118542	15	0.008	0	5.093	1	1	7		2	1		uc009kah.1,uc009kai.1,uc009kaj.1	NM_021314	Tacc2	acidic coiled-coil containing, clone MNCb-3527, similar to AF220152 TACC2 (Homo sapiens).,Mus musculus brain cDNA,transforming	2521.1	0.709	2189.25				106.583	107.719	90.7382	90.4581	76.044	53.8122	59.8317	305.587	5.09312	0.95048	0.0460378	157.584	5026.83	11.668
IVGNm01523	AF099053,AK036368,AK048026,AK081275,AK137415,BC009013,BC053517,NM_013782	mRNA						AK208491			2998	1419	22697	25695	11	0.059	0.467	7.736					1	1		uc009kjq.1	NM_013782	Ptdss2	phosphatidylserine synthase 2	1317.55	0.849	1065.55				491.184	496.654	588.165	536.11	454.642	318.977	185.853	1425.5	23.7584	0.895139	1.74056	2479.05	1000.37	9.717
IVGNm01524	AK009950,AK137460,BC132424,BC132426,NM_007710,X03233	mRNA									2606	1146	9138	11748	8	0.128	0.409	5.271			1		1	1		uc009flu.1	NM_007710	Ckm	muscle,creatine kinase	1393.19	0.851	1758.76																	9.329
IVGNm01525	AF220014,AF220015,AK137592,BC005447,J03776,NM_009099	mRNA									3770	1488	95760	98745	7	0.03	0.152	1.906			2		1			uc009iwh.1	NM_009099	Trim30	tripartite motif protein 30	241.673	0.065	169.674																	4.845
IVGNm01526	AK137630	mRNA									3275	2443		3276		1	0.746				5	1								1322.79	0.404	101.763																	6.025
IVGNm01527	AF080580,AF098949,AK137841,AK158380,BC038681,NM_009940	mRNA									3069	1011	22428	23643	6	0.051	0.129	7.645			4		1	2		uc009jjy.1,uc009jjz.1	NM_009940	Coq7,clk-1	complete cds.,Mus musculus CLK-1 (clk-1) mRNA,demethyl-Q 7	466.606	0.624	1236.95				992.622	1208.67	954.436	858.803	620.94	263.968	100.005	529.312	8.82187	0.960845	0.0294678	259.303	-12819.4	6.643
IVGNm01528	AK137863	mRNA,ncRNA							BC063263		883			883		1	0				1		1	1						44.195	0.05			linc1382															5.94
IVGNm01529	AK137920	ncRNA							AK137326		958			958		1	0				2		1	1						97.099	0.101																		10.038
IVGNm01530	AK137970	ncRNA				AK051862,BC127083,NM_008855,X53532,X59274	X59274				1787			1787		1	0				2									203.076	0.114	-27.4795																	5.657
IVGNm01532	AK138132	mRNA		NM_133942							1749		3283	5032	1	0.348	0	0.572			1		1	1						98.291	0.056	111.06																	6.11
IVGNm01533	AK138221	ncRNA	TRUE								1555		1415	2970	1	0.524	0	0.643	1		5		1							225.524	0.145	10.4917																	6.086
IVGNm01534	AK138341	ncRNA				AK046263,BC138962,BC138963,BC148535,NM_008074,X59300	X59300				3397			3397		1	0		2		5									143.572	0.042																		5.535
IVGNm01535	AK049871,AK138381	ncRNA	TRUE						AK012322		1893		63449	65342	3	0.029	0	1.585			8		1	1		uc009hnh.1		AK049871	RIKEN full-length enriched library, clone:C630005I06 product:unclassifiable, full insert sequence.,Mus musculus adult male hippocampus cDNA	555.473	0.293	-29.2745																	5.43
IVGNm01536	AK138425	mRNA			AK186221			AK137126			2500	417	1001	3501	4	0.714	0.167	1.6			2	2	1							639.832	0.256	449.523				32.4422	26.1244	32.0194	23.1104	27.4215	20.9873	21.6345							7.37
IVGNm01537	AK138549	ncRNA	TRUE	AK163446						AK049609,AK140908,AK142284,AK163446,NM_011083,U52193	749			749		1	0						1	1						47.306	0.063	5.0433				126.134	115.854	96.137	75.304	56.6651	39.4263	47.0095	178.283	2.97139	0.992907	0.0270004	134.924	262.707	7.708
IVGNm01538	AK084981,AK138789	mRNA					AK051365				2563		20070	22633	1	0.1	0	0.446	1		2											38.221																	5.136
[truncated: 33,000 more rows]
[truncated: 5 more columns]
