# Supplementary material for: Genome-wide analysis of long noncoding RNA stability
Source: HighWire-hosted journal article supplement (doi:10.1101/gr.131037.111), 2012-03-09
Supplement: Supp_Table_4.xlsx [file Supp_Table_4.xlsx]

## Sheet: GATHER oncogene enrichments
Abl1
Bcl2
Erbb2
Fos
Jun
Myb
Myc
Pim1
Ski

## Sheet: Unigene IDs in 3 superclusters
9130011E15Rik
Ehmt2
Eif4g2
Fam178a
Fbxo21
Fibp
Gigyf2
Hmg20a
Itgav
Klhl2
Mib1
Ndrg3
Nrp1
Ogdh
Prkaca
Rbl1
Srxn1
Tcf4
Tro
Trp53inp2
Vps53
