# Supplementary material for: Genome-wide analysis of long noncoding RNA stability
Source: HighWire-hosted journal article supplement (doi:10.1101/gr.131037.111), 2012-03-09
Supplement: Supp_Table_5.xlsx [file Supp_Table_5.xlsx]

## Sheet: Conserved Human & Mouse
Data from Friedel et al. 2009
Human (B-cells)						Mouse (fibroblasts)
Affy Gene ID	lncRNAdb ID	Half-life [min]	Std deviation			Affy Gene ID	lncRNAdb ID	Half-life [min]	Std deviation
GAS5	GAS5	204.966	70.1907			Gas5	Gas5	153.188	47.8353
MALAT1	MALAT1	991.95	334.652			Malat1	Malat1	180.872	70.8423
TncRNA	NEAT1 v2	438.73	182.855			2310043N10Rik	Neat1 V1 + v2	54.175	23.9463
SNHG1	SNHG1	102.233	12.8192			Snord22	Snhg1	94.8706	12.4652
SNHG3	SNHG3	88.2181	51.2151			Rnu17d /// LOC670438	Snhg3	209.038	93.6312
SNHG4	SNHG4 (transcript variant 2)	488.43	25.3515			1110061A14Rik	Snhg4	75.5076	45.5656
LOC727839_///_MATR3_///_SNHG4	SNHG4 (transcript variant 1)	801.15	172.355
SNHG5	SNHG5	133.587	42.85			2810026P18Rik	Snhg5	51.4576	10.2063
SNHG6	SNHG6	424.619	188.157			1110008H02Rik	Snhg6	129.589	28.5245
SRA1	SRA1	327.133	122.832			Sra1	Sra1	493.256	128.919
TI-227H_///_TUG1	TUG1	218.582	70.2276			Tug1	Tug1	182.087	34.2773
TUG1	TUG1	235.672	45.8536
C20orf199_///_TALDO1	ZFAS1	182.581	62.137			1500012F01Rik	Zfas1	102.134	48.068
