# Supplementary material for: Genome-wide analysis of long noncoding RNA stability
Source: HighWire-hosted journal article supplement (doi:10.1101/gr.131037.111), 2012-03-09
Supplement: Supp_Table_6.xlsx [file Supp_Table_6.xlsx]

## Sheet: Sheet1
Gene	Forward primer	Reverse Primer
2410002O22Rik	CTGACGCTCCTGTCCTCAGT	TTGCGCGATGTCATCATATT
Airn	GTGGGAGGGATCTTAGCACA	AGAATGGGCTGTGTGTTTCC
Ak042662	CACCAGTACCTGAAACCCCATA	TGCATGTGTGTATCCCTGACC
Atp5e	CCGGTTTGAGGCTACTCTGA	AGATCTGGGAAAACCGGATG
Blm	GGAAATATCTCACTGCGTGCT	TGACGTGAGTTTCCTTCGTATG
Cbr3	ACACCCTTCGACATTCAAGC	GGCTTTTAACCCCTGCAGAC
Clcn6	GATGAGCATGTGGCTTCTGA	GGGTATAGGTTGGGGTAGGG
D7Ertd715e (Ak035508)	GTCCGAACCTGTGAACTTCTG	GGCTGTAGAACCAACGGCTA
Gapdh	AACTTTGGCATTGTGGAAGG	GGATGCAGGGATGATGTTCT
Gstm1	CAAACCTGAGGGACTTCCTG	TTACTCCAGTGGGCCATCTT
Malat1	TAAGCGCTTGCCTCTGTCTT	CACCTGCATTCTGTGTGGTC
Myc	CTGCTGTCCTCCGAGTCCT	GCCTCTTCTCCACAGACACC
Neat1 (v1 + v2)	TGAGTGCTTTGCCACTGAAT	TAACAGCTTCCCCTCTGCTC
Neat1 (v2)	TGGGGATTATTGAGCTGAGG	CTCCTGAGTACCGGGATGAA
Nuf2	AGCGAGAGGAGTTCAAGCAG	TCGGATTTCATTTTGGCATA
Ppia	GCTGGACCAAACACAAACG	CGCAAGTCAAAAGAAATTAGAGC
Rtn4 intron1 (Ak047982)	GCTTCTGGTGATGGTGGTTT	CCTACTTCCTCCCAGGTTCC
Sirt6	AGGAGGCCGTCTGGTCAT	ATCACCTCATCCACGTAGCC
Spag5	GCAGGTTGTGAAGGAAGTGG	GCCGAGAGATCTGCAGTAAGG
Xist	AGCTTACAGGCCACATGGAG	GGATCGTCAAAGGGAATAGG
Zfas1	GATGGTTGACCTGACCAAGC	CAGGAGTTCACGCTCCATTC
Zfp575	TGGGTGGAAGCGTGAAGT	CTCGGCAGGTCCTGGTGT
